# Supplementary material for: Metabolomic Analysis Reveals Nutritional Diversity among Three Staple Crops and Three Fruits
Source: Foods. 2022 Feb 15;11(4):550. doi: 10.3390/foods11040550 (PMC8870860; doi:10.3390/foods11040550)
Supplement: Supplementary file 1 [file foods-11-00550-s001.zip › Supplement Tables.xlsx]

## Sheet: Table S1
Table S1. Metabolic signals deteceted in the three fruits and three crops
ID	Name	Chemical Formula	Molecular Weight	RT [min]	Species
SDW00001	6-Fluoro-2-quinolinecarbaldehyde	C10 H6 F N O	176.026	17.1691	Mango
SDW00003	2-Amino-1,3,4-octadecanetriol	C18 H39 N O3	317.292	9.61326	Mango
SDW00004	L-Norleucine	C6 H13 N O2	131.095	1.0303	Mango
SDW00005	Unknown	unknown	129.994	17.019	Mango
SDW00006	2-Mercaptoethanol	C2 H6 O S	78.0146	0.859398	Mango
SDW00007	Betaine	C5 H11 N O2	117.079	0.752548	Mango
SDW00008	Valine	C5 H11 N O2	100.053	0.855819	Mango
SDW00009	6-Methoxyquinoline	C10 H9 N O	159.068	1.6745	Mango
SDW00010	Unknown	unknown	129.994	16.6762	Mango
SDW00011	DL-Arginine	C6 H14 N4 O2	174.111	0.739257	Mango
SDW00013	Unknown	unknown	68.0631	0.958014	Mango
SDW00015	D-(+)-Tryptophan	C11 H12 N2 O2	204.09	2.77548	Mango
SDW00016	trans-3-Indoleacrylic acid	C11 H9 N O2	187.063	2.77567	Mango
SDW00017	2-Amino-1,3,4-octadecanetriol	C18 H39 N O3	317.292	10.0045	Mango
SDW00018	L-Phenylalanine	C9 H11 N O2	165.079	1.81009	Mango
SDW00019	Unknown	C2 H3 F3 P2	145.967	17.1106	Mango
SDW00021	N-Benzyl-3-(triisopropylsilyl)-N-[3-(triisopropylsilyl)-2-propyn-1-yl]-2-propyn-1-amine	C31 H53 N Si2	495.332	11.1891	Mango
SDW00022	Unknown	C11 H24 F2 N2 O2 P2 S2	380.071	0.741245	Mango
SDW00023	3-Chloro-5,5-dimethyl-2,4-imidazolidinedione	C5 H7 Cl N2 O2	162.02	17.0184	Mango
SDW00024	Choline	C5 H13 N O	103.1	1.12358	Mango
SDW00025	3-Chloro-5,5-dimethyl-2,4-imidazolidinedione	C5 H7 Cl N2 O2	162.02	16.8282	Mango
SDW00026	Unknown	C2 H3 F3 P2	145.966	17.2779	Mango
SDW00027	Allopurinol	C5 H4 N4 O	136.052	0.916531	Mango
SDW00029	Unknown	unknown	129.994	16.4531	Mango
SDW00030	Choline	C5 H13 N O	103.1	0.762252	Mango
SDW00031	3-Chloro-5,5-dimethyl-2,4-imidazolidinedione	C5 H7 Cl N2 O2	162.02	16.5935	Mango
SDW00032	Unknown	unknown	97.9685	17.0328	Mango
SDW00033	Unknown	unknown	97.9685	16.8374	Mango
SDW00034	L-Tyrosine	C9 H11 N O3	181.074	0.973978	Mango
SDW00035	N-Benzylmethanimine	C8 H9 N	102.047	1.81222	Mango
SDW00036	Unknown	C3 H7 F3 O P2	177.993	17.0776	Mango
SDW00038	AB-005	C23 H32 N2 O	330.276	11.6465	Mango
SDW00039	Unknown	C5 H12 F O4 P S	218.019	0.743609	Mango
SDW00041	AB-005	C23 H32 N2 O	352.258	11.5198	Mango
SDW00042	HFC-245ca	C3 H3 F5	134.016	17.0493	Mango
SDW00043	2,3-Difluoro-4-methoxyphenol	C7 H6 F2 O2	160.022	0.627189	Mango
SDW00045	Unknown	unknown	97.9685	16.6844	Mango
SDW00046	Unknown	unknown	132.027	0.642313	Mango
SDW00048	2,3-Difluoro-4-methoxyphenol	C7 H6 F2 O2	160.022	0.311007	Mango
SDW00049	L-Tyrosine	C9 H11 N O3	164.047	1.14989	Mango
SDW00051	Unknown	C5 H7 N2 O4 P	190.015	17.029	Mango
SDW00052	Unknown	C5 H7 N2 O4 P	190.015	16.8215	Mango
SDW00053	Valine	C5 H11 N O2	117.079	1.26802	Mango
SDW00054	Furfuranol	C5 H6 O2	98.0371	0.858349	Mango
SDW00055	D-(+)-Proline	C5 H9 N O2	115.064	0.81863	Mango
SDW00056	Unknown	C38 H62 N4 O	590.49	14.7722	Mango
SDW00057	AB-005	C23 H32 N2 O	330.276	11.3861	Mango
SDW00058	3-Chloro-5,5-dimethyl-2,4-imidazolidinedione	C5 H7 Cl N2 O2	162.02	16.4363	Mango
SDW00059	N1-(3-chlorophenyl)-2-[2-(trifluoromethyl)-4-quinolyl]hydrazine-1-carboxamide	C17 H12 Cl F3 N4 O	380.071	0.712683	Mango
SDW00060	Unknown	C2 H5 F3 O P2	163.977	17.1705	Mango
SDW00061	DL-Glutamine	C5 H10 N2 O3	129.043	0.8131	Mango
SDW00062	N-Methyl-2-pyrrolidone	C5 H9 N O	99.0688	2.12299	Mango
SDW00063	Unknown	C14 H33 F N6 O3	352.258	11.3511	Mango
SDW00065	Unknown	C6 H4 F3 N2 O3 P	239.992	16.3856	Mango
SDW00066	Unknown	C3 H2 O3 S	117.972	17.076	Mango
SDW00067	L-Histidine	C6 H9 N3 O2	155.069	0.783806	Mango
SDW00068	1-palmitoyl-3-linoleoylglycerol	C37 H68 O5	592.506	15.3494	Mango
SDW00069	Unknown	unknown	174.038	0.641176	Mango
SDW00070	6-Fluoro-2-quinolinecarbaldehyde	C10 H6 F N O	176.026	0.175092	Mango
SDW00071	[Similar to: 2-{2-[(2Z)-pent-2-en-1-yl]-3-{[3,4,5-trihydroxy-6-(hydroxymethyl)oxan-2-yl]oxy}cyclopentyl}acetic acid; ΔMass: -256.1822 Da]	unknown	118.012	0.626947	Mango
SDW00072	Unknown	unknown	84.0217	1.22451	Mango
SDW00073	Serotonin	C10 H12 N2 O	176.095	1.73477	Mango
SDW00074	Unknown	unknown	148.005	17.0269	Mango
SDW00076	Picolinic acid N-oxide	C6 H5 N O3	138.043	0.894575	Mango
SDW00077	Unknown	C4 H7 F3 O2 P2	205.987	17.1304	Mango
SDW00078	2-Mercaptoethanol	C2 H6 O S	78.0146	1.07438	Mango
SDW00080	2-(14,15-Epoxyeicosatrienoyl) glycerol	C23 H38 O5	354.276	11.3809	Mango
SDW00081	2,3-Dihydroxypropyl stearate	C21 H42 O4	358.308	12.2366	Mango
SDW00082	Unknown	unknown	97.9685	16.5077	Mango
SDW00083	Unknown	C3 H7 F3 O P2	177.993	17.255	Mango
SDW00084	L-Glutathione (reduced)	C10 H17 N3 O6 S	290.057	0.876815	Mango
SDW00085	L-Glutathione (reduced)	C10 H17 N3 O6 S	307.083	0.850389	Mango
SDW00086	N-Benzyl-3-(triisopropylsilyl)-N-[3-(triisopropylsilyl)-2-propyn-1-yl]-2-propyn-1-amine	C31 H53 N Si2	495.332	10.9595	Mango
SDW00087	Unknown	unknown	148.005	16.8455	Mango
SDW00088	Unknown	C3 H5 P S	103.985	8.99282	Mango
SDW00089	Citric acid	C6 H8 O7	192.027	0.844158	Mango
SDW00090	Unknown	C3 H3 F3 O P2	173.961	17.5776	Mango
SDW00091	4-Amino-1,2,5-oxadiazole-3-carboxamide 2-oxide	C3 H4 N4 O3	144.042	17.2619	Mango
SDW00092	Glycerophospho-N-palmitoyl ethanolamine	C21 H44 N O7 P	453.285	11.2133	Mango
SDW00093	Unknown	C3 H3 F3 O P2	173.962	17.2313	Mango
SDW00094	L-Histidine	C6 H9 N3 O2	155.069	0.659423	Mango
SDW00095	Unknown	C21 H39 F3 O2	380.289	12.1338	Mango
SDW00096	D-(+)-Pipecolinic acid	C6 H11 N O2	112.052	0.865988	Mango
SDW00097	7-(Î²-D-Glucopyranosyloxy)-2,3-dihydro-2-oxo-1H-indole-3-acetic acid	C16 H19 N O9	369.105	3.48688	Mango
SDW00100	Acetophenone	C8 H8 O	120.058	1.21395	Mango
SDW00101	Choline	C5 H13 N O	103.1	11.3128	Mango
SDW00102	2-(14,15-Epoxyeicosatrienoyl) glycerol	C23 H38 O5	354.276	11.1457	Mango
SDW00103	2-(14,15-Epoxyeicosatrienoyl) glycerol	C23 H38 O5	376.258	11.3855	Mango
SDW00104	4,4'-Thiodianiline	C12 H12 N2 S	194.094	7.57118	Mango
SDW00105	N-Nitro-1-nitroso-4,5-dihydro-1H-imidazol-2-amine	C3 H5 N5 O3	157.989	17.0294	Mango
SDW00106	Unknown	unknown	148.005	16.6823	Mango
SDW00107	Trigonelline	C7 H7 N O2	137.048	0.796837	Mango
SDW00108	N-Nitro-1-nitroso-4,5-dihydro-1H-imidazol-2-amine	C3 H5 N5 O3	157.989	16.841	Mango
SDW00109	Furfural	C5 H4 O2	96.0216	1.22499	Mango
SDW00110	Unknown	unknown	84.0217	0.834419	Mango
SDW00111	Unknown	C13 H20 N2 O7 S2	380.071	0.901944	Mango
SDW00112	2-Arachidonoyl glycerol	C23 H38 O4	356.292	11.7609	Mango
SDW00113	2-Arachidonoyl glycerol	C23 H38 O4	356.292	11.5146	Mango
SDW00114	Unknown	unknown	103.956	17.2553	Mango
SDW00116	Unknown	unknown	114.017	0.642849	Mango
SDW00117	Dopamine	C8 H11 N O2	153.079	0.891882	Mango
SDW00118	Unknown	C25 H46 F N3 O7	519.332	10.8647	Mango
SDW00119	Unknown	C5 H7 N2 O4 P	190.015	16.662	Mango
SDW00120	Unknown	C10 H22 N2 O4	234.157	0.751332	Mango
SDW00121	Erucamide	C22 H43 N O	337.334	12.6795	Mango
SDW00122	N-Benzyl-3-(triisopropylsilyl)-N-[3-(triisopropylsilyl)-2-propyn-1-yl]-2-propyn-1-amine	C31 H53 N Si2	495.332	11.4887	Mango
SDW00125	2-Arachidonoyl glycerol	C23 H38 O4	378.274	11.6136	Mango
SDW00126	Unknown	C2 H5 F3 O P2	163.977	17.4486	Mango
SDW00127	Unknown	C25 H50 F N3 O7	523.363	11.8341	Mango
SDW00128	Unknown	unknown	124.032	16.9961	Mango
SDW00129	Vorinostat	C14 H20 N2 O3	264.147	3.95375	Mango
SDW00130	Unknown	C3 H2 O3 S	117.972	17.2476	Mango
SDW00131	Choline	C5 H13 N O	103.1	11.1591	Mango
SDW00132	2-methyl thieno[2,3-d]thiazole	C6 H5 N S2	154.967	17.2278	Mango
SDW00133	O-ureido-D-serine	C4 H9 N3 O4	162.011	0.199323	Mango
SDW00134	1-Linoleoyl-2-Hydroxy-sn-glycero-3-PC	C26 H50 N O7 P	519.332	10.7789	Mango
SDW00136	Pyrogallol	C6 H6 O3	126.032	1.22852	Mango
SDW00137	Tetrahydrofuran-2,3,4-triyl triacetate	C10 H14 O7	246.074	6.15118	Mango
SDW00138	Unknown	C18 H33 F5 N O3 P3	499.162	5.53725	Mango
SDW00139	Unknown	C3 H3 F3 O P2	173.962	18.3465	Mango
SDW00140	N-Nitro-1-nitroso-4,5-dihydro-1H-imidazol-2-amine	C3 H5 N5 O3	157.989	16.6365	Mango
SDW00141	Unknown	C5 H11 O6 P S2	261.974	16.5362	Mango
SDW00143	Unknown	C6 H6 F N2 O7 P	267.991	12.7729	Mango
SDW00144	MFCD00056310	C39 H68 O5	616.506	14.7792	Mango
SDW00145	Unknown	unknown	124.032	17.1974	Mango
SDW00146	Unknown	unknown	146.043	16.8165	Mango
SDW00147	1-Oxo-2,3-dihydro-1H-phospholium	C4 H6 O P	100.001	0.628505	Mango
SDW00148	D-(+)-Pyroglutamic Acid	C5 H7 N O3	129.043	1.27418	Mango
SDW00149	Unknown	C5 H14 F N4 P S	212.067	0.727637	Mango
SDW00150	Unknown	C4 H8 F2 O3 S2	205.987	17.3758	Mango
SDW00151	Furfural	C5 H4 O2	96.0216	0.83341	Mango
SDW00152	Cetrimonium	C19 H41 N	283.323	9.9433	Mango
SDW00153	Unknown	C21 H42 F N3 O7	467.3	10.4399	Mango
SDW00154	Unknown	C5 H10 F O3 P3	229.982	0.838081	Mango
SDW00155	Unknown	C5 H7 N2 O4 P	190.015	16.4559	Mango
SDW00157	3134	C7 H11 N S	142.012	0.642427	Mango
SDW00158	2-Mercaptoethanol	C2 H6 O S	78.0146	1.28204	Mango
SDW00160	Unknown	C3 H5 P S	103.985	9.15527	Mango
SDW00161	5-Hydroxymethyl-2-furaldehyde	C6 H6 O3	126.032	0.838647	Mango
SDW00162	Unknown	C16 H37 F N6 O3	380.29	12.401	Mango
SDW00164	Palmitic Acid	C16 H32 O2	273.266	8.44015	Mango
SDW00165	Unknown	C10 H6 F4 N2 O3	278.031	16.7467	Mango
SDW00166	1-oleoyl-2-linoleoyl-sn-glycerol	C39 H70 O5	618.521	15.523	Mango
SDW00167	Unknown	unknown	68.027	1.20775	Mango
SDW00168	Unknown	C36 H66 N2 O7	638.488	14.9057	Mango
SDW00169	Adenosine	C10 H13 N5 O4	267.096	2.33922	Mango
SDW00170	Choline	C5 H13 N O	103.1	11.8317	Mango
SDW00171	2-methyl thieno[2,3-d]thiazole	C6 H5 N S2	154.967	17.398	Mango
SDW00172	2,3-Dihydroxypropyl stearate	C21 H42 O4	358.308	11.9442	Mango
SDW00173	Unknown	C3 H3 F3 O P2	173.962	17.7439	Mango
SDW00174	Unknown	unknown	146.043	0.642512	Mango
SDW00175	Choline	C5 H13 N O	103.1	10.8753	Mango
SDW00176	Bisazir	C5 H12 N3 P S	178.033	0.639695	Mango
SDW00177	Unknown	unknown	68.0269	1.35592	Mango
SDW00178	Anisole	C7 H8 O	108.021	6.15149	Mango
SDW00179	Unknown	C2 H5 F3 O2 P2	179.971	16.5741	Mango
SDW00182	Unknown	C26 H41 N2 O5 P	492.273	4.99102	Mango
SDW00183	Unknown	C7 H4 F3 N4 O7 P	343.977	16.511	Mango
SDW00184	Unknown	C19 H31 N5 O9	473.21	0.981081	Mango
SDW00185	Unknown	C40 H66 N4 O	618.521	14.8473	Mango
SDW00186	Unknown	C20 H22 F4 N8 O S	498.158	5.46069	Mango
SDW00187	Unknown	C2 H5 F3 O2 P2	179.971	16.7587	Mango
SDW00188	Unknown	unknown	115.979	0.345725	Mango
SDW00189	Unknown	C4 H F O7	179.971	16.4185	Mango
SDW00190	DL-Glutamine	C5 H10 N2 O3	146.069	0.991912	Mango
SDW00191	Unknown	C7 H4 F O3 P	185.988	12.3431	Mango
SDW00192	Glycerophosphocholine	C8 H20 N O6 P	257.102	0.706462	Mango
SDW00193	Argininosuccinic acid	C10 H18 N4 O6	290.122	0.824102	Mango
SDW00194	Unknown	C11 H10 F3 O3 P	278.031	16.5601	Mango
SDW00195	MFCD00056310	C39 H68 O5	616.506	14.2579	Mango
SDW00196	Unknown	C19 H41 N3 O3	359.316	12.7125	Mango
SDW00197	MFCD00152656	C18 H37 N O3	315.277	9.37087	Mango
SDW00198	AB-005	C23 H32 N2 O	352.258	11.8748	Mango
SDW00199	Unknown	C39 H67 F3 O3	640.504	15.5248	Mango
SDW00200	Bisazir	C5 H12 N3 P S	176	17.037	Mango
SDW00201	Unknown	C3 H8 F N4 O P	166.042	16.9958	Mango
SDW00202	4-Amino-1,2,5-oxadiazole-3-carboxamide 2-oxide	C3 H4 N4 O3	144	0.15394	Mango
SDW00203	Unknown	C4 H2 F4 N2 S	185.988	12.7859	Mango
SDW00204	Cannabinol monomethyl ether	C22 H28 O2	302.222	11.7768	Mango
SDW00207	1-palmitoyl-3-linoleoylglycerol	C37 H68 O5	592.506	14.6973	Mango
SDW00208	Cardanolide	C23 H36 O2	344.271	11.8032	Mango
SDW00209	Unknown	unknown	124.032	17.3867	Mango
SDW00210	Cannabinol monomethyl ether	C22 H28 O2	324.204	11.7836	Mango
SDW00211	4-Methyl-3-(2-pyridyl)-4,5-dihydro-1H-1,2,4-triazole-5-thione	C8 H8 N4 S	192.048	0.639372	Mango
SDW00212	10,12-TRICOSADIYNOIC ACID	C23 H38 O2	346.287	12.1676	Mango
SDW00213	Unknown	unknown	80.0103	0.823936	Mango
SDW00214	NP-008882	C27 H48 O9	516.329	10.9033	Mango
SDW00215	Unknown	unknown	54.0476	0.812303	Mango
SDW00216	Unknown	unknown	115.979	0.625307	Mango
SDW00217	Unknown	C8 H11 F4 N3 O4	289.068	1.347	Mango
SDW00218	Unknown	C17 H17 F O9	384.084	1.25632	Mango
SDW00219	Unknown	C3 H5 N3 O2 P2	176.985	17.3531	Mango
SDW00220	Furfuranol	C5 H6 O2	98.0372	1.21502	Mango
SDW00221	7-Oxabicyclo[2.2.1]heptane-2,3-dicarboxylic acid	C8 H10 O5	186.053	6.12304	Mango
SDW00222	D-(+)-Proline	C5 H9 N O2	115.064	0.9792	Mango
SDW00223	Unknown	C26 H51 F3 N O5 P	545.345	11.807	Mango
SDW00224	Unknown	C3 H4 N4 O3 S	176	0.306154	Mango
SDW00225	Cardanolide	C23 H36 O2	344.271	11.6349	Mango
SDW00229	L-(-)-Methionine	C5 H11 N O2 S	132.024	0.911872	Mango
SDW00230	10,12-TRICOSADIYNOIC ACID	C23 H38 O2	346.287	11.9866	Mango
SDW00231	L-Histidine	C6 H9 N3 O2	155.069	1.23832	Mango
SDW00232	Unknown	unknown	148.005	16.4724	Mango
SDW00233	Unknown	unknown	146.043	0.330098	Mango
SDW00234	Unknown	unknown	97.9685	0.630002	Mango
SDW00235	Unknown	C29 H62 F3 N9	593.509	15.3461	Mango
SDW00236	Palmitic Acid	C16 H32 O2	273.266	8.29477	Mango
SDW00237	D-(+)-Proline	C5 H9 N O2	115.064	0.696964	Mango
SDW00238	Furfural	C5 H4 O2	96.0216	2.01084	Mango
SDW00239	Unknown	C6 H9 F3 N O P	199.037	1.01167	Mango
SDW00240	(+/-)5(6)-EET Ethanolamide	C22 H37 N O3	323.282	11.0858	Mango
SDW00241	Unknown	C22 H27 F3 N2 O4	440.194	7.20622	Mango
SDW00243	Choline	C5 H13 N O	103.1	10.7144	Mango
SDW00244	Oleamide	C18 H35 N O	281.271	11.6274	Mango
SDW00245	Levulinic acid	C5 H8 O3	116.048	1.19028	Mango
SDW00246	Bisazir	C5 H12 N3 P S	176	16.8508	Mango
SDW00247	Unknown	C4 H F O7	179.971	16.2029	Mango
SDW00249	2-Amino-4-methylpyrimidine	C5 H7 N3	92.0377	0.763665	Mango
SDW00250	Methylenesuccinate	C5 H4 O4	128.011	0.849606	Mango
SDW00251	Unknown	C3 H5 N2 O5 P	179.993	17.1701	Mango
SDW00252	Unknown	C3 H8 F N4 O P	166.042	17.354	Mango
SDW00253	Unknown	unknown	83.0377	17.0794	Mango
SDW00255	Choline	C5 H13 N O	103.1	10.4178	Mango
SDW00256	Adenine	C5 H5 N5	118.028	1.13737	Mango
SDW00258	Zearalenone	C18 H22 O5	278.151	9.86461	Mango
SDW00259	Unknown	C4 H7 Cl N2 O	134.025	0.626534	Mango
SDW00260	Unknown	C3 H5 N2 O5 P	179.993	16.9651	Mango
SDW00261	5-hydroxy-4-methoxy-5,6-dihydro-2H-pyran-2-one	C6 H8 O4	144.042	0.856278	Mango
SDW00262	Unknown	C3 H F N5 O3 P	204.98	17.8313	Mango
SDW00263	4-(2-Methyl-4-thiazolyl)phenol	C10 H9 N O S	191.04	2.52304	Mango
SDW00264	Acetamiprid-metabolite-IM-2-1	C9 H9 Cl N4	208.052	16.9582	Mango
SDW00265	Safingol	C18 H39 N O2	301.298	9.88529	Mango
SDW00266	3-Phenyl-1-propanol	C9 H12 O	118.042	1.11906	Mango
SDW00267	5-hydroxy-4-methoxy-5,6-dihydro-2H-pyran-2-one	C6 H8 O4	144.042	1.18731	Mango
SDW00268	Unknown	C7 H3 F3 N2 O9	315.978	16.6108	Mango
SDW00269	Unknown	unknown	613.475	14.8234	Mango
SDW00270	Unknown	unknown	68.027	0.840366	Mango
SDW00271	DL-Alanine	C3 H7 N O2	72.0217	0.834886	Mango
SDW00272	DL-Alanine	C3 H7 N O2	89.0482	0.837138	Mango
SDW00273	Unknown	C3 H6 F N4 P	148.032	17.1095	Mango
SDW00274	Unknown	unknown	71.0742	0.651166	Mango
SDW00275	4-Hydroxybenzaldehyde	C7 H6 O2	122.037	0.879346	Mango
SDW00276	Unknown	C5 H N2 O P	135.982	17.097	Mango
SDW00277	3-Fluorodihydro-2(3H)-furanone	C4 H5 F O2	104.063	2.28694	Mango
SDW00278	Unknown	C2 H2 N4 O S	129.994	0.316158	Mango
SDW00279	4033747	C26 H52 N O7 P	521.347	11.3327	Mango
SDW00280	Cannabinol monomethyl ether	C22 H28 O2	302.222	11.5253	Mango
SDW00282	Indole-3-lactic acid	C11 H11 N O3	205.074	4.75893	Mango
SDW00283	N6-Acetyl-L-lysine	C8 H16 N2 O3	171.089	0.810053	Mango
SDW00284	N6-Acetyl-L-lysine	C8 H16 N2 O3	188.116	0.767706	Mango
SDW00285	2-(14,15-Epoxyeicosatrienoyl) glycerol	C23 H38 O5	376.258	11.2715	Mango
SDW00286	1-O-(indol-3-ylacetyl)-beta-D-glucose	C16 H19 N O7	337.115	3.9785	Mango
SDW00287	Unknown	C5 H2 F6 N2 O4	267.991	12.4407	Mango
SDW00288	Unknown	C4 H3 F O S2	149.962	17.5342	Mango
SDW00289	Unknown	C4 H10 O9	202.032	0.639973	Mango
SDW00290	2-Oxobutyric acid	C4 H6 O3	102.032	1.22686	Mango
SDW00291	Unknown	C6 H F2 N6 O7 P	337.96	16.7978	Mango
SDW00292	Acetamiprid-metabolite-IM-2-1	C9 H9 Cl N4	208.052	17.151	Mango
SDW00293	Unknown	C5 H9 N2 O5 P	208.026	17.0198	Mango
SDW00294	Unknown	C3 H2 O3 S	117.972	16.8403	Mango
SDW00295	Unknown	C4 H10 N2 P2	148.031	16.9502	Mango
SDW00297	Unknown	C24 H42 N10 O3	518.345	11.3099	Mango
SDW00298	2-Aminooctadec-4-yne-1,3-diol	C18 H35 N O2	297.266	9.35495	Mango
SDW00299	Unknown	C8 H10 N2 O2 P2	228.021	17.1857	Mango
SDW00300	Cannabinol monomethyl ether	C22 H28 O2	324.204	11.5908	Mango
SDW00301	Unknown	C25 H51 F N2 O5 P2	540.327	11.4258	Mango
SDW00302	Unknown	C37 H71 F3 O3	620.537	16.3726	Mango
SDW00303	Unknown	C18 H29 N5 O9	459.194	0.833484	Mango
SDW00304	Isobutyraldehyde	C4 H8 O	72.0582	16.8125	Mango
SDW00305	Unknown	C16 H27 F2 N3 O3 P2 S	441.12	1.46943	Mango
SDW00306	NP-016582	C20 H35 N O	283.287	12.0613	Mango
SDW00307	Unknown	C6 H3 F3 N2 O8	287.983	16.6709	Mango
SDW00308	Unknown	C27 H49 F2 N2 O3 P	518.345	11.0829	Mango
SDW00311	Spermidine	C7 H19 N3	128.131	17.2714	Mango
SDW00312	Unknown	C5 H9 N2 O5 P	208.026	16.8452	Mango
SDW00313	Unknown	C3 H7 F3 O P2	177.993	16.8004	Mango
SDW00315	Unknown	C6 H3 F3 N2 O8	287.983	16.9047	Mango
SDW00316	5-Methanesulfonyl-1-methyl-1H-tetrazole	C3 H6 N4 O2 S	162.02	8.27846	Mango
SDW00317	Unknown	C38 H66 N4 O	594.522	16.1388	Mango
SDW00318	NP-008882	C27 H48 O9	516.329	10.697	Mango
SDW00319	2-Phenylglycine	C8 H9 N O2	151.063	1.19461	Mango
SDW00320	Unknown	unknown	96.0216	6.13028	Mango
SDW00321	Unknown	C19 H26 F2 N4 O3 P2	458.146	1.22592	Mango
SDW00322	Unknown	C29 H52 N2 O S3	540.327	11.1455	Mango
SDW00324	NP-008882	C27 H48 O9	516.329	10.9896	Mango
SDW00325	Zearalenone	C18 H22 O5	300.133	9.62588	Mango
SDW00326	Unknown	C7 H2 N6 O3	218.019	1.1381	Mango
SDW00328	2210	C12 H16 O2	190.964	0.377281	Mango
SDW00329	Unknown	unknown	130.998	16.914	Mango
SDW00330	Unknown	C6 H11 N4 P S	202.045	4.96097	Mango
SDW00331	4033747	C26 H52 N O7 P	521.348	11.0866	Mango
SDW00332	Unknown	C6 H13 F2 N2 P	182.079	0.690703	Mango
SDW00333	Unknown	unknown	86.0931	1.02213	Mango
SDW00335	Isobutyraldehyde	C4 H8 O	72.0582	16.6928	Mango
SDW00337	2-Amino-1,3,4-octadecanetriol	C18 H39 N O3	317.292	8.32339	Mango
SDW00338	Unknown	C3 H F N5 O3 P	204.98	0.295851	Mango
SDW00339	Unknown	C35 H67 F3 O3	592.506	15.0823	Mango
SDW00340	spermidine	C7 H19 N3	145.158	17.3978	Mango
SDW00341	2-Acetamidophenol	C8 H9 N O2	151.063	0.814055	Mango
SDW00342	Unknown	C20 H32 F2 N3 O7 P	495.194	0.903929	Mango
SDW00343	Unknown	C5 H9 N2 O5 P	208.026	16.6866	Mango
SDW00344	2210	C12 H16 O2	190.964	0.172921	Mango
SDW00346	Homo-L-arginine	C7 H16 N4 O2	188.127	0.749084	Mango
SDW00347	Unknown	C27 H44 F N3 O7	541.314	10.7787	Mango
SDW00348	Unknown	C38 H70 N2 P2	616.504	16.1808	Mango
SDW00349	2-methyl thieno[2,3-d]thiazole	C6 H5 N S2	154.967	18.3704	Mango
SDW00350	2-Amino-1,3,4-octadecanetriol	C18 H39 N O3	317.292	8.4778	Mango
SDW00351	Unknown	C5 H3 N4 O7 P	261.974	8.9453	Mango
SDW00352	Unknown	C26 H34 N2 O7 S	518.211	1.67597	Mango
SDW00353	Acetamiprid-metabolite-IM-2-1	C9 H9 Cl N4	208.052	17.3386	Mango
SDW00354	Unknown	C5 H5 F O S2	163.977	16.82	Mango
SDW00355	Unknown	unknown	97.9685	8.29268	Mango
SDW00356	Unknown	C6 H F2 N6 O7 P	337.96	16.4709	Mango
SDW00357	Unknown	C7 H4 F4 N2 O4 S	287.983	16.503	Mango
SDW00358	Unknown	C36 H71 O3 P S	614.488	15.009	Mango
SDW00359	Unknown	C17 H47 F2 N10 O P3	538.312	10.9278	Mango
SDW00360	Unknown	C4 H10 N2 P2	148.031	17.328	Mango
SDW00361	Xanthine	C5 H4 N4 O2	152.033	1.30107	Mango
SDW00362	Adenosine	C10 H13 N5 O4	267.096	2.21288	Mango
SDW00363	Unknown	C H3 F3 O P2	149.961	17.8124	Mango
SDW00364	N-Nitro-1-nitroso-4,5-dihydro-1H-imidazol-2-amine	C3 H5 N5 O3	157.989	0.626198	Mango
SDW00365	2-Phenylglycine	C8 H9 N O2	134.037	0.921758	Mango
SDW00366	Unknown	C25 H47 F2 N2 O3 P	492.329	11.2816	Mango
SDW00367	Unknown	unknown	129.994	0.626726	Mango
SDW00368	Unknown	C6 H3 N2 O P	149.998	17.0463	Mango
SDW00369	4-ethyl-5-(10H-phenothiazin-10-ylmethyl)-2,4-dihydro-3H-1,2,4-triazole-3-thione	C17 H16 N4 S2	324.105	0.817037	Mango
SDW00370	Unknown	C3 H7 F3 O P2	177.993	10.3625	Mango
SDW00371	Spermidine	C7 H19 N3	128.131	0.57903	Mango
SDW00372	Unknown	C2 H5 F3 O P2	163.977	17.9376	Mango
SDW00373	Unknown	C3 H6 Fe O3	143.971	17.1069	Mango
SDW00374	Acetophenone	C8 H8 O	120.058	1.05107	Mango
SDW00375	2-Acetamidophenol	C8 H9 N O2	151.063	0.881636	Mango
SDW00376	Unknown	C31 H62 F4 N4	566.49	15.0684	Mango
SDW00377	Unknown	C3 H8 N2 P2	134.016	0.378879	Mango
SDW00378	Unknown	C9 H2 F O6 P	255.957	16.7318	Mango
SDW00379	Unknown	unknown	83.0741	0.869693	Mango
SDW00380	Prolylleucine	C11 H20 N2 O3	228.147	0.946678	Mango
SDW00381	1H-Tetrazole-5-thiol	C H2 N4 S	102	17.0108	Mango
SDW00382	2-[1-[4,5-Dihydroxy-3-[(2S,3R,4S,5S,6R)-3,4,5-trihydroxy-6-(hydroxymethyl)oxan-2-yl]oxyoxan-2-yl]indol-3-yl]acetic acid	C21 H27 N O11	469.158	4.64962	Mango
SDW00383	Unknown	C3 H3 F2 N O6	186.993	17.1145	Mango
SDW00384	Glycerophospho-N-palmitoyl ethanolamine	C21 H44 N O7 P	453.285	10.9852	Mango
SDW00385	10-Undecenoic acid	C11 H20 O2	185.027	0.98268	Mango
SDW00386	Unknown	C2 H N2 O4 P	147.967	16.9904	Mango
SDW00387	Unknown	C17 H35 N3 O4	345.264	11.1257	Mango
SDW00388	Unknown	unknown	135.933	0.644287	Mango
SDW00390	D-(+)-Pyroglutamic Acid	C5 H7 N O3	129.043	0.71679	Mango
SDW00391	Unknown	unknown	86.0737	9.34602	Mango
SDW00392	Bisazir	C5 H12 N3 P S	176	0.626243	Mango
SDW00393	2-Acetamidophenol	C8 H9 N O2	151.063	1.02234	Mango
SDW00394	DIELAIDIN	C39 H72 O5	620.537	15.6274	Mango
SDW00395	5,6-dihydroxy-2-indolecarboxylic acid	C9 H7 N O4	193.037	4.8301	Mango
SDW00396	DL-Stachydrine	C7 H13 N O2	143.094	0.733115	Mango
SDW00397	1H-Tetrazole-5-thiol	C H2 N4 S	102	16.8204	Mango
SDW00398	Unknown	C5 H N6 O3 P S	255.957	16.913	Mango
SDW00399	2-(14,15-Epoxyeicosatrienoyl) glycerol	C23 H38 O5	376.258	11.0313	Mango
SDW00400	Unknown	C9 H2 F O6 P	255.957	16.5052	Mango
SDW00401	4033747	C26 H52 N O7 P	521.347	11.1996	Mango
SDW00402	Unknown	C3 H8 N2 P2	134.016	0.175216	Mango
SDW00403	Unknown	C6 H3 N3 O	133.028	0.626011	Mango
SDW00404	2210	C12 H16 O2	190.964	1.99665	Mango
SDW00405	spermidine	C7 H19 N3	145.158	0.594009	Mango
SDW00406	methyl 2-{[(1,3,3-trimethylbicyclo[2.2.1]hept-2-yl)amino]sulfonyl}benzoate	C18 H25 N O4 S	367.126	4.76017	Mango
SDW00408	Hexadecanamide	C16 H33 N O	255.256	11.4474	Mango
SDW00409	ACPC	C4 H7 N O2	101.048	0.699718	Mango
SDW00410	2,5-Dinitro-3,4-thiophenediamine	C4 H4 N4 O4 S	204.021	0.383321	Mango
SDW00411	Unknown	C33 H62 F6 O	588.472	15.0537	Mango
SDW00412	2-Amino-4-methylpyrimidine	C5 H7 N3	109.064	0.667425	Mango
SDW00413	Unknown	C17 H40 F N5 O S	381.293	12.3742	Mango
SDW00415	15-methylhexadecaphytosphingosine	C17 H37 N O3	303.277	9.32258	Mango
SDW00416	Isobutyraldehyde	C4 H8 O	72.0582	9.19172	Mango
SDW00420	2,1,3-Benzoxadiazole-5-carbonitrile 3-oxide	C7 H3 N3 O2	161.023	0.626236	Mango
SDW00421	Levulinic acid	C5 H8 O3	116.048	1.32114	Mango
SDW00422	(+)-Thienamycin	C11 H16 N2 O4 S	272.082	0.911688	Mango
SDW00423	Eplerenone	C24 H30 O6	414.204	8.86426	Mango
SDW00424	3-O-Isobutyryl-beta-D-fructofuranosyl 3-O-dodecanoyl-4-O-(3-methylbutanoyl)-alpha-D-glucopyranoside	C33 H58 O14	678.382	10.7257	Mango
SDW00425	Unknown	C33 H66 N6 O3	594.521	15.886	Mango
SDW00426	2,5-Dinitro-3,4-thiophenediamine	C4 H4 N4 O4 S	204.021	0.188756	Mango
SDW00427	4-Indolecarbaldehyde	C9 H7 N O	145.053	2.77579	Mango
SDW00428	Fenpropimorph	C20 H33 N O	281.271	11.4361	Mango
SDW00429	Dihydrothymine	C5 H8 N2 O2	128.059	0.749647	Mango
SDW00430	Pregnane-3,3-diol	C21 H36 O2	320.271	12.0779	Mango
SDW00431	5-(2-Nitroprop-1-enyl)-1,3-benzodioxole	C10 H9 N O4	207.053	3.81134	Mango
SDW00432	Unknown	C4 H3 F O S2	149.961	18.2891	Mango
SDW00433	Unknown	C7 H7 F N4 O7	278.031	16.9149	Mango
SDW00435	1-O-(indol-3-ylacetyl)-beta-D-glucose	C16 H19 N O7	337.115	4.64958	Mango
SDW00436	α-Eleostearic acid	C18 H30 O2	278.224	10.2002	Mango
SDW00437	Unknown	C3 H5 Fe N O3	156.967	1.07177	Mango
SDW00438	Unknown	unknown	133.987	17.0368	Mango
SDW00439	4-Guanidinobutyric acid	C5 H11 N3 O2	145.085	0.781544	Mango
SDW00440	D-(+)-Pyroglutamic Acid	C5 H7 N O3	129.043	1.05216	Mango
SDW00441	Unknown	C20 H42 N2 O	326.329	10.0506	Mango
SDW00442	Unknown	unknown	55.043	0.997972	Mango
SDW00443	Unknown	C6 H2 O4	137.995	0.850217	Mango
SDW00444	Unknown	C7 H8 N2 O3 P2 S	261.974	9.1605	Mango
SDW00445	Unknown	C6 H7 N4 O P S	214.009	0.996276	Mango
SDW00446	Unknown	C5 H10 F N2 O7 P	260.02	16.9019	Mango
SDW00447	LSD-d3	C20 H22 [2]H3 N3 O	304.237	12.1491	Mango
SDW00449	Unknown	C2 H5 N2 O2 P	120.009	0.642695	Mango
SDW00450	Unknown	C7 H7 F6 P S	267.991	8.97195	Mango
SDW00452	Pregabalin	C8 H17 N O2	159.126	0.902194	Mango
SDW00453	Unknown	unknown	83.0377	0.71391	Mango
SDW00454	D-(+)-Maltose	C12 H22 O11	342.116	4.93517	Mango
SDW00455	Unknown	C4 H4 Cl N4 O4 P3 S	331.886	0.691452	Mango
SDW00457	spermidine	C7 H19 N3	145.158	1.14558	Mango
SDW00458	(7E,13E)-9,15-dihydroxy-4,10,16-trimethyl-1,5,11-trioxacyclohexadeca-7,13-diene-2,6,12-trione	C16 H22 O8	342.131	6.00787	Mango
SDW00459	Stearic Hydrazide	C18 H38 N2 O	298.298	9.37518	Mango
SDW00460	Unknown	C18 H46 F N10 P3	514.311	11.2969	Mango
SDW00461	L-Ethionine	C6 H13 N O2 S	163.066	0.696772	Mango
SDW00462	4-(~13~C)Methylbenzoic acid	C7 [13]C H8 O2	137.056	0.99685	Mango
SDW00463	γ-Linolenic acid ethyl ester	C20 H34 O2	312.266	11.8974	Mango
SDW00464	Unknown	C25 H35 N O7 P2	523.19	0.952793	Mango
SDW00465	2-Quinolinecarboxylic acid	C10 H7 N O2	173.047	1.67608	Mango
SDW00466	2-Isopropyl-5-thieno[3,2-b]thiophen-2-yl-1,3,4-oxadiazole	C11 H10 N2 O S2	250.023	0.701128	Mango
SDW00467	4'-Chloro-2-hydroxyaurone	C15 H11 Cl O3	274.038	0.650942	Mango
SDW00468	Unknown	C2 H5 F3 O P2	163.977	17.7368	Mango
SDW00470	BMK methyl glycidate	C11 H12 O3	192.078	4.72281	Mango
SDW00471	methyl 4-oxo-4H-benzo[4,5]imidazo[2,1-b][1,3]thiazine-2-carboxylate	C12 H8 N2 O3 S	260.023	0.629477	Mango
SDW00473	Unknown	unknown	278.639	10.94	Mango
SDW00475	Unknown	C38 H66 N4 O	594.522	15.4431	Mango
SDW00476	Unknown	C3 H3 F3 O P2	173.961	0.33561	Mango
SDW00477	Unknown	C3 H7 F N4 S	150.038	0.641549	Mango
SDW00478	Epicatechin 5-O-beta-D-glucopyranoside-3-benzoate	C28 H28 O12	556.158	7.70693	Mango
SDW00479	4-Hydroxybenzaldehyde	C7 H6 O2	122.037	1.15903	Mango
SDW00480	Unknown	C17 H35 F2 N5 O2	379.277	11.66	Mango
SDW00481	Unknown	C6 H6 F N2 O7 P	267.991	11.9182	Mango
SDW00482	Unknown	unknown	133.987	16.828	Mango
SDW00483	Unknown	C6 H8 F2 O2 P2	211.997	16.5827	Mango
SDW00484	γ-Linolenic acid ethyl ester	C20 H34 O2	312.266	11.6361	Mango
SDW00485	ETFAA	C6 H7 F3 O3	184.035	8.29645	Mango
SDW00486	Unknown	C14 H18 F3 N O5	337.115	3.31776	Mango
SDW00487	NP-001346	C11 H15 N5 O3 S	297.089	4.23994	Mango
SDW00488	Sinapinic acid	C11 H12 O5	206.058	4.71535	Mango
SDW00489	Norepinephrine	C8 H11 N O3	169.074	1.05383	Mango
SDW00490	Pyridoxine	C8 H11 N O3	169.074	0.984608	Mango
SDW00491	Unknown	C15 H29 N O13	431.163	0.809893	Mango
SDW00492	Erucamide	C22 H43 N O	337.334	12.4902	Mango
SDW00494	Unknown	C5 H8 F N4 O P S	222.014	0.869869	Mango
SDW00495	Unknown	C2 H2 F N3 O2	119.013	0.62772	Mango
SDW00496	Unknown	C6 H8 F2 O2 P2	211.997	16.4001	Mango
SDW00497	Unknown	C2 H N2 O4 P	147.967	17.2042	Mango
SDW00498	Unknown	C8 H3 F3 N2	184.025	0.741272	Mango
SDW00499	5-guanidino-2-oxopentanoic acid	C6 H11 N3 O3	173.08	0.855774	Mango
SDW00500	Unknown	unknown	146.043	4.74097	Mango
SDW00501	Unknown	unknown	148.005	8.27267	Mango
SDW00502	BMK methyl glycidate	C11 H12 O3	192.078	5.23467	Mango
SDW00503	Unknown	C5 H5 F O8	211.997	16.7347	Mango
SDW00504	4033747	C26 H52 N O7 P	521.348	10.9641	Mango
SDW00505	Unknown	C7 H5 F N4 O6	260.02	16.7476	Mango
SDW00506	Unknown	C2 H3 F3 P2	145.966	0.138439	Mango
SDW00507	D-(+)-Maltose	C12 H22 O11	364.098	6.80212	Mango
SDW00509	Unknown	C4 H7 F3 O2 P2	205.987	16.8174	Mango
SDW00510	Unknown	C5 H N2 O P	135.982	17.2714	Mango
SDW00511	DL-Lysine	C6 H14 N2 O2	129.079	0.638445	Mango
SDW00512	Choline	C5 H13 N O	103.1	11.6901	Mango
SDW00513	Pregnane-3,3-diol	C21 H36 O2	320.271	11.8949	Mango
SDW00514	PPG n7	C21 H44 O8	424.297	12.2165	Mango
SDW00515	Unknown	C2 H5 F3 O P2	163.977	3.43873	Mango
SDW00516	Methyl (2R,4S,6S,12bR)-4-(4-fluorophenyl)-2-{[2-(4-morpholinyl)ethyl]amino}-1,2,3,4,6,7,12,12b-octahydroindolo[2,3-a]quinolizine-6-carboxylate	C29 H35 F N4 O3	484.282	10.9057	Mango
SDW00517	Unknown	C6 H11 N4 P S	202.045	0.734893	Mango
SDW00518	Unknown	unknown	278.639	10.7829	Mango
SDW00519	Unknown	C9 H14 N2 O3 P2	260.047	17.1325	Mango
SDW00520	Safingol	C18 H39 N O2	301.298	9.19333	Mango
SDW00521	leucoline	C9 H7 N	129.058	3.97854	Mango
SDW00522	Hippuric Acid	C9 H9 N O3	180.021	0.361935	Mango
SDW00523	Unknown	C18 H27 F3	300.206	11.4247	Mango
SDW00524	Unknown	unknown	90.0475	0.91378	Mango
SDW00525	Unknown	C19 H35 F N O3 P3 S	469.151	5.44174	Mango
SDW00526	Unknown	C6 H12 N2 O P2	190.042	16.942	Mango
SDW00527	Unknown	C11 H10 F N4 O10 P	408.011	0.975833	Mango
SDW00528	1-O-(indol-3-ylacetyl)-beta-D-glucose	C16 H19 N O7	337.115	3.76725	Mango
SDW00529	Unknown	C11 H5 F O4	220.017	0.664921	Mango
SDW00530	Unknown	unknown	52.0321	0.830906	Mango
SDW00531	Unknown	C10 H9 F4 N3 O3	295.058	0.671852	Mango
SDW00532	5,7-dihydroxy-6-methoxy-2-(4-{[(2S,3R,4S,5S,6R)-3,4,5-trihydroxy-6-(hydroxymethyl)oxan-2-yl]oxy}phenyl)-4H-chromen-4-one	C22 H22 O11	462.116	4.81712	Mango
SDW00533	Unknown	C19 H41 N O2 P2	377.262	11.2722	Mango
SDW00534	NP-005196	C15 H22 O5	264.136	4.43499	Mango
SDW00535	Unknown	unknown	69.0586	0.744368	Mango
SDW00536	D-Sphingosine	C18 H37 N O2	299.282	9.55156	Mango
SDW00537	Unknown	C15 H4 F2 N4 O5 P2	419.963	16.5862	Mango
SDW00538	Unknown	C24 H40 N5 O3 P	477.285	10.7929	Mango
SDW00539	Epicatechin 5-O-beta-D-glucopyranoside-3-benzoate	C28 H28 O12	556.157	7.87647	Mango
SDW00540	Prolylleucine	C11 H20 N2 O3	228.147	0.808258	Mango
SDW00541	Unknown	C12 H17 F5 O8	384.084	1.06276	Mango
SDW00542	Quinaprilat	C23 H26 N2 O5	410.183	7.14717	Mango
SDW00543	Unknown	C H3 N2 O3 P S	153.961	17.1264	Mango
SDW00544	Unknown	C5 H2 F6 N2 O4	267.991	9.18584	Mango
SDW00545	Unknown	C20 H41 F4 N3 O5	479.301	11.3503	Mango
SDW00546	(2E,2'E)-N,N'-1,4-Butanediylbis[3-(4-hydroxyphenyl)acrylamide]	C22 H24 N2 O4	380.173	7.07958	Mango
SDW00547	3345562	C10 H12 O6	228.063	6.15965	Mango
SDW00548	LSD-d3	C20 H22 [2]H3 N3 O	304.237	11.8839	Mango
SDW00549	[Similar to: NP-007553; ΔMass: -490.3468 Da]	C5 H7 N2 O4 P	190.015	8.31765	Mango
SDW00550	2-phenylthiazolidine-4-carboxylic acid	C10 H11 N O2 S	209.051	2.52233	Mango
SDW00551	Unknown	C H2 F3 N5 O S	188.993	16.928	Mango
SDW00552	Diethylpyrocarbonate	C6 H10 O5	162.053	1.18416	Mango
SDW00553	1-Myristoyl-2-hydroxy-sn-glycero-3-PE	C19 H40 N O7 P	425.253	10.4631	Mango
SDW00554	β-Alanine	C3 H7 N O2	89.0482	1.04568	Mango
SDW00555	Unknown	C18 H34 F N O15	523.189	1.10615	Mango
SDW00556	Anisole	C7 H8 O	108.021	0.835628	Mango
SDW00557	fosfocreatinine	C4 H8 N3 O4 P	193.025	0.715367	Mango
SDW00559	Unknown	C3 H5 Cl2 F N4	185.987	17.1243	Mango
SDW00560	Unknown	unknown	266.639	11.1888	Mango
SDW00561	NP-014287	C18 H32 O3	296.235	10.5616	Mango
SDW00562	Unknown	C19 H35 P S	326.219	11.9702	Mango
SDW00563	Unknown	C18 H34 F N O7 P2	457.179	0.804914	Mango
SDW00564	Unknown	C15 H25 F3 N2 O2	322.188	11.4255	Mango
SDW00565	Crotonic acid	C4 H6 O2	86.0373	1.23182	Mango
SDW00566	Unknown	C H3 N2 O3 P S	153.961	16.9431	Mango
SDW00568	Unknown	C5 H2 O3	110.001	0.850894	Mango
SDW00569	Lactamide	C3 H7 N O2	89.0482	0.743539	Mango
SDW00570	Unknown	C H3 N2 O3 P S	153.961	16.7129	Mango
SDW00571	Unknown	unknown	104.103	0.868769	Mango
SDW00572	Unknown	C22 H36 F2 N3 O3 P S2	523.19	0.869167	Mango
SDW00573	Unknown	C5 H10 N4 O4 S	222.041	16.9971	Mango
SDW00574	Pyracarbolid	C13 H15 N O2	217.11	3.53652	Mango
SDW00575	N-[(Benzyloxy)carbonyl]cysteine	C11 H13 N O4 S	255.056	1.03932	Mango
SDW00576	1,6-dihydroxycyclohexa-2,4-dienecarboxylic acid	C7 H8 O4	154.967	1.05656	Mango
SDW00577	1-oleoyl-2-linoleoyl-sn-glycerol	C39 H70 O5	618.521	15.2484	Mango
SDW00578	5-Bromo-2-chlorobenzoic acid	C7 H4 Br Cl O2	233.909	0.643624	Mango
SDW00580	Unknown	C H2 F3 N5 O S	188.993	17.1951	Mango
SDW00581	1-Linoleoyl glycerol	C21 H38 O4	354.276	10.7253	Mango
SDW00582	Unknown	C25 H38 F4 O2	446.279	12.1305	Mango
SDW00583	Unknown	C8 H16 N2 O2 P2	234.068	1.21167	Mango
SDW00584	5-Chloro-1,2,3,4-tetrafluoro-1,3-cyclopentadiene	C5 H Cl F4	172.953	0.12698	Mango
SDW00585	1,5-Naphthalenediamine	C10 H10 N2	141.058	2.77648	Mango
SDW00586	Unknown	C5 H9 N2 O5 P	208.026	16.5085	Mango
SDW00587	Unknown	C23 H36 F N7 O3	477.285	10.8898	Mango
SDW00588	Unknown	C8 H9 F6 N2 O5 P3	419.963	16.7568	Mango
SDW00589	Eplerenone	C24 H30 O6	414.204	8.71261	Mango
SDW00590	N-Nitro-1-nitroso-4,5-dihydro-1H-imidazol-2-amine	C3 H5 N5 O3	157.989	8.29142	Mango
SDW00591	Unknown	unknown	69.9739	17.0407	Mango
SDW00592	N-Butylbenzenesulfonamide	C10 H15 N O2 S	213.082	7.34214	Mango
SDW00593	DL-Alanine	C3 H7 N O2	89.0482	1.24218	Mango
SDW00594	Unknown	unknown	69.9739	16.8308	Mango
SDW00595	P-Benzylphosphonothioic diamide	C7 H11 N2 P S	185.987	16.8037	Mango
SDW00596	Unknown	C5 H10 F N2 O7 P	260.02	17.1003	Mango
SDW00597	NP-020521	C18 H32 O3	318.217	10.2017	Mango
SDW00599	Unknown	C25 H44 F N3 O7	517.316	10.3974	Mango
SDW00600	Unknown	C9 H11 F5 O7 P2 S	419.963	16.3884	Mango
SDW00602	Ethyl 3-{[2-(aminocarbonyl)-3-thienyl]amino}-3-oxopropanoate	C10 H12 N2 O4 S	278.031	8.30129	Mango
SDW00603	Unknown	C7 H6 F N4 O5 P	276.006	1.04541	Mango
SDW00604	7-Methoxy-4H-chromen-4-one	C10 H8 O3	176.047	3.96756	Mango
SDW00605	Unknown	unknown	80.0268	1.2075	Mango
SDW00606	Unknown	C35 H70 N2 O10	678.503	7.1133	Mango
SDW00607	Unknown	C H2 N6 O2 P2	191.972	0.176074	Mango
SDW00608	Furfuranol	C5 H6 O2	98.0372	17.4307	Mango
SDW00610	Unknown	C2 H3 N2 O5 P	165.978	17.2617	Mango
SDW00611	P-Benzylphosphonothioic diamide	C7 H11 N2 P S	185.988	9.2008	Mango
SDW00613	Unknown	unknown	87.9843	17.0311	Mango
SDW00614	Felbamate	C11 H14 N2 O4	238.095	0.898822	Mango
SDW00615	Hippuric Acid	C9 H9 N O3	180.021	1.98684	Mango
SDW00616	8-Hydroxy-7-nitroso-5-quinolinesulfonic acid	C9 H6 N2 O5 S	255.121	0.883744	Mango
SDW00617	ETHYL 2-(HYDROXYIMINO)-6-NITROHEXANOATE	C8 H14 N2 O5	219.11	2.36039	Mango
SDW00618	Xanthine	C5 H4 N4 O2	152.033	0.989389	Mango
SDW00619	Unknown	C18 H45 N10 O4 P	496.335	11.3757	Mango
SDW00620	1H-Tetrazole-5-thiol	C H2 N4 S	102	16.665	Mango
SDW00621	Unknown	C5 H2 F6 N2 O4	267.991	13.7058	Mango
SDW00622	Unknown	C10 H23 N4 O2 P3	324.105	0.749752	Mango
SDW00623	Unknown	C15 H36 F N5 O S	353.262	11.4882	Mango
SDW00624	Unknown	C33 H73 F N7 O7 P	729.53	13.5723	Mango
SDW00625	Unknown	C H F3 N O2 P	146.97	17.1041	Mango
SDW00626	2-Oxobutyric acid	C4 H6 O3	102.032	1.91259	Mango
SDW00627	1,1'-Oxybis[3-(ethylamino)-2-propanol]	C10 H24 N2 O3	220.178	0.734787	Mango
SDW00628	Unknown	C2 H3 F4 N2 O P	177.993	16.5647	Mango
SDW00629	Unknown	unknown	79.0179	1.01245	Mango
SDW00630	Unknown	unknown	59.0492	12.0827	Mango
SDW00632	Unknown	C H N2 O3 P	119.972	16.9402	Mango
SDW00633	1-benzylimidazole	C10 H10 N2	158.084	2.77011	Mango
SDW00634	2-morpholinoacetic acid	C6 H11 N O3	145.074	0.818872	Mango
SDW00635	Phosphoric acid	H3 O4 P	97.9773	0.995637	Mango
SDW00636	MONOLINOLENIN	C21 H36 O4	352.261	11.0321	Mango
SDW00637	Unknown	C5 H10 Cl F2 N2 O P	218.018	1.46308	Mango
SDW00639	D-(+)-Maltose	C12 H22 O11	342.116	1.0145	Mango
SDW00641	Unknown	unknown	87.9617	17.1187	Mango
SDW00643	L-Proline	C5 H9 N O2	115.064	17.0664	Mango
SDW00644	Unknown	C5 H10 N4 O4 S	222.041	16.841	Mango
SDW00645	Unknown	unknown	80.0268	6.14831	Mango
SDW00646	alpha-Ketoglutaric acid	C5 H6 O5	146.021	0.848968	Mango
SDW00647	Unknown	C2 H3 F3 P2	145.966	16.6071	Mango
SDW00648	Indole	C8 H7 N	117.058	2.77614	Mango
SDW00649	leucoline	C9 H7 N	129.058	4.6589	Mango
SDW00650	NP-016582	C20 H35 N O	305.269	12.2543	Mango
SDW00652	Unknown	C36 H65 N O3	559.496	13.3994	Mango
SDW00653	1,5-Isoquinolinediol	C9 H7 N O2	161.047	3.48951	Mango
SDW00655	Unknown	C24 H46 F4 N O7 P3 S	661.215	4.74091	Mango
SDW00656	Unknown	C10 H15 F N2 O3 P2	292.055	0.737054	Mango
SDW00657	Unknown	unknown	138.047	16.9526	Mango
SDW00658	Unknown	C8 H10 F N4 O3 P	260.047	16.9822	Mango
SDW00659	Unknown	unknown	138.047	16.9297	Mango
SDW00660	Unknown	C4 H4 F2 N6 O	190.042	17.3263	Mango
SDW00661	7-Oxabicyclo[2.2.1]heptane-2,3-dicarboxylic acid	C8 H10 O5	186.053	5.88652	Mango
SDW00662	Unknown	unknown	68.027	1.99634	Mango
SDW00663	Unknown	C19 H48 F2 N8 O2 P2	520.335	10.7775	Mango
SDW00664	Unknown	C6 H2 F4 N2 O4 S	273.967	16.7354	Mango
SDW00665	D-(+)-Glucose	C6 H12 O6	197.09	1.14195	Mango
SDW00666	Unknown	unknown	118.012	1.70936	Mango
SDW00667	Unknown	C28 H49 F4 N O3	523.363	11.5479	Mango
SDW00668	Schaftoside	C26 H28 O14	564.147	5.77966	Mango
SDW00669	Unknown	C5 H5 N3 O5 S	218.996	17.248	Mango
SDW00671	D-Sphingosine	C18 H37 N O2	299.282	9.71489	Mango
SDW00672	7-Nitroquinazoline	C8 H5 N3 O2	175.038	0.567194	Mango
SDW00673	Unknown	C8 H10 N2 O5 P2	276.006	1.29569	Mango
SDW00674	Unknown	C4 H5 N2 O2 P S	175.982	0.873935	Mango
SDW00675	Unknown	C7 H6 F4 N2	194.046	16.9797	Mango
SDW00676	7-Methoxy-4H-chromen-4-one	C10 H8 O3	176.047	4.51542	Mango
SDW00677	N-Formyl-L-methionyl-L-methionine	C11 H20 N2 O4 S2	308.087	0.822831	Mango
SDW00678	Unknown	unknown	68.0269	1.01939	Mango
SDW00679	Unknown	C3 H3 F3 O P2	173.961	0.520756	Mango
SDW00680	1-Linoleoyl glycerol	C21 H38 O4	354.276	10.9858	Mango
SDW00681	Unknown	C20 H39 F4 N4 O4 P	506.264	12.0069	Mango
SDW00682	Unknown	C7 H10 N2 O4 S	218.037	17.1571	Mango
SDW00683	Unknown	C3 H5 N2 O P	116.014	0.643117	Mango
SDW00684	Unknown	C H F3 P2	131.951	0.131614	Mango
SDW00685	DIELAIDIN	C39 H72 O5	620.537	16.0656	Mango
SDW00686	ACETYL PROLINE	C7 H11 N O3	157.074	1.69628	Mango
SDW00688	Unknown	C38 H70 F N3 O8	715.514	14.1118	Mango
SDW00689	Spermidine	C7 H19 N3	128.131	0.880816	Mango
SDW00690	(5R)-3-[(1R)-1-Hydroxyoctyl]-5-methyl-2(5H)-furanone	C13 H22 O3	226.084	4.73874	Mango
SDW00691	5-Hydroxyindole-3-acetic acid	C10 H9 N O3	191.058	4.62669	Mango
SDW00693	C20 sphinganine	C20 H43 N O2	329.329	9.85565	Mango
SDW00694	Unknown	C6 H3 N2 O P	149.998	10.5606	Mango
SDW00695	NP-008993	C18 H34 O4	314.245	9.57391	Mango
SDW00696	Lauryldimethylamine oxide	C14 H31 N O	229.24	8.5682	Mango
SDW00697	Unknown	C17 H26 N8 O4	406.207	11.7818	Mango
SDW00698	NP-005196	C15 H22 O5	264.136	5.18667	Mango
SDW00699	Choline	C5 H13 N O	103.1	4.8481	Mango
SDW00700	[Similar to: Escaline; ΔMass: -105.1360 Da]	C2 H6 N2 P2	120	1.69371	Mango
SDW00701	Acetophenone	C8 H8 O	120.058	0.879067	Mango
SDW00702	Unknown	C4 H4 N3 O4 P	188.993	9.15011	Mango
SDW00703	Adenine	C5 H5 N5	135.054	2.32368	Mango
SDW00704	sulfadicramide	C11 H14 N2 O3 S	254.072	2.98572	Mango
SDW00705	Unknown	C5 H7 N2 O4 P	190.015	0.203727	Mango
SDW00706	Sinapinic acid	C11 H12 O5	224.068	4.7151	Mango
SDW00707	Unknown	C11 H22 F O6 P3	362.061	0.85256	Mango
SDW00708	Coenzyme Q2	C19 H26 O4	318.187	11.7644	Mango
SDW00709	Methyl (2R,4S,6S,12bR)-4-(4-fluorophenyl)-2-{[2-(4-morpholinyl)ethyl]amino}-1,2,3,4,6,7,12,12b-octahydroindolo[2,3-a]quinolizine-6-carboxylate	C29 H35 F N4 O3	506.264	10.8043	Mango
SDW00710	Unknown	C2 H4 F N3 O7 S	232.975	0.434365	Mango
SDW00712	1-Octen-3-yne	C8 H12	108.021	5.87487	Mango
SDW00713	Unknown	C7 H7 F N4 O7	278.031	17.0559	Mango
SDW00714	[Similar to: 2-aminoethyl (allylamino)methanedithioate hydrochloride; ΔMass: -28.0395 Da]	unknown	148.005	0.358297	Mango
SDW00715	1-AMINOCYCLOPROPYLPHOSPHONATE	C3 H6 N O3 P	135.009	0.624066	Mango
SDW00716	C2 Dihydroceramide	C20 H41 N O3	343.308	10.2473	Mango
SDW00717	Glutaric anhydride	C5 H6 O3	114.032	1.20214	Mango
SDW00718	Sinapinic acid	C11 H12 O5	206.058	6.6065	Mango
SDW00719	Unknown	C36 H51 F5 N2 O3	654.382	11.0367	Mango
SDW00720	(1S,4aS,7aS)-7-({[(2E)-3-phenylprop-2-enoyl]oxy}methyl)-1-{[(2S,3R,4S,5S,6R)-3,4,5-trihydroxy-6-(hydroxymethyl)oxan-2-yl]oxy}-1H,4aH,5H,7aH-cyclopenta[c]pyran-4-carboxylic acid	C25 H28 O11	504.168	0.815332	Mango
SDW00721	D(+)-Galactosamine	C6 H13 N O5	179.079	1.15893	Mango
SDW00722	Unknown	unknown	87.9843	16.849	Mango
SDW00723	O-Arachidonoyl ethanolamine	C22 H37 N O2	325.298	11.5629	Mango
SDW00724	Unknown	C2 H3 F3 P2	145.966	0.521148	Mango
SDW00725	Unknown	C19 H38 N7 O5 P	475.269	10.43	Mango
SDW00726	Fluopyram	C16 H11 Cl F6 N2 O	396.048	1.09948	Mango
SDW00727	Unknown	C5 H6 N4 O4 S	218.01	16.7596	Mango
SDW00728	1-(3-hydroxy-3-methylpent-4-en-1-yl)-2,5,5,8a-tetramethyl-decahydronaphthalen-2-ol	C20 H36 O2	308.271	12.4073	Mango
SDW00729	Unknown	C9 H20 F3 N6 O3 P	348.127	0.809044	Mango
SDW00730	Unknown	C5 H6 F3 P S	185.988	7.96884	Mango
SDW00731	Unknown	C7 H6 N4 O4 S	242.01	16.916	Mango
SDW00732	1H-Tetrazole-5-thiol	C H2 N4 S	102	16.4217	Mango
SDW00733	Unknown	C5 H7 F3 N2 O10 S	343.977	8.92961	Mango
SDW00735	1-(3-hydroxy-3-methylpent-4-en-1-yl)-2,5,5,8a-tetramethyl-decahydronaphthalen-2-ol	C20 H36 O2	308.271	12.6926	Mango
SDW00736	DI3050000	C7 H3 Cl N2 O2	181.989	17.0245	Mango
SDW00737	Unknown	C17 H35 N4 O3 P	374.243	11.0244	Mango
SDW00738	Unknown	C34 H67 F O6	590.49	14.5562	Mango
SDW00739	Unknown	C11 H21 F3 N3 O2 P	315.131	0.917798	Mango
SDW00740	Unknown	unknown	80.0268	0.735701	Mango
SDW00742	Sotrastaurin	C25 H22 N6 O2	437.231	5.99768	Mango
SDW00744	2,6-Dimethyl-4,10-dioxatricyclo[5.2.1.0~2,6~]decane-3,5-dione	C10 H12 O4	196.073	4.4057	Mango
SDW00745	Unknown	C32 H68 F3 N5 O4	643.523	16.3104	Mango
SDW00746	C16 phytosphingosine	C16 H35 N O3	289.261	8.67238	Mango
SDW00747	Unknown	C11 H6	138.047	17.2855	Mango
SDW00748	Oleamide	C18 H35 N O	281.271	11.7982	Mango
SDW00749	Unknown	C2 H5 F3 O P2	163.977	3.11505	Mango
SDW00750	Unknown	unknown	118.012	1.40039	Mango
SDW00751	Cannabinol monomethyl ether	C22 H28 O2	324.204	11.9697	Mango
SDW00752	Unknown	C2 H2 F3 O3 P	161.97	17.1173	Mango
SDW00753	NP-008993	C18 H34 O4	336.227	9.5697	Mango
SDW00754	Unknown	C20 H33 F N4 O5	428.244	11.664	Mango
SDW00755	Unknown	unknown	103.956	0.0467349	Mango
SDW00756	BAY 11-7082	C10 H9 N O2 S	207.035	2.43008	Mango
SDW00757	Unknown	C3 H8 Fe O4	161.982	17.1383	Mango
SDW00758	Unknown	C40 H73 F O P2	650.511	12.7012	Mango
SDW00759	Unknown	unknown	133.987	16.6007	Mango
SDW00760	Unknown	C2 H4 F2 O7	177.993	10.7012	Mango
SDW00761	2-(Cyclohexylmethylidene)-1,2,3,4-tetrahydronaphthalen-1-one	C17 H20 O	240.147	0.918616	Mango
SDW00762	Unknown	unknown	87.9843	16.6964	Mango
SDW00763	spermidine	C7 H19 N3	145.158	0.914321	Mango
SDW00765	Unknown	unknown	275.645	11.2156	Mango
SDW00766	Unknown	C39 H70 F3 N5 O3	713.543	12.9951	Mango
SDW00767	Unknown	unknown	409.754	13.8324	Mango
SDW00768	trans-Aconitic acid	C6 H6 O6	174.016	0.850104	Mango
SDW00769	6-Methylquinoline	C10 H9 N	143.073	2.77443	Mango
SDW00770	α-Lactose	C12 H22 O11	342.115	0.786276	Mango
SDW00771	Unknown	C36 H62 F3 N O	581.478	13.4404	Mango
SDW00773	Unknown	C37 H67 F O2	562.511	15.8631	Mango
SDW00774	Unknown	C4 H7 F2 N O S2	186.993	17.2744	Mango
SDW00775	Octyl decyl phthalate	C26 H42 O4	440.29	12.7037	Mango
SDW00776	valinol	C5 H13 N O	103.1	13.3406	Mango
SDW00778	Unknown	C26 H53 F N6 O13	676.364	10.8938	Mango
SDW00779	Unknown	C4 H10 N4 O3 S	194.046	16.8022	Mango
SDW00780	7-Oxabicyclo[2.2.1]heptane-2,3-dicarboxylic acid	C8 H10 O5	186.053	5.6808	Mango
SDW00782	Clofilium	C21 H36 Cl N	337.259	9.39188	Mango
SDW00783	Unknown	unknown	59.0492	12.6302	Mango
SDW00784	methyl 4-methyl-2-oxo-2H-pyran-6-carboxylate	C8 H8 O4	168.042	6.15098	Mango
SDW00785	[Similar to: 2-{2-[(2Z)-pent-2-en-1-yl]-3-{[3,4,5-trihydroxy-6-(hydroxymethyl)oxan-2-yl]oxy}cyclopentyl}acetic acid; ΔMass: -242.2431 Da]	C H F3 P2	131.951	0.301197	Mango
SDW00786	Unknown	C5 H6 N4 O4 S	218.01	17.0423	Mango
SDW00787	Unknown	unknown	101.999	0.628969	Mango
SDW00788	1-Hexadecanoylpyrrolidine	C20 H39 N O	309.303	12.1823	Mango
SDW00791	4-{5-[(4-methylphenyl)methylene]-4-oxo-2-thioxo-1,3-thiazolan-3-yl}-N-(1,3-thiazol-2-yl)benzenesulfonamide	C20 H15 N3 O3 S4	336.164	0.74078	Mango
SDW00792	2-Phenylglycine	C8 H9 N O2	151.063	1.50446	Mango
SDW00794	Unknown	C2 H6 Fe O2	115.977	17.0868	Mango
SDW00796	3-Bromo-2-methyl-2-cyclohexen-1-one	C7 H9 Br O	187.984	16.8662	Mango
SDW00797	1,1'-(4H,8H-Bis[1,2,5]oxadiazolo[3,4-b:3',4'-e]pyrazine-4,8-diyl)diethanone	C8 H6 N6 O4	250.045	0.765794	Mango
SDW00799	Unknown	C14 H29 N7	295.248	8.54496	Mango
SDW00800	Unknown	unknown	88.1005	0.627726	Mango
SDW00801	4-Hydroxy-5-methyl-3(2H)-thiophenone	C5 H6 O2 S	130.009	0.904612	Mango
SDW00802	Unknown	unknown	144.97	0.633958	Mango
SDW00803	Unknown	C22 H37 F N6 O5	484.281	11.8862	Mango
SDW00804	Unknown	C4 H4 F2 N4 P2	207.988	17.0287	Mango
SDW00805	Asparagine	C4 H8 N2 O3	115.027	0.74047	Mango
SDW00807	Unknown	C3 H F3 N4 O S	197.981	16.5929	Mango
SDW00808	D-(+)-Maltose	C12 H22 O11	364.098	0.820299	Mango
SDW00809	Unknown	C3 H8 N2 O3 S	152.026	0.300184	Mango
SDW00810	Kuromanin	C21 H20 O11	448.1	4.36964	Mango
SDW00811	ANHYDROMETHYLENECITRIC ACID	C7 H8 O7	242.012	0.650452	Mango
SDW00812	Unknown	C4 H7 O P S	133.995	9.14633	Mango
SDW00815	Unknown	C6 H6 F N2 O7 P	267.991	14.0367	Mango
SDW00816	Cetrimonium	C19 H41 N	283.324	10.3835	Mango
SDW00817	Unknown	C5 H8 F N2 O2 P	178.03	17.0432	Mango
SDW00818	N-(4-Cyclohexylphenyl)thiourea	C13 H18 N2 S	212.141	8.11642	Mango
SDW00819	1-Linoleoyl glycerol	C21 H38 O4	336.266	11.0582	Mango
SDW00820	Unknown	C2 H6 F2 N4 S	156.028	0.823257	Mango
SDW00821	Unknown	C6 H9 N2 O3 P	188.036	1.22302	Mango
SDW00822	Unknown	C13 H31 N3 O3	277.238	11.4615	Mango
SDW00823	Unknown	C H F3 N O2 P	146.97	17.275	Mango
SDW00824	γ-Linolenic acid ethyl ester	C20 H34 O2	312.266	11.3936	Mango
SDW00826	Unknown	C31 H64 F3 N4 O2 P	612.472	14.4719	Mango
SDW00827	6-Methylindole	C9 H9 N	114.047	2.77841	Mango
SDW00828	Daucosterol	C35 H60 O6	576.438	13.346	Mango
SDW00829	Unknown	C7 H3 F N4 O5 P2	303.955	16.7195	Mango
SDW00830	Unknown	unknown	266.639	11.0268	Mango
SDW00831	Unknown	C39 H67 F3 O3	640.504	15.8522	Mango
SDW00832	Unknown	C21 H41 F N2 O9	484.28	12.1454	Mango
SDW00833	Unknown	C30 H23 F2 N2 O6 P	576.126	10.1751	Mango
SDW00834	Unknown	C3 H3 F3 O P2	173.962	10.5392	Mango
SDW00836	3-Bromo-2-methyl-2-cyclohexen-1-one	C7 H9 Br O	187.984	17.1189	Mango
SDW00837	Asparagine	C4 H8 N2 O3	132.053	0.829965	Mango
SDW00838	Unknown	C41 H79 F N O4 P S	731.545	13.9457	Mango
SDW00839	Unknown	unknown	113.94	17.1612	Mango
SDW00840	Unknown	C21 H36 F2 N2 O5	434.261	11.6382	Mango
SDW00841	Sulfamethoxypyridazine	C11 H12 N4 O3 S	280.063	1.28186	Mango
SDW00842	N-(2,4-Dichlorophenyl)-N-ethyl-6-methoxy-4-(trifluoromethyl)nicotinamide	C16 H13 Cl2 F3 N2 O2	392.035	0.818704	Mango
SDW00843	Unknown	C38 H78 F4 N3 P S	715.559	13.3811	Mango
SDW00844	Unknown	C5 H5 N3 O2 P2	200.985	17.2222	Mango
SDW00847	Unknown	C2 H7 N O2 S3	172.964	0.633911	Mango
SDW00848	Unknown	C H N2 O3 P	119.972	17.1413	Mango
SDW00849	Unknown	C38 H76 F4 N3 P S	713.543	13.1798	Mango
SDW00850	Unknown	unknown	148.005	0.622974	Mango
SDW00851	1-Linoleoyl glycerol	C21 H38 O4	336.266	11.2692	Mango
SDW00852	Difluoromalonic acid	C3 H2 F2 O4	138.994	17.0174	Mango
SDW00853	(-)-Epicatechin	C15 H14 O6	290.078	3.90242	Mango
SDW00854	4-(3,4-Difluorophenyl)-4'-propyl-1,1'-bi(cyclohexan)-3-ene	C21 H28 F2	318.217	10.543	Mango
SDW00855	Unknown	C7 H10 F2 N2 O4	224.062	2.5245	Mango
SDW00856	Unknown	C5 H F3 N4 S	205.987	3.11342	Mango
SDW00858	Unknown	C2 H5 Cl2 N O2	144.97	17.0925	Mango
SDW00859	2-[1-[4,5-Dihydroxy-3-[(2S,3R,4S,5S,6R)-3,4,5-trihydroxy-6-(hydroxymethyl)oxan-2-yl]oxyoxan-2-yl]indol-3-yl]acetic acid	C21 H27 N O11	469.158	4.09743	Mango
SDW00860	Methyl dimethylphosphoramidocyanidate	C4 H9 N2 O2 P	148.04	0.642537	Mango
SDW00862	Unknown	unknown	130.998	16.428	Mango
SDW00863	NP-016582	C20 H35 N O	283.287	11.886	Mango
SDW00865	Unknown	C4 H8 F N4 O2 P	194.037	0.18967	Mango
SDW00866	Unknown	C H2 F2 N3 P S	156.967	17.1791	Mango
SDW00867	D-Glucosamine	C6 H13 N O5	179.079	1.3229	Mango
SDW00868	NP-013179	C26 H32 O5	462.176	7.11631	Mango
SDW00869	Fluopyram	C16 H11 Cl F6 N2 O	396.048	1.37081	Mango
SDW00870	Unknown	C17 H37 N3 O3	331.285	12.1697	Mango
SDW00871	Unknown	unknown	62.9912	0.85864	Mango
SDW00873	Unknown	C9 H20 F4 N3 P S	309.105	0.803151	Mango
SDW00874	Unknown	C9 H15 F P2	204.063	6.12389	Mango
SDW00875	1-O-palmitoyl-N-acetylsphingosine	C36 H69 N O4	579.522	13.4215	Mango
SDW00876	Coenzyme Q2	C19 H26 O4	318.187	11.5254	Mango
SDW00877	Unknown	C2 H6 N2 P2	120	0.365731	Mango
SDW00878	Unknown	unknown	409.754	13.619	Mango
SDW00879	Unknown	C7 H14 F3 O4 P3 S	343.977	9.18262	Mango
SDW00881	Unknown	C4 H10 N4 O3 S	194.046	16.6596	Mango
SDW00882	ACPC	C4 H7 N O2	101.048	0.918369	Mango
SDW00883	D(+)-Galactosamine	C6 H13 N O5	162.053	0.763613	Mango
SDW00884	Linoleamide	C18 H33 N O	279.256	9.35533	Mango
SDW00885	(R)-() homocitric acid lactone	C7 H8 O6	187.084	0.919745	Mango
SDW00886	Adenosine 5'-monophosphate	C10 H14 N5 O7 P	347.062	0.885323	Mango
SDW00887	Unknown	C18 H34 F N O7	395.23	7.09216	Mango
SDW00888	Levulinic acid	C5 H8 O3	116.048	0.877155	Mango
SDW00889	7-Methoxy-4H-chromen-4-one	C10 H8 O3	176.047	5.02245	Mango
SDW00890	5-[(Z)-Pentadec-8-enyl]benzene-1,3-diol	C21 H34 O2	318.255	11.4379	Mango
SDW00892	Unknown	C3 H2 O3 S	117.972	16.6211	Mango
SDW00896	Prolylleucine	C11 H20 N2 O3	228.147	1.25139	Mango
SDW00897	Unknown	C2 H5 F3 O P2	163.977	0.116998	Mango
SDW00898	Unknown	C H2 F2 N3 P S	156.967	17.001	Mango
SDW00899	Unknown	C19 H19 N5 O8	445.121	2.27996	Mango
SDW00900	Unknown	C3 H2 N3 O4 P	174.978	1.16317	Mango
SDW00901	2-Phenylglycine	C8 H9 N O2	151.063	10.1001	Mango
SDW00902	Unknown	C14 H18 F3 N O5	337.115	4.16562	Mango
SDW00903	Unknown	C23 H20 N10	436.185	8.6131	Mango
SDW00904	Adenine	C5 H5 N5	135.054	2.15952	Mango
SDW00905	3'-Methoxypongapin	C20 H14 O7	366.074	1.41243	Mango
SDW00906	3-[(15Z,19Z)-11,12-Dihydroxy-15,19-dotriacontadien-1-yl]-5-methyl-2(5H)-furanone	C37 H66 O4	574.495	15.3143	Mango
SDW00907	N-{4-[(2R,3R)-3-(Hydroxymethyl)-5-oxo-2-morpholinyl]phenyl}methanesulfonamide	C12 H16 N2 O5 S	300.084	2.82065	Mango
SDW00908	Unknown	C4 H9 F N4 S	164.053	0.639352	Mango
SDW00910	11-piperidino-2,3-dihydro-1H-cyclopenta[4,5]pyrido[1,2-a]benzimidazole-4-carbonitrile	C20 H20 N4	316.171	11.4248	Mango
SDW00911	Unknown	C3 H2 O5 S	149.962	16.9874	Mango
SDW00912	Unknown	C40 H61 F3 N4	654.483	13.046	Mango
SDW00913	2-(2-Heptadecyl-2-imidazolin-1-yl)ethanol	C22 H44 N2 O	352.345	10.1995	Mango
SDW00914	Unknown	C3 H F3 N4 O S	197.981	16.4411	Mango
SDW00915	Unknown	C20 H33 F3	330.252	12.6905	Mango
SDW00916	1-(3-hydroxy-3-methylpent-4-en-1-yl)-2,5,5,8a-tetramethyl-decahydronaphthalen-2-ol	C20 H36 O2	330.253	12.8426	Mango
SDW00917	Unknown	C2 H N3 O4 S	162.969	0.165297	Mango
SDW00918	1913256	C18 H30 O	262.229	10.7202	Mango
SDW00919	Unknown	C37 H64 N2 O3	584.492	15.8986	Mango
SDW00920	1913256	C18 H30 O	262.229	11.3812	Mango
SDW00921	Skatole	C9 H9 N	131.073	2.73287	Mango
SDW00922	5'-O-beta-D-Glucosylpyridoxine	C14 H21 N O8	331.126	0.917291	Mango
SDW00923	DL-Tryptophan	C11 H12 N2 O2	408.179	2.77545	Mango
SDW00924	Unknown	C16 H24 N3 P S3	385.088	1.31842	Mango
SDW00925	Linoleamide	C18 H33 N O	279.256	11.202	Mango
SDW00926	Unknown	unknown	68.027	0.140788	Mango
SDW00927	Unknown	C H N4 P S3	195.91	17.1102	Mango
SDW00928	Unknown	C4 H7 F3 O2 P2	205.988	3.43769	Mango
SDW00929	Unknown	C34 H68 N2 O9	648.493	12.8874	Mango
SDW00930	N,N-Dimethylaniline	C8 H11 N	121.089	2.67815	Mango
SDW00931	Unknown	C6 H3 N6 P	190.015	0.384422	Mango
SDW00932	Unknown	unknown	85.0897	14.2972	Mango
SDW00933	Unknown	C5 H3 N3 O6 S	232.974	0.197212	Mango
SDW00934	Gallic acid	C7 H6 O5	170.021	1.48294	Mango
SDW00936	17α-Methyl-androstan-3-hydroxyimine-17β-ol	C20 H33 N O2	319.248	9.46121	Mango
SDW00937	Unknown	C H N4 P S3	195.911	17.277	Mango
SDW00938	Unknown	C4 H11 F N2 P2	168.038	16.8423	Mango
SDW00939	5-[(Z)-Pentadec-8-enyl]benzene-1,3-diol	C21 H34 O2	318.255	11.6245	Mango
SDW00940	Amoxapine	C17 H16 Cl N3 O	313.098	4.71517	Mango
SDW00941	Unknown	C5 H10 Fe O5	203.992	17.1433	Mango
SDW00942	Unknown	C4 H11 F N2 P2	168.038	17.0396	Mango
SDW00943	(2R,3S,4S,5R,6R)-5-{[(2S,3R,4R)-3,4-dihydroxy-4-(hydroxymethyl)oxolan-2-yl]oxy}-2-(hydroxymethyl)-6-(2-phenylethoxy)oxane-3,4-diol	C19 H28 O10	416.168	5.28402	Mango
SDW00944	4-benzyltoluene	C14 H14	183.066	0.813625	Mango
SDW00945	Unknown	C28 H63 F4 N9 O	617.507	16.1016	Mango
SDW00946	glycidyl oleate	C21 H38 O3	338.281	11.6598	Mango
SDW00947	Unknown	C15 H38 F N7	335.318	12.178	Mango
SDW00948	Unknown	C2 H2 F N5 O3	163.014	17.6678	Mango
SDW00949	2-(3-Butoxy-2-hydroxypropyl)malonohydrazide	C10 H22 N4 O4	262.164	0.781555	Mango
SDW00950	Unknown	C34 H47 N3 O S	545.345	11.9797	Mango
SDW00951	Unknown	C12 H32 N10	316.28	9.32086	Mango
SDW00952	Unknown	unknown	116.067	0.742524	Mango
SDW00953	Unknown	C7 H2 Cl F3 N2 O	221.98	0.755247	Mango
SDW00954	(2Z)-5-(1,2,4a,5-tetramethyl-7-oxo-1,2,3,4,4a,7,8,8a-octahydronaphthalen-1-yl)-3-methylpent-2-enoic acid	C20 H30 O3	278.222	12.0198	Mango
SDW00955	Unknown	C2 H F4 N2 O2 P	191.972	0.571362	Mango
SDW00956	Unknown	C13 H25 F4 N4 O3 P3	454.108	0.764851	Mango
SDW00957	Unknown	C4 H8 F N4 O2 P	194.037	0.37131	Mango
SDW00958	1,5-Isoquinolinediol	C9 H7 N O2	161.047	3.81075	Mango
SDW00959	Unknown	C5 H5 F4 N3 O	199.037	16.7815	Mango
SDW00960	2475675	C23 H34 O2	342.255	11.502	Mango
SDW00961	Unknown	C48 H61 F	656.478	15.5429	Mango
SDW00962	2-{(2-Hydroxyethyl)[3-(tridecyloxy)propyl]nitroryl}ethanol	C20 H43 N O4	361.318	8.49609	Mango
SDW00963	Unknown	C19 H31 F3 N2 O4	408.222	12.1634	Mango
SDW00964	Unknown	C19 H38 F4 N O3 P3 S	529.173	5.5393	Mango
SDW00965	3,4,5-Trimethoxy-N-(6-methyl-2-pyridinyl)benzamide	C16 H18 N2 O4	302.126	0.910044	Mango
SDW00966	γ-Linolenic acid ethyl ester	C20 H34 O2	312.266	15.3554	Mango
SDW00967	Unknown	C7 H9 N2 O4 P	216.031	2.28269	Mango
SDW00968	Furfuranol	C5 H6 O2	98.0372	1.97228	Mango
SDW00969	AM9627000	C8 H7 N O3	165.042	4.82976	Mango
SDW00970	Unknown	C3 H2 O5 S	149.962	17.1964	Mango
SDW00971	Unknown	C4 H11 F N2 P2	168.038	17.1954	Mango
SDW00972	Demeton-S-Methyl-Sulfone	C6 H15 O5 P S2	262.053	1.26131	Mango
SDW00973	Unknown	C36 H69 F O6	616.506	13.5618	Mango
SDW00974	Unknown	C7 H2 N2 O	130.017	0.599361	Mango
SDW00975	Unknown	C3 H6 Fe O3	143.971	16.9386	Mango
SDW00976	Unknown	C28 H63 F N6 O4	566.49	14.8049	Mango
SDW00977	Unknown	C40 H64 F2 O2	614.49	14.3504	Mango
SDW00978	D-(+)-Maltose	C12 H22 O11	364.098	8.54504	Mango
SDW00979	2387022	C25 H44 O2	376.334	13.0424	Mango
SDW00980	2475675	C23 H34 O2	342.255	11.3242	Mango
SDW00981	4-(4-Methoxyphenyl)thiazol-2-amine	C10 H10 N2 O S	206.051	2.52306	Mango
SDW00982	Demeton-S-Methyl-Sulfone	C6 H15 O5 P S2	262.053	0.607569	Mango
SDW00983	Unknown	C33 H67 N4 O5 P	630.483	13.2569	Mango
SDW00984	leucoline	C9 H7 N	129.058	3.76448	Mango
SDW00985	Unknown	C5 H3 F2 N2 P S	191.972	3.03437	Mango
SDW00987	2,3,4,9-Tetrahydro-1H-β-carboline-3-carboxylic acid	C12 H12 N2 O2	216.09	3.5019	Mango
SDW00988	Unknown	C7 H6 F3 N2 O4 P3	331.95	16.7009	Mango
SDW00989	Unknown	C5 H7 F N4 O5	222.041	16.6904	Mango
SDW00990	Unknown	C7 H6 F N4 O5 P	276.006	0.960242	Mango
SDW00991	Unknown	C15 H40 N9 O7 P	489.279	13.5791	Mango
SDW00992	DL-Homoserine	C4 H9 N O3	119.058	0.818034	Mango
SDW00993	Unknown	unknown	103.956	0.244609	Mango
SDW00994	1,2-di-O-methyl-4-[(2R)-2,4-dihydrobutyramido]-4,6-dideoxy-alpha-D-mannopyranoside	C12 H23 N O7	293.147	1.23652	Mango
SDW00995	2-Hydroxyquinoline	C9 H7 N O	145.053	4.62826	Mango
SDW00996	Guanine	C5 H5 N5 O	151.049	1.35534	Mango
SDW00998	α-Lactose	C12 H22 O11	359.142	0.874528	Mango
SDW00999	leucoline	C9 H7 N	129.058	3.31839	Mango
SDW01000	2,3-dihydroxypropyl 12-methyltridecanoate	C17 H34 O4	302.245	10.9382	Mango
SDW01001	1-lauroyl-sn-glycero-3-phosphocholine	C20 H42 N O7 P	439.269	10.8482	Mango
SDW01002	Spirost-5-en-3-ol	C27 H42 O3	414.313	10.7509	Mango
SDW01003	Unknown	C3 H F2 N S	120.98	16.9655	Mango
SDW01004	L-Aspartic acid	C4 H7 N O4	133.037	0.811174	Mango
SDW01005	1-(Phenylsulfonyl)-2-pyrrolecarboxaldehyde	C11 H9 N O3 S	235.03	2.91809	Mango
SDW01006	Unknown	C8 H6 Cl F N6 O	256.028	0.650809	Mango
SDW01007	Unknown	C33 H20 F2 O9	598.108	10.1809	Mango
SDW01008	Unknown	C36 H65 F O S	564.475	14.5026	Mango
SDW01009	Unknown	unknown	83.0741	1.09358	Mango
SDW01010	L-Proline	C5 H9 N O2	115.064	16.8498	Mango
SDW01011	Unknown	C2 H F5 O	135.994	0.836087	Mango
SDW01012	Unknown	C10 H5 F3 N2 O4 S	305.993	16.8647	Mango
SDW01013	Unknown	C7 H N3 O	143.012	0.613786	Mango
SDW01014	Ro 20-1724	C15 H22 N2 O3	278.163	4.43479	Mango
SDW01015	C16 phytosphingosine	C16 H35 N O3	289.261	8.98348	Mango
SDW01016	5735560	C15 H26 O	223.12	2.64076	Mango
SDW01017	Unknown	unknown	97.9774	1.32161	Mango
SDW01018	Unknown	C33 H73 N5 O7 P2	713.499	13.7417	Mango
SDW01019	TI5270000	C9 H7 N O3	177.042	4.80992	Mango
SDW01020	Unknown	C3 H5 F N4 O4	180.03	0.649083	Mango
SDW01021	Unknown	C33 H46 Cl N O3	539.314	11.0303	Mango
SDW01022	Unknown	C17 H43 F4 N10 O3 P	542.317	10.9329	Mango
SDW01023	Nicotinic acid	C6 H5 N O2	123.032	0.918979	Mango
SDW01025	Unknown	C3 H9 F2 N2 O2 P	174.038	4.74578	Mango
SDW01026	Unknown	C6 H3 N6 P	190.015	0.625234	Mango
SDW01027	Unknown	C37 H68 F2 N2 O3 S	658.493	16.4631	Mango
SDW01028	valinol	C5 H13 N O	103.1	12.3826	Mango
SDW01029	Unknown	unknown	252.624	10.402	Mango
SDW01030	Unknown	C32 H66 N2 O7	590.488	15.8152	Mango
SDW01032	Unknown	C27 H51 F2 N2 O3 P	520.36	11.9034	Mango
SDW01033	Niacin	C6 H5 N O2	123.032	0.871942	Mango
SDW01034	Octylamine	C8 H19 N	129.152	3.22621	Mango
SDW01035	glycidyl oleate	C21 H38 O3	338.282	11.4202	Mango
SDW01036	Unknown	C3 H3 F2 N O6	186.993	16.9248	Mango
SDW01037	Unknown	C4 H12 F N4 O4 P S2	294.003	16.8554	Mango
SDW01038	1739990	C13 H29 N	197.994	1.04271	Mango
SDW01039	Unknown	C16 H26 N5 O4 P3	445.121	1.90269	Mango
SDW01040	Unknown	C6 H3 N2 O P	149.998	16.7499	Mango
SDW01041	Unknown	C12 H14 F2 N3 O P	285.084	0.907513	Mango
SDW01042	Unknown	unknown	85.946	17.1412	Mango
SDW01043	Unknown	C18 H33 N7	347.279	11.5608	Mango
SDW01044	Terbacil	C9 H13 Cl N2 O2	216.067	16.7369	Mango
SDW01045	Unknown	unknown	145.911	16.9278	Mango
SDW01046	2-methyl thieno[2,3-d]thiazole	C6 H5 N S2	154.967	0.112555	Mango
SDW01048	Unknown	C30 H63 N7 O2	553.506	13.3914	Mango
SDW01049	Unknown	C3 H5 P S	103.985	8.31657	Mango
SDW01050	Unknown	C13 H9 N4 P	252.057	2.92359	Mango
SDW01051	2-Acetyl-4-hydroxyphenyl beta-D-glucopyranoside	C14 H18 O8	314.1	2.68809	Mango
SDW01052	Asarone	C12 H16 O3	208.11	8.2255	Mango
SDW01053	Unknown	unknown	69.9739	16.4924	Mango
SDW01054	Unknown	C8 H22 N2 O3 P2 S	288.084	0.79162	Mango
SDW01055	Unknown	unknown	87.9617	17.2737	Mango
SDW01056	Adenosine 5'-monophosphate	C10 H14 N5 O7 P	347.062	1.05419	Mango
SDW01057	Nicotinamide	C6 H6 N2 O	122.048	1.48661	Mango
SDW01059	dimethyl itaconate	C7 H10 O4	158.058	0.843474	Mango
SDW01060	Unknown	unknown	90.0475	1.15803	Mango
SDW01061	Unknown	C9 H13 N4 O3 P3 S	349.994	12.4477	Mango
SDW01062	Unknown	unknown	110.016	0.353731	Mango
SDW01063	Unknown	unknown	79.9412	8.89377	Mango
SDW01064	Guanosine	C10 H13 N5 O5	283.091	1.36934	Mango
SDW01065	GSK1614235 FREE BASE	C28 H45 N3 O7	514.314	10.5327	Mango
SDW01066	Unknown	C36 H54 N4 O2	574.423	13.0496	Mango
SDW01068	Unknown	C3 H6 F2 N4 O5	216.031	2.06869	Mango
SDW01069	Unknown	C33 H70 N O2 P S	575.487	13.3435	Mango
SDW01070	Unknown	C2 H7 N2 O5 P	170.009	0.713007	Mango
SDW01072	Unknown	C6 H3 F4 N2 O7 P S	353.933	16.5424	Mango
SDW01073	Unknown	C3 H5 N2 O5 P	179.993	8.68031	Mango
SDW01074	Unknown	C3 H F2 N S	120.98	17.1708	Mango
SDW01075	Toxopyrimidine	C6 H9 N3 O	138.994	16.6788	Mango
SDW01076	Unknown	C2 H6 N2 P2	120	1.93046	Mango
SDW01077	Dimethyl 2,2'-(acetylimino)diacetate	C8 H13 N O5	203.079	0.922739	Mango
SDW01078	Sinapinic acid	C11 H12 O5	206.058	6.19635	Mango
SDW01079	Unknown	C7 H6 F4 N2 O5 S	305.993	16.7035	Mango
SDW01081	TREPROSTINIL HEXADECYL ESTER	C39 H66 O5	614.489	14.5296	Mango
SDW01082	L-Ethionine	C6 H13 N O2 S	163.066	0.898091	Mango
SDW01083	8-Methyl-1H-imidazo[4,5-e][1,2,5]oxadiazolo[3,4-g][2,1,3]benzoxadiazol-1-ol 4-oxide	C8 H4 N6 O4	248.029	0.773199	Mango
SDW01084	Unknown	C6 H5 N2 O4 P	199.999	16.8993	Mango
SDW01085	ascr#27	C22 H40 O6	400.282	11.2901	Mango
SDW01086	Schaftoside	C26 H28 O14	564.147	5.56613	Mango
SDW01087	Unknown	unknown	86.0373	1.02025	Mango
SDW01088	Unknown	C12 H11 F2 N4 O10 P3	501.966	16.5695	Mango
SDW01089	Unknown	unknown	145.911	16.6868	Mango
SDW01090	Unknown	C3 H4 F N5 O3	177.03	0.391417	Mango
SDW01091	Terbacil	C9 H13 Cl N2 O2	216.067	16.5421	Mango
SDW01092	DL-Tryptophan	C11 H12 N2 O2	226.071	2.78865	Mango
SDW01093	Unknown	C34 H75 N5 O7 P2	727.514	13.2936	Mango
SDW01094	Unknown	C3 H4 F N7 O S	205.018	1.00479	Mango
SDW01095	Unknown	unknown	195.91	16.9067	Mango
SDW01096	(2S)-N-[(2S,4S,5S)-5-Formamido-4-hydroxy-1,6-diphenyl-2-hexanyl]-3-methyl-2-(2-oxotetrahydro-1(2H)-pyrimidinyl)butanamide	C28 H38 N4 O4	494.289	4.14455	Mango
SDW01097	Unknown	C3 H4 F2 N4 S	166.013	16.8213	Mango
SDW01098	1-Oxo-2,3-dihydro-1H-phospholium	C4 H6 O P	101.961	17.4038	Mango
SDW01099	Unknown	C2 H4 F2 O7	177.993	10.5233	Mango
SDW01100	Unknown	unknown	130.954	0.634625	Mango
SDW01101	MONOLINOLENIN	C21 H36 O4	352.261	10.9082	Mango
SDW01102	Unknown	C5 H5 N3 O2 P2	200.985	17.4009	Mango
SDW01103	Unknown	unknown	85.0897	13.9309	Mango
SDW01104	Ferulic acid	C10 H10 O4	194.058	4.51159	Mango
SDW01105	Unknown	C36 H43 F2 N O	543.33	10.9068	Mango
SDW01106	2,3-dihydroxypropyl 12-methyltridecanoate	C17 H34 O4	324.227	10.9499	Mango
SDW01107	Unknown	C7 H4 N4 S2	207.988	17.2235	Mango
SDW01109	Unknown	C20 H38 F N2 O6 P	452.244	11.3782	Mango
SDW01110	1,6-Nonadiene-3,8-diyn-5-one	C9 H6 O	130.042	1.82681	Mango
SDW01111	P-Benzylphosphonothioic diamide	C7 H11 N2 P S	185.988	13.2447	Mango
SDW01112	Unknown	C13 H29 F2 N9	349.25	11.6345	Mango
SDW01113	1,4a-dimethyl-9-oxo-7-(propan-2-yl)-1,2,3,4,4a,9,10,10a-octahydrophenanthrene-1-carboxylic acid	C20 H26 O3	314.188	8.88747	Mango
SDW01114	Unknown	C20 H51 F N10 O2 S	514.388	11.6487	Mango
SDW01115	Cyclopenta[c]pyran-7-carbaldehyde	C9 H6 O2	146.037	1.11859	Mango
SDW01116	Unknown	C10 H3 F2 N O	191.018	16.7147	Mango
SDW01118	Unknown	C5 H12 P2 S	166.013	16.5908	Mango
SDW01119	S~1~,S~2~-Dimethyl 1,2-hydrazinedicarbothioate	C4 H8 N2 O2 S2	180.003	0.88542	Mango
SDW01120	Unknown	C34 H54 N4 O10	678.382	10.444	Mango
SDW01121	Unknown	unknown	60.0042	0.824177	Mango
SDW01122	Pentamethylbenzene	C11 H16	148.016	9.86074	Mango
SDW01123	5-O-(indol-3-ylacetyl)-myo-inositol D-galactoside	C22 H29 N O12	499.168	3.98434	Mango
SDW01125	N'-(4-Cyano-3-methylpyrido[1,2-a]benzimidazol-1-yl)-N,N-dimethyliminoformamide	C16 H15 N5	277.138	10.9014	Mango
SDW01127	Unknown	C40 H74 N5 O3 P S	735.525	13.1785	Mango
SDW01128	Unknown	C36 H69 F O6	616.506	13.9671	Mango
SDW01129	Unknown	C22 H47 N2 O14 P	594.278	12.0169	Mango
SDW01130	1,2-Dihydro-5-nitro-3H-indazol-3-one	C7 H5 N3 O3	179.033	0.635889	Mango
SDW01131	Unknown	unknown	72.0582	1.23408	Mango
SDW01132	Unknown	C15 H37 F N8	348.311	10.0656	Mango
SDW01133	Cafestol	C20 H28 O3	294.219	10.1511	Mango
SDW01134	Asparagine	C4 H8 N2 O3	132.053	1.29559	Mango
SDW01135	Unknown	C6 H9 N3 O3 P2	233.011	17.0715	Mango
SDW01136	P-Benzylphosphonothioic diamide	C7 H11 N2 P S	185.988	13.9954	Mango
SDW01138	Unknown	C41 H62 S	586.457	14.4325	Mango
SDW01139	ETHYL 2-(HYDROXYIMINO)-6-NITROHEXANOATE	C8 H14 N2 O5	219.11	2.21844	Mango
SDW01142	Unknown	C18 H44 F3 N10 O2 P	520.335	10.5728	Mango
SDW01143	Unknown	C25 H46 N6 O7	542.342	11.9177	Mango
SDW01144	MFCD00046761	C23 H46 O4	386.339	12.7131	Mango
SDW01145	Guanine	C5 H5 N5 O	151.049	1.82282	Mango
SDW01146	1,5-Dimethyl-1H-pyrazol-3-amine	C5 H9 N3	110.048	1.12786	Mango
SDW01147	Uracil	C4 H4 N2 O2	112.028	1.18715	Mango
SDW01148	N,N-Dihexyloctanamide	C20 H41 N O	311.318	12.5952	Mango
SDW01149	1-Octen-3-yne	C8 H12	108.021	1.27943	Mango
SDW01150	Unknown	C35 H54 N4 O2	562.423	13.1313	Mango
SDW01151	Unknown	C24 H45 F N6 O3	484.352	12.9302	Mango
SDW01153	Unknown	C12 H16 O11	336.068	0.862041	Mango
SDW01154	Picolinic acid	C6 H5 N O2	124.064	0.850027	Mango
SDW01155	N1-[5-chloro-6-methyl-2-(2-pyridyl)pyrimidin-4-yl]-N2-[6-(trifluoromethyl)-2-pyridyl]ethane-1,2-diamine	C18 H16 Cl F3 N6	386.121	4.71993	Mango
SDW01156	1-Stearoyl-2-hydroxy-sn-glycero-3-PE	C23 H48 N O7 P	481.316	10.8324	Mango
SDW01157	Flurazepam	C21 H23 Cl F N3 O	370.126	5.84794	Mango
SDW01158	Unknown	C10 H21 F5 N2 O P2 S5	501.966	16.4166	Mango
SDW01159	4-(2,5-Dioxo-1-pyrrolidinyl)benzoic acid	C11 H9 N O4	220.084	1.37996	Mango
SDW01160	Unknown	C16 H22 F N O4 P2	373.1	2.57526	Mango
SDW01161	Unknown	C4 H5 Cl2 F N4 O	213.982	17.1563	Mango
SDW01164	D-(+)-Proline	C5 H9 N O2	115.064	4.94727	Mango
SDW01165	Unknown	C37 H65 F5 S	636.472	14.3854	Mango
SDW01166	Sphingosine (d18:1)	C18 H37 N O2	299.282	11.387	Mango
SDW01167	Unknown	C36 H69 F2 N4 O P	642.519	12.1069	Mango
SDW01168	1-linoleoyl-sn-glycero-3-phosphoethanolamine	C23 H44 N O7 P	477.285	10.5906	Mango
SDW01169	N~6~-(Carboxymethyl)-L-lysine	C8 H16 N2 O4	204.111	0.742137	Mango
SDW01170	FG7175000	C9 H7 N O	145.053	2.44104	Mango
SDW01171	Unknown	C2 H6 F4 N4	162.053	1.38241	Mango
SDW01172	Propylparaben	C10 H12 O3	180.078	6.00858	Mango
SDW01173	Unknown	C3 H4 F2 O8	205.988	10.8481	Mango
SDW01174	ETFAA	C6 H7 F3 O3	184.035	7.34191	Mango
SDW01175	Bromobenzene	C6 H5 Br	155.958	16.9029	Mango
SDW01177	Unknown	C9 H11 F4 O3 P S	306.011	16.9989	Mango
SDW01178	Unknown	C4 H9 F2 N6 O2 P S2	305.993	16.495	Mango
SDW01179	Unknown	C5 H F3 N4 S	205.987	16.7277	Mango
SDW01180	Unknown	C5 H8 F N2 O2 P	178.03	17.4041	Mango
SDW01181	Unknown	C6 H F3 N O P	190.975	0.639654	Mango
SDW01182	Unknown	unknown	71.0742	16.87	Mango
SDW01183	Unknown	C13 H20 Cl2 N2 O S	322.066	2.8336	Mango
SDW01184	(6E,10E,14E,18E)-2,6,10,19,23-Pentamethyl-2,6,10,14,18,22-tetracosahexaene	C29 H48	396.375	14.7593	Mango
SDW01185	Bentazone	C10 H12 N2 O3 S	240.056	2.88371	Mango
SDW01187	Corymboside	C26 H28 O14	564.147	6.06645	Mango
SDW01189	5-[(10Z)-14-(3,5-dihydroxyphenyl)tetradec-10-en-1-yl]benzene-1,3-diol	C26 H36 O4	390.276	12.3238	Mango
SDW01190	Unknown	C11 H31 F3 N10 O3	408.252	13.9401	Mango
SDW01191	3683	C8 H14 O3	158.094	7.83248	Mango
SDW01192	Monoolein	C21 H40 O4	356.292	11.4398	Mango
SDW01193	Leu-Gly-Pro	C13 H23 N3 O4	285.168	1.4371	Mango
SDW01194	MONOLINOLENIN	C21 H36 O4	352.261	10.8138	Mango
SDW01196	Bromobenzene	C6 H5 Br	155.958	16.7226	Mango
SDW01197	Unknown	C36 H65 N O3	559.496	13.0215	Mango
SDW01198	N-Acetyl-D-quinovosamine	C8 H15 N O5	205.095	1.01743	Mango
SDW01199	Fluopyram	C16 H11 Cl F6 N2 O	396.048	0.89773	Mango
SDW01200	Unknown	C23 H43 F3 O2	408.321	12.709	Mango
SDW01201	Unknown	C6 H9 F4 N3 O11 P2	436.965	0.853484	Mango
SDW01202	Unknown	unknown	286.625	10.9196	Mango
SDW01204	leucoline	C9 H7 N	129.058	4.16122	Mango
SDW01205	Unknown	C7 H3 F2 O2 P	187.984	16.7007	Mango
SDW01207	Unknown	unknown	81.9909	0.628399	Mango
SDW01208	Unknown	C27 H44 F N3 O7	541.314	10.5753	Mango
SDW01209	Unknown	C7 H5 F5 O2	216.021	17.2403	Mango
SDW01210	Unknown	C5 H3 F2 N3 O2 S	206.991	17.1313	Mango
SDW01211	Unknown	C5 H8 F N4 O2 P	206.037	17.0454	Mango
SDW01212	1-Linoleoyl glycerol	C21 H38 O4	336.266	11.3801	Mango
SDW01213	Unknown	C12 H5 F6 N O8 S	436.964	1.02796	Mango
SDW01215	1-(2,6-Dimethylphenyl)-1,2-hydrazinedicarboximidamide	C10 H16 N6	221.105	1.12047	Mango
SDW01216	Unknown	unknown	120.01	16.8234	Mango
SDW01217	Unknown	C5 H6 F3 N6 O P3	315.977	16.8615	Mango
SDW01218	Unknown	C33 H69 N4 O4 P	616.506	13.7615	Mango
SDW01219	Unknown	C34 H54 F N4 O P	584.405	13.1265	Mango
SDW01220	Unknown	unknown	81.9909	0.696475	Mango
SDW01221	Octahydro-benzoimidazole-2-thione	C7 H12 N2 S	156.073	0.674406	Mango
SDW01222	Unknown	C38 H78 F2 N5 P S2	737.54	13.3844	Mango
SDW01223	N-arachidonoylsphingosine	C38 H67 N O3	585.511	14.3398	Mango
SDW01224	Unknown	C6 H3 F5 N O3 P	262.977	16.5553	Mango
SDW01225	2-(3,5-Dinitrophenyl)-5-[4-(2-methyl-2-propanyl)phenyl]-1,3,4-oxadiazole	C18 H16 N4 O5	368.11	6.88025	Mango
SDW01226	Tocopheryl acetate	C31 H52 O3	472.391	14.9416	Mango
SDW01227	Unknown	unknown	82.0425	1.19469	Mango
SDW01228	Unknown	C8 H11 N2 O7 P	278.031	4.96183	Mango
SDW01229	4-Hydroxyfurano [ 2",3":6,7 ] aurone	C17 H10 O4	278.058	17.0108	Mango
SDW01230	(+) -Gallocatechin	C15 H14 O7	306.075	1.256	Mango
SDW01231	Unknown	unknown	132.027	4.74551	Mango
SDW01232	6-[(2E,6E)-7-(5-hydroxy-3-methyl-2-oxocyclopent-3-en-1-yl)-6-methylhepta-2,6-dien-2-yl]-3-methyl-5,6-dihydro-2H-pyran-2-one	C20 H26 O4	330.182	8.63106	Mango
SDW01233	ACETYL PROLINE	C7 H11 N O3	157.074	1.96707	Mango
SDW01234	Phthalic anhydride	C8 H4 O3	148.016	9.73703	Mango
SDW01236	Unknown	C6 H4 F2 O2 P2	207.965	0.709047	Mango
SDW01237	1-Linoleoyl glycerol	C21 H38 O4	336.266	10.7248	Mango
SDW01238	Unknown	unknown	98.9718	16.8697	Mango
SDW01239	Unknown	C6 H5 F3 N O2 P	211	1.02144	Mango
SDW01240	9(11)-dehydroaxinysterol	C28 H40 O3	424.297	12.4058	Mango
SDW01241	5-Chloro-1-(4-chlorophenyl)-1H-tetrazole	C7 H4 Cl2 N4	213.982	16.9474	Mango
SDW01242	Unknown	C21 H37 F4 N4 O2 P3	546.206	2.77106	Mango
SDW01243	Unknown	unknown	133.987	16.4467	Mango
SDW01245	Unknown	C37 H57 F O4	584.422	12.4626	Mango
SDW01246	NP-007909	C13 H20 O3	206.13	4.64483	Mango
SDW01247	Unknown	C10 H14 F N2 O5 P	292.062	7.57254	Mango
SDW01248	4-Hydroxyfurano [ 2",3":6,7 ] aurone	C17 H10 O4	278.058	17.1722	Mango
SDW01249	S-methylglutathione	C11 H19 N3 O6 S	321.099	0.897131	Mango
SDW01250	Unknown	C4 H11 F4 N4 O4 P	286.045	0.987581	Mango
SDW01251	4,5,8-trihydroxy-5-(hydroxymethyl)-3-(3-methoxy-3-oxoprop-1-en-2-yl)-8a-methyl-decahydronaphthalen-2-yl 3,4-dihydroxy-2-methylidenebutanoate	C21 H32 O10	444.199	5.18044	Mango
SDW01252	Guanine	C5 H5 N5 O	151.049	1.63079	Mango
SDW01253	Unknown	unknown	76.9622	15.3459	Mango
SDW01255	Unknown	unknown	85.0897	14.6375	Mango
SDW01256	Unknown	C12 H13 F4 N6 O4 P S3	507.983	14.7198	Mango
SDW01257	Dihomo-γ-linolenic acid ethyl ester	C22 H38 O2	340.297	12.2319	Mango
SDW01258	D-(+)-Maltose	C12 H22 O11	342.116	5.86875	Mango
SDW01259	Unknown	C5 H10 N4 O4 S	222.041	16.465	Mango
SDW01260	Glucogallin	C13 H16 O10	332.074	1.47566	Mango
SDW01261	N-Acetyl-D-quinovosamine	C8 H15 N O5	205.095	0.843502	Mango
SDW01262	Unknown	unknown	89.941	0.399769	Mango
SDW01263	Unknown	C4 H10 F N3 O4	183.066	0.968513	Mango
SDW01264	2-(3,5-Dinitrophenyl)-5-[4-(2-methyl-2-propanyl)phenyl]-1,3,4-oxadiazole	C18 H16 N4 O5	368.11	6.4868	Mango
SDW01265	Unknown	C8 H2 Cl F N4 O14 S3	527.84	0.689619	Mango
SDW01266	Glucose 1-phosphate	C6 H13 O9 P	238.047	0.824041	Mango
SDW01267	Unknown	C6 H14 F N2 O5 P3	306.011	17.1823	Mango
SDW01268	Unknown	C19 H29 F3 O9	458.176	7.84453	Mango
SDW01271	Unknown	C6 H6 F N5 S3	262.977	16.3561	Mango
SDW01272	Benzenol	C6 H6 O	94.0423	0.948762	Mango
SDW01273	[Similar to: methyl 3,3,3-trifluoro-2-hydroxy-2-{4-[(phenoxycarbonyl)amino]phenyl}propanoate; ΔMass: -275.0401 Da]	unknown	94.0423	1.11672	Mango
SDW01274	Unknown	C5 H8 F N2 O6 P	242.01	17.0929	Mango
SDW01275	Unknown	C H N4 O P3	177.937	16.9186	Mango
SDW01276	5-(2-Nitroprop-1-enyl)-1,3-benzodioxole	C10 H9 N O4	207.053	3.48549	Mango
SDW01277	Diosgenin	C27 H42 O3	396.302	10.7503	Mango
SDW01278	Unknown	C13 H10 F2 S	236.047	17.0895	Mango
SDW01279	Unknown	C7 H3 F N4 O5 P2	303.955	17.0295	Mango
SDW01280	1-Linoleoyl glycerol	C21 H38 O4	336.266	15.3546	Mango
SDW01282	Unknown	C33 H66 F3 N4 O P S	654.462	14.9054	Mango
SDW01283	Gallic acid	C7 H6 O5	170.021	1.16215	Mango
SDW01285	Levulinic acid	C5 H8 O3	116.048	0.173524	Mango
SDW01287	Unknown	unknown	85.0897	13.6763	Mango
SDW01288	Unknown	C6 H15 F2 N3 O S3	279.034	16.9194	Mango
SDW01289	Unknown	C14 H17 F2 N4 O2 P S5	501.966	16.7191	Mango
SDW01290	Unknown	C H2 F N5 O2	135.019	17.2504	Mango
SDW01291	Unknown	C29 H53 Cl F O2 P	518.345	11.4327	Mango
SDW01292	Unknown	C4 H9 N3 S2	163.024	16.4364	Mango
SDW01293	Unknown	unknown	76.9622	12.6819	Mango
SDW01294	3-Methoxycinnamic acid	C10 H10 O3	160.052	4.72267	Mango
SDW01295	tert-Butyl 2-tert-butyl-5-(2-hydroxyethyl)-3-methyl-4-oxo-1-imidazolidinecarboxylate	C15 H28 N2 O4	300.204	11.7643	Mango
SDW01296	Unknown	C18 H35 F3 N4 O2 S	428.244	11.3808	Mango
SDW01297	Unknown	C6 H N2 O2 P	163.977	0.331931	Mango
SDW01298	γ-Linolenic acid ethyl ester	C20 H34 O2	312.266	12.2833	Mango
SDW01299	BMK methyl glycidate	C11 H12 O3	192.078	4.86765	Mango
SDW01300	4-benzyltoluene	C14 H14	183.066	11.0458	Mango
SDW01301	MFCD00130066	C10 H9 N O5	223.048	4.86673	Mango
SDW01302	Unknown	C25 H47 F4 N4 P3	572.296	11.9698	Mango
SDW01303	5-Hydroxymethyl-2-furaldehyde	C6 H6 O3	126.032	4.93751	Mango
SDW01304	Unknown	C4 H5 Cl2 F N4 O	213.982	16.7633	Mango
SDW01305	dimethyl itaconate	C7 H10 O4	158.058	1.2052	Mango
SDW01306	Hexadecanamide	C16 H33 N O	255.256	11.2793	Mango
SDW01307	Unknown	C6 H7 N3 O5 S	233.011	16.8296	Mango
SDW01308	Unknown	C7 H3 F N2 O5 S2	277.947	16.7218	Mango
SDW01309	Methyl 4,6-dideoxy-4-[(2,4-dihydroxybutanoyl)amino]hexopyranoside	C11 H21 N O7	279.131	0.880193	Mango
SDW01312	Unknown	C33 H60 N6 O2	572.48	16.305	Mango
SDW01313	Unknown	C4 H2 N4 O3 S	185.985	1.02468	Mango
SDW01314	Unknown	C2 H5 Cl2 N O2	144.97	16.8323	Mango
SDW01315	Unknown	C8 H15 F2 N3 O3 S	271.08	0.808588	Mango
SDW01316	SL3784000	C10 H10 O2	162.068	1.14358	Mango
SDW01317	Unknown	C5 H7 F N4 O3 S2	253.995	0.846449	Mango
SDW01318	Diethyl acetamidomalonate	C9 H15 N O5	217.095	2.63332	Mango
SDW01320	Flusulfamide	C13 H7 Cl2 F3 N2 O4 S	413.946	16.9594	Mango
SDW01321	Unknown	C38 H55 F3 O	584.422	12.1803	Mango
SDW01322	Unknown	C4 H3 F O S2	149.961	0.141136	Mango
SDW01323	Unknown	C5 H8 F N2 O6 P	242.01	16.7486	Mango
SDW01324	D-(+)-Maltose	C12 H22 O11	364.098	7.69308	Mango
SDW01325	Ethyl 3-{[2-(aminocarbonyl)-3-thienyl]amino}-3-oxopropanoate	C10 H12 N2 O4 S	278.031	0.152001	Mango
SDW01326	Unknown	C5 H3 N4 O7 P	261.974	13.9904	Mango
SDW01327	NP-005196	C15 H22 O5	264.136	5.8009	Mango
SDW01329	Unknown	C19 H29 F3 N2 O4	406.207	11.5681	Mango
SDW01330	Oleanolic acid	C30 H48 O3	438.349	11.7109	Mango
SDW01331	5-[(10Z)-14-(3,5-dihydroxyphenyl)tetradec-10-en-1-yl]benzene-1,3-diol	C26 H36 O4	390.276	12.0354	Mango
SDW01332	Histamine	C5 H9 N3	111.08	0.804268	Mango
SDW01333	NP-011548	C18 H34 O3	298.25	10.5054	Mango
SDW01334	Unknown	C34 H56 N4 O10	680.398	10.8377	Mango
SDW01335	Unknown	C33 H60 O14	680.397	11.0554	Mango
SDW01336	Methylenesuccinate	C5 H4 O4	128.011	1.07484	Mango
SDW01337	Unknown	unknown	102.971	16.8063	Mango
SDW01338	Unknown	C12 H6 Cl F N2 O3 S3	375.921	0.666038	Mango
SDW01339	Unknown	C35 H64 N6 O3	616.506	13.3579	Mango
SDW01341	Unknown	unknown	82.0424	1.36089	Mango
SDW01342	Unknown	C18 H34 N2 O6	374.242	10.759	Mango
SDW01343	Indole-3-acetic acid	C10 H9 N O2	175.063	5.9701	Mango
SDW01345	Unknown	C7 H15 F4 N7 O	289.127	0.905078	Mango
SDW01346	Estradiol undecylate	C29 H44 O3	440.328	12.4849	Mango
SDW01348	Acycloguanosine	C8 H11 N5 O3	225.086	1.63566	Mango
SDW01349	2'-Deoxyadenosine	C10 H13 N5 O3	251.101	2.50564	Mango
SDW01350	Unknown	C17 H38 F3 N7 O6	493.282	11.2023	Mango
SDW01351	Unknown	C7 H8 F2 O4 S2	257.982	17.2158	Mango
SDW01352	Unknown	C7 H14 N2 O2 P2	220.052	0.240932	Mango
SDW01353	Unknown	C38 H67 F3 N5 O2 P	713.498	13.5236	Mango
SDW01355	Unknown	C7 H11 Cl F2 N2 O3	244.043	0.620961	Mango
SDW01356	Unknown	C11 H9 N4 O2 P	260.047	17.3472	Mango
SDW01357	Unknown	C9 H16 N O3 P3	279.034	16.6514	Mango
SDW01358	3-Indoleacetic Acid	C10 H9 N O2	175.063	1.69762	Mango
SDW01359	Unknown	C15 H19 F N O8 P	391.084	4.76212	Mango
SDW01360	[Similar to: (2R,3R,4S,5S,6R)-2-{[1,7-bis(4-hydroxyphenyl)heptan-3-yl]oxy}-6-(hydroxymethyl)oxane-3,4,5-triol; ΔMass: -291.2048 Da]	C4 H5 N5 O S	171.021	16.6907	Mango
SDW01361	DL-Citrulline	C6 H13 N3 O3	175.095	0.737106	Mango
SDW01362	Unknown	C15 H31 N5 O3	329.242	16.3712	Mango
SDW01363	Unknown	unknown	79.9412	9.12731	Mango
SDW01364	Unknown	C32 H61 F O7	576.438	13.1534	Mango
SDW01365	Unknown	unknown	87.9843	16.4778	Mango
SDW01366	Unknown	C28 H37 F3 O	446.279	12.5391	Mango
SDW01367	Unknown	C2 H F N4 S	131.99	16.6271	Mango
SDW01369	Unknown	C H2 F3 N5 O S	188.993	16.777	Mango
SDW01371	Unknown	C24 H31 F3 O	392.232	12.2535	Mango
SDW01372	Terbacil	C9 H13 Cl N2 O2	216.067	16.9648	Mango
SDW01373	Unknown	C8 H3 N2 O3 P	205.987	0.286013	Mango
SDW01374	Dimethyl 5-oxo-1,2-pyrrolidinedicarboxylate	C8 H11 N O5	201.063	0.78503	Mango
SDW01375	Unknown	C10 H21 F O2 P2	254.099	0.767505	Mango
SDW01376	Unknown	C8 H14 F5 N6 O P S5	495.949	16.9035	Mango
SDW01377	Unknown	C3 H6 F2 S	112.016	1.30229	Mango
SDW01378	Unknown	C23 H57 F2 N10 O8 P S	702.38	10.8951	Mango
SDW01379	Unknown	C3 H Cl2 F N4	181.956	0.572251	Mango
SDW01380	Unknown	C22 H42 F N3 O7	479.301	11.1114	Mango
SDW01381	3'-Methoxypongapin	C20 H14 O7	366.074	0.800154	Mango
SDW01382	L-Pyroglutamic acid	C5 H7 N O3	129.043	4.93029	Mango
SDW01383	Unknown	C19 H31 N2 O2 P	350.213	11.7761	Mango
SDW01384	Unknown	C24 H49 F N6 O2	472.391	14.7029	Mango
SDW01385	Unknown	C4 H9 O P S	136.012	17.0426	Mango
SDW01386	Unknown	C11 H3 F6 N4 O10 P	495.949	16.6926	Mango
SDW01388	Unknown	C4 H9 O P S	136.012	16.8676	Mango
SDW01389	1913256	C18 H30 O	262.229	10.9083	Mango
SDW01391	5,7-dihydroxy-2-(4-hydroxy-3-methoxyphenyl)-3,4-dihydro-2H-1-benzopyran-4-one	C16 H14 O6	302.079	6.11717	Mango
SDW01392	4-Amino-1,2,5-oxadiazole-3-carboxamide 2-oxide	C3 H4 N4 O3	143.016	0.989715	Mango
SDW01393	1728235	C19 H38 O4	330.276	10.9939	Mango
SDW01394	Unknown	C5 H5 F O S2	163.977	0.5162	Mango
SDW01395	Nipam	C6 H11 N O	113.084	0.75553	Mango
SDW01396	Unknown	C3 H9 F N2 P2	154.022	17.2701	Mango
SDW01397	Unknown	C7 H4 F3 N4 O7 P	343.977	11.9142	Mango
SDW01398	Unknown	C9 H13 F2 O3 P	238.058	7.57374	Mango
SDW01399	Unknown	C4 H7 N3 O2 S	161.026	0.534821	Mango
SDW01400	Unknown	C22 H21 F3 N2 O2	402.155	6.93396	Mango
SDW01402	Unknown	C39 H73 F3 N5 O2 P	731.545	13.6824	Mango
SDW01403	Unknown	C6 H11 N2 O P	158.061	1.70335	Mango
SDW01404	Diethylene glycol n-butyl ether	C8 H18 O3	162.125	5.92521	Mango
SDW01406	Dibutyl itaconate	C13 H22 O4	242.151	7.83246	Mango
SDW01407	Unknown	C15 H36 F N7	333.3	12.6008	Mango
SDW01408	Unknown	C3 H8 Fe O4	161.982	17.3589	Mango
SDW01409	QJ4750000	C10 H8 O2	160.052	5.23826	Mango
SDW01410	(2E)-3-(4-methoxy-2-{[(2S,3R,4S,5S,6R)-3,4,5-trihydroxy-6-(hydroxymethyl)oxan-2-yl]oxy}phenyl)prop-2-enoic acid	C16 H20 O9	356.11	4.36364	Mango
SDW01411	Unknown	C22 H32 F N3 O4 P2 S	515.157	5.53878	Mango
SDW01412	(2E)-3-(4-methoxy-2-{[(2S,3R,4S,5S,6R)-3,4,5-trihydroxy-6-(hydroxymethyl)oxan-2-yl]oxy}phenyl)prop-2-enoic acid	C16 H20 O9	378.092	4.51125	Mango
SDW01413	1-[(9Z)-hexadecenoyl]-sn-glycero-3-phosphocholine	C24 H48 N O7 P	493.316	10.4939	Mango
SDW01414	Unknown	C4 H5 Fe N O2	152.972	17.2484	Mango
SDW01417	1913256	C18 H30 O	262.229	11.217	Mango
SDW01418	Unknown	C28 H18 N6 O10	598.108	10.0182	Mango
SDW01419	4-ETHOXYCARBONYLOXY-3,5-DIMETHOXYBENZOIC ACID	C12 H14 O7	270.073	0.819375	Mango
SDW01420	Sinapinic acid	C11 H12 O5	206.058	5.94548	Mango
SDW01421	Unknown	C23 H44 O9	464.298	10.5584	Mango
SDW01422	3-Methylbutanoic acid	C5 H10 O2	102.069	6.29923	Mango
SDW01423	Unknown	C26 H46 N7 O7 P	599.317	11.2491	Mango
SDW01424	L-Glutamic acid	C5 H9 N O4	147.053	4.93965	Mango
SDW01425	(1E,4E)-1,5-bis(4-methoxyphenyl)penta-1,4-dien-3-one	C19 H18 O3	294.131	3.6693	Mango
SDW01426	Unknown	C23 H40 F2 N2 O5	462.293	12.2295	Mango
SDW01427	Unknown	C10 H2 O	138.011	1.53188	Mango
SDW01428	Unknown	C4 H F N5 O2 P	200.985	16.9851	Mango
SDW01429	UNII:XJ7052W897	C37 H68 O8	640.494	14.6578	Mango
SDW01430	SL3784000	C10 H10 O2	162.068	7.57546	Mango
SDW01431	Unknown	C34 H68 N2 O6 S	632.477	16.1843	Mango
SDW01432	Unknown	C6 H4 Cl N4 O3 P S	277.944	0.677038	Mango
SDW01433	Unknown	unknown	138.524	1.07436	Mango
SDW01434	Unknown	C17 H29 F3 N2 O4	382.207	12.0448	Mango
SDW01435	Sphingosine (d18:1)	C18 H37 N O2	281.271	9.62279	Mango
SDW01437	Guanosine	C10 H13 N5 O5	283.091	1.82772	Mango
SDW01438	Unknown	C15 H33 F N4 O9	432.225	12.2632	Mango
SDW01440	Unknown	C8 H15 Cl N2 S	206.064	0.638165	Mango
SDW01441	Unknown	C4 H F O2	99.9962	0.846032	Mango
SDW01442	Unknown	unknown	106.021	16.9967	Mango
SDW01443	Unknown	C3 H8 F N2 O6 P	218.01	0.359168	Mango
SDW01444	Unknown	C5 H11 N2 O8 P	258.025	0.654386	Mango
SDW01445	Unknown	C35 H72 F N10 O P S	730.533	13.5267	Mango
SDW01447	Gramine	C11 H14 N2	129.058	2.77635	Mango
SDW01448	Unknown	C40 H68 F2 O2	618.519	13.0997	Mango
SDW01449	Unknown	C14 H32 F5 N7 O	409.26	14.399	Mango
SDW01450	Unknown	C7 H3 F	106.021	17.1851	Mango
SDW01451	Unknown	unknown	261.629	10.4376	Mango
SDW01452	Unknown	unknown	104.103	11.1899	Mango
SDW01453	Sinapinic acid	C11 H12 O5	206.058	5.32195	Mango
SDW01454	Furaneol	C6 H8 O3	128.047	1.26073	Mango
SDW01455	NP-007735	C18 H24 O12	432.126	6.14907	Mango
SDW01456	Unknown	C19 H31 F3 N2 O4	408.222	11.9093	Mango
SDW01457	Unknown	C19 H33 N3 O6	399.236	5.23286	Mango
SDW01458	γ-Linolenic acid ethyl ester	C20 H34 O2	312.266	11.5145	Mango
SDW01459	NP-008882	C27 H48 O9	538.315	4.76691	Mango
SDW01461	2-(Cyclohexylmethylidene)-1,2,3,4-tetrahydronaphthalen-1-one	C17 H20 O	240.147	1.15897	Mango
SDW01462	Unknown	C2 H2 O4 S	121.968	17.0428	Mango
SDW01463	3134	C7 H11 N S	142.011	0.117404	Mango
SDW01464	γ-Linolenic acid ethyl ester	C20 H34 O2	312.266	10.9937	Mango
SDW01465	1-Isocyanohexane	C7 H13 N	111.105	0.578453	Mango
SDW01466	NP-020705	C17 H24 O8	356.146	6.76128	Mango
SDW01467	Unknown	unknown	56.027	0.836812	Mango
SDW01468	3'-Methoxypongapin	C20 H14 O7	366.074	1.12989	Mango
SDW01469	Unknown	C4 H6 F2 O7	204.008	1.20884	Mango
SDW01470	Oxadixyl	C14 H18 N2 O4	278.126	0.909354	Mango
SDW01471	Unknown	C7 H F N4 O S3	271.929	16.737	Mango
SDW01472	Unknown	C29 H46 F4 N4 O3 P2	636.297	11.1836	Mango
SDW01474	Unknown	C2 H2 F2 N4 O5	199.999	16.7351	Mango
SDW01475	Unknown	C19 H44 N7 O5 P	481.316	11.8359	Mango
SDW01476	Unknown	C7 H3 N2 O2 P	177.993	11.6004	Mango
SDW01477	Unknown	C7 H F3 N3 O P	230.981	0.731123	Mango
SDW01478	Unknown	unknown	85.0897	13.4551	Mango
SDW01479	Unknown	C19 H25 F4 O6 P	456.131	1.47409	Mango
SDW01480	MFCD00006862	C12 H13 N O2	203.094	3.31394	Mango
SDW01481	Unknown	C20 H37 F N4 O11	528.244	11.883	Mango
SDW01483	Unknown	C10 H4	124.032	0.28968	Mango
SDW01484	Unknown	unknown	81.9909	0.558675	Mango
SDW01485	cis-Resveratrol	C14 H12 O3	228.078	5.73684	Mango
SDW01486	Unknown	C9 H12 F2 O S	206.058	5.79615	Mango
SDW01487	Unknown	C19 H38 F N O7	411.263	14.2614	Mango
SDW01488	Unknown	C2 H7 N O7 S	188.993	8.26694	Mango
SDW01489	P-Benzylphosphonothioic diamide	C7 H11 N2 P S	185.988	8.92755	Mango
SDW01490	N,N'-Diheptyl-2-hydroxy-N,N'-dimethylmalonamide	C19 H38 N2 O3	342.288	9.37185	Mango
SDW01491	Unknown	C18 H34 F N O7	395.23	5.71127	Mango
SDW01494	Unknown	C6 H14 F N5 O2 S2	271.057	0.921339	Mango
SDW01495	Bensulfuron methyl	C16 H18 N4 O7 S	410.082	0.730711	Mango
SDW01496	Unknown	C8 H10 N4 O5 S	274.036	16.9165	Mango
SDW01497	Unknown	C3 H2 O5 S	149.962	17.391	Mango
SDW01499	Furaneol	C6 H8 O3	128.047	1.41684	Mango
SDW01500	Unknown	C19 H32 F3 N2 O3 P3	486.158	0.826315	Mango
SDW01501	Unknown	C19 H38 S	298.27	9.41106	Mango
SDW01502	Unknown	C21 H23 N2 P	334.159	11.7779	Mango
SDW01503	Unknown	C43 H70 S	618.519	12.3095	Mango
SDW01504	Unknown	C10 H12 F4 N O P S	301.032	0.916636	Mango
SDW01505	Coumarin	C9 H6 O2	146.037	3.58835	Mango
SDW01506	Unknown	C24 H24 F2 N2 O3 S	458.146	1.00489	Mango
SDW01509	MFCD00037215	C8 H14 N2 O5	218.09	0.813191	Mango
SDW01510	Unknown	C5 H12 P2 S	166.013	17.022	Mango
SDW01511	Kojic-Acid	C6 H6 O4	142.026	1.31754	Mango
SDW01512	Dodemorph	C18 H35 N O	281.271	11.2189	Mango
SDW01513	Unknown	C15 H6 F4 N2 O9 P2	495.949	16.4874	Mango
SDW01514	Unknown	C3 H9 F2 N2 O2 P	174.038	8.28228	Mango
SDW01515	Unknown	unknown	280.655	11.8488	Mango
SDW01518	Unknown	C8 H15 F3 O	184.107	5.85232	Mango
SDW01519	Unknown	C8 H15 F3 O	184.107	5.9689	Mango
SDW01520	N-[9-(alpha-D-Ribofuranosyl)-9H-purin-6-yl]-L-aspartic acid	C14 H17 N5 O8	383.107	2.95229	Mango
SDW01521	Unknown	C4 H5 F N4 S	160.022	1.26825	Mango
SDW01522	Unknown	C29 H42 N2 O3	466.319	11.5396	Mango
SDW01524	Di-Î±-linolenin	C39 H64 O5	612.475	13.0322	Mango
SDW01525	Unknown	C38 H70 N2 O2 S	618.519	13.3004	Mango
SDW01526	DI3050000	C7 H3 Cl N2 O2	181.989	16.7857	Mango
SDW01527	NP-011548	C18 H34 O3	320.232	10.53	Mango
SDW01528	Unknown	unknown	102.971	17.0233	Mango
SDW01529	Unknown	unknown	114.017	4.7463	Mango
SDW01530	(R)-() homocitric acid lactone	C7 H8 O6	187.084	1.06099	Mango
SDW01531	Unknown	C4 H4 N3 O4 P	188.993	8.67128	Mango
SDW01532	Unknown	C38 H69 F3 N5 O2 P	715.514	13.8594	Mango
SDW01533	NP-020921	C15 H20 O8	328.115	4.09052	Mango
SDW01534	Pyrimethanil	C12 H13 N3	199.111	8.16327	Mango
SDW01535	Unknown	C25 H47 F2 N2 O3 P	492.329	11.0507	Mango
SDW01536	Unknown	C7 H3 F N2 O5 S2	277.947	16.5001	Mango
SDW01537	Unknown	C6 H11 Cl N2 S	178.033	1.39653	Mango
SDW01538	Unknown	unknown	125.974	17.2034	Mango
SDW01539	Unknown	C26 H41 F3	410.318	12.8314	Mango
SDW01540	(12Z)-9,10,11-trihydroxyoctadec-12-enoic acid	C18 H34 O5	352.222	8.21593	Mango
SDW01541	Lauryldimethylamine oxide	C14 H31 N O	229.24	8.4249	Mango
SDW01542	Unknown	C3 H10 F N4 P S2	216.007	0.875848	Mango
SDW01544	Unknown	C14 H28 F3 N2 O P S3	424.106	1.31202	Mango
SDW01545	Unknown	C21 H25 N4 O8 P S	524.114	0.822419	Mango
SDW01547	Brilliant green	C27 H32 N2	362.281	10.9935	Mango
SDW01548	Unknown	unknown	125.974	17.0397	Mango
SDW01549	Unknown	unknown	84.0217	10.7227	Mango
SDW01550	7-Oxabicyclo[2.2.1]heptane-2,3-dicarboxylic acid	C8 H10 O5	186.053	0.741775	Mango
SDW01551	Unknown	C22 H37 F N4 O5	456.276	12.2371	Mango
SDW01552	Unknown	C3 H3 F2 N O6	186.993	10.5855	Mango
SDW01554	Tosylmethyl Isocyanide-	C9 H9 N O2 S	195.035	2.51663	Mango
SDW01555	3,4-Dimethoxyhydrocinnamic acid	C11 H14 O4	210.089	5.23308	Mango
SDW01556	Unknown	unknown	245.616	11.2057	Mango
SDW01557	Unknown	C18 H9 F2 N7	361.089	0.802356	Mango
SDW01558	Unknown	unknown	84.0217	4.94152	Mango
SDW01559	Unknown	C18 H34 F N O14	507.195	1.82936	Mango
SDW01560	(+/-)12(13)-DiHOME	C18 H34 O4	296.235	9.58438	Mango
SDW01561	Unknown	unknown	57.0584	0.747066	Mango
SDW01562	Unknown	C5 H3 F O8	209.981	16.6416	Mango
SDW01563	Unknown	C7 H4 F3 N4 O7 P	343.977	14.0321	Mango
SDW01564	Unknown	C4 H9 F4 N5	203.079	0.795305	Mango
SDW01566	Unknown	C8 H24 F N8 O4 P	346.164	11.0321	Mango
SDW01567	Vanillin	C8 H8 O3	152.047	4.71829	Mango
SDW01568	Unknown	C14 H20 O5 S2	332.074	1.15281	Mango
SDW01569	C20 phytosphingosine	C20 H43 N O3	345.324	9.20689	Mango
SDW01570	Unknown	C32 H40 F2	462.31	12.2025	Mango
SDW01571	Unknown	C23 H43 F O3 S	418.292	11.3535	Mango
SDW01572	Unknown	C16 H35 N O	257.271	9.49288	Mango
SDW01573	Unknown	unknown	67.9906	0.877195	Mango
SDW01574	TREPROSTINIL HEXADECYL ESTER	C39 H66 O5	614.49	13.5412	Mango
SDW01575	1,2:5,6-Dianhydro-3,4-dideoxy-1-[12-(5-methyl-2-oxo-2,5-dihydro-3-furanyl)dodecyl]-6-[(3Z)-3-tetradecen-1-yl]hexitol	C37 H64 O4	572.48	14.7908	Mango
SDW01576	2-(3-Hydroxy-3,7,11,15-tetramethylhexadecyl)-3,5,6-trimethyl-1,4-benzoquinone	C29 H50 O3	446.375	13.1799	Mango
SDW01577	6-Methyl-1,2,4-triazine-3,5-dithiol	C4 H5 N3 S2	158.992	16.8551	Mango
SDW01578	Unknown	C10 H3 F2 N O	191.018	16.5382	Mango
SDW01580	Unknown	C30 H68 F2 N8 O S2	658.493	16.6562	Mango
SDW01581	Linoleamide	C18 H33 N O	279.256	10.9653	Mango
SDW01582	Acetamide	C2 H5 N O	59.0369	9.61603	Mango
SDW01584	3-Methylbutanoic acid	C5 H10 O2	102.069	6.06899	Mango
SDW01585	Unknown	C29 H62 F N8 P	572.48	12.8047	Mango
SDW01586	N-Acetylvaline	C7 H13 N O3	159.089	0.749545	Mango
SDW01587	DMNB	C9 H9 N O5	211.048	4.83043	Mango
SDW01588	NP-014287	C18 H32 O3	278.224	9.57324	Mango
SDW01589	Dibutyl Phthalate	C16 H22 O4	278.151	0.209544	Mango
SDW01590	Unknown	C26 H48 F6 N O5 P	599.317	11.0802	Mango
SDW01591	Unknown	C17 H37 F2 N9 O6	501.282	11.2189	Mango
SDW01592	1-Methylamino-1-(3,4-Methylenedioxyphenyl)Propane	C11 H15 N O2	193.11	2.10648	Mango
SDW01593	NP-020705	C17 H24 O8	378.129	6.75667	Mango
SDW01594	Unknown	C6 H10 F2 N2 O4 S2	276.006	17.1631	Mango
SDW01595	Unknown	C4 H5 N2 O2 P S	175.982	1.05688	Mango
SDW01596	Brilliant green	C27 H32 N2	362.281	10.8197	Mango
SDW01598	2-Acetyl-4-hydroxyphenyl beta-D-glucopyranoside	C14 H18 O8	314.1	2.83911	Mango
SDW01599	Unknown	C9 H8 Cl F N6 O3	302.033	0.63	Mango
SDW01600	Unknown	C7 H8 F N4 O3 P	246.032	1.25952	Mango
SDW01601	Unknown	unknown	641.507	15.8784	Mango
SDW01603	Unknown	C7 H11 F4 N O4	249.063	2.22694	Mango
SDW01604	Unknown	C6 H16 F N2 O4 P	230.083	16.7013	Mango
SDW01605	1-Linoleoyl glycerol	C21 H38 O4	336.266	13.9269	Mango
SDW01606	1-(4-nitrophenyl)piperidine	C11 H14 N2 O2	189.079	1.67774	Mango
SDW01607	2-Oxobutyric acid	C4 H6 O3	102.032	0.879224	Mango
SDW01608	Linamarin	C10 H17 N O6	247.105	4.28956	Mango
SDW01609	Unknown	C6 H8 F4 N8 O4 P2 S	425.98	8.85564	Mango
SDW01610	Unknown	unknown	85.0534	1.25565	Mango
SDW01611	TREPROSTINIL HEXADECYL ESTER	C39 H66 O5	614.49	13.2445	Mango
SDW01612	Unknown	C3 H7 F4 N6 O2 P3 S	359.95	16.6361	Mango
SDW01613	GSK1614235 FREE BASE	C28 H45 N3 O7	536.295	10.3461	Mango
SDW01614	N-Benzoylglutamic acid	C12 H13 N O5	251.079	4.39826	Mango
SDW01616	Cafestol	C20 H28 O3	316.201	10.1156	Mango
SDW01617	Cafestol	C20 H28 O3	316.201	10.2724	Mango
SDW01618	Unknown	C21 H39 F2 N3 O3 S	451.269	10.5172	Mango
SDW01619	alpha-ketoadipic acid	C6 H8 O5	160.037	1.34622	Mango
SDW01621	Unknown	C2 H4 F2 O7	177.993	11.1937	Mango
SDW01623	Unknown	C8 H2 Cl N3 O	190.989	17.1241	Mango
SDW01624	Unknown	unknown	69.0061	0.98756	Mango
SDW01625	Unknown	C5 H11 F N4 O7 P2	320.009	16.6846	Mango
SDW01626	(12Z)-9,10,11-trihydroxyoctadec-12-enoic acid	C18 H34 O5	330.24	8.38753	Mango
SDW01627	2-Oxiranylmethyl (9Z,12Z,15Z)-9,12,15-octadecatrienoate	C21 H34 O3	334.25	14.7861	Mango
SDW01628	Glutaric anhydride	C5 H6 O3	114.032	0.26241	Mango
SDW01629	Unknown	C5 H10 F4 N2 O S	222.046	2.95546	Mango
SDW01630	L-Tyrosine	C9 H11 N O3	181.074	5.02053	Mango
SDW01631	Unknown	C13 H24 F N O6 S	341.132	0.786607	Mango
SDW01634	L-Ethionine	C6 H13 N O2 S	163.066	1.06851	Mango
SDW01635	Unknown	C5 H10 O P2	148.021	1.52865	Mango
SDW01636	Unknown	C9 H2 Cl F N2 O9 P2 S	429.863	0.67662	Mango
SDW01637	trans-3-Indoleacrylic acid	C11 H9 N O2	187.063	4.75925	Mango
SDW01638	2-(4-Methylphenyl)-1,3-thiazolidine-4-carboxylic acid	C11 H13 N O2 S	223.066	2.52203	Mango
SDW01639	Unknown	C4 H N O4 S	158.963	1.11259	Mango
SDW01640	Unknown	C19 H27 F3 N2 O4	404.191	11.4268	Mango
SDW01641	2-[2-(Octylamino)ethoxy]ethanol	C12 H27 N O2	217.204	6.17451	Mango
SDW01642	Unknown	C17 H27 F N4 O3	354.208	12.0168	Mango
SDW01643	Unknown	C5 H7 N7 O2 S	229.038	0.825578	Mango
SDW01644	trimethadione	C6 H9 N O3	143.058	17.0417	Mango
SDW01645	(2R)-2-Î²-GDIMBOA	C15 H19 N O10	373.1	4.83649	Mango
SDW01646	(2Z)-5-(1,2,4a,5-tetramethyl-7-oxo-1,2,3,4,4a,7,8,8a-octahydronaphthalen-1-yl)-3-methylpent-2-enoic acid	C20 H30 O3	340.201	8.96934	Mango
SDW01647	Unknown	unknown	73.0535	0.811043	Mango
SDW01648	Unknown	C8 H10 F3 P	194.046	11.4326	Mango
SDW01649	Unknown	unknown	109.025	6.13238	Mango
SDW01650	benzyl oleate	C25 H40 O2	372.302	12.1382	Mango
SDW01651	Unknown	unknown	57.0585	0.683614	Mango
SDW01652	Unknown	unknown	57.0586	0.771827	Mango
SDW01653	Acycloguanosine	C8 H11 N5 O3	225.086	1.29902	Mango
SDW01654	Unknown	C22 H39 F3 O5	440.274	11.3074	Mango
SDW01656	Unknown	C9 H16 N2 O S2	232.071	5.36838	Mango
SDW01657	Unknown	C35 H67 F N2 O2 S2	630.462	15.074	Mango
SDW01659	4-Hydroxybenzoic acid	C7 H6 O3	138.032	2.82904	Mango
SDW01660	6-(2-chloroanilino)-4-oxo-2-(4-pyridyl)-3,4-dihydro-2H-1,3-thiazine-5-carbonitrile	C16 H11 Cl N4 O S	342.288	9.22155	Mango
SDW01662	Unknown	C2 H3 F3 N6 O2	200.026	17.049	Mango
SDW01663	Vitexin 2"-O-p-coumarate	C30 H26 O12	578.142	3.63567	Mango
SDW01664	Unknown	C4 H7 N2 O3 P S	193.992	0.882714	Mango
SDW01665	Desthiobiotin	C10 H18 N2 O3	214.131	0.826471	Mango
SDW01667	Dimethyl 5-{[ethoxy(oxo)acetyl]amino}isophthalate	C14 H15 N O7	309.084	4.51229	Mango
SDW01668	(-)-Epicatechin	C15 H14 O6	290.079	4.7351	Mango
SDW01669	Methoxyacetyl fentanyl	C22 H28 N2 O2	352.222	8.37706	Mango
SDW01670	Unknown	C7 H2 N3 O2 P	190.989	16.8758	Mango
SDW01671	[Similar to: (2R,3R,4S,5S,6R)-2-{[1,7-bis(4-hydroxyphenyl)heptan-3-yl]oxy}-6-(hydroxymethyl)oxane-3,4,5-triol; ΔMass: -291.2048 Da]	C5 H6 N3 O2 P	171.021	16.8045	Mango
SDW01675	10,12-PENTACOSADIYNOIC ACID	C25 H42 O2	374.318	12.6403	Mango
SDW01676	Unknown	C17 H16 F3 N5 O2	379.126	4.64799	Mango
SDW01677	Unknown	C10 H9 F N6 O S	280.055	0.717551	Mango
SDW01678	Unknown	C16 H32 F3 N O11	471.194	0.846316	Mango
SDW01679	Norepinephrine	C8 H11 N O3	169.053	2.77085	Mango
SDW01680	2-fluoro-N-[[(4S,5S)-2-[(2S)-1-hydroxypropan-2-yl]-8-(3-methoxyprop-1-ynyl)-4-methyl-1,1-dioxo-4,5-dihydro-3H-6,1$l^{6},2-benzoxathiazocin-5-yl]methyl]-N-methylbenzamide	C26 H31 F N2 O6 S	518.19	2.79336	Mango
SDW01681	N-(4-tert-Butylbenzyl)-N-methyl-L-leucyl-O-benzyl-N-tert-butyl-L-tyrosinamide	C38 H53 N3 O3	600.417	12.0537	Mango
SDW01682	Unknown	C9 H30 N9 O2 P	327.226	14.8687	Mango
SDW01683	Unknown	C7 H3 N6 O P	218.01	0.628633	Mango
SDW01686	Unknown	unknown	76.9622	15.1591	Mango
SDW01689	Unknown	unknown	279.647	11.3395	Mango
SDW01690	Unknown	C3 H3 N2 O3 P S2	209.933	0.715426	Mango
SDW01691	Unknown	unknown	82.0425	0.897633	Mango
SDW01692	NP-014175	C20 H28 O3	316.203	8.79437	Mango
SDW01693	Unknown	C35 H64 N6 O3	616.506	13.1198	Mango
SDW01694	Maleic Hydrazide	C4 H4 N2 O2	112.028	0.967949	Mango
SDW01695	Unknown	C H3 N2 O3 P S	153.961	0.571847	Mango
SDW01696	Unknown	C8 H2 Cl2 F3 N6 O14 P3	625.817	0.688322	Mango
SDW01697	1,9-Dihydroxy-2-(3-methyl-2-buten-1-yl)-6H-[1]benzofuro[3,2-c]chromen-3-yl hexopyranosiduronic acid	C26 H26 O11	514.147	7.29336	Mango
SDW01698	Unknown	C7 H3 F	106.021	17.3501	Mango
SDW01699	Unknown	unknown	70.0426	1.25978	Mango
SDW01700	Unknown	C12 H18 O12	354.079	0.864863	Mango
SDW01701	Unknown	C20 H27 F3 N4 O4	444.199	4.43741	Mango
SDW01702	Unknown	C26 H52 F N O5 S	509.356	11.2869	Mango
SDW01703	Unknown	C2 H2 O4 S	121.968	16.7986	Mango
SDW01704	Leucylproline	C11 H20 N2 O3	228.147	2.95531	Mango
SDW01705	2-[(3R,4S)-3-{[5-(Cyclohexylmethyl)-1,2-oxazol-3-yl]methyl}-4-piperidinyl]-N-(3-pyridinylmethyl)acetamide	C24 H34 N4 O2	410.264	9.25226	Mango
SDW01706	2,6-Dimethyl-4,10-dioxatricyclo[5.2.1.0~2,6~]decane-3,5-dione	C10 H12 O4	196.073	4.26339	Mango
SDW01707	O,S-Dimethyl ethylphosphonothioate	C4 H11 O2 P S	154.022	16.9186	Mango
SDW01708	Unknown	C11 H15 F3 N4 O4	324.105	1.02523	Mango
SDW01709	2287460	C23 H40 O2	348.302	12.5615	Mango
SDW01710	Unknown	C2 H2 N5 O3 P	174.99	17.1935	Mango
SDW01711	Monoolein	C21 H40 O4	356.292	11.6594	Mango
SDW01712	Unknown	C H2 F2 N4 O4	172.005	16.8968	Mango
SDW01714	Unknown	C26 H61 F2 N10 P	582.481	13.3508	Mango
SDW01715	Glutamic Acid	C5 H9 N O4	147.053	1.27592	Mango
SDW01716	Unknown	C19 H33 F3 N2 O4	410.238	12.589	Mango
SDW01717	Unknown	C17 H27 F N4 O3	354.208	11.7552	Mango
SDW01718	Hexylresorcinol	C12 H18 O2	194.13	8.11594	Mango
SDW01719	Glutaric anhydride	C5 H6 O3	114.032	1.62268	Mango
SDW01721	4-Methylumbelliferyl-α-D-glucopyranoside	C16 H18 O8	338.1	5.05184	Mango
SDW01722	4,4-Difluoro-3-oxobutanenitrile	C4 H3 F2 N O	118.078	0.215711	Mango
SDW01723	Furano [ 2",3":6,7 ] aurone	C17 H10 O3	262.063	2.25989	Mango
SDW01725	Unknown	C8 H12 N2 O3 P2	246.031	0.321839	Mango
SDW01726	Unknown	unknown	254.621	11.1941	Mango
SDW01727	Unknown	unknown	120.01	16.6688	Mango
SDW01728	Unknown	C12 H3 N O3	209.011	16.9868	Mango
SDW01729	Unknown	C11 H21 F O3 S	252.12	1.46515	Mango
SDW01730	Guanine	C5 H5 N5 O	151.049	1.12843	Mango
SDW01731	Unknown	C26 H49 F O2	412.37	14.3141	Mango
SDW01732	Unknown	unknown	79.014	1.18095	Mango
SDW01733	Unknown	C4 H6 F N2 O4 P	196.005	16.9221	Mango
SDW01734	Unknown	C19 H41 N3 O6	407.301	12.0516	Mango
SDW01735	4-chloro-5-morpholino-2-quinoxalin-2-ylpyridazin-3(2H)-one	C16 H14 Cl N5 O2	343.083	0.899288	Mango
SDW01737	N-[2-(4-Hydroxy-4-methyl-2-oxo-1-oxa-3-azaspiro[4.5]dec-3-yl)ethyl]-1-methyl-1H-pyrazole-5-carboxamide	C16 H24 N4 O4	336.179	4.85625	Mango
SDW01738	4,6-Dimethyl-5-nitro-2-oxo-1,2-dihydro-3-pyridinecarbonitrile	C8 H7 N3 O3	193.049	0.583229	Mango
SDW01739	Unknown	C19 H41 N3 O6	407.3	11.9635	Mango
SDW01740	Unknown	C14 H29 N5 O3	315.226	15.3491	Mango
SDW01741	Unknown	C26 H32 F5 N3 O	497.249	11.2361	Mango
SDW01742	Unknown	C4 H6 Cl N2 O4 P S	243.946	9.12422	Mango
SDW01743	4-benzyltoluene	C14 H14	183.066	11.1899	Mango
SDW01744	Caprolactam	C6 H11 N O	113.084	3.16839	Mango
SDW01745	Unknown	C21 H29 F2 N2 O3 P	426.188	5.68164	Mango
SDW01746	Unknown	C7 H14 F3 O4 P3 S	343.977	13.6143	Mango
SDW01747	Unknown	unknown	82.0789	6.5228	Mango
SDW01748	Unknown	unknown	633.532	14.8317	Mango
SDW01749	Unknown	C11 H9 Cl N6 S2	324.003	0.618174	Mango
SDW01750	1-Oxo-2,3-dihydro-1H-phospholium	C4 H6 O P	100.001	0.177553	Mango
SDW01751	Unknown	C4 H10 N4 O3 S	194.046	16.4339	Mango
SDW01752	Docosahexaenoic acid	C22 H32 O2	328.235	12.3074	Mango
SDW01753	Unknown	C14 H19 F2 N O5 S	351.095	3.64585	Mango
SDW01754	Benzenol	C6 H6 O	94.0423	1.17415	Mango
SDW01755	α-Linolenic acid	C18 H30 O2	278.224	11.4227	Mango
SDW01756	Unknown	C4 H10 F3 N3 O S3	268.994	12.7688	Mango
SDW01757	Unknown	unknown	98.5243	0.957168	Mango
SDW01758	Unknown	C34 H70 N2 O7	618.519	12.8811	Mango
SDW01759	Unknown	C12 H19 F2 N2 O4 P	324.105	0.879239	Mango
SDW01761	Chrysin 5-xyloside	C20 H18 O8	386.1	4.76364	Mango
SDW01762	Unknown	C13 H22 F4 O3 P2	364.098	12.0583	Mango
SDW01763	2'-deoxymugineic acid	C12 H20 N2 O7	304.126	0.72837	Mango
SDW01764	Unknown	unknown	103.956	0.518285	Mango
SDW01765	Unknown	unknown	97.0249	1.16436	Mango
SDW01766	Unknown	C12 H9 Cl N3 P	261.023	0.651782	Mango
SDW01767	Unknown	C7 H6 F5 O7 P S	359.95	16.8106	Mango
SDW01768	Unknown	C5 H6 N3 O2 P	171.021	17.0041	Mango
SDW01769	benzyl oleate	C25 H40 O2	372.302	12.3146	Mango
SDW01770	Flusulfamide	C13 H7 Cl2 F3 N2 O4 S	413.946	16.7681	Mango
SDW01771	Unknown	C4 H N O4 S	158.963	16.9962	Mango
SDW01773	Unknown	unknown	180.56	1.30018	Mango
SDW01774	Hydroquinone	C6 H6 O2	110.037	1.30526	Mango
SDW01775	Unknown	C3 H2 F3 P S	157.957	17.1456	Mango
SDW01776	Unknown	C32 H65 F2 N4 O P	590.488	15.1876	Mango
SDW01777	Unknown	C19 H31 N2 O2 P	350.213	11.5909	Mango
SDW01778	Unknown	C9 H2 F N6 O7 P	355.97	16.5475	Mango
SDW01780	Unknown	C8 H11 F2 N2 P	204.063	5.72943	Mango
SDW01781	Unknown	C2 H2 F2 O8	191.972	17.0348	Mango
SDW01782	Unknown	C26 H33 N7 O2	475.269	10.5267	Mango
SDW01783	trans-4-Hydroxy-L-proline	C5 H9 N O3	131.058	0.819928	Mango
SDW01785	3,4,5-Trimethoxy-N-(6-methyl-2-pyridinyl)benzamide	C16 H18 N2 O4	302.126	1.04441	Mango
SDW01786	2-Oxobutyric acid	C4 H6 O3	102.032	0.187195	Mango
SDW01787	Unknown	C22 H33 F N4 O5	452.244	11.1116	Mango
SDW01788	10,12-PENTACOSADIYNOIC ACID	C25 H42 O2	374.318	12.4692	Mango
SDW01789	Butafenacil	C20 H18 Cl F3 N2 O6	473.165	3.06245	Mango
SDW01791	Unknown	C3 H5 N2 O5 P	179.993	8.27434	Mango
SDW01792	Niacin	C6 H5 N O2	123.032	0.783922	Mango
SDW01793	Unknown	C6 H19 N8 O6 P	330.117	0.903297	Mango
SDW01794	Unknown	C8 H6 F N2 O P3 S	289.94	16.7395	Mango
SDW01795	Unknown	C9 H13 F N4 O2 S2	292.046	16.8963	Mango
SDW01796	NP-002322	C18 H32 O4	334.211	9.45409	Mango
SDW01797	Unknown	C6 H9 N3 O3 P2	233.011	17.3015	Mango
SDW01799	(2Z,4Z)-6-Amino-2,4-diimino-5-nitro-1,3(2H,4H)-pyrimidinediol	C4 H6 N6 O4	202.045	4.13086	Mango
SDW01800	Unknown	C18 H39 F N7 O6 P	499.267	10.8135	Mango
SDW01801	Docosahexaenoic acid	C22 H32 O2	328.235	12.5903	Mango
SDW01802	[Similar to: (2R,3R,4S,5S,6R)-2-{[1,7-bis(4-hydroxyphenyl)heptan-3-yl]oxy}-6-(hydroxymethyl)oxane-3,4,5-triol; ΔMass: -291.2393 Da]	C3 H3 N5 P2	170.986	17.1766	Mango
SDW01804	Unknown	C18 H35 N4 O16 P	594.179	6.12417	Mango
SDW01805	Unknown	C9 H13 Cl N2 O P2	262.02	0.650564	Mango
SDW01807	Unknown	C30 H46 F2 O12	636.297	11.0172	Mango
SDW01808	4-(2,3-dihydro-1,4-benzodioxin-6-yl)-1,2-diphenylbut-2-ene-1,4-dione	C24 H18 O4	392.107	5.87516	Mango
SDW01809	Unknown	C4 H10 F N4 O P	180.057	16.9098	Mango
SDW01811	Thiamine	C12 H16 N4 O S	264.104	0.70639	Mango
SDW01812	5'-O-beta-D-Glucosylpyridoxine	C14 H21 N O8	331.126	1.12838	Mango
SDW01813	Unknown	C14 H40 N9 O7 P	477.279	13.8441	Mango
SDW01814	Unknown	unknown	274.625	11.1478	Mango
SDW01815	Unknown	C4 H10 F N4 O P	180.058	17.1104	Mango
SDW01818	Unknown	C2 H2 F2 N4 S	151.998	16.8448	Mango
SDW01819	N-Benzyl-2-cyanoacetamide	C10 H10 N2 O	174.079	1.7056	Mango
SDW01820	Unknown	C5 H3 F O3 P2	191.954	0.88244	Mango
SDW01821	Picolinic acid	C6 H5 N O2	124.064	1.03709	Mango
SDW01822	Unknown	unknown	53.9789	16.7274	Mango
SDW01823	Unknown	C3 H6 Cl F3 N6 O5 P2	359.951	16.475	Mango
SDW01824	3,5-Heptadiyn-2-one	C7 H6 O	106.042	1.82435	Mango
SDW01825	Unknown	C34 H70 N2 O7	618.519	12.6091	Mango
SDW01826	Metsulfuron-methyl	C14 H15 N5 O6 S	381.075	0.982311	Mango
SDW01828	2030114	C40 H54 O	550.417	12.8224	Mango
SDW01829	Unknown	C24 H39 N6 O10 P	602.247	6.56118	Mango
SDW01830	Unknown	C19 H37 P S	328.234	15.541	Mango
SDW01831	Unknown	C4 H7 N2 O3 P	162.019	0.319657	Mango
SDW01832	Unknown	C18 H43 F6 N10 P	544.333	11.3343	Mango
SDW01833	Unknown	C10 H2 O	138.011	1.79151	Mango
SDW01834	Unknown	C2 H4 F3 N3	127.035	1.22068	Mango
SDW01835	Benzaldehyde	C7 H6 O	106.042	1.66164	Mango
SDW01836	Unknown	unknown	102.971	16.5484	Mango
SDW01837	Unknown	C4 H10 N8 O7	282.067	2.94485	Mango
SDW01838	Unknown	unknown	120.01	16.6134	Mango
SDW01839	Kojic-Acid	C6 H6 O4	142.026	0.859489	Mango
SDW01840	Unknown	C H F2 N8 O4 P	257.983	17.2456	Mango
SDW01841	Sinapinic acid	C11 H12 O5	206.058	5.15031	Mango
SDW01842	α-Lactose	C12 H22 O11	359.142	1.31041	Mango
SDW01843	N-(4-tert-Butylbenzyl)-N-methyl-L-leucyl-O-benzyl-N-tert-butyl-L-tyrosinamide	C38 H53 N3 O3	600.417	11.7887	Mango
SDW01844	Unknown	C5 H7 F5 O2 S	226.009	16.9681	Mango
SDW01845	MFCD01320384	C24 H49 N O3	399.371	11.3178	Mango
SDW01846	Unknown	C21 H41 N2 O11 P	528.244	12.1156	Mango
SDW01847	Unknown	C40 H67 F O S	614.49	13.0655	Mango
SDW01848	Unknown	C6 H16 F N2 O4 P	230.083	16.5208	Mango
SDW01849	2,4-dihydroxyheptadec-16-en-1-yl acetate	C19 H36 O4	350.243	11.129	Mango
SDW01851	Unknown	C H2 Cl F2 N4 O2 P S	237.929	16.7171	Mango
SDW01852	Unknown	C6 H11 Cl N2 S	178.033	0.498233	Mango
SDW01853	Furfural	C5 H4 O2	96.0216	4.94039	Mango
SDW01854	Unknown	unknown	277.631	10.3961	Mango
SDW01855	N-[2-(3,4-Diethoxyphenyl)ethyl]-4-morpholinecarboxamide	C17 H26 N2 O4	322.188	11.1905	Mango
SDW01856	NP-006888	C13 H24 O4	226.157	8.116	Mango
SDW01857	Unknown	C5 H8 N3 O4 P	205.025	17.721	Mango
SDW01860	Unknown	C6 H12 F4 O8 P2	349.994	11.6593	Mango
SDW01861	Unknown	C12 H27 N9 O9 S	473.165	2.90659	Mango
SDW01862	Clenbuterol	C12 H18 Cl2 N2 O	276.078	1.46778	Mango
SDW01863	Nicotinic acid	C6 H5 N O2	123.032	1.01742	Mango
SDW01864	Unknown	C12 H23 O P S	246.121	2.21137	Mango
SDW01865	β-Alanine	C3 H7 N O2	89.0482	4.9337	Mango
SDW01866	BMK methyl glycidate	C11 H12 O3	192.078	4.30625	Mango
SDW01867	Unknown	C6 H11 Cl F2 N6 O3	288.054	0.630416	Mango
SDW01868	11-piperidino-2,3-dihydro-1H-cyclopenta[4,5]pyrido[1,2-a]benzimidazole-4-carbonitrile	C20 H20 N4	316.171	11.1918	Mango
SDW01869	1,9-Dihydroxy-2-(3-methyl-2-buten-1-yl)-6H-[1]benzofuro[3,2-c]chromen-3-yl hexopyranosiduronic acid	C26 H26 O11	514.147	7.43994	Mango
SDW01870	Unknown	C7 H Cl F2 O3 S	237.929	16.5393	Mango
SDW01871	Unknown	unknown	119.083	0.849021	Mango
SDW01872	Unknown	C3 H3 N5 P2	170.986	16.991	Mango
SDW01873	Toxopyrimidine	C6 H9 N3 O	138.994	16.4324	Mango
SDW01874	Unknown	C5 H14 F N9 O5 P2 S2	425.001	0.989716	Mango
SDW01875	Unknown	C6 H12 N2 O2 P2	206.037	17.2031	Mango
SDW01876	Unknown	C11 H18 F N2 O6 P	324.088	7.57502	Mango
SDW01877	Unknown	unknown	133.099	1.06854	Mango
SDW01878	Unknown	C35 H60 N6 O3	612.475	13.3197	Mango
SDW01880	Unknown	C27 H36 N6 S	476.271	13.5166	Mango
SDW01881	(4R)-4-[(Methylsulfanyl)methyl]-1,3-oxazolidine-2,5-dione	C5 H7 N O3 S	162.011	6.52872	Mango
SDW01882	Unknown	C24 H48 F N3 O7	509.348	11.5168	Mango
SDW01883	C16 phytosphingosine	C16 H35 N O3	289.261	8.51954	Mango
SDW01884	Unknown	unknown	85.946	17.2961	Mango
SDW01885	Unknown	C11 H2 Cl N4 O2 P S	319.932	16.6553	Mango
SDW01886	6-methyl-8-{[5-(2-naphthyl)-1,3,4-oxadiazol-2-yl]methoxy}[1,2,4]triazolo[4,3-b]pyridazine	C19 H14 N6 O2	336.141	5.62551	Mango
SDW01887	Unknown	C15 H23 N3 O7 P2 S2	483.045	3.4976	Mango
SDW01888	Unknown	C5 H11 F N4 O7 P2	320.009	16.4778	Mango
SDW01889	ortho-Phthalaldehyde	C8 H6 O2	134.037	0.829436	Mango
SDW01890	TREPROSTINIL HEXADECYL ESTER	C39 H66 O5	614.49	12.8885	Mango
SDW01892	Unknown	C6 H11 F2 N3 O6 S2	323.006	1.35742	Mango
SDW01893	Unknown	C7 H11 F3 N4 O4	272.074	1.30255	Mango
SDW01894	Unknown	C7 H9 F N4 O11 S	375.999	16.4977	Mango
SDW01895	Unknown	C18 H34 F3 N	321.264	9.53321	Mango
SDW01896	NP-020634	C21 H30 O6	400.189	11.8056	Mango
SDW01897	Unknown	C17 H39 N8 O2 P	418.292	11.1009	Mango
SDW01898	Unknown	C25 H41 F O3 S	440.274	11.0846	Mango
SDW01899	Unknown	C37 H70 F2 O S	600.511	15.4982	Mango
SDW01900	NP-002322	C18 H32 O4	296.255	9.48185	Mango
SDW01901	Unknown	C3 H F N5 O P	172.99	17.1163	Mango
SDW01903	N-[(4-Acetamidophenyl)sulfonyl]serine	C11 H14 N2 O6 S	302.057	2.77768	Mango
SDW01904	Unknown	C16 H20 F3 N3 O5 P2	453.084	3.48175	Mango
SDW01905	Unknown	C9 H17 F2 N O4 S	273.084	0.873339	Mango
SDW01906	Selsun	S Se	111.889	0.687184	Mango
SDW01907	Unknown	C3 H7 F4 N6 O12 P	425.98	11.3935	Mango
SDW01908	Unknown	C5 H5 F4 N2 O2 P	232.003	2.23706	Mango
SDW01909	Unknown	C6 H7 F2 N2 P	176.032	0.833677	Mango
SDW01910	1-(4-(((3S,3'R,4'S,5'S,6'R)-3',4',5'-TRIHYDROXY-6'-(HYDROXYMETHYL)SPIRO(1H-ISOBENZOFURAN-3,2'-TETRAHYDROPYRAN)-5-YL)METHYL)PHENYL)ETHANONE	C22 H24 O7	400.152	6.09225	Mango
SDW01912	N-[9-(alpha-D-Ribofuranosyl)-9H-purin-6-yl]-L-aspartic acid	C14 H17 N5 O8	383.107	2.73687	Mango
SDW01913	Unknown	unknown	53.9789	17.0366	Mango
SDW01914	Unknown	C14 H35 N9 O P2	407.244	13.6411	Mango
SDW01915	1-(4-(((3S,3'R,4'S,5'S,6'R)-3',4',5'-TRIHYDROXY-6'-(HYDROXYMETHYL)SPIRO(1H-ISOBENZOFURAN-3,2'-TETRAHYDROPYRAN)-5-YL)METHYL)PHENYL)ETHANONE	C22 H24 O7	400.152	6.29202	Mango
SDW01916	Oglufanide	C16 H19 N3 O5	333.132	4.27176	Mango
SDW01917	Unknown	C7 H4 F3 N4 O7 P	343.977	13.2395	Mango
SDW01918	Unknown	C24 H36 N4 S	412.267	11.6609	Mango
SDW01919	1-{[(2R,3S,4R,5S)-3,4-Dihydroxy-5-{2-[(2R)-2-(methoxymethyl)-1-pyrrolidinyl]-2-oxoethyl}tetrahydro-2-furanyl]methyl}-3-(3-fluorophenyl)urea	C20 H28 F N3 O6	447.186	3.52576	Mango
SDW01920	Unknown	C13 H24 F N O3 S	293.147	0.961872	Mango
SDW01921	Ethyl linolenate	C20 H34 O2	306.255	12.1077	Mango
SDW01922	1-O-(1Z-Tetradecenyl)-2-(9Z-octadecenoyl)-sn-glycerol	C35 H66 O4	550.495	15.9123	Mango
SDW01923	Unknown	unknown	104.103	11.3602	Mango
SDW01924	persin	C23 H40 O4	380.292	10.1129	Mango
SDW01925	Unknown	C6 H5 Cl F2 N2 O5 P2	319.932	16.3671	Mango
SDW01926	Unknown	C2 H7 N O6	141.028	1.01656	Mango
SDW01927	Unknown	C4 H F O7	179.971	13.9433	Mango
SDW01928	[Similar to: (2R,3R,4S,5S,6R)-2-{[1,7-bis(4-hydroxyphenyl)heptan-3-yl]oxy}-6-(hydroxymethyl)oxane-3,4,5-triol; ΔMass: -291.2393 Da]	C4 H2 F4 N P	170.986	17.3988	Mango
SDW01929	Unknown	C39 H62 F2 O2	600.472	14.8606	Mango
SDW01931	Unknown	C8 H7 F3 O2 S4	319.928	17.0966	Mango
SDW01932	Unknown	unknown	118.972	17.1615	Mango
SDW01933	[Similar to: 2-{2-[(2Z)-pent-2-en-1-yl]-3-{[3,4,5-trihydroxy-6-(hydroxymethyl)oxan-2-yl]oxy}cyclopentyl}acetic acid; ΔMass: -256.2222 Da]	unknown	117.972	0.230034	Mango
SDW01934	Unknown	C2 H7 N5 O4	165.051	0.939175	Mango
SDW01935	L-Glutathione (reduced)	C10 H17 N3 O6 S	307.083	0.977159	Mango
SDW01936	3',4'-Methylenedioxyfurano [ 2",3":6,7 ] aurone	C18 H10 O5	306.052	1.25622	Mango
SDW01938	Unknown	C5 H7 N3 O3 P2	218.996	4.69249	Mango
SDW01939	Unknown	C19 H33 F3 N2 O4	410.238	12.4153	Mango
SDW01940	2-Isopropyl-5-methylcyclohexyl (2Z)-chloro(phenylhydrazono)acetate	C18 H25 Cl N2 O2	336.159	11.7625	Mango
SDW01941	Unknown	C H N2 O3 P	119.972	9.32764	Mango
SDW01942	Unknown	unknown	97.0249	0.823482	Mango
SDW01943	Unknown	C6 H9 F N4 O S2	236.02	16.8513	Mango
SDW01944	Unknown	C20 H37 F3 N2 O6	458.261	11.3752	Mango
SDW01945	Unknown	C14 H33 F2 N5 O4	373.25	11.3761	Mango
SDW01946	Unknown	unknown	70.0426	0.868441	Mango
SDW01947	NP-014517	C14 H18 O9	330.094	3.29756	Mango
SDW01948	7-Methoxy-4H-chromen-4-one	C10 H8 O3	176.047	7.20053	Mango
SDW01949	N-{[(1S,4S,6S)-4-{2-[Benzyl(methyl)amino]-2-oxoethyl}-6-isopropyl-3-methyl-2-cyclohexen-1-yl]methyl}isonicotinamide	C27 H35 N3 O2	415.26	9.62733	Mango
SDW01950	Unknown	unknown	85.0533	0.799873	Mango
SDW01951	Unknown	C3 H2 F N4 O3 P S3	287.901	17.1338	Mango
SDW01952	Unknown	C10 H11 F O5 S2	294.003	17.2404	Mango
SDW01954	Unknown	C5 H6 N6 O4 P2	275.993	16.7985	Mango
SDW01956	Unknown	C H2 F2 N4 O4	172.005	16.7353	Mango
SDW01957	Boc-Gly-OH	C7 H13 N O4	175.084	0.758585	Mango
SDW01958	Unknown	C33 H66 F4 N2 O P2	644.462	12.973	Mango
SDW01959	1-(4-(((3S,3'R,4'S,5'S,6'R)-3',4',5'-TRIHYDROXY-6'-(HYDROXYMETHYL)SPIRO(1H-ISOBENZOFURAN-3,2'-TETRAHYDROPYRAN)-5-YL)METHYL)PHENYL)ETHANONE	C22 H24 O7	400.152	5.67228	Mango
SDW01960	Unknown	C14 H22 F N2 O5 P S2	412.068	2.80422	Mango
SDW01962	MA4000000	C5 H7 N O2	113.048	0.987805	Mango
SDW01963	Unknown	C8 H19 N5 O5	265.138	11.2978	Mango
SDW01964	NP-020521	C18 H32 O3	278.224	10.5548	Mango
SDW01965	Unknown	C18 H25 N O12	447.137	3.06024	Mango
SDW01966	Diethyl (5Z,12Z)-3,3,10,10-tetramethyl-7,14-dioxo-1,8-dioxa-4,11-diazacyclotetradeca-5,12-diene-6,13-dicarboxylate	C20 H30 N2 O8	426.2	3.09461	Mango
SDW01967	1H-Inden-1-ylidene	C9 H6	114.047	1.69659	Mango
SDW01968	Unknown	C6 H2 N O5 P3 S5	420.775	11.812	Mango
SDW01969	1-Aminocyclohexanecarboxylic Acid	C7 H13 N O2	143.094	1.15942	Mango
SDW01970	methyl 4-oxo-4H-benzo[4,5]imidazo[2,1-b][1,3]thiazine-2-carboxylate	C12 H8 N2 O3 S	260.02	0.182655	Mango
SDW01971	1,1,2-Trimethyldisilene	C3 H10 Si2	102.047	1.21277	Mango
SDW01972	1,2-Cyclohexanediol	C6 H12 O2	116.084	7.05462	Mango
SDW01974	Unknown	C2 H5 Cl2 N O2	144.97	16.6386	Mango
SDW01975	Unknown	C3 H2 O3 S	117.972	4.75525	Mango
SDW01976	Unknown	C5 H14 N2 O P2	180.058	17.2605	Mango
SDW01977	Ethylenediamine-N,N'-diacetic-N,N'-dipropionic acid	C12 H20 N2 O8	320.121	0.830549	Mango
SDW01978	Unknown	unknown	104.103	10.8772	Mango
SDW01979	Unknown	unknown	94.0242	1.04849	Mango
SDW01980	5-Hydroxy-3-methyl-2-phenyl-1,3-thiazol-3-ium	C10 H10 N O S	192.048	4.73965	Mango
SDW01981	Unknown	C6 H12 F N3 O3	193.086	7.57374	Mango
SDW01982	Unknown	C10 H12 F3 N4 P S5	435.936	16.6859	Mango
SDW01983	Unknown	unknown	68.027	4.94809	Mango
SDW01984	bis-beta-D-fructofuranose 1,2':2,3'-dianhydride	C12 H20 O10	324.105	1.4166	Mango
SDW01985	Unknown	C23 H36 F2	350.279	12.5495	Mango
SDW01986	Unknown	C34 H69 F2 N6 O3 P S	710.485	12.8132	Mango
SDW01987	Hypoglycin A	C7 H11 N O2	141.079	0.899793	Mango
SDW01988	Unknown	C8 H10 N2 O2 P2	228.021	0.177909	Mango
SDW01989	Diethyl fumarate	C8 H12 O4	172.977	1.09127	Mango
SDW01990	Unknown	C4 H9 N5 O2 S	191.048	0.927609	Mango
SDW01991	Aminocyclopyrachlor	C8 H8 Cl N3 O2	213.031	16.9021	Mango
SDW01992	Unknown	C17 H30 F N2 O4 P	376.192	11.423	Mango
SDW01994	7-Methoxy-4H-chromen-4-one	C10 H8 O3	176.047	4.13588	Mango
SDW01995	Unknown	C5 H10 O P2	148.021	1.36112	Mango
SDW01996	Unknown	unknown	89.9409	1.64796	Mango
SDW01997	(4-nitrophenyl){4-[3-(trifluoromethyl)pyridin-2-yl]piperazino}methanone	C17 H15 F3 N4 O3	358.126	4.26769	Mango
SDW01998	Unknown	C4 H7 N2 O5 P	194.01	0.628879	Mango
SDW01999	Unknown	C17 H17 F O9	384.084	0.799224	Mango
SDW02001	Unknown	C4 H4 F3 N O2 S	186.991	12.4384	Mango
SDW02002	1-(2,6-Dimethylphenyl)-1,2-hydrazinedicarboximidamide	C10 H16 N6	221.105	0.210208	Mango
SDW02003	glycidyl oleate	C21 H38 O3	338.282	14.4091	Mango
SDW02004	EPTC	C9 H19 N O S	189.119	0.803905	Mango
SDW02005	Unknown	C21 H39 F N2 O8	466.269	12.1497	Mango
SDW02006	Unknown	C25 H45 F3 O	418.344	12.6905	Mango
SDW02007	Unknown	C5 H6 F2 N6 O2	220.052	2.25848	Mango
SDW02009	Unknown	C12 H6 O	166.042	0.175262	Mango
SDW02011	Unknown	C4 H N O4 S	158.963	17.2181	Mango
SDW02012	(5R)-3-[(1R)-1-Hydroxyoctyl]-5-methyl-2(5H)-furanone	C13 H22 O3	226.084	4.53393	Mango
SDW02013	(2S,4R,5S,6S,7R)-5,6,12,14-tetrahydroxy-4-(hydroxymethyl)-13-methoxy-3,8-dioxatricyclo[8.4.0.0Â?,â·]tetradeca-1(14),10,12-trien-9-one	C14 H16 O9	350.061	0.803143	Mango
SDW02014	Unknown	C6 H15 F2 N2 O5 P S	296.042	16.7513	Mango
SDW02015	Unknown	C3 H8 F N3 O3	153.055	7.57291	Mango
SDW02016	Unknown	C37 H66 N7 O6 P	735.481	13.7043	Mango
SDW02017	Unknown	C27 H49 F N2 O S	468.357	13.2161	Mango
SDW02018	Unknown	unknown	437.714	16.7022	Mango
SDW02019	Unknown	C16 H22 F N O3 S	327.131	2.12692	Mango
SDW02020	12a-Hydroxypachyrrhizone	C20 H14 O8	382.07	0.982568	Mango
SDW02021	γ-Linolenic acid ethyl ester	C20 H34 O2	312.266	14.7901	Mango
SDW02022	Unknown	C9 H21 N5 O5	279.155	9.77406	Mango
SDW02023	Unknown	C29 H67 N10 O2 P	618.519	16.5425	Mango
SDW02024	Unknown	C24 H47 N O8	477.33	9.178	Mango
SDW02025	1-(2-Chlorethyl)imidazolidin-2-on	C5 H9 Cl N2 O	148.04	4.74112	Mango
SDW02026	Unknown	C10 H2 O	138.011	0.27746	Mango
SDW02027	Unknown	C9 H10 F5 N2 O P3	349.994	11.9127	Mango
SDW02028	Unknown	C2 H F2 N5 O3	181.005	16.911	Mango
SDW02029	Unknown	C4 H7 F3 O2 P2	205.987	0.519652	Mango
SDW02030	Unknown	C2 H3 Cl2 F N4	171.971	17.1529	Mango
SDW02032	Unknown	C26 H49 F O4	444.36	12.9317	Mango
SDW02034	monobehenin	C25 H50 O4	414.37	13.2316	Mango
SDW02036	1,1-Difluoro-cyclopropabenzene	C7 H4 F2	126.028	16.9042	Mango
SDW02037	THREO-SPHINGOSINE, (-)-	C18 H37 N O2	299.282	9.96809	Mango
SDW02038	Unknown	C30 H61 N7 O	535.496	13.6624	Mango
SDW02039	Unknown	C7 H14 F2 O2 S	200.068	0.968485	Mango
SDW02040	Unknown	C18 H39 N O4	333.287	8.67094	Mango
SDW02041	Unknown	C3 H6 F N4 O2 P S	211.993	0.325202	Mango
SDW02042	3'-Methoxypongapin	C20 H14 O7	366.074	4.94306	Mango
SDW02043	Unknown	C16 H31 N7	321.264	9.72449	Mango
SDW02044	Unknown	C3 H7 N3 S2	149.008	16.6532	Mango
SDW02045	Unknown	C5 H10 F2 S	140.047	2.07475	Mango
SDW02046	Diethyl acetamidomalonate	C9 H15 N O5	217.095	0.831997	Mango
SDW02047	Unknown	C16 H26 F3 N3 O4 P2	443.136	4.04273	Mango
SDW02048	NP-011548	C18 H34 O3	280.24	10.5017	Mango
SDW02049	7-Methoxy-4H-chromen-4-one	C10 H8 O3	176.047	6.49875	Mango
SDW02050	(2E)-3-(4-{[(2S,3R,4S,5S,6R)-3,4,5-trihydroxy-6-(hydroxymethyl)oxan-2-yl]oxy}phenyl)prop-2-enoic acid	C15 H18 O8	348.082	4.17225	Mango
SDW02051	Di-Î±-linolenin	C39 H64 O5	612.474	12.6936	Mango
SDW02052	(4alpha,5alpha,12R)-3-Hydroxy-12,13-epoxytrichothecane-4,15-diyl diacetate	C19 H28 O7	368.11	4.04371	Mango
SDW02053	Unknown	C6 H15 N P2 S	195.041	0.727643	Mango
SDW02054	L(+)-Ornithine	C5 H12 N2 O2	132.09	0.665148	Mango
SDW02055	Unknown	unknown	101.941	17.2559	Mango
SDW02056	OB4520000	C10 H9 N O	159.068	4.7567	Mango
SDW02057	1,4,7-Heptanetriamine	C7 H19 N3	145.158	4.69867	Mango
SDW02058	Unknown	unknown	104.103	11.8133	Mango
SDW02059	Unknown	C4 H9 N5 O2 S	191.048	1.02711	Mango
SDW02060	Unknown	C4 H13 N5 O3 S5	338.963	16.4651	Mango
SDW02061	Unknown	C5 H7 F4 N O S	205.019	1.38094	Mango
SDW02062	Bartericin C	C25 H28 O5	408.196	11.3753	Mango
SDW02063	Unknown	C8 H14 F N2 O11 P3	425.98	9.1515	Mango
SDW02064	9-Aminononanoic acid	C9 H19 N O2	173.141	1.46117	Mango
SDW02065	trimethadione	C6 H9 N O3	143.058	16.8795	Mango
SDW02066	Unknown	C3 H4 F2 N4 S	166.013	16.4925	Mango
SDW02067	Unknown	C3 H9 F2 N2 O3 P	190.031	0.949323	Mango
SDW02069	Unknown	C27 H66 F N10 P S2	644.462	12.7183	Mango
SDW02070	Unknown	C5 H3 F N4 O S	186.001	0.139201	Mango
SDW02071	Unknown	C3 H Cl2 F N4	181.956	0.651086	Mango
SDW02072	Unknown	C36 H66 N2 O9	670.478	12.6196	Mango
SDW02074	(-)-Cholesteryl acetate	C29 H48 O2	428.365	12.9261	Mango
SDW02075	Unknown	C10 H8 F2 N6 O5	330.052	17.0572	Mango
SDW02076	Unknown	C H3 N2 O2 P	105.993	0.83907	Mango
SDW02077	1-Methylguanine	C6 H7 N5 O	165.065	1.55852	Mango
SDW02078	Unknown	C H F N4 O4	151.998	16.6923	Mango
SDW02080	1,1-Difluoro-cyclopropabenzene	C7 H4 F2	126.027	17.2203	Mango
SDW02081	Unknown	C7 H4 F3 N6 O4 P S	355.97	16.797	Mango
SDW02084	Unknown	C4 H10 P2 S	151.998	17.0407	Mango
SDW02086	Unknown	C24 H38 F5 N3 O6 P2	621.216	1.70737	Mango
SDW02087	Unknown	C28 H62 F N9 O2	575.499	15.3283	Mango
SDW02088	3,4,5-Trimethoxy-N-[2-(3-methoxyphenoxy)ethyl]benzamide	C19 H23 N O6	361.152	4.63801	Mango
SDW02089	Unknown	C13 H29 F2 N9	349.25	11.4728	Mango
SDW02090	Unknown	C24 H58 N9 O6 P	599.424	13.3512	Mango
SDW02091	1,2-Cyclohexanediol	C6 H12 O2	116.084	7.26425	Mango
SDW02092	Unknown	C13 H17 F2 N2 O8 P S	430.042	2.62457	Mango
SDW02094	Unknown	C14 H5 F4 N2 O4 P S2	435.936	16.8452	Mango
SDW02095	Unknown	C30 H51 F5 N4 O2 P2	656.341	3.43008	Mango
SDW02096	Thymine	C5 H6 N2 O2	126.043	2.33704	Mango
SDW02097	Glimepiride	C24 H34 N4 O5 S	490.225	12.1796	Mango
SDW02098	bacteriohopanetetrol	C35 H62 O4	546.465	15.0664	Mango
SDW02099	(all-E)-Phytoene	C40 H64	544.5	15.8622	Mango
SDW02100	Unknown	C9 H27 F N8 O3	314.219	14.7951	Mango
SDW02102	Unknown	C11 H27 F N6	262.229	11.5329	Mango
SDW02103	Unknown	unknown	86.9535	17.1544	Mango
SDW02104	Unknown	C20 H43 N7 O6	477.33	9.03732	Mango
SDW02105	Unknown	C18 H37 F3 N2 O6	434.261	11.3828	Mango
SDW02106	Unknown	C20 H34 F3 N	345.264	16.5806	Mango
SDW02107	Unknown	C14 H28 F2 N10 O2	406.236	13.337	Mango
SDW02108	Unknown	C5 H8 F N4 O P S	222.014	1.095	Mango
SDW02109	Unknown	C3 H F2 N S	120.98	16.748	Mango
SDW02110	Unknown	C15 H25 N O7 S	363.134	4.28752	Mango
SDW02111	Unknown	C7 H11 N2 O5 P	234.041	2.26036	Mango
SDW02112	Unknown	C6 H6 F2 O10	275.993	17.1059	Mango
SDW02114	L-Histidine	C6 H9 N3 O2	155.069	16.8978	Mango
SDW02116	Unknown	unknown	54.0114	1.25153	Mango
SDW02117	Unknown	C32 H69 N6 O8 P	696.491	15.3497	Mango
SDW02118	(2R,3S,4S,5R,6S)-2-(hydroxymethyl)-6-{4-[(1E)-3-hydroxyprop-1-en-1-yl]-2,6-dimethoxyphenoxy}oxane-3,4,5-triol	C17 H24 O9	372.141	4.31265	Mango
SDW02119	Unknown	C6 H16 N9 O P	261.121	0.88761	Mango
SDW02120	Unknown	C9 H15 F N4 O3 S2	310.057	16.729	Mango
SDW02121	Loprazolam	C23 H21 Cl N6 O3	442.147	6.85355	Mango
SDW02122	2-Methoxyresorcinol	C7 H8 O3	140.047	6.14729	Mango
SDW02123	Unknown	C24 H53 F N9 O3 P3	627.348	11.8187	Mango
SDW02124	Unknown	C2 H4 N3 O P S2	180.954	0.733325	Mango
SDW02125	Unknown	C21 H44 F N4 P3	464.274	11.0636	Mango
SDW02126	N-Acetyl-L-leucine	C8 H15 N O3	173.069	0.886889	Mango
SDW02127	Unknown	C17 H27 F4 N7 O2 P2	499.162	4.73763	Mango
SDW02128	Unknown	C26 H43 F3 O2	444.323	11.8027	Mango
SDW02129	Unknown	C7 H5 N7	187.061	1.83256	Mango
SDW02130	Pyridoxamine	C8 H12 N2 O2	168.09	0.837006	Mango
SDW02131	Unknown	C10 H F5 N2 O7	355.97	16.4301	Mango
SDW02133	Unknown	C11 H8 N6 O11 S	431.997	11.6378	Mango
SDW02134	Unknown	C4 H10 F3 N3 O S3	268.994	12.4224	Mango
SDW02135	Stearyldiethanolamine	C22 H47 N O2	357.36	10.4244	Mango
SDW02136	Unknown	C10 H2 O	138.011	0.380611	Mango
SDW02137	Unknown	C31 H34 N4 O7 P2	636.19	6.17881	Mango
SDW02138	Triphenylphosphine oxide	C18 H15 O P	278.086	8.3095	Mango
SDW02139	Unknown	unknown	116.067	0.980656	Mango
SDW02140	Unknown	C3 H5 Cl N2 O4 S	199.966	0.569923	Mango
SDW02141	(4-Oxocyclohexyl)acetic acid	C8 H12 O3	157.005	0.976536	Mango
SDW02142	Unknown	C19 H33 F5 N6 O2	472.258	11.213	Mango
SDW02143	Unknown	C4 H8 F N4 O2 P S	226.009	17.1697	Mango
SDW02144	Unknown	C5 H6 F3 N3	165.051	1.12654	Mango
SDW02145	Unknown	C7 H6 F N4 O4 P S	291.984	16.5201	Mango
SDW02146	1-(9Z-hexadecenoyl)-2-(9Z,12Z-octadecadienoyl)-sn-glycerol	C37 H66 O5	590.49	13.5017	Mango
SDW02147	Unknown	C22 H41 F O4	388.297	11.8058	Mango
SDW02148	6-Hydroxy-1-(hydroxymethyl)-5-{2-[(4-methoxybenzyl)amino]-2-oxoethyl}-1,4a-dimethyldecahydro-2-naphthalenyl propylcarbamate	C27 H42 N2 O6	512.296	10.6403	Mango
SDW02149	Unknown	C4 H10 N2 P2 S	180.003	1.08137	Mango
SDW02150	N,N-Dimethylaniline	C8 H11 N	121.089	3.00787	Mango
SDW02151	Unknown	C10 H15 F3 O2 P2 S2	349.993	9.17354	Mango
SDW02152	DG(16:1(9Z)/18:3(9Z,12Z,15Z)/0:0)	C37 H64 O5	588.475	13.1278	Mango
SDW02153	Unknown	C32 H57 F3 O4	562.423	12.9234	Mango
SDW02154	Unknown	unknown	88.053	0.106427	Mango
SDW02155	Unknown	C3 H4 F2 O8	205.988	9.3577	Mango
SDW02156	Unknown	unknown	278.639	10.6258	Mango
SDW02157	Unknown	unknown	512.804	11.2736	Mango
SDW02158	Unknown	C13 H26 Cl2 N6	336.159	11.5283	Mango
SDW02159	ETFAA	C6 H7 F3 O3	184.035	1.70832	Mango
SDW02160	NP-016928	C20 H28 O3	298.188	11.5394	Mango
SDW02161	Unknown	C6 H9 F N4 O S2	236.02	17.0155	Mango
SDW02162	Unknown	C3 H2 O3 S	117.972	0.0718101	Mango
SDW02163	Unknown	C19 H27 F6 N3 O4 S2	539.135	1.20996	Mango
SDW02164	Unknown	unknown	78.0146	0.262638	Mango
SDW02165	Dimethyl 5-(2-quinolinyl)-1,2,4-triazine-3,6-dicarboxylate	C16 H12 N4 O4	324.131	5.11974	Mango
SDW02167	Unknown	C17 H45 N10 O P	436.352	13.2148	Mango
SDW02168	Unknown	C5 H7 N3 O3 P2	218.996	0.549211	Mango
SDW02169	NP-022531	C20 H34 O3	322.248	11.9079	Mango
SDW02170	2-(carboxymethoxy)-4-methoxybenzoic acid	C10 H10 O6	264	17.1746	Mango
SDW02171	Unknown	C22 H37 N2 O6 P S	488.21	11.8513	Mango
SDW02172	5055305	C12 H21 N O6	275.136	1.24004	Mango
SDW02173	Unknown	unknown	59.0491	0.677846	Mango
SDW02175	Thiram	C6 H12 N2 S4	202.032	0.242483	Mango
SDW02176	Unknown	C21 H23 N5 O5 S	457.143	0.71846	Mango
SDW02177	Unknown	C5 H10 N8 O4 S	278.055	5.06583	Mango
SDW02178	Unknown	unknown	76.9622	15.6818	Mango
SDW02179	Asulam	C8 H10 N2 O4 S	230.036	17.0361	Mango
SDW02180	Unknown	C22 H45 F3 N O5 P	491.301	10.053	Mango
SDW02181	S-beta-D-glucosyl-L-cysteine	C9 H17 N O7 S	283.072	0.817271	Mango
SDW02182	Unknown	C6 H F	92.0059	0.0975103	Mango
SDW02183	Ferulic acid	C10 H10 O4	194.058	4.14194	Mango
SDW02184	NP-014287	C18 H32 O3	296.235	10.3704	Mango
SDW02185	Unknown	C10 H9 N4 O3 P	264.042	0.172508	Mango
SDW02186	Unknown	C6 H8 N4 O4 S	232.026	16.7979	Mango
SDW02187	Unknown	C3 H2 O2 S	101.977	17.2421	Mango
SDW02189	Guanine	C5 H5 N5 O	151.049	2.13321	Mango
SDW02190	(4aR,5R,6S)-5-ethenyl-4a-hydroxy-6-{[(2S,3R,4S,5S,6R)-3,4,5-trihydroxy-6-(hydroxymethyl)oxan-2-yl]oxy}-1H,3H,4H,4aH,5H,6H-pyrano[3,4-c]pyran-1-one	C16 H22 O10	356.11	5.02167	Mango
SDW02191	[5-(Methoxycarbonyl)-2-furyl]methyl 4-acetyl-3,5-dimethyl-1H-pyrrole-2-carboxylate	C16 H17 N O6	319.105	5.16661	Mango
SDW02192	Aceanthrenequinone	C16 H8 O2	232.052	2.9198	Mango
SDW02193	Unknown	C41 H65 N3 O7	711.483	13.3631	Mango
SDW02194	Unknown	C4 H2 F2 N O3 P	180.974	16.3867	Mango
SDW02195	Unknown	C22 H32 N10	436.28	11.1198	Mango
SDW02196	L-Isoleucine	C6 H13 N O2	131.095	5.07966	Mango
SDW02197	8-chloro-6-(trifluoromethyl)imidazo[1,2-a]pyridine-2-carbohydrazide	C9 H6 Cl F3 N4 O	278.016	17.0701	Mango
SDW02198	Unknown	unknown	85.0897	11.2042	Mango
SDW02199	Unknown	C12 H22 N4 O6	318.153	0.931365	Mango
SDW02200	γ-Linolenic acid ethyl ester	C20 H34 O2	312.266	13.8399	Mango
SDW02202	Unknown	C29 H46 F2 N6 O3 P2 S	658.279	11.3447	Mango
SDW02203	Unknown	C28 H57 F5 N6 O2	604.444	11.7853	Mango
SDW02204	Unknown	C31 H55 F2 N4 O2 P	584.405	12.7879	Mango
SDW02205	(4-nitrophenyl){4-[3-(trifluoromethyl)pyridin-2-yl]piperazino}methanone	C17 H15 F3 N4 O3	380.108	4.25263	Mango
SDW02206	Unknown	C40 H74 F2 N3 O3 P	713.544	12.8226	Mango
SDW02207	Unknown	C6 H16 F N2 O4 P	230.083	16.8917	Mango
SDW02208	Anisole	C7 H8 O	108.021	0.210812	Mango
SDW02209	(6-{[3,4-dihydroxy-2,5-bis(hydroxymethyl)oxolan-2-yl]oxy}-3,4,5-trihydroxyoxan-2-yl)methyl (2E)-3-(4-hydroxy-3-methoxyphenyl)prop-2-enoate	C22 H30 O14	540.145	5.02636	Mango
SDW02210	Unknown	C18 H29 N2 O2 P	336.197	11.7778	Mango
SDW02211	Unknown	C21 H40 F N9 O5	517.315	10.5577	Mango
SDW02212	Unknown	C15 H33 N9 O	355.28	11.387	Mango
SDW02213	Unknown	C3 H3 N5 O4 S	204.991	0.638553	Mango
SDW02214	Unknown	C19 H34 F3 P S	382.207	11.864	Mango
SDW02215	Unknown	C6 H13 N4 O5 P	252.063	0.81493	Mango
SDW02216	Butylone	C12 H15 N O3	221.105	2.77337	Mango
SDW02217	Unknown	C2 H3 N5 O3 S	176.996	16.731	Mango
SDW02218	Unknown	C38 H67 F S	574.495	12.4446	Mango
SDW02219	Unknown	C5 H5 N3 O2 P2	200.985	4.69137	Mango
SDW02220	4-Methoxybenzaldehyde	C8 H8 O2	136.052	3.18671	Mango
SDW02222	Unknown	C10 H13 F2 N2 O P	246.074	0.795615	Mango
SDW02223	Unknown	C45 H67 F O	642.519	11.7675	Mango
SDW02224	Unknown	C6 H17 F3 N4 O18 P2 S	583.969	16.5046	Mango
SDW02226	Unknown	unknown	80.0269	0.187148	Mango
SDW02228	Unknown	unknown	123.04	0.961121	Mango
SDW02229	2,3,4,6-Tetra-O-acetyl-N-(1-piperidinylcarbonothioyl)hexopyranosylamine	C20 H30 N2 O9 S	474.169	0.813755	Mango
SDW02230	Unknown	C22 H35 F N4 O5	454.26	11.8011	Mango
SDW02231	Unknown	C9 H11 F2 N2 P	216.063	0.887671	Mango
SDW02232	e-Tokoferol	C28 H42 O2	410.318	12.5435	Mango
SDW02233	Unknown	C31 H67 N4 O3 P	574.496	12.1152	Mango
SDW02234	Flusulfamide	C13 H7 Cl2 F3 N2 O4 S	413.946	16.5082	Mango
SDW02236	(3R,4R)-4-[(3,4-dimethoxyphenyl)methyl]-3-[(4-hydroxy-3-methoxyphenyl)methyl]oxolan-2-one	C21 H24 O6	388.136	4.52599	Mango
SDW02237	Unknown	C3 H8 F N O3 S2	188.993	1.22309	Mango
SDW02238	Unknown	C11 H22 F4 N4 O3	334.163	5.26406	Mango
SDW02239	Unknown	C35 H68 N2 O7	628.504	15.9271	Mango
SDW02240	Galactosamine	C6 H13 N O5	179.079	0.901694	Mango
SDW02242	Unknown	C5 H5 F2 N2 O P S	209.983	16.8087	Mango
SDW02244	Unknown	C11 H11 N4 O P	246.068	2.48824	Mango
SDW02245	Unknown	C23 H32 N10 O	464.274	10.8477	Mango
SDW02246	Unknown	C12 H7 Cl N4 O	258.031	1.28241	Mango
SDW02247	Unknown	C2 H2 O4 S	121.968	17.1346	Mango
SDW02248	N-arachidonoylsphinganine	C38 H69 N O3	587.527	14.898	Mango
SDW02249	L-Histidine	C6 H9 N3 O2	155.069	17.1297	Mango
[truncated: 48,385 more rows]

## Sheet: Table S2
Table S2. Metabolites variation in the three fruits and three crops
ID	Name	Chemical Formula	Q1	Q3	RT [min]	Wheat	Rice	Corn	Mango	Grape	banana
SDW00003	2-Amino-1,3,4-octadecanetriol	C18 H39 N O3	318.3	60.0452	9.67174	23.7545	26.0473	22.8178	25.2517	23.8461	27.0863
SDW00004	L-Norleucine	C6 H13 N O2	132.102	86.097	0.91929	26.9964	25.5221	29.9042	26.4892	29.1458	30.4116
SDW00006	2-Mercaptoethanol	C2 H6 O S	79.0218	63.9985	0.841864	27.2035	27.4615	25.6743	26.0144	26.081	24.9645
SDW00007	Betaine	C5 H11 N O2	118.086	58.0659	0.750896	30.6261	26.6591	25.1975	22.9131	24.0111	20.9464
SDW00008	Valine	C5 H11 N O2	118.086	72.0815	0.797608	25.0689	24.1927	27.3582	25.2231	25.7039	26.5616
SDW00009	6-Methoxyquinoline	C10 H9 N O	160.076	132.081	1.61777	19.0226	20.3854	16.7521	ND	14.1566	28.2333
SDW00011	DL-Arginine	C6 H14 N4 O2	175.119	70.0658	0.734501	24.554	24.2204	25.1163	30.1779	30.6699	27.7864
SDW00013	Unknown	unknown	86.097	69.0706	0.909133	22.4098	20.8789	24.8079	22.4585	23.8112	24.0436
SDW00015	D-(+)-Tryptophan	C11 H12 N2 O2	205.097	188.07	2.50414	30.1757	25.7623	28.5415	26.9995	25.7507	29.3321
SDW00016	trans-3-Indoleacrylic acid	C11 H9 N O2	188.07	146.06	2.50352	27.5288	23.1816	25.6478	24.1102	23.023	26.458
SDW00017	2-Amino-1,3,4-octadecanetriol	C18 H39 N O3	318.3	60.0452	9.67189	23.7548	26.0652	22.8175	25.2164	23.8443	27.0523
SDW00018	L-Phenylalanine	C9 H11 N O2	166.086	120.081	1.72685	25.8023	24.6215	29.1805	26.7805	28.5374	27.9732
SDW00021	N-Benzyl-3-(triisopropylsilyl)-N-[3-(triisopropylsilyl)-2-propyn-1-yl]-2-propyn-1-amine	C31 H53 N Si2	496.339	104.107	10.9446	27.7108	28.5341	27.7226	22.5491	22.0954	25.1972
SDW00024	Choline	C5 H13 N O	104.107	60.0816	0.705383	25.6851	26.4351	26.764	23.33	24.3649	24.354
SDW00027	Allopurinol	C5 H4 N4 O	137.06	91.0548	0.883367	18.6845	18.3844	22.3495	17.9964	19.8972	28.6358
SDW00030	Choline	C5 H13 N O	104.107	60.0815	0.705383	25.7139	26.4351	26.7756	23.3124	24.3528	24.3417
SDW00034	L-Tyrosine	C9 H11 N O3	182.081	136.076	0.89176	21.2011	20.8996	24.5212	20.2564	22.1283	23.0082
SDW00035	N-Benzylmethanimine	C8 H9 N	120.081	103.055	1.72676	25.6336	24.4499	28.9874	26.7359	28.3744	27.7794
SDW00041	AB-005	C23 H32 N2 O	353.266	311.189	11.2165	16.7875	18.1652	18.2182	17.8747	16.6042	18.9398
SDW00043	2,3-Difluoro-4-methoxyphenol	C7 H6 F2 O2	161.029	119.019	0.596973	21.4834	19.7585	21.5153	22.1271	21.7158	22.1771
SDW00046	Unknown	unknown	133.035	119.019	0.601773	17.9783	15.7026	18.6124	18.9638	18.7426	18.7618
SDW00048	2,3-Difluoro-4-methoxyphenol	C7 H6 F2 O2	161.029	119.019	0.593357	21.2761	19.5453	21.8174	22.3989	21.8665	22.0158
SDW00049	L-Tyrosine	C9 H11 N O3	182.081	136.076	1.05787	24.6133	23.8044	28.6968	24.2364	25.4477	27.3349
SDW00053	Valine	C5 H11 N O2	118.086	72.0815	0.793295	25.0169	24.0953	27.3641	25.2133	25.7216	26.5685
SDW00054	Furfuranol	C5 H6 O2	99.0445	56.9656	0.595135	24.0508	23.346	22.4402	24.6387	24.8018	22.9632
SDW00055	D-(+)-Proline	C5 H9 N O2	116.071	70.0658	0.761429	23.94	24.3621	28.1803	25.9154	27.2277	25.1613
SDW00059	N1-(3-chlorophenyl)-2-[2-(trifluoromethyl)-4-quinolyl]hydrazine-1-carboxamide	C17 H12 Cl F3 N4 O	381.078	219.027	0.733171	19.6923	21.9413	25.1265	26.2867	24.4935	26.7989
SDW00061	DL-Glutamine	C5 H10 N2 O3	147.076	84.045	0.778675	22.8118	20.8746	24.9207	25.9465	24.7847	26.4953
SDW00062	N-Methyl-2-pyrrolidone	C5 H9 N O	100.076	58.0295	1.96739	19.4383	22.5629	22.6888	18.0851	18.1689	23.0144
SDW00063	Unknown	C14 H33 F N6 O3	353.265	291.231	11.1665	18.9875	18.3312	17.706	18.6234	17.4225	18.3805
SDW00067	L-Histidine	C6 H9 N3 O2	156.077	110.072	0.691195	23.7053	23.4765	25.326	22.3993	24.5411	26.6562
SDW00069	Unknown	unknown	175.045	119.019	0.587449	21.8004	19.5301	22.6291	22.9781	22.7271	22.8286
SDW00071	[Similar to: 2-{2-[(2Z)-pent-2-en-1-yl]-3-{[3,4,5-trihydroxy-6-(hydroxymethyl)oxan-2-yl]oxy}cyclopentyl}acetic acid; ΔMass: -256.1822 Da]	unknown	119.019	101.009	0.579026	23.2998	20.9415	23.861	24.5807	23.8693	24.3085
SDW00072	Unknown	unknown	85.029	57.0343	0.801657	21.0366	21.0512	20.679	22.6343	23.3297	21.023
SDW00076	Picolinic acid N-oxide	C6 H5 N O3	139.05	98.9758	0.589005	16.1719	14.8871	13.3712	17.3686	17.3878	15.6557
SDW00078	2-Mercaptoethanol	C2 H6 O S	79.0219	63.9985	0.836198	27.2138	27.4634	25.6832	26.0297	26.0883	24.902
SDW00084	L-Glutathione (reduced)	C10 H17 N3 O6 S	308.09	76.0222	0.830538	23.6027	22.8216	26.7004	28.2797	27.5091	15.8547
SDW00085	L-Glutathione (reduced)	C10 H17 N3 O6 S	308.09	76.0222	0.834145	23.7286	22.8793	26.6837	28.2788	27.58	16.2963
SDW00086	N-Benzyl-3-(triisopropylsilyl)-N-[3-(triisopropylsilyl)-2-propyn-1-yl]-2-propyn-1-amine	C31 H53 N Si2	496.339	104.107	10.9424	27.6678	28.487	27.7066	22.3844	21.9405	25.1475
SDW00092	Glycerophospho-N-palmitoyl ethanolamine	C21 H44 N O7 P	454.292	313.273	10.954	23.502	25.7777	25.3323	23.0649	21.3501	24.5764
SDW00094	L-Histidine	C6 H9 N3 O2	156.077	110.072	0.692478	23.2302	22.9575	25.1623	23.5677	26.0824	27.8275
SDW00095	Unknown	C21 H39 F3 O2	381.297	339.22	11.6507	21.1048	22.2738	22.1109	18.297	17.2842	19.6645
SDW00096	D-(+)-Pipecolinic acid	C6 H11 N O2	130.086	84.0813	0.81146	23.5923	22.9218	25.8092	25.3802	26.2608	27.6127
SDW00097	7-(Î²-D-Glucopyranosyloxy)-2,3-dihydro-2-oxo-1H-indole-3-acetic acid	C16 H19 N O9	370.113	162.055	3.12011	ND	14.362	29.7324	ND	14.7797	16.818
SDW00107	Trigonelline	C7 H7 N O2	138.055	94.0656	0.749345	23.5812	25.6123	25.7331	25.1283	27.1973	25.9065
SDW00109	Furfural	C5 H4 O2	97.0289	69.0342	0.775722	22.1555	22.2239	21.8183	23.6771	24.2645	22.3361
SDW00110	Unknown	unknown	85.029	57.0343	0.796271	20.9994	21.13	20.732	22.5341	23.3388	21.0778
SDW00111	Unknown	C13 H20 N2 O7 S2	381.079	219.026	0.735941	19.5486	21.9539	25.0829	26.2554	24.5616	26.8239
SDW00112	2-Arachidonoyl glycerol	C23 H38 O4	379.281	337.204	11.377	22.4112	22.4239	22.3135	16.4231	17.3615	20.1708
SDW00113	2-Arachidonoyl glycerol	C23 H38 O4	379.281	337.204	11.3828	22.3877	22.4142	22.3215	16.3983	17.4047	20.1163
SDW00116	Unknown	unknown	115.024	101.009	0.589613	24.632	22.0471	25.6327	25.9895	25.7882	26.0769
SDW00118	Unknown	C25 H46 F N3 O7	520.339	104.107	10.7394	27.8931	28.2413	27.3084	18.5622	21.5288	22.5717
SDW00120	Unknown	C10 H22 N2 O4	235.165	118.086	0.769515	28.047	21.0055	17.171	ND	14.185	ND
SDW00122	N-Benzyl-3-(triisopropylsilyl)-N-[3-(triisopropylsilyl)-2-propyn-1-yl]-2-propyn-1-amine	C31 H53 N Si2	496.339	104.107	10.9419	27.6768	28.5438	27.677	22.463	22.0313	25.2097
SDW00125	2-Arachidonoyl glycerol	C23 H38 O4	379.281	337.204	11.3784	22.0627	22.1547	21.9127	16.2376	17.1595	19.8395
SDW00129	Vorinostat	C14 H20 N2 O3	265.154	177.054	3.51801	16.3614	18.5847	27.2609	ND	14.9523	19.8613
SDW00134	1-Linoleoyl-2-Hydroxy-sn-glycero-3-PC	C26 H50 N O7 P	520.339	184.073	10.738	29.1942	29.536	28.8375	20.6984	23.4988	25.0875
SDW00138	Unknown	C18 H33 F5 N O3 P3	500.169	161.06	4.97355	ND	16.4991	21.0095	17.1274	15.1324	27.7151
SDW00147	1-Oxo-2,3-dihydro-1H-phospholium	C4 H6 O P	101.009	82.9983	0.589941	25.478	23.0372	26.3928	26.817	26.4162	26.7007
SDW00148	D-(+)-Pyroglutamic Acid	C5 H7 N O3	130.05	84.045	0.810377	23.6222	22.909	25.7099	25.4043	26.224	27.542
SDW00151	Furfural	C5 H4 O2	97.0289	69.0342	0.776225	22.1565	22.1608	21.8593	23.7106	24.0775	22.4353
SDW00153	Unknown	C21 H42 F N3 O7	468.308	104.107	10.3551	21.7471	27.0208	19.0705	17.7965	16.4296	18.654
SDW00157	3134	C7 H11 N S	143.019	119.019	0.589276	24.0581	21.7365	24.8601	25.2331	24.9528	25.2207
SDW00158	2-Mercaptoethanol	C2 H6 O S	79.0218	63.9985	0.833741	27.2139	27.4627	25.6634	26.0174	26.0806	24.9006
SDW00161	5-Hydroxymethyl-2-furaldehyde	C6 H6 O3	127.039	109.029	0.772741	22.5373	22.3709	22.2227	21.3807	22.4456	20.7888
SDW00164	Palmitic Acid	C16 H32 O2	274.273	88.0762	8.43801	27.4976	27.2107	26.5633	27.4888	27.6644	27.2551
SDW00169	Adenosine	C10 H13 N5 O4	268.103	136.062	2.08906	29.6816	28.5011	29.5136	24.5375	22.6112	25.545
SDW00172	2,3-Dihydroxypropyl stearate	C21 H42 O4	381.297	339.22	11.6406	21.2544	22.4715	22.2345	18.2616	17.2192	19.8003
SDW00174	Unknown	unknown	147.05	119.019	0.883693	21.9421	22.9903	25.4139	21.0362	22.7055	23.9234
SDW00176	Bisazir	C5 H12 N3 P S	179.04	119.019	0.607001	19.0591	19.0255	19.2462	19.2081	18.8113	19.0309
SDW00182	Unknown	C26 H41 N2 O5 P	493.28	119.049	4.36352	ND	ND	25.9608	15.9364	ND	ND
SDW00184	Unknown	C19 H31 N5 O9	474.217	86.097	0.923853	19.737	19.1441	24.2739	22.5052	22.8618	26.2799
SDW00188	Unknown	unknown	116.986	98.9758	0.586748	22.3644	21.6217	20.4443	23.4159	23.6829	21.9203
SDW00190	DL-Glutamine	C5 H10 N2 O3	147.076	84.045	0.773346	23.0719	21.4463	25.4146	26.2537	24.9957	26.4297
SDW00192	Glycerophosphocholine	C8 H20 N O6 P	258.11	104.107	0.772269	24.55	27.2292	21.564	20.1657	20.6873	21.6234
SDW00193	Argininosuccinic acid	C10 H18 N4 O6	291.129	70.0658	0.760553	18.014	16.6275	21.5805	22.9583	26.5303	20.0118
SDW00197	MFCD00152656	C18 H37 N O3	316.284	60.0452	9.34345	19.4275	21.5568	22.9893	19.5937	20.5094	22.1828
SDW00208	Cardanolide	C23 H36 O2	345.278	123.044	11.3864	17.1141	ND	ND	23.8882	13.8486	13.8069
SDW00212	10,12-TRICOSADIYNOIC ACID	C23 H38 O2	347.294	123.044	11.6355	21.0528	ND	ND	24.6115	13.7049	14.1303
SDW00213	Unknown	unknown	81.0176	65.9943	0.833866	24.7734	25.0034	23.1987	23.504	23.622	22.4027
SDW00214	NP-008882	C27 H48 O9	539.318	203.052	10.7155	20.503	19.6658	20.4752	14.1094	14.9836	19.5102
SDW00215	Unknown	unknown	72.0815	55.055	0.799439	22.749	21.859	24.9317	22.8688	23.3715	24.228
SDW00216	Unknown	unknown	116.986	98.9758	0.594701	22.5516	21.87	21.6894	23.9643	23.8218	22.6341
SDW00220	Furfuranol	C5 H6 O2	99.0445	56.9656	0.594481	23.5403	22.914	22.1143	24.3538	24.5868	22.8357
SDW00222	D-(+)-Proline	C5 H9 N O2	116.071	70.0658	0.754357	23.9195	24.5454	28.191	25.9071	27.2033	25.166
SDW00223	Unknown	C26 H51 F3 N O5 P	546.352	104.107	11.3974	25.0828	27.0218	23.7774	17.2865	20.0223	22.3173
SDW00225	Cardanolide	C23 H36 O2	345.278	123.044	11.3828	16.8459	ND	ND	23.7363	ND	13.7112
SDW00229	L-(-)-Methionine	C5 H11 N O2 S	150.058	56.0503	0.857633	22.1411	21.3125	24.2843	20.7227	21.4931	22.5131
SDW00230	10,12-TRICOSADIYNOIC ACID	C23 H38 O2	347.294	123.044	11.6339	21.0597	ND	ND	24.61	ND	14.2316
SDW00231	L-Histidine	C6 H9 N3 O2	156.077	110.072	0.646919	23.6815	23.5335	25.3396	23.6276	26.1732	27.9198
SDW00234	Unknown	unknown	98.9757	56.9656	0.590441	23.4619	22.5376	21.4741	24.7202	24.7203	22.9403
SDW00236	Palmitic Acid	C16 H32 O2	274.273	88.0762	8.43657	27.5224	27.2078	26.6127	27.4151	27.6233	27.2472
SDW00237	D-(+)-Proline	C5 H9 N O2	116.071	70.0658	0.754058	23.9231	24.5917	28.1832	25.8807	27.196	25.1616
SDW00239	Unknown	C6 H9 F3 N O P	200.044	98.9757	0.595664	18.737	18.6562	ND	20.5062	19.576	18.8787
SDW00241	Unknown	C22 H27 F3 N2 O4	441.201	177.054	6.84604	17.059	14.6111	27.6392	14.2667	14.9089	15.1164
SDW00244	Oleamide	C18 H35 N O	282.279	69.0706	11.2525	21.9439	21.5454	21.7131	22.2176	22.0636	22.1023
SDW00245	Levulinic acid	C5 H8 O3	117.055	69.0342	0.758516	15.3323	16.7401	18.5328	16.1115	17.5453	15.8201
SDW00249	2-Amino-4-methylpyrimidine	C5 H7 N3	110.072	83.061	0.729239	21.166	20.9824	22.5516	20.9455	23.4622	25.1869
SDW00250	Methylenesuccinate	C5 H4 O4	129.018	68.9978	0.840478	ND	16.3368	19.4845	25.1045	21.3219	19.6837
SDW00256	Adenine	C5 H5 N5	136.062	91.0548	1.05851	24.0204	23.3149	28.2715	23.7247	24.8579	26.9038
SDW00261	5-hydroxy-4-methoxy-5,6-dihydro-2H-pyran-2-one	C6 H8 O4	145.049	85.0289	0.583791	23.8426	21.6231	24.6451	24.9755	24.6934	25.0201
SDW00263	4-(2-Methyl-4-thiazolyl)phenol	C10 H9 N O S	209.074	192.047	2.24755	ND	ND	ND	ND	ND	25.2746
SDW00265	Safingol	C18 H39 N O2	302.305	60.0452	9.90126	22.4691	21.9471	17.8166	17.5727	20.397	21.5693
SDW00266	3-Phenyl-1-propanol	C9 H12 O	136.076	136.062	1.05074	26.4016	25.5843	29.9024	24.8389	26.0934	27.7982
SDW00274	Unknown	unknown	72.0815	55.055	0.787981	22.7082	21.712	24.8992	22.8255	23.3508	24.2358
SDW00275	4-Hydroxybenzaldehyde	C7 H6 O2	123.044	95.0496	0.883367	22.5885	26.4719	26.2542	21.6101	23.2977	24.6401
SDW00277	3-Fluorodihydro-2(3H)-furanone	C4 H5 F O2	105.07	79.0548	2.10884	16.1546	15.5136	16.3136	19.1952	ND	24.5179
SDW00278	Unknown	C2 H2 N4 O S	131.002	98.9758	0.591731	22.0661	21.803	ND	23.2692	23.3164	21.6592
SDW00279	4033747	C26 H52 N O7 P	522.355	104.107	11.0523	25.5088	27.1586	26.5168	21.4686	18.7763	23.3876
SDW00282	Indole-3-lactic acid	C11 H11 N O3	206.081	118.065	4.25082	21.3984	ND	21.2901	17.0803	25.1372	ND
SDW00283	N6-Acetyl-L-lysine	C8 H16 N2 O3	189.123	84.0813	0.796568	21.9056	21.3424	26.5732	22.2917	23.2568	20.8651
SDW00284	N6-Acetyl-L-lysine	C8 H16 N2 O3	189.123	130.05	0.777379	23.3488	20.4136	22.7067	20.9027	22.2493	19.5727
SDW00289	Unknown	C4 H10 O9	203.04	119.019	0.585606	22.1145	19.6673	22.9309	23.4081	22.9403	23.247
SDW00290	2-Oxobutyric acid	C4 H6 O3	103.039	85.029	0.587123	23.0915	20.6475	23.7614	24.142	23.803	24.0383
SDW00297	Unknown	C24 H42 N10 O3	541.334	203.052	11.0255	18.4622	18.5315	20.9587	16.5349	13.3503	16.2743
SDW00298	2-Aminooctadec-4-yne-1,3-diol	C18 H35 N O2	298.273	280.263	9.40419	19.3245	23.6067	24.7513	18.9069	19.5546	23.8038
SDW00303	Unknown	C18 H29 N5 O9	460.202	72.0815	0.762862	20.7342	20.757	25.0588	23.0783	20.5076	24.5023
SDW00305	Unknown	C16 H27 F2 N3 O3 P2 S	459.154	330.111	1.38432	ND	ND	ND	ND	ND	25.2906
SDW00308	Unknown	C27 H49 F2 N2 O3 P	541.334	203.052	11.0249	18.5902	18.6027	21.0558	16.5185	ND	16.2297
SDW00318	NP-008882	C27 H48 O9	539.318	104.107	10.7307	23.2466	23.8389	20.643	ND	ND	15.1991
SDW00319	2-Phenylglycine	C8 H9 N O2	152.07	107.049	0.874242	16.8447	15.4766	18.5053	17.7255	17.1985	24.6471
SDW00321	Unknown	C19 H26 F2 N4 O3 P2	459.154	330.111	0.908252	14.2375	14.1048	ND	ND	16.0551	25.1728
SDW00322	Unknown	C29 H52 N2 O S3	541.334	541.334	11.1118	27.5628	25.7004	27.2461	23.4748	19.886	22.369
SDW00326	Unknown	C7 H2 N6 O3	219.026	98.9757	0.590769	21.1186	20.1264	18.8746	23.1129	23.0956	21.7547
SDW00331	4033747	C26 H52 N O7 P	522.355	104.107	11.0481	25.6446	27.0754	26.5809	21.4794	18.8399	23.2243
SDW00337	2-Amino-1,3,4-octadecanetriol	C18 H39 N O3	318.3	256.263	8.47204	25.3748	25.9877	25.6318	26.6037	26.1978	26.381
SDW00342	Unknown	C20 H32 F2 N3 O7 P	496.202	137.06	0.866298	ND	ND	ND	ND	ND	26.0315
SDW00346	Homo-L-arginine	C7 H16 N4 O2	189.134	70.0658	0.705383	19.535	19.4628	22.4497	25.8044	23.1777	22.4374
SDW00347	Unknown	C27 H44 F N3 O7	542.321	146.982	10.7311	26.1211	26.4456	25.441	17.9868	20.8949	22.7597
SDW00350	2-Amino-1,3,4-octadecanetriol	C18 H39 N O3	318.3	256.263	8.47147	25.4372	26.0055	25.6658	26.6402	26.2276	26.4302
SDW00352	Unknown	C26 H34 N2 O7 S	519.218	160.076	1.60624	ND	13.7088	ND	ND	ND	24.6567
SDW00359	Unknown	C17 H47 F2 N10 O P3	539.319	539.319	10.8166	29.1951	26.4695	26.8001	20.3514	21.7653	24.8773
SDW00361	Xanthine	C5 H4 N4 O2	153.04	110.035	1.21691	19.3874	17.5086	26.6746	17.9664	21.1268	18.6666
SDW00362	Adenosine	C10 H13 N5 O4	268.103	136.062	2.08649	29.4323	28.0266	29.2072	24.0291	22.0675	25.0507
SDW00364	N-Nitro-1-nitroso-4,5-dihydro-1H-imidazol-2-amine	C3 H5 N5 O3	158.996	98.9757	0.589561	23.1138	22.2985	21.4227	24.4147	24.3238	22.6304
SDW00365	2-Phenylglycine	C8 H9 N O2	152.07	107.049	0.870214	16.9301	16.7056	18.726	18.0068	17.4009	24.5691
SDW00366	Unknown	C25 H47 F2 N2 O3 P	515.318	104.107	10.9346	22.9053	23.9234	21.4198	ND	ND	18.5689
SDW00371	Spermidine	C7 H19 N3	146.165	72.0815	0.57712	19.9299	19.3734	22.1004	24.2651	22.8459	23.4113
SDW00374	Acetophenone	C8 H8 O	121.065	103.055	1.14149	19.022	20.3529	22.7479	18.8179	19.2399	26.9043
SDW00379	Unknown	unknown	84.0814	56.0503	0.793055	21.5444	21.1448	23.6098	23.3822	23.8373	24.7406
SDW00380	Prolylleucine	C11 H20 N2 O3	229.154	70.0658	0.912854	25.9054	24.9115	24.1777	24.7064	23.8395	22.7454
SDW00382	2-[1-[4,5-Dihydroxy-3-[(2S,3R,4S,5S,6R)-3,4,5-trihydroxy-6-(hydroxymethyl)oxan-2-yl]oxyoxan-2-yl]indol-3-yl]acetic acid	C21 H27 N O11	470.165	130.065	4.10985	ND	ND	22.5108	ND	ND	ND
SDW00390	D-(+)-Pyroglutamic Acid	C5 H7 N O3	130.05	84.045	0.795033	23.555	22.478	25.7384	25.2925	26.2371	27.5123
SDW00393	2-Acetamidophenol	C8 H9 N O2	152.07	152.057	1.04033	25.3138	19.9962	26.6779	20.1498	ND	26.6883
SDW00394	DIELAIDIN	C39 H72 O5	643.526	361.271	15.5338	ND	ND	ND	ND	ND	ND
SDW00401	4033747	C26 H52 N O7 P	522.355	184.073	11.0463	27.1311	28.662	28.2428	23.3706	20.5371	24.9808
SDW00404	2210	C12 H16 O2	191.971	150.969	2.24667	ND	ND	ND	ND	ND	19.635
SDW00406	methyl 2-{[(1,3,3-trimethylbicyclo[2.2.1]hept-2-yl)amino]sulfonyl}benzoate	C18 H25 N O4 S	390.115	228.063	4.24591	22.4935	ND	22.5104	18.1921	26.4409	ND
SDW00408	Hexadecanamide	C16 H33 N O	256.263	88.0762	11.1343	19.3119	18.9024	18.6682	19.7764	19.4502	19.72
SDW00409	ACPC	C4 H7 N O2	102.055	56.0503	0.769445	20.3119	20.248	22.8272	23.8933	21.8612	21.8563
SDW00412	2-Amino-4-methylpyrimidine	C5 H7 N3	110.072	83.061	0.706853	21.1858	20.9419	22.4554	20.9012	23.3977	25.2411
SDW00415	15-methylhexadecaphytosphingosine	C17 H37 N O3	304.284	60.0452	9.36547	14.8032	18.6845	16.0823	15.9395	16.0281	20.4564
SDW00422	(+)-Thienamycin	C11 H16 N2 O4 S	273.09	167.016	0.857633	13.7187	15.3939	16.1914	17.6196	17.9579	25.2082
SDW00423	Eplerenone	C24 H30 O6	437.193	303.12	8.85017	18.1505	19.9967	19.3216	20.111	20.0068	20.4562
SDW00424	3-O-Isobutyryl-beta-D-fructofuranosyl 3-O-dodecanoyl-4-O-(3-methylbutanoyl)-alpha-D-glucopyranoside	C33 H58 O14	701.371	539.318	10.6143	25.5378	21.4014	23.1599	15.7228	16.8147	20.1815
SDW00427	4-Indolecarbaldehyde	C9 H7 N O	146.06	118.065	2.4993	26.3434	22.0056	24.5619	23.0801	21.9128	25.3592
SDW00429	Dihydrothymine	C5 H8 N2 O2	129.066	68.9978	0.833099	ND	15.2589	19.4791	24.5564	21.0047	21.2445
SDW00430	Pregnane-3,3-diol	C21 H36 O2	321.278	57.0707	11.6362	21.7113	23.038	22.7847	18.9398	18.026	20.1978
SDW00431	5-(2-Nitroprop-1-enyl)-1,3-benzodioxole	C10 H9 N O4	208.06	162.055	3.43247	ND	13.4155	26.2175	ND	ND	ND
SDW00435	1-O-(indol-3-ylacetyl)-beta-D-glucose	C16 H19 N O7	338.123	130.065	4.1089	ND	ND	26.524	ND	ND	13.608
SDW00436	α-Eleostearic acid	C18 H30 O2	279.231	81.0705	10.1618	22.9051	24.7684	18.4316	16.1139	18.0631	23.0421
SDW00439	4-Guanidinobutyric acid	C5 H11 N3 O2	146.092	87.0446	0.791209	25.2844	23.1041	20.6654	21.7866	22.8177	21.2469
SDW00440	D-(+)-Pyroglutamic Acid	C5 H7 N O3	130.05	84.0813	0.791841	23.7477	22.8969	25.8447	25.4165	26.3197	27.5693
SDW00441	Unknown	C20 H42 N2 O	327.336	72.0815	9.98607	15.6848	23.6059	16.9505	17.1817	17.0541	18.0595
SDW00442	Unknown	unknown	56.0503	55.9352	0.938703	24.3943	24.2827	23.6028	24.1585	24.0343	23.3884
SDW00452	Pregabalin	C8 H17 N O2	160.133	60.0815	0.857633	24.1414	15.0929	14.331	14.7448	14.8434	15.2783
SDW00453	Unknown	unknown	84.045	56.0503	0.789252	21.5326	21.0927	23.4969	23.2275	23.7414	24.5792
SDW00459	Stearic Hydrazide	C18 H38 N2 O	299.305	72.0814	9.41089	ND	21.6367	15.6863	17.7278	15.1942	15.2988
SDW00460	Unknown	C18 H46 F N10 P3	515.318	515.318	10.9996	26.7848	27.7992	24.6628	21.8621	21.1017	21.9887
SDW00461	L-Ethionine	C6 H13 N O2 S	164.074	102.055	0.705383	ND	13.7963	23.757	25.7198	17.2752	22.8139
SDW00462	4-(~13~C)Methylbenzoic acid	C7 [13]C H8 O2	138.063	138.055	0.742533	22.0107	24.4602	24.0453	23.4952	25.756	24.2626
SDW00463	γ-Linolenic acid ethyl ester	C20 H34 O2	313.273	57.0707	11.2692	23.5868	22.9175	23.2456	22.2257	22.0274	22.2433
SDW00464	Unknown	C25 H35 N O7 P2	524.197	182.081	0.883367	22.15	21.507	25.968	22.4105	22.4443	25.2549
SDW00467	4'-Chloro-2-hydroxyaurone	C15 H11 Cl O3	275.046	261.03	0.58285	16.437	14.2837	17.7641	19.1085	19.1361	19.1047
SDW00471	methyl 4-oxo-4H-benzo[4,5]imidazo[2,1-b][1,3]thiazine-2-carboxylate	C12 H8 N2 O3 S	261.03	219.02	0.582348	17.6379	16.5389	17.5875	18.0181	17.9544	17.422
SDW00478	Epicatechin 5-O-beta-D-glucopyranoside-3-benzoate	C28 H28 O12	557.165	177.054	7.74861	18.013	20.9792	27.6846	14.8443	13.7026	19.1846
SDW00479	4-Hydroxybenzaldehyde	C7 H6 O2	123.044	95.0496	1.06221	22.1577	ND	26.9262	21.9949	23.2247	25.5593
SDW00484	γ-Linolenic acid ethyl ester	C20 H34 O2	313.273	57.0707	11.2703	23.7146	22.9061	23.2144	22.2367	22.1115	22.3716
SDW00487	NP-001346	C11 H15 N5 O3 S	298.096	136.062	3.78041	25.2307	22.5159	27.6945	26.9731	25.5407	25.9463
SDW00488	Sinapinic acid	C11 H12 O5	207.065	175.039	4.14654	20.142	17.82	24.9988	17.8656	18.1276	20.6464
SDW00490	Pyridoxine	C8 H11 N O3	170.081	152.07	0.862146	22.257	21.9806	21.6979	23.1351	24.137	25.2137
SDW00491	Unknown	C15 H29 N O13	432.17	90.0554	0.749194	19.6056	20.6875	24.531	23.9297	19.1274	22.3732
SDW00499	5-guanidino-2-oxopentanoic acid	C6 H11 N3 O3	174.087	114.055	0.777442	18.958	20.1411	20.8321	21.1619	22.0594	25.0201
SDW00504	4033747	C26 H52 N O7 P	522.355	184.073	10.9379	24.7176	27.0791	27.8177	23.788	19.7531	23.7494
SDW00511	DL-Lysine	C6 H14 N2 O2	147.113	84.0813	0.763779	22.9554	21.5077	25.3097	26.0754	24.8916	26.1646
SDW00513	Pregnane-3,3-diol	C21 H36 O2	321.278	57.0707	11.632	21.7146	23.0118	22.7798	19.5996	17.9473	20.1793
SDW00514	PPG n7	C21 H44 O8	447.286	188.044	11.6695	22.6676	15.5931	14.1223	ND	ND	ND
SDW00516	Methyl (2R,4S,6S,12bR)-4-(4-fluorophenyl)-2-{[2-(4-morpholinyl)ethyl]amino}-1,2,3,4,6,7,12,12b-octahydroindolo[2,3-a]quinolizine-6-carboxylate	C29 H35 F N4 O3	507.271	359.182	10.7044	19.9361	19.0567	20.1051	21.9452	22.0599	22.0621
SDW00517	Unknown	C6 H11 N4 P S	203.052	119.019	0.578369	22.131	19.7725	22.9552	23.3845	23.146	23.3096
SDW00520	Safingol	C18 H39 N O2	302.305	88.0763	9.23471	19.2514	20.5069	20.5499	20.4624	20.4107	20.8934
SDW00524	Unknown	unknown	91.0547	65.0393	0.863628	19.5297	19.3296	23.2131	18.8802	20.5904	24.394
SDW00525	Unknown	C19 H35 F N O3 P3 S	470.158	131.049	4.87146	ND	ND	17.7783	ND	ND	25.1993
SDW00529	Unknown	C11 H5 F O4	221.024	119.019	0.581283	17.2554	15.6883	18.2718	18.2005	17.8852	18.2633
SDW00530	Unknown	unknown	70.0659	68.0502	0.742963	17.5003	18.2832	21.327	19.0442	20.399	18.8715
SDW00531	Unknown	C10 H9 F4 N3 O3	296.065	104.107	0.68035	22.9163	24.8977	19.9481	18.8401	18.5146	20.9957
SDW00534	NP-005196	C15 H22 O5	265.143	111.044	3.91341	ND	ND	ND	23.3543	ND	15.5421
SDW00535	Unknown	unknown	70.0658	68.0502	0.74086	17.5311	18.203	21.3439	19.2529	20.4279	18.6971
SDW00536	D-Sphingosine	C18 H37 N O2	300.289	60.0452	9.56238	19.9921	14.6777	17.6357	ND	13.4684	16.0478
SDW00538	Unknown	C24 H40 N5 O3 P	478.292	337.273	10.7427	24.197	24.9228	24.7522	18.8778	20.5587	22.1121
SDW00539	Epicatechin 5-O-beta-D-glucopyranoside-3-benzoate	C28 H28 O12	557.165	177.054	7.74703	18.1377	21.0106	27.4818	14.8933	13.8427	19.1745
SDW00540	Prolylleucine	C11 H20 N2 O3	229.154	70.0658	0.781334	ND	ND	ND	ND	ND	ND
SDW00542	Quinaprilat	C23 H26 N2 O5	411.191	177.054	6.75847	19.1347	ND	25.6405	ND	ND	13.6868
SDW00545	Unknown	C20 H41 F4 N3 O5	480.308	339.289	11.0525	22.3332	24.4549	24.5548	21.9236	17.9053	22.7285
SDW00546	(2E,2'E)-N,N'-1,4-Butanediylbis[3-(4-hydroxyphenyl)acrylamide]	C22 H24 N2 O4	381.18	147.044	6.66208	15.7063	ND	26.053	13.4453	ND	ND
SDW00548	LSD-d3	C20 H22 [2]H3 N3 O	327.227	313.205	11.5588	20.4343	21.1237	21.2698	19.3856	19.6545	20.2699
SDW00550	2-phenylthiazolidine-4-carboxylic acid	C10 H11 N O2 S	227.084	210.058	2.24481	ND	ND	14.0678	ND	ND	24.3743
SDW00553	1-Myristoyl-2-hydroxy-sn-glycero-3-PE	C19 H40 N O7 P	426.261	285.242	10.3651	18.3119	23.7532	15.7504	19.2888	16.2953	18.4858
SDW00555	Unknown	C18 H34 F N O15	524.197	182.081	0.8794	21.8809	21.3392	25.8698	22.319	22.3179	25.1934
SDW00556	Anisole	C7 H8 O	109.029	81.034	0.767638	21.2823	21.668	21.6837	22.6504	23.3839	22.9192
SDW00563	Unknown	C18 H34 F N O7 P2	458.186	458.186	0.724636	21.1658	20.7866	24.8104	22.153	22.2332	22.4023
SDW00568	Unknown	C5 H2 O3	111.008	68.9978	0.80791	18.15	17.918	15.968	22.0393	17.8027	18.6038
SDW00572	Unknown	C22 H36 F2 N3 O3 P S2	524.197	165.055	0.877581	19.9233	22.1079	24.5883	19.8437	21.5468	23.2585
SDW00574	Pyracarbolid	C13 H15 N O2	235.144	147.044	3.11645	16.3614	18.1121	25.8302	13.3712	ND	ND
SDW00575	N-[(Benzyloxy)carbonyl]cysteine	C11 H13 N O4 S	273.09	167.016	0.857633	13.9222	13.8234	16.0332	17.7185	17.9813	25.2281
SDW00578	5-Bromo-2-chlorobenzoic acid	C7 H4 Br Cl O2	234.917	118.086	0.730015	27.5059	18.9533	17.2094	ND	ND	ND
SDW00582	Unknown	C25 H38 F4 O2	447.286	187.036	11.8176	19.256	21.4809	22.4076	19.2452	19.1951	19.0831
SDW00585	1,5-Naphthalenediamine	C10 H10 N2	159.092	132.081	2.49759	25.4416	21.2141	23.6583	22.1305	21.0648	24.391
SDW00587	Unknown	C23 H36 F N7 O3	478.292	337.273	10.742	24.2487	24.9939	24.7081	18.8201	20.4708	22.0019
SDW00589	Eplerenone	C24 H30 O6	437.193	303.12	8.84458	18.109	19.9927	19.3717	20.1447	20.0133	20.4447
SDW00592	N-Butylbenzenesulfonamide	C10 H15 N O2 S	214.089	141	7.06579	21.565	22.2115	22.0805	22.3076	22.4606	22.4384
SDW00597	NP-020521	C18 H32 O3	319.224	301.213	9.66353	22.3083	24.5049	21.3266	23.6249	22.3675	25.5108
SDW00599	Unknown	C25 H44 F N3 O7	518.323	184.073	10.3043	22.9407	23.5559	24.633	22.0068	22.2265	26.2318
SDW00604	7-Methoxy-4H-chromen-4-one	C10 H8 O3	177.054	145.028	4.0045	20.7167	16.2459	21.7862	21.9492	22.9571	25.7409
SDW00606	Unknown	C35 H70 N2 O10	701.492	683.482	6.7026	24.4837	23.546	23.7738	23.7423	23.7986	23.6098
SDW00616	8-Hydroxy-7-nitroso-5-quinolinesulfonic acid	C9 H6 N2 O5 S	256.129	155.081	0.868107	19.316	21.0181	21.3317	25.6311	22.886	21.9926
SDW00617	ETHYL 2-(HYDROXYIMINO)-6-NITROHEXANOATE	C8 H14 N2 O5	220.118	90.0555	2.15949	23.309	23.5509	24.3574	23.6538	22.3151	24.0195
SDW00618	Xanthine	C5 H4 N4 O2	153.041	110.035	1.19835	19.3042	16.8916	25.7032	15.5253	20.9853	17.4358
SDW00619	Unknown	C18 H45 N10 O4 P	497.342	497.342	10.9285	28.0847	28.9847	28.0452	23.2706	22.981	26.0569
SDW00622	Unknown	C10 H23 N4 O2 P3	363.068	189.134	0.719583	14.9184	14.0507	ND	ND	15.054	ND
SDW00627	1,1'-Oxybis[3-(ethylamino)-2-propanol]	C10 H24 N2 O3	221.186	104.107	0.710678	24.3977	21.2907	20.3217	ND	14.8609	ND
SDW00634	2-morpholinoacetic acid	C6 H11 N O3	146.081	82.0657	0.760869	20.4978	21.8415	19.2968	18.7349	24.3474	18.7479
SDW00635	Phosphoric acid	H3 O4 P	98.9846	56.9656	0.596272	24.0692	23.3014	22.4199	24.8797	24.8497	23.2487
SDW00639	D-(+)-Maltose	C12 H22 O11	365.105	203.052	0.759243	21.8362	24.9128	26.0573	25.9533	25.4904	25.3068
SDW00646	alpha-Ketoglutaric acid	C5 H6 O5	147.029	119.049	0.890774	20.9757	22.6233	25.2093	20.5428	22.3196	23.4254
SDW00648	Indole	C8 H7 N	118.065	91.0547	2.50465	27.1946	22.8836	25.4913	23.9711	22.7966	26.2332
SDW00653	1,5-Isoquinolinediol	C9 H7 N O2	162.055	116.05	3.4343	ND	13.8161	26.2259	13.3847	14.8726	13.4913
SDW00655	Unknown	C24 H46 F4 N O7 P3 S	662.222	161.059	4.20793	ND	13.8028	14.7721	13.8846	ND	24.8109
SDW00656	Unknown	C10 H15 F N2 O3 P2	293.063	70.0658	0.719583	17.2027	14.8388	16.9306	18.1043	20.8082	15.8386
SDW00663	Unknown	C19 H48 F2 N8 O2 P2	521.342	521.342	10.7299	24.2208	24.8734	23.5265	14.8259	18.9976	19.0472
SDW00667	Unknown	C28 H49 F4 N O3	546.353	104.107	11.4006	24.7113	26.5765	23.429	16.9087	19.5337	21.8741
SDW00668	Schaftoside	C26 H28 O14	565.155	427.102	5.23325	25.1749	21.4416	19.5779	ND	14.105	15.3363
SDW00678	Unknown	unknown	69.0342	53.003	0.774273	14.8305	15.6574	14.8152	17.2007	17.6306	15.7717
SDW00679	Unknown	C3 H3 F3 O P2	174.969	119.019	0.590446	21.7666	19.8925	22.6276	23.0005	22.7581	22.87
SDW00681	Unknown	C20 H39 F4 N4 O4 P	507.271	195.003	11.8008	20.4025	22.6778	23.0876	17.4214	17.495	23.4911
SDW00683	Unknown	C3 H5 N2 O P	117.022	103.006	0.589796	22.3536	20.1043	23.1328	23.4895	23.301	23.4844
SDW00689	Spermidine	C7 H19 N3	146.165	72.0815	0.56844	20.5099	19.5688	22.3074	24.2539	22.9225	23.4541
SDW00690	(5R)-3-[(1R)-1-Hydroxyoctyl]-5-methyl-2(5H)-furanone	C13 H22 O3	227.091	181.049	4.21947	19.0104	15.1632	16.6648	13.655	16.5961	23.4716
SDW00691	5-Hydroxyindole-3-acetic acid	C10 H9 N O3	192.065	146.06	4.11447	16.7775	18.444	24.9704	ND	13.851	15.5209
SDW00693	C20 sphinganine	C20 H43 N O2	330.336	88.0763	9.85525	19.7356	21.0312	17.7853	19.3438	19.759	20.2502
SDW00696	Lauryldimethylamine oxide	C14 H31 N O	230.247	57.0707	8.56391	22.2103	22.1215	21.7601	22.2143	22.3977	22.4021
SDW00697	Unknown	C17 H26 N8 O4	407.214	325.211	11.4073	25.0153	24.8751	24.7074	20.5838	21.3393	23.6872
SDW00698	NP-005196	C15 H22 O5	265.143	111.044	4.63656	ND	ND	ND	22.9319	15.393	13.6384
SDW00700	[Similar to: Escaline; ΔMass: -105.1360 Da]	C2 H6 N2 P2	121.008	103.055	1.72346	19.7343	18.5055	23.4092	20.9017	22.7104	22.0359
SDW00703	Adenine	C5 H5 N5	136.062	119.035	2.09001	26.3406	24.9315	26.2173	20.7837	18.7018	21.846
SDW00705	Unknown	C5 H7 N2 O4 P	191.022	98.9757	0.593928	20.4563	19.408	ND	21.1988	21.0727	19.1976
SDW00707	Unknown	C11 H22 F O6 P3	363.068	363.068	0.885695	ND	ND	ND	24.8964	24.4441	23.5989
SDW00708	Coenzyme Q2	C19 H26 O4	319.194	56.9656	11.3819	23.7322	23.9056	23.602	18.3065	19.2137	21.6593
SDW00717	Glutaric anhydride	C5 H6 O3	115.039	70.0658	0.722823	16.7334	17.9502	17.07	19.8106	21.8242	16.9794
SDW00719	Unknown	C36 H51 F5 N2 O3	677.371	515.319	10.8274	26.7479	23.838	25.2964	22.501	18.1798	24.2731
SDW00720	(1S,4aS,7aS)-7-({[(2E)-3-phenylprop-2-enoyl]oxy}methyl)-1-{[(2S,3R,4S,5S,6R)-3,4,5-trihydroxy-6-(hydroxymethyl)oxan-2-yl]oxy}-1H,4aH,5H,7aH-cyclopenta[c]pyran-4-carboxylic acid	C25 H28 O11	543.132	381.079	0.753449	25.9426	24.7203	26.6217	27.1268	25.316	27.9115
SDW00723	O-Arachidonoyl ethanolamine	C22 H37 N O2	348.287	70.9883	11.6436	ND	ND	ND	16.1728	ND	ND
SDW00725	Unknown	C19 H38 N7 O5 P	476.276	335.257	10.336	19.98	20.6701	21.2368	21.5222	20.3073	25.0728
SDW00729	Unknown	C9 H20 F3 N6 O3 P	349.135	175.119	0.837169	21.4659	18.0443	18.1341	26.0559	24.7622	23.2023
SDW00739	Unknown	C11 H21 F3 N3 O2 P	316.138	137.06	0.881019	14.8321	14.897	15.9685	13.782	15.4817	25.7465
SDW00740	Unknown	unknown	81.0341	81.0176	0.824514	25.638	25.8488	24.1105	24.6565	25.1047	23.5062
SDW00742	Sotrastaurin	C25 H22 N6 O2	438.238	147.044	5.30881	13.2943	ND	24.8863	14.1573	ND	ND
SDW00744	2,6-Dimethyl-4,10-dioxatricyclo[5.2.1.0~2,6~]decane-3,5-dione	C10 H12 O4	197.081	151.039	3.91917	20.1693	16.2835	15.8974	14.3348	17.3183	24.4239
SDW00746	C16 phytosphingosine	C16 H35 N O3	290.269	242.248	8.67078	21.5313	23.4296	22.3481	22.7558	23.2005	23.6951
SDW00748	Oleamide	C18 H35 N O	282.279	69.0706	11.2591	22.2345	22.031	21.7193	22.2814	22.0084	22.1224
SDW00754	Unknown	C20 H33 F N4 O5	429.252	313.204	11.2776	22.7358	21.6883	22.3904	21.4463	21.3002	21.3097
SDW00758	Unknown	C40 H73 F O P2	673.5	337.234	11.9754	24.375	18.2617	17.5121	ND	14.4387	15.3234
SDW00766	Unknown	C39 H70 F3 N5 O3	736.532	482.308	12.2746	23.3417	18.6307	22.8743	24.4242	24.7283	15.162
SDW00768	trans-Aconitic acid	C6 H6 O6	175.024	70.0658	0.718105	24.861	24.3263	24.8212	29.9075	30.5426	27.2212
SDW00769	6-Methylquinoline	C10 H9 N	144.081	117.07	2.50312	26.2153	21.8963	24.4771	22.9873	21.8774	25.2051
SDW00771	Unknown	C36 H62 F3 N O	582.485	564.526	12.7112	21.3612	18.2764	14.5803	ND	17.3272	13.8044
SDW00775	Octyl decyl phthalate	C26 H42 O4	441.297	315.156	12.0268	18.1508	18.0339	18.111	17.9819	18.2735	17.9323
SDW00778	Unknown	C26 H53 F N6 O13	677.371	515.319	10.8258	26.6962	23.7268	25.2559	22.3852	18.089	24.1795
SDW00785	[Similar to: 2-{2-[(2Z)-pent-2-en-1-yl]-3-{[3,4,5-trihydroxy-6-(hydroxymethyl)oxan-2-yl]oxy}cyclopentyl}acetic acid; ΔMass: -242.2431 Da]	C H F3 P2	132.958	119.019	0.602567	17.6815	15.7182	18.5577	18.5135	18.4612	18.6704
SDW00787	Unknown	unknown	103.006	103.006	0.585503	23.2353	21.6866	23.3752	24.0727	23.8622	23.6384
SDW00788	1-Hexadecanoylpyrrolidine	C20 H39 N O	332.292	70.9939	11.9008	14.9481	16.5615	16.2279	15.2341	15.9908	15.354
SDW00791	4-{5-[(4-methylphenyl)methylene]-4-oxo-2-thioxo-1,3-thiazolan-3-yl}-N-(1,3-thiazol-2-yl)benzenesulfonamide	C20 H15 N3 O3 S4	337.171	70.0659	0.720767	16.862	15.8803	17.3585	21.1929	25.5091	17.8596
SDW00792	2-Phenylglycine	C8 H9 N O2	152.07	107.049	0.879601	16.7235	16.3547	18.6302	18.3154	17.5958	24.97
SDW00802	Unknown	unknown	145.977	131.961	0.577505	18.999	18.1423	18.5148	18.6805	18.2309	21.7943
SDW00803	Unknown	C22 H37 F N6 O5	507.271	195.003	11.7989	20.335	22.6001	ND	17.2247	17.2062	23.4127
SDW00805	Asparagine	C4 H8 N2 O3	133.061	74.0243	0.768222	24.2367	23.4722	23.0225	20.6508	19.4922	23.9845
SDW00808	D-(+)-Maltose	C12 H22 O11	365.105	203.052	0.74624	21.9369	25.0528	26.0579	25.9036	25.4753	25.3798
SDW00809	Unknown	C3 H8 N2 O3 S	153.034	139.018	0.599976	14.9831	14.3883	14.5821	15.3929	15.3825	17.6551
SDW00811	ANHYDROMETHYLENECITRIC ACID	C7 H8 O7	243.02	219.02	0.580617	14.3212	ND	15.1525	16.0127	15.6834	15.9867
SDW00819	1-Linoleoyl glycerol	C21 H38 O4	337.273	81.0705	11.0884	21.8999	21.9996	21.9006	15.9446	14.7492	18.1327
SDW00824	γ-Linolenic acid ethyl ester	C20 H34 O2	313.273	57.0707	11.2795	23.6345	22.886	23.3829	22.2645	22.0772	22.3496
SDW00827	6-Methylindole	C9 H9 N	132.081	117.058	2.50276	26.5394	22.3441	24.8093	23.382	22.3073	25.5492
SDW00828	Daucosterol	C35 H60 O6	599.427	67.0549	13.2164	20.5649	21.1955	20.1122	16.9345	15.3342	17.0169
SDW00832	Unknown	C21 H41 F N2 O9	507.269	195.003	12.0328	21.8357	24.0082	24.4981	17.1276	16.4166	ND
SDW00837	Asparagine	C4 H8 N2 O3	133.061	74.0243	0.771457	24.1031	23.2426	22.9547	20.4948	19.4695	23.9941
SDW00847	Unknown	C2 H7 N O2 S3	173.972	131.961	0.588335	21.6746	21.283	21.1292	21.0285	20.464	23.5447
SDW00849	Unknown	C38 H76 F4 N3 P S	736.533	595.472	12.6217	18.1145	19.9042	20.2393	26.0242	25.0917	26.216
SDW00853	(-)-Epicatechin	C15 H14 O6	291.086	139.039	3.45436	ND	ND	ND	23.4131	25.6109	19.0978
SDW00859	2-[1-[4,5-Dihydroxy-3-[(2S,3R,4S,5S,6R)-3,4,5-trihydroxy-6-(hydroxymethyl)oxan-2-yl]oxyoxan-2-yl]indol-3-yl]acetic acid	C21 H27 N O11	470.165	172.076	4.10889	ND	ND	23.4636	ND	ND	ND
SDW00868	NP-013179	C26 H32 O5	463.183	447.152	6.84702	ND	ND	20.4415	ND	ND	ND
SDW00869	Fluopyram	C16 H11 Cl F6 N2 O	397.055	199.018	0.793371	17.6323	18.6861	18.2	19.3045	17.572	17.5244
SDW00871	Unknown	unknown	63.9985	62.9907	0.826317	22.0572	22.3518	20.4863	20.9034	20.8547	19.3954
SDW00876	Coenzyme Q2	C19 H26 O4	319.194	56.9656	11.3803	23.6813	23.8819	23.5289	18.3055	19.2203	21.6044
SDW00884	Linoleamide	C18 H33 N O	280.263	67.055	9.40396	15.6871	19.737	20.8482	15.9532	16.4368	19.9529
SDW00886	Adenosine 5'-monophosphate	C10 H14 N5 O7 P	348.07	136.062	0.869301	23.6447	21.5379	28.5445	25.7834	25.3706	26.1387
SDW00888	Levulinic acid	C5 H8 O3	117.055	69.0342	0.742739	15.1043	16.3472	18.7108	16.3834	17.8183	16.1133
SDW00890	5-[(Z)-Pentadec-8-enyl]benzene-1,3-diol	C21 H34 O2	319.263	123.044	11.2485	ND	ND	ND	21.1448	ND	ND
SDW00896	Prolylleucine	C11 H20 N2 O3	229.154	70.0658	1.20516	25.9116	24.2951	23.6189	24.2228	23.0702	22.4025
SDW00899	Unknown	C19 H19 N5 O8	446.129	151.039	2.03106	ND	ND	ND	ND	ND	24.2926
SDW00900	Unknown	C3 H2 N3 O4 P	175.985	98.0605	0.740184	21.0256	20.1022	18.8023	19.3675	20.7544	19.3296
SDW00902	Unknown	C14 H18 F3 N O5	338.123	130.065	4.10775	ND	ND	26.4447	ND	ND	ND
SDW00903	Unknown	C23 H20 N10	437.193	437.193	8.8393	22.972	25.0711	24.4508	25.2634	25.1664	25.5799
SDW00904	Adenine	C5 H5 N5	136.062	136.062	2.10583	27.8418	26.3014	27.645	22.1952	20.5362	23.1805
SDW00907	N-{4-[(2R,3R)-3-(Hydroxymethyl)-5-oxo-2-morpholinyl]phenyl}methanesulfonamide	C12 H16 N2 O5 S	323.073	185.042	2.50432	ND	ND	18.6485	25.5564	21.8719	21.9712
SDW00908	Unknown	C4 H9 F N4 S	165.061	119.019	0.883132	19.7076	21.6789	23.9608	19.1201	21.0448	22.1608
SDW00910	11-piperidino-2,3-dihydro-1H-cyclopenta[4,5]pyrido[1,2-a]benzimidazole-4-carbonitrile	C20 H20 N4	317.178	56.9656	11.1252	21.0509	21.4511	21.3379	19.7406	16.8891	21.9255
SDW00912	Unknown	C40 H61 F3 N4	655.49	319.224	13.2236	22.0949	22.6524	21.5569	15.0492	17.6733	18.2244
SDW00913	2-(2-Heptadecyl-2-imidazolin-1-yl)ethanol	C22 H44 N2 O	353.352	72.0814	10.1172	15.1446	21.0396	16.7125	14.6991	ND	15.9166
SDW00920	1913256	C18 H30 O	263.237	104.993	11.3732	22.3823	23.2635	22.5376	19.7257	20.3109	21.7082
SDW00922	5'-O-beta-D-Glucosylpyridoxine	C14 H21 N O8	332.133	108.081	0.86895	22.9668	24.2409	19.7539	22.1784	26.0327	22.6128
SDW00923	DL-Tryptophan	C11 H12 N2 O2	409.186	188.071	2.50109	23.6068	16.4013	19.6273	17.1806	15.59	21.7597
SDW00925	Linoleamide	C18 H33 N O	302.245	302.144	11.1231	24.464	24.9944	24.8425	23.0994	21.0398	25.1424
SDW00929	Unknown	C34 H68 N2 O9	649.501	337.235	12.0937	23.7078	17.099	16.3534	15.5457	15.1964	17.1665
SDW00931	Unknown	C6 H3 N6 P	191.022	98.9758	0.585222	18.9132	17.8879	16.9411	20.8817	21.053	18.9428
SDW00939	5-[(Z)-Pentadec-8-enyl]benzene-1,3-diol	C21 H34 O2	319.263	123.044	11.2487	ND	ND	13.4507	21.124	ND	ND
SDW00940	Amoxapine	C17 H16 Cl N3 O	314.105	161.06	4.19137	ND	13.8909	15.4747	16.1833	14.6361	21.9038
SDW00944	4-benzyltoluene	C14 H14	184.073	86.0969	0.760847	21.9713	22.1969	24.9519	21.761	21.9458	20.9161
SDW00946	glycidyl oleate	C21 H38 O3	339.289	69.0706	11.3623	20.3172	22.6723	21.9763	19.25	14.5373	17.071
SDW00949	2-(3-Butoxy-2-hydroxypropyl)malonohydrazide	C10 H22 N4 O4	263.171	118.086	0.784009	23.3922	19.7179	16.3367	13.8256	15.5743	14.2526
SDW00950	Unknown	C34 H47 N3 O S	546.352	104.107	11.393	24.6779	26.6791	23.3133	17.024	19.558	21.9166
SDW00952	Unknown	unknown	117.074	98.9758	0.57319	22.1952	21.8867	20.3683	23.1004	23.062	21.3714
SDW00954	(2Z)-5-(1,2,4a,5-tetramethyl-7-oxo-1,2,3,4,4a,7,8,8a-octahydronaphthalen-1-yl)-3-methylpent-2-enoic acid	C20 H30 O3	301.211	301.141	11.1248	26.1729	26.9854	26.5301	24.2055	20.9846	26.809
SDW00956	Unknown	C13 H25 F4 N4 O3 P3	455.115	455.115	0.721417	19.3553	18.0855	24.1605	18.3775	17.4043	20.7908
SDW00958	1,5-Isoquinolinediol	C9 H7 N O2	162.055	116.05	3.43039	ND	14.9614	25.9623	ND	14.7859	ND
SDW00960	2475675	C23 H34 O2	343.262	81.0705	11.1627	14.4898	14.3427	15.1362	18.2416	ND	13.3326
SDW00962	2-{(2-Hydroxyethyl)[3-(tridecyloxy)propyl]nitroryl}ethanol	C20 H43 N O4	362.326	300.289	8.49512	23.1623	23.0173	22.9466	23.5856	23.0914	23.3779
SDW00963	Unknown	C19 H31 F3 N2 O4	409.229	327.227	11.6572	24.1864	24.9316	24.5699	21.8636	21.0645	23.0626
SDW00964	Unknown	C19 H38 F4 N O3 P3 S	530.18	191.07	4.97513	ND	ND	17.922	13.7149	ND	24.328
SDW00965	3,4,5-Trimethoxy-N-(6-methyl-2-pyridinyl)benzamide	C16 H18 N2 O4	303.133	140.07	0.857714	16.7538	15.9685	18	15.583	16.1251	23.8772
SDW00967	Unknown	C7 H9 N2 O4 P	217.038	98.9758	2.15385	16.0626	ND	20.2328	13.3698	13.9768	22.9352
SDW00969	AM9627000	C8 H7 N O3	166.05	95.0496	4.24692	ND	ND	23.1118	ND	ND	ND
SDW00972	Demeton-S-Methyl-Sulfone	C6 H15 O5 P S2	263.061	161.029	0.576058	20.8457	18.5035	21.6054	21.9361	21.8679	22.124
SDW00973	Unknown	C36 H69 F O6	617.513	81.0705	13.2214	20.3219	21.2553	19.8867	17.7807	15.6321	17.54
SDW00979	2387022	C25 H44 O2	377.341	57.0707	12.217	21.3734	ND	ND	14.3688	15.0738	ND
SDW00980	2475675	C23 H34 O2	343.262	81.0704	11.162	13.936	14.9923	15.0818	18.2366	ND	13.3433
SDW00982	Demeton-S-Methyl-Sulfone	C6 H15 O5 P S2	263.06	161.029	0.574518	21.0832	18.8114	21.9056	22.0814	21.9616	22.1277
SDW00983	Unknown	C33 H67 N4 O5 P	631.49	319.224	13.4563	21.623	21.4567	20.6668	18.7861	19.3005	20.9139
SDW00984	leucoline	C9 H7 N	130.065	130.065	3.65392	19.571	18.9596	27.1586	19.9917	17.0305	17.5397
SDW00987	2,3,4,9-Tetrahydro-1H-β-carboline-3-carboxylic acid	C12 H12 N2 O2	217.097	144.081	3.15372	24.4916	18.2899	18.4941	18.6917	17.4034	18.119
SDW00992	DL-Homoserine	C4 H9 N O3	120.066	74.0607	0.772839	20.7287	20.9359	22.6852	22.0087	22.5493	21.4563
SDW00995	2-Hydroxyquinoline	C9 H7 N O	146.06	128.049	4.11054	17.4751	18.8763	25.3231	13.8891	17.7254	18.5935
SDW00998	α-Lactose	C12 H22 O11	360.149	85.029	0.80158	17.8274	19.6103	20.1856	ND	ND	ND
SDW00999	leucoline	C9 H7 N	130.065	130.065	3.38496	13.3185	19.3502	26.9702	14.9842	ND	16.0226
SDW01001	1-lauroyl-sn-glycero-3-phosphocholine	C20 H42 N O7 P	440.277	299.258	10.6801	18.3333	18.5982	17.1599	15.1855	15.0628	20.1014
SDW01002	Spirost-5-en-3-ol	C27 H42 O3	415.32	271.205	10.599	ND	ND	ND	ND	ND	21.0696
SDW01004	L-Aspartic acid	C4 H7 N O4	134.045	74.0243	0.769586	22.451	22.5618	23.3526	23.8764	22.2042	21.4485
SDW01009	Unknown	unknown	84.0813	56.0503	0.793264	21.9691	21.2952	23.4124	23.3136	23.7677	24.6355
SDW01011	Unknown	C2 H F5 O	137.001	137.001	0.872366	22.5052	22.1548	25.4167	20.7197	22.9151	29.6116
SDW01013	Unknown	C7 H N3 O	144.02	144.02	0.756377	22.3289	26.6949	21.6339	21.4476	22.9287	20.4243
SDW01014	Ro 20-1724	C15 H22 N2 O3	279.17	177.054	3.91663	16.2423	14.269	25.1171	13.9668	15.5602	14.909
SDW01015	C16 phytosphingosine	C16 H35 N O3	290.268	60.0452	9.01131	ND	20.5145	14.3987	15.0821	14.2934	13.9215
SDW01017	Unknown	unknown	98.9847	56.9656	0.582762	24.0396	23.299	22.0291	24.8825	24.8378	23.0499
SDW01021	Unknown	C33 H46 Cl N O3	540.322	540.322	10.8127	27.7281	24.8029	24.8918	19.0528	19.975	24.7228
SDW01022	Unknown	C17 H43 F4 N10 O3 P	543.324	543.324	10.7241	28.2549	28.6222	27.3655	20.5042	23.059	24.4387
SDW01023	Nicotinic acid	C6 H5 N O2	124.039	80.0501	0.864652	24.3981	24.4256	24.5074	26.4888	21.9906	19.6529
SDW01025	Unknown	C3 H9 F2 N2 O2 P	175.045	119.019	4.14501	14.1639	14.4871	21.1519	14.4842	16.4767	16.5914
SDW01026	Unknown	C6 H3 N6 P	191.022	98.9757	0.586824	20.1271	19.2739	17.9421	21.3222	21.5678	19.641
SDW01033	Niacin	C6 H5 N O2	124.039	124.039	0.875008	25.8994	26.3424	26.5313	27.9971	23.7971	22.9303
SDW01034	Octylamine	C8 H19 N	130.159	130.159	2.96894	ND	20.3921	27.068	20.3388	22.4964	20.5513
SDW01039	Unknown	C16 H26 N5 O4 P3	446.129	151.039	1.79085	ND	ND	ND	ND	ND	24.7664
SDW01051	2-Acetyl-4-hydroxyphenyl beta-D-glucopyranoside	C14 H18 O8	332.133	85.029	2.42064	16.2302	ND	21.6594	19.625	15.1146	ND
SDW01052	Asarone	C12 H16 O3	209.117	152.969	7.98964	ND	ND	14.9429	ND	ND	21.287
SDW01054	Unknown	C8 H22 N2 O3 P2 S	289.091	127.039	0.764481	20.0175	20.2691	19.3665	21.0745	21.0554	18.2345
SDW01056	Adenosine 5'-monophosphate	C10 H14 N5 O7 P	348.07	136.062	0.862914	23.5067	21.4086	28.6077	25.7467	25.4274	26.1955
SDW01057	Nicotinamide	C6 H6 N2 O	123.055	80.0501	1.40432	20.6351	19.6133	24.4667	24.195	21.0153	22.6221
SDW01059	dimethyl itaconate	C7 H10 O4	159.065	70.0659	0.744472	17.8314	16.8689	21.1771	20.0442	23.1184	18.2861
SDW01060	Unknown	unknown	91.0547	65.0393	0.869145	19.2437	19.7234	23.0791	18.6542	20.3214	24.2882
SDW01062	Unknown	unknown	111.024	83.061	0.577629	25.4729	23.5762	26.419	26.7576	26.7273	26.9743
SDW01064	Guanosine	C10 H13 N5 O5	284.098	152.056	1.33158	24.2395	22.6403	24.9713	21.052	21.9423	22.9749
SDW01065	GSK1614235 FREE BASE	C28 H45 N3 O7	537.303	203.052	10.4268	16.9143	17.1329	17.4933	17.9919	16.9314	19.6465
SDW01069	Unknown	C33 H70 N O2 P S	576.494	576.494	13.4185	24.6287	23.9585	23.5996	22.4317	21.5169	23.3856
SDW01070	Unknown	C2 H7 N2 O5 P	171.016	96.0686	0.734935	19.1691	18.8031	20.2719	18.1629	19.521	18.309
SDW01077	Dimethyl 2,2'-(acetylimino)diacetate	C8 H13 N O5	204.086	138.055	0.747204	20.0619	22.7905	21.0079	16.1628	19.162	ND
SDW01085	ascr#27	C22 H40 O6	401.289	57.0707	11.0055	15.357	19.4383	16.584	15.5477	14.3396	14.9966
SDW01086	Schaftoside	C26 H28 O14	565.155	511.123	5.2251	25.9538	22.4059	20.3462	ND	14.7889	16.1205
SDW01092	DL-Tryptophan	C11 H12 N2 O2	227.079	96.006	2.76912	18.0606	14.0501	ND	13.8914	15.1272	16.0287
SDW01094	Unknown	C3 H4 F N7 O S	206.026	128.023	0.471774	17.7282	17.4384	17.5718	17.6269	17.1415	17.4097
SDW01096	(2S)-N-[(2S,4S,5S)-5-Formamido-4-hydroxy-1,6-diphenyl-2-hexanyl]-3-methyl-2-(2-oxotetrahydro-1(2H)-pyrimidinyl)butanamide	C28 H38 N4 O4	495.296	147.044	3.66296	14.999	ND	25.1527	18.1184	16.0407	15.2972
SDW01109	Unknown	C20 H38 F N2 O6 P	453.252	337.204	11.0801	21.5425	21.1395	21.5844	15.8343	15.2166	17.6575
SDW01110	1,6-Nonadiene-3,8-diyn-5-one	C9 H6 O	131.049	103.055	1.708	22.5443	21.1339	26.3369	23.6053	25.6085	24.9879
SDW01115	Cyclopenta[c]pyran-7-carbaldehyde	C9 H6 O2	147.044	119.049	1.05424	21.8916	22.0118	26.2346	21.8732	22.7654	24.9296
SDW01120	Unknown	C34 H54 N4 O10	701.371	539.319	10.6192	25.6231	21.5327	23.2659	15.7333	16.8751	20.2507
SDW01122	Pentamethylbenzene	C11 H16	149.023	121.029	9.83792	24.9795	24.5236	16.4255	24.263	24.632	24.5505
SDW01123	5-O-(indol-3-ylacetyl)-myo-inositol D-galactoside	C22 H29 N O12	522.158	360.105	3.55009	ND	ND	25.9847	ND	ND	14.2879
SDW01125	N'-(4-Cyano-3-methylpyrido[1,2-a]benzimidazol-1-yl)-N,N-dimethyliminoformamide	C16 H15 N5	278.145	149.012	10.8146	14.0266	15.4401	ND	13.8917	ND	14.9085
SDW01128	Unknown	C36 H69 F O6	617.513	81.0705	13.2241	20.2895	21.2366	19.8396	17.7381	15.7391	17.5119
SDW01134	Asparagine	C4 H8 N2 O3	133.061	74.0243	0.759337	24.4567	23.73	22.938	20.6725	19.3573	23.9958
SDW01139	ETHYL 2-(HYDROXYIMINO)-6-NITROHEXANOATE	C8 H14 N2 O5	220.118	90.0554	2.14664	23.3315	23.6313	24.3963	23.7261	22.3821	24.0568
SDW01142	Unknown	C18 H44 F3 N10 O2 P	521.342	521.342	10.726	24.1108	24.872	23.4694	17.2596	19.047	19.5925
SDW01146	1,5-Dimethyl-1H-pyrazol-3-amine	C5 H9 N3	111.056	83.0609	0.576921	25.4834	23.5899	26.3198	26.6292	26.7325	26.9609
SDW01147	Uracil	C4 H4 N2 O2	113.035	70.0294	1.14595	22.8775	22.1125	22.7045	18.2346	18.7484	18.2215
SDW01153	Unknown	C12 H16 O11	337.076	97.0288	0.737184	15.3085	14.8611	17.0718	20.4394	22.9302	15.9275
SDW01154	Picolinic acid	C6 H5 N O2	125.071	110.048	0.741622	16.2513	14.7518	16.0886	14.2684	15.7873	25.6255
SDW01155	N1-[5-chloro-6-methyl-2-(2-pyridyl)pyrimidin-4-yl]-N2-[6-(trifluoromethyl)-2-pyridyl]ethane-1,2-diamine	C18 H16 Cl F3 N6	409.11	185.042	4.14925	13.939	ND	23.9135	15.532	17.3563	19.7017
SDW01156	1-Stearoyl-2-hydroxy-sn-glycero-3-PE	C23 H48 N O7 P	482.324	104.107	10.6612	21.4198	21.0863	18.7619	14.0086	15.171	19.7204
SDW01157	Flurazepam	C21 H23 Cl F N3 O	388.16	85.029	5.26943	13.6455	ND	13.7654	19.5167	ND	15.5321
SDW01160	Unknown	C16 H22 F N O4 P2	374.107	124.039	2.25697	25.6229	25.513	18.4221	15.3124	14.168	17.6413
SDW01166	Sphingosine (d18:1)	C18 H37 N O2	322.271	322.174	11.6387	24.0457	25.5147	25.0946	21.5213	20.5756	22.9797
SDW01168	1-linoleoyl-sn-glycero-3-phosphoethanolamine	C23 H44 N O7 P	478.292	337.273	10.7471	24.2439	24.9512	24.7469	18.7491	20.6165	22.0629
SDW01169	N~6~-(Carboxymethyl)-L-lysine	C8 H16 N2 O4	205.118	82.0657	0.743023	21.0904	22.1763	21.3356	17.3941	18.76	17.3203
SDW01172	Propylparaben	C10 H12 O3	181.086	140.047	5.43264	ND	ND	ND	ND	ND	22.5863
SDW01204	leucoline	C9 H7 N	130.065	130.065	4.10213	14.3485	13.3603	27.1477	ND	ND	15.2913
SDW01220	Unknown	unknown	82.9981	82.9981	0.553106	26.2122	24.0212	26.8911	27.1085	26.7605	26.9205
SDW01222	Unknown	C38 H78 F2 N5 P S2	738.548	597.487	12.8157	22.8486	24.3334	22.9295	24.6699	26.4166	25.3575
SDW01225	2-(3,5-Dinitrophenyl)-5-[4-(2-methyl-2-propanyl)phenyl]-1,3,4-oxadiazole	C18 H16 N4 O5	369.117	207.065	6.4158	16.6169	ND	23.9323	13.5361	ND	ND
SDW01232	6-[(2E,6E)-7-(5-hydroxy-3-methyl-2-oxocyclopent-3-en-1-yl)-6-methylhepta-2,6-dien-2-yl]-3-methyl-5,6-dihydro-2H-pyran-2-one	C20 H26 O4	353.172	309.182	8.54316	ND	17.9524	ND	ND	ND	ND
SDW01240	9(11)-dehydroaxinysterol	C28 H40 O3	447.286	187.036	12.1074	16.8898	19.5939	20.4005	17.1243	16.734	17.2516
SDW01242	Unknown	C21 H37 F4 N4 O2 P3	547.213	188.07	2.51297	17.038	16.3781	20.2296	19.9543	16.9929	22.3678
SDW01246	NP-007909	C13 H20 O3	207.138	95.086	4.15027	18.0963	17.5136	18.9191	22.9583	19.7535	20.3829
SDW01247	Unknown	C10 H14 F N2 O5 P	293.069	98.9758	7.16596	13.9823	ND	17.6424	18.0718	ND	24.6582
SDW01249	S-methylglutathione	C11 H19 N3 O6 S	322.106	76.0222	0.869378	15.5322	14.2853	17.9385	22.8089	18.5272	ND
SDW01250	Unknown	C4 H11 F4 N4 O4 P	287.052	85.029	0.576141	17.69	15.3353	19.052	19.764	19.5119	19.8604
SDW01251	4,5,8-trihydroxy-5-(hydroxymethyl)-3-(3-methoxy-3-oxoprop-1-en-2-yl)-8a-methyl-decahydronaphthalen-2-yl 3,4-dihydroxy-2-methylidenebutanoate	C21 H32 O10	467.188	449.178	4.62936	ND	ND	ND	22.0219	14.295	ND
SDW01252	Guanine	C5 H5 N5 O	152.057	107.049	0.863325	17.0733	16.4586	18.7691	18.2901	17.6965	25.186
SDW01257	Dihomo-γ-linolenic acid ethyl ester	C22 H38 O2	341.304	57.0707	11.6837	21.6499	21.5886	21.6844	20.9886	21.0931	21.0446
SDW01264	2-(3,5-Dinitrophenyl)-5-[4-(2-methyl-2-propanyl)phenyl]-1,3,4-oxadiazole	C18 H16 N4 O5	369.117	207.065	6.02848	16.3161	25.4712	17.6969	ND	ND	ND
SDW01265	Unknown	C8 H2 Cl F N4 O14 S3	528.848	112.896	0.696095	15.5653	13.6465	14.7383	ND	ND	14.9498
SDW01266	Glucose 1-phosphate	C6 H13 O9 P	261.036	98.9846	0.576163	16.81	15.4779	16.4372	20.1194	19.9425	18.448
SDW01276	5-(2-Nitroprop-1-enyl)-1,3-benzodioxole	C10 H9 N O4	208.06	162.055	3.4277	ND	ND	26.0715	ND	ND	ND
SDW01277	Diosgenin	C27 H42 O3	397.31	253.195	10.5975	ND	ND	ND	ND	ND	18.9969
SDW01285	Levulinic acid	C5 H8 O3	117.055	98.9758	0.581377	22.3223	21.5462	20.3827	23.5074	23.6265	21.8188
SDW01295	tert-Butyl 2-tert-butyl-5-(2-hydroxyethyl)-3-methyl-4-oxo-1-imidazolidinecarboxylate	C15 H28 N2 O4	301.211	301.141	11.1172	26.3752	27.0751	26.6644	24.7047	21.9885	26.9445
SDW01296	Unknown	C18 H35 F3 N4 O2 S	429.252	313.205	11.2708	22.7566	21.7836	22.4679	21.4528	21.3084	21.2439
SDW01297	Unknown	C6 H N2 O2 P	164.984	119.019	0.873331	19.6102	21.878	23.8687	19.058	21.0172	22.2273
SDW01305	dimethyl itaconate	C7 H10 O4	159.065	98.9758	0.576954	23.1417	22.576	21.7923	24.1786	24.4534	22.7071
SDW01306	Hexadecanamide	C16 H33 N O	256.263	88.0762	11.133	19.3766	18.8316	18.7533	19.7142	19.497	19.6902
SDW01309	Methyl 4,6-dideoxy-4-[(2,4-dihydroxybutanoyl)amino]hexopyranoside	C11 H21 N O7	280.138	262.128	0.830083	22.6814	18.7514	22.1964	19.0726	24.2858	19.9526
SDW01315	Unknown	C8 H15 F2 N3 O3 S	272.087	110.072	0.743455	19.5306	17.2884	20.2837	19.9467	23.9864	23.1346
SDW01324	D-(+)-Maltose	C12 H22 O11	365.105	203.052	7.67247	14.5916	13.4416	19.755	17.7199	14.1595	19.1353
SDW01327	NP-005196	C15 H22 O5	265.143	111.044	5.23808	ND	ND	ND	22.1094	ND	19.3518
SDW01329	Unknown	C19 H29 F3 N2 O4	407.214	325.211	11.3927	23.3223	22.4407	22.3472	20.6123	21.3479	23.7025
SDW01330	Oleanolic acid	C30 H48 O3	439.356	203.179	11.3143	ND	13.5671	ND	ND	21.2354	ND
SDW01331	5-[(10Z)-14-(3,5-dihydroxyphenyl)tetradec-10-en-1-yl]benzene-1,3-diol	C26 H36 O4	413.266	301.141	11.7627	23.9923	23.1573	23.4072	23.2021	23.2946	23.0802
SDW01338	Unknown	C12 H6 Cl F N2 O3 S3	376.928	278.952	0.645621	23.0249	20.6298	25.0604	24.9766	20.8692	24.2832
SDW01339	Unknown	C35 H64 N6 O3	617.513	81.0704	12.7454	20.219	15.4185	20.8539	20.049	15.9558	18.8837
SDW01343	Indole-3-acetic acid	C10 H9 N O2	176.07	130.065	5.23079	17.8663	22.6548	23.9666	15.069	17.4167	ND
SDW01345	Unknown	C7 H15 F4 N7 O	290.134	58.0659	0.872719	19.978	19.8296	23.8736	22.8094	18.1992	16.9854
SDW01348	Acycloguanosine	C8 H11 N5 O3	226.093	152.057	1.57733	24.256	24.3371	24.3572	24.6261	25.2577	24.2208
SDW01349	2'-Deoxyadenosine	C10 H13 N5 O3	252.109	136.062	2.21972	24.8246	19.3774	23.7197	ND	15.0602	17.8488
SDW01353	Unknown	C38 H67 F3 N5 O2 P	714.505	573.487	12.6141	18.781	20.5656	21.8491	26.6752	25.4371	26.8045
SDW01355	Unknown	C7 H11 Cl F2 N2 O3	245.05	161.029	0.588943	16.1328	14.7404	17.2907	17.8839	17.3708	17.881
SDW01366	Unknown	C28 H37 F3 O	447.286	187.036	11.8249	19.4602	21.6024	22.4385	19.2685	19.3152	19.2389
SDW01378	Unknown	C23 H57 F2 N10 O8 P S	703.387	703.387	10.8494	24.7826	24.2025	28.9125	24.7527	18.773	24.8091
SDW01379	Unknown	C3 H Cl2 F N4	182.963	122.942	0.591097	19.5633	19.6457	21.1354	21.6627	21.3392	21.7625
SDW01380	Unknown	C22 H42 F N3 O7	480.308	339.289	11.0637	22.6018	24.5082	24.4437	21.9225	18.0304	22.9425
SDW01382	L-Pyroglutamic acid	C5 H7 N O3	130.05	130.05	5.21413	19.9002	24.2718	25.4512	16.4372	18.7325	17.1052
SDW01391	5,7-dihydroxy-2-(4-hydroxy-3-methoxyphenyl)-3,4-dihydro-2H-1-benzopyran-4-one	C16 H14 O6	303.086	153.018	5.41855	ND	ND	24.5164	13.9456	14.8696	16.8146
SDW01393	1728235	C19 H38 O4	331.284	57.0707	11.2807	20.7546	20.4501	20.6048	19.4763	19.3267	19.4386
SDW01394	Unknown	C5 H5 F O S2	164.984	119.019	0.887445	19.842	21.7795	23.9603	19.1898	21.1647	22.3054
SDW01398	Unknown	C9 H13 F2 O3 P	239.065	224.042	7.16115	ND	ND	17.0138	ND	ND	24.9696
SDW01406	Dibutyl itaconate	C13 H22 O4	243.159	57.0707	7.55073	ND	ND	ND	ND	ND	21.2387
SDW01411	Unknown	C22 H32 F N3 O4 P2 S	516.164	369.111	4.97899	ND	14.0697	18.6324	14.5188	ND	25.0103
SDW01412	(2E)-3-(4-methoxy-2-{[(2S,3R,4S,5S,6R)-3,4,5-trihydroxy-6-(hydroxymethyl)oxan-2-yl]oxy}phenyl)prop-2-enoic acid	C16 H20 O9	379.099	185.042	4.00943	ND	ND	20.5537	20.521	21.9271	24.4075
SDW01413	1-[(9Z)-hexadecenoyl]-sn-glycero-3-phosphocholine	C24 H48 N O7 P	494.324	184.073	10.395	19.6293	21.8825	23.2012	21.2054	17.3291	24.6246
SDW01417	1913256	C18 H30 O	263.236	104.993	11.3686	22.4187	23.2961	22.5984	19.7598	21.0257	21.4606
SDW01419	4-ETHOXYCARBONYLOXY-3,5-DIMETHOXYBENZOIC ACID	C12 H14 O7	271.081	81.0341	0.77312	17.6064	17.7809	16.6568	16.0937	18.7622	17.3017
SDW01421	Unknown	C23 H44 O9	487.287	104.107	10.355	ND	22.5341	ND	ND	ND	ND
SDW01423	Unknown	C26 H46 N7 O7 P	600.324	104.107	10.9456	24.5638	25.3184	23.4928	19.8397	19.5457	22.4413
SDW01425	(1E,4E)-1,5-bis(4-methoxyphenyl)penta-1,4-dien-3-one	C19 H18 O3	317.12	155.068	3.33067	20.9994	14.6732	22.7854	18.1701	18.5557	19.3986
SDW01427	Unknown	C10 H2 O	139.018	68.9978	0.831306	18.2973	16.8853	16.835	23.3899	18.9617	19.569
SDW01432	Unknown	C6 H4 Cl N4 O3 P S	278.951	98.9758	0.595943	21.306	20.3284	ND	22.4303	22.6936	21.6099
SDW01433	Unknown	unknown	139.531	98.9757	0.591804	21.0272	19.9346	18.9198	22.7014	22.6891	20.7517
SDW01434	Unknown	C17 H29 F3 N2 O4	383.214	301.211	11.5658	25.8718	25.3581	25.4217	25.4152	25.3629	25.7205
SDW01437	Guanosine	C10 H13 N5 O5	284.098	152.057	1.6568	25.4643	23.8238	25.8004	21.2257	21.8015	22.4345
SDW01441	Unknown	C4 H F O2	101.004	101.004	0.581272	25.0056	22.8816	25.5641	25.8304	25.5433	25.68
SDW01443	Unknown	C3 H8 F N2 O6 P	219.017	98.9758	0.59273	22.6135	21.3692	ND	23.5352	23.551	21.7677
SDW01456	Unknown	C19 H31 F3 N2 O4	409.23	327.227	11.656	24.2789	24.9058	24.7178	21.9204	21.051	23.1505
SDW01457	Unknown	C19 H33 N3 O6	400.244	110.072	4.68238	ND	ND	ND	ND	ND	22.865
SDW01458	γ-Linolenic acid ethyl ester	C20 H34 O2	313.273	57.0707	11.2774	23.6735	22.7943	23.3047	22.384	22.0403	22.321
SDW01459	NP-008882	C27 H48 O9	539.322	191.07	4.24452	24.1305	15.4981	14.9309	14.774	14.6158	14.3723
SDW01463	3134	C7 H11 N S	143.019	119.019	0.586053	23.9774	21.5487	24.7909	25.0949	24.8749	24.9949
SDW01464	γ-Linolenic acid ethyl ester	C20 H34 O2	313.273	57.0707	11.278	23.6288	22.8473	23.2105	22.2565	22.1818	22.3994
SDW01465	1-Isocyanohexane	C7 H13 N	112.112	84.0813	0.561179	22.7457	20.7955	23.5933	23.823	23.9598	24.239
SDW01466	NP-020705	C17 H24 O8	379.136	217.083	6.23485	ND	ND	13.5467	14.7545	16.4239	21.2884
SDW01472	Unknown	C29 H46 F4 N4 O3 P2	659.286	391.164	10.9187	21.2783	20.3533	21.0144	22.0254	22.1333	21.9363
SDW01475	Unknown	C19 H44 N7 O5 P	482.324	341.305	11.3939	20.0146	22.3669	21.43	15.7509	17.0623	20.0748
SDW01480	MFCD00006862	C12 H13 N O2	204.102	147.044	2.91416	ND	ND	25.5315	ND	ND	13.5731
SDW01481	Unknown	C20 H37 F N4 O11	529.251	198.974	11.791	21.0398	23.1653	24.0476	18.2471	17.7972	24.4025
SDW01485	Unknown	C14 H12 O3	229.086	107.049	5.16258	ND	ND	ND	14.2603	22.8538	13.3617
SDW01490	N,N'-Diheptyl-2-hydroxy-N,N'-dimethylmalonamide	C19 H38 N2 O3	365.277	126.053	9.37088	17.8705	19.4351	19.0953	19.7857	20.2835	20.0831
SDW01491	Unknown	C18 H34 F N O7	396.238	320.185	5.15415	ND	ND	ND	ND	ND	25.1596
SDW01502	Unknown	C21 H23 N2 P	335.166	335.166	11.8103	20.2533	19.3915	20.031	17.5728	17.8577	17.8187
SDW01506	Unknown	C24 H24 F2 N2 O3 S	459.154	330.111	0.909157	14.6075	14.1379	13.5605	15.1653	16.2317	25.3046
SDW01509	MFCD00037215	C8 H14 N2 O5	219.097	84.045	0.768998	18.2053	19.9761	21.2116	21.9373	19.8262	17.4678
SDW01511	Kojic-Acid	C6 H6 O4	143.034	143.034	1.61606	17.5865	16.0213	17.349	15.4264	16.5557	24.5091
SDW01512	Dodemorph	C18 H35 N O	282.279	282.279	11.2767	25.7722	25.5491	25.1555	25.6354	25.4571	25.5454
SDW01520	N-[9-(alpha-D-Ribofuranosyl)-9H-purin-6-yl]-L-aspartic acid	C14 H17 N5 O8	384.114	252.072	2.59533	22.2217	20.8055	25.3674	21.5289	20.7201	22.7935
SDW01521	Unknown	C4 H5 F N4 S	161.029	161.029	1.60636	15.9173	21.0048	16.7532	14.3786	14.1827	29.2517
SDW01522	Unknown	C29 H42 N2 O3	467.326	188.07	11.1838	23.6545	16.9014	17.0651	ND	ND	ND
SDW01524	Di-Î±-linolenin	C39 H64 O5	613.482	81.0705	12.3657	15.7855	14.7516	20.271	20.1213	18.2382	18.887
SDW01533	NP-020921	C15 H20 O8	346.149	85.0289	3.68008	14.9381	14.8283	20.4346	15.4749	16.3439	16.3497
SDW01535	Unknown	C25 H47 F2 N2 O3 P	515.318	104.107	10.9377	22.8539	23.8615	21.3283	13.552	ND	18.6078
SDW01541	Lauryldimethylamine oxide	C14 H31 N O	230.248	57.0707	8.55883	22.2256	22.1645	21.8361	22.3112	22.4626	22.432
SDW01547	Brilliant green	C27 H32 N2	385.271	175.045	10.7518	15.8454	18.7098	15.6791	16.951	16.2803	16.4194
SDW01550	7-Oxabicyclo[2.2.1]heptane-2,3-dicarboxylic acid	C8 H10 O5	204.086	138.055	0.758268	20.2233	22.9213	20.9607	16.4242	19.3175	14.9064
SDW01551	Unknown	C22 H37 F N4 O5	457.283	341.236	11.691	20.8671	19.883	20.2223	20.6274	20.8536	20.6578
SDW01554	Tosylmethyl Isocyanide-	C9 H9 N O2 S	196.043	153.024	2.25058	ND	ND	ND	ND	ND	23.6202
SDW01559	Unknown	C18 H34 F N O14	508.202	120.081	1.74877	15.5258	14.864	22.2909	21.5333	19.8581	21.5071
SDW01560	(+/-)12(13)-DiHOME	C18 H34 O4	297.242	71.0862	9.55631	18.4049	16.6166	14.2398	ND	ND	ND
SDW01569	C20 phytosphingosine	C20 H43 N O3	346.331	284.294	9.25198	19.5241	19.8399	20.2639	20.3151	19.9443	20.6322
SDW01573	Unknown	unknown	68.9978	69.0454	0.829221	23.342	23.6035	22.8914	25.4704	25.329	23.4631
SDW01574	TREPROSTINIL HEXADECYL ESTER	C39 H66 O5	615.498	81.0705	13.4655	19.9897	20.6707	18.3282	18.0491	18.1602	19.9024
SDW01585	Unknown	C29 H62 F N8 P	573.487	81.0706	12.6145	14.2895	15.7267	16.8216	21.4591	20.7015	21.7075
SDW01590	Unknown	C26 H48 F6 N O5 P	600.324	518.321	10.9379	24.7417	24.8339	23.673	20.5656	20.2061	23.0202
SDW01591	Unknown	C17 H37 F2 N9 O6	502.29	459.247	11.0589	22.7139	24.5089	24.01	22.005	18.2376	23.1103
SDW01593	NP-020705	C17 H24 O8	379.136	378.964	6.22871	15.7695	ND	14.4671	18.5111	20.1185	24.8758
SDW01596	Brilliant green	C27 H32 N2	385.271	175.045	10.7607	15.3144	18.494	15.376	16.8089	16.1332	15.9987
SDW01598	2-Acetyl-4-hydroxyphenyl beta-D-glucopyranoside	C14 H18 O8	332.133	85.029	2.41872	16.3912	14.0447	21.6279	19.5537	16.0629	ND
SDW01599	Unknown	C9 H8 Cl F N6 O3	303.04	261.03	0.5871	18.1078	16.5329	18.48	19.6185	19.6157	19.0528
SDW01605	1-Linoleoyl glycerol	C21 H38 O4	337.273	81.0705	13.4848	21.6576	22.9423	21.1101	18.5192	18.2746	20.5113
SDW01607	2-Oxobutyric acid	C4 H6 O3	103.039	85.0289	0.581563	23.1037	20.5878	23.815	24.0925	23.6459	23.8114
SDW01608	Linamarin	C10 H17 N O6	248.112	86.097	3.89257	18.0699	ND	18.2221	14.7152	19.7784	21.0538
SDW01613	GSK1614235 FREE BASE	C28 H45 N3 O7	537.303	203.052	10.4245	16.7717	17.1654	17.4367	17.9127	16.8937	19.674
SDW01614	N-Benzoylglutamic acid	C12 H13 N O5	252.086	120.081	3.99978	17.7574	15.0583	17.5617	17.5139	16.9469	22.4659
SDW01616	Cafestol	C20 H28 O3	317.208	60.0452	9.4117	18.4454	19.0004	19.9847	21.2356	21.6421	20.3632
SDW01618	Unknown	C21 H39 F2 N3 O3 S	452.276	311.258	10.5332	18.1304	19.6639	19.3018	21.4991	15.4106	21.392
SDW01619	alpha-ketoadipic acid	C6 H8 O5	161.044	119.019	0.576992	21.222	19.4931	21.9229	22.331	21.79	22.4063
SDW01628	Glutaric anhydride	C5 H6 O3	115.039	101.009	0.584534	24.8574	22.4286	25.7063	25.9592	25.7372	25.8638
SDW01631	Unknown	C13 H24 F N O6 S	342.139	85.0289	0.775906	17.8753	17.8584	17.5321	14.4981	15.6759	13.4135
SDW01634	L-Ethionine	C6 H13 N O2 S	164.074	102.055	0.674273	13.3753	14.9508	23.2298	25.3411	17.3062	22.5793
SDW01637	trans-3-Indoleacrylic acid	C11 H9 N O2	188.07	146.06	4.24185	20.8575	ND	20.1768	16.6939	24.2946	ND
SDW01638	2-(4-Methylphenyl)-1,3-thiazolidine-4-carboxylic acid	C11 H13 N O2 S	241.1	192.048	2.24698	ND	ND	ND	ND	ND	23.0845
SDW01639	Unknown	C4 H N O4 S	159.97	60.0816	0.867333	24.4648	ND	ND	ND	ND	ND
SDW01640	Unknown	C19 H27 F3 N2 O4	405.198	323.195	11.1219	25.5028	25.4041	25.6117	23.6402	20.5547	25.4482
SDW01641	2-[2-(Octylamino)ethoxy]ethanol	C12 H27 N O2	218.211	88.0762	5.5713	18.0475	18.3106	18.6653	18.6066	18.3682	18.9111
SDW01642	Unknown	C17 H27 F N4 O3	355.215	313.204	11.5583	22.0607	22.364	22.7446	20.8879	20.9218	21.4476
SDW01645	(2R)-2-Î²-GDIMBOA	C15 H19 N O10	396.089	185.042	4.2539	ND	ND	23.7993	14.1737	ND	16.5648
SDW01650	benzyl oleate	C25 H40 O2	373.309	123.044	11.7302	19.1374	ND	ND	17.758	ND	ND
SDW01659	4-Hydroxybenzoic acid	C7 H6 O3	139.039	95.0496	2.52996	ND	ND	19.4443	23.1916	19.0899	18.94
SDW01660	6-(2-chloroanilino)-4-oxo-2-(4-pyridyl)-3,4-dihydro-2H-1,3-thiazine-5-carbonitrile	C16 H11 Cl N4 O S	343.295	240.232	9.36278	21.4097	22.2033	22.2645	22.5722	22.8959	22.7109
SDW01663	Vitexin 2"-O-p-coumarate	C30 H26 O12	579.149	127.039	3.177	ND	ND	ND	16.8102	24.4575	14.0867
SDW01665	Desthiobiotin	C10 H18 N2 O3	215.139	215.016	0.829934	ND	ND	20.0554	23.9636	23.7779	19.4455
SDW01667	Dimethyl 5-{[ethoxy(oxo)acetyl]amino}isophthalate	C14 H15 N O7	310.091	177.054	4.01919	ND	16.1116	16.5657	ND	14.3475	24.1677
SDW01668	(-)-Epicatechin	C15 H14 O6	291.086	139.039	4.19963	ND	ND	ND	18.6661	23.5283	22.7092
SDW01669	Methoxyacetyl fentanyl	C22 H28 N2 O2	353.229	353.144	8.5458	ND	25.265	22.8393	17.5273	17.6943	20.1391
SDW01675	10,12-PENTACOSADIYNOIC ACID	C25 H42 O2	375.325	123.044	11.957	23.5881	ND	ND	18.2217	ND	ND
SDW01676	Unknown	C17 H16 F3 N5 O2	380.133	172.075	4.10682	ND	ND	25.5243	ND	ND	ND
SDW01677	Unknown	C10 H9 F N6 O S	281.063	98.9758	0.58656	17.8635	20.7656	17.34	17.9089	18.5963	16.4986
SDW01678	Unknown	C16 H32 F3 N O11	472.202	130.086	0.776602	16.6927	16.7668	19.823	16.7453	17.9293	21.9559
SDW01679	Norepinephrine	C8 H11 N O3	170.06	115.054	2.50207	27.4016	22.7166	25.4044	23.7575	22.6145	26.1929
SDW01680	2-fluoro-N-[[(4S,5S)-2-[(2S)-1-hydroxypropan-2-yl]-8-(3-methoxyprop-1-ynyl)-4-methyl-1,1-dioxo-4,5-dihydro-3H-6,1$l^{6},2-benzoxathiazocin-5-yl]methyl]-N-methylbenzamide	C26 H31 F N2 O6 S	519.197	188.07	2.48698	16.2643	14.5316	23.0645	19.7939	16.1066	16.8477
SDW01681	N-(4-tert-Butylbenzyl)-N-methyl-L-leucyl-O-benzyl-N-tert-butyl-L-tyrosinamide	C38 H53 N3 O3	601.424	221.153	11.5475	ND	13.5487	21.5621	18.6517	16.8009	13.2962
SDW01683	Unknown	C7 H3 N6 O P	219.017	71.4856	0.589659	15.0724	13.7796	ND	16.9146	16.7419	15.3855
SDW01690	Unknown	C3 H3 N2 O3 P S2	210.94	268.128	0.5563	ND	ND	ND	ND	ND	ND
SDW01693	Unknown	C35 H64 N6 O3	617.513	81.0705	12.7348	20.2197	15.5193	20.8965	20.0684	15.96	18.8804
SDW01695	Unknown	C H3 N2 O3 P S	154.968	154.968	0.873007	21.1849	ND	21.5306	22.9716	22.1268	23.7561
SDW01696	Unknown	C8 H2 Cl2 F3 N6 O14 P3	626.824	626.824	0.58545	26.5086	26.7846	23.5382	23.2769	22.8944	22.7118
SDW01697	1,9-Dihydroxy-2-(3-methyl-2-buten-1-yl)-6H-[1]benzofuro[3,2-c]chromen-3-yl hexopyranosiduronic acid	C26 H26 O11	515.154	177.054	7.17845	16.1764	18.6452	25.4056	ND	ND	19.1
SDW01701	Unknown	C20 H27 F3 N4 O4	467.188	305.135	3.915	ND	ND	13.5301	26.5762	ND	19.8309
SDW01706	2,6-Dimethyl-4,10-dioxatricyclo[5.2.1.0~2,6~]decane-3,5-dione	C10 H12 O4	197.081	151.039	3.91537	19.3123	15.1999	15.1925	13.3074	16.7447	23.7153
SDW01708	Unknown	C11 H15 F3 N4 O4	325.112	85.0289	0.769386	19.5724	19.6666	19.3301	20.5559	21.775	20.177
SDW01709	2287460	C23 H40 O2	349.31	57.0707	11.903	20.2761	16.0818	14.5683	13.8995	ND	ND
SDW01711	Monoolein	C21 H40 O4	357.299	69.0706	11.3616	19.4436	21.1335	21.1403	17.4427	ND	15.8897
SDW01716	Unknown	C19 H33 F3 N2 O4	411.245	329.242	11.9418	25.1955	25.9099	26.3966	24.9622	25.3184	25.0719
SDW01718	Hexylresorcinol	C12 H18 O2	195.138	81.0705	7.91111	ND	ND	13.8582	ND	ND	19.3038
SDW01719	Glutaric anhydride	C5 H6 O3	115.039	115.039	1.60221	14.2817	17.1499	16.1168	ND	15.2299	26.0066
SDW01721	4-Methylumbelliferyl-α-D-glucopyranoside	C16 H18 O8	339.107	177.054	4.50871	20.1668	24.7376	22.6313	14.3988	15.449	25.0149
SDW01735	4-chloro-5-morpholino-2-quinoxalin-2-ylpyridazin-3(2H)-one	C16 H14 Cl N5 O2	344.091	326.08	0.841128	19.9024	20.9201	23.3304	23.4202	24.4802	22.9866
SDW01737	N-[2-(4-Hydroxy-4-methyl-2-oxo-1-oxa-3-azaspiro[4.5]dec-3-yl)ethyl]-1-methyl-1H-pyrazole-5-carboxamide	C16 H24 N4 O4	337.186	207.065	4.3252	25.572	15.8066	ND	ND	15.8291	16.3048
SDW01741	Unknown	C26 H32 F5 N3 O	498.256	498.256	10.9317	26.0295	27.2731	26.4946	23.9565	22.8417	25.8808
SDW01745	Unknown	C21 H29 F2 N2 O3 P	449.177	287.125	5.13196	14.2303	15.3274	16.6871	26.572	22.4839	20.7725
SDW01749	Unknown	C11 H9 Cl N6 S2	325.01	301.01	0.575351	16.2009	13.4484	17.9187	18.3631	18.3097	18.8423
SDW01750	1-Oxo-2,3-dihydro-1H-phospholium	C4 H6 O P	101.009	82.9983	0.577053	25.7611	23.1661	26.3554	26.8564	26.3784	26.5691
SDW01755	α-Linolenic acid	C18 H30 O2	279.231	81.0704	11.1163	23.5175	24.4615	23.9706	22.1859	19.2861	24.73
SDW01761	Chrysin 5-xyloside	C20 H18 O8	387.107	387.107	5.2099	16.2702	19.765	15.1587	19.0408	18.1431	15.3268
SDW01763	2'-deoxymugineic acid	C12 H20 N2 O7	305.134	186.076	0.765701	19.9991	24.5492	20.3535	17.9473	19.8739	16.5691
SDW01769	benzyl oleate	C25 H40 O2	373.309	123.044	11.7309	19.0054	ND	ND	17.7064	ND	ND
SDW01782	Unknown	C26 H33 N7 O2	476.277	335.258	10.3272	20.1158	20.7491	21.3722	21.6653	20.3354	25.0997
SDW01783	trans-4-Hydroxy-L-proline	C5 H9 N O3	132.066	86.097	0.902654	26.7164	25.295	29.9042	26.3035	29.0247	30.3227
SDW01785	3,4,5-Trimethoxy-N-(6-methyl-2-pyridinyl)benzamide	C16 H18 N2 O4	303.133	140.07	0.846597	15.874	16.143	15.8573	15.5821	16.3846	24.16
SDW01786	2-Oxobutyric acid	C4 H6 O3	103.039	103.039	0.578728	22.7269	21.238	23.1075	23.8487	23.7457	23.2774
SDW01787	Unknown	C22 H33 F N4 O5	453.252	337.204	11.0758	21.5317	21.0971	21.5296	15.8386	14.742	17.6789
SDW01788	10,12-PENTACOSADIYNOIC ACID	C25 H42 O2	375.325	123.044	11.9553	23.6086	ND	ND	18.2507	ND	ND
SDW01789	Butafenacil	C20 H18 Cl F3 N2 O6	474.172	345.13	2.65645	22.5398	20.4572	18.2898	21.4621	16.5163	16.9265
SDW01792	Niacin	C6 H5 N O2	124.039	124.039	0.872438	26.2087	26.5685	26.4226	28.092	24.1003	23.7879
SDW01793	Unknown	C6 H19 N8 O6 P	331.124	331.124	0.855779	21.6848	21.722	24.6335	25.8427	23.6669	22.6539
SDW01800	Unknown	C18 H39 F N7 O6 P	500.274	120.966	10.7413	21.328	22.2576	21.4226	15.7552	17.428	19.1013
SDW01805	Unknown	C9 H13 Cl N2 O P2	263.027	263.027	0.65865	23.3172	20.8348	21.7857	22.9876	23.4397	22.4107
SDW01808	4-(2,3-dihydro-1,4-benzodioxin-6-yl)-1,2-diphenylbut-2-ene-1,4-dione	C24 H18 O4	393.115	349.126	5.27042	16.433	ND	16.6182	22.4193	15.7268	18.3258
SDW01811	Thiamine	C12 H16 N4 O S	265.111	122.071	0.710841	21.4715	22.5736	21.2445	19.5462	21.3278	17.5703
SDW01812	5'-O-beta-D-Glucosylpyridoxine	C14 H21 N O8	332.133	108.081	0.86605	23.756	24.5488	19.9019	22.4076	25.8707	22.3591
SDW01821	Picolinic acid	C6 H5 N O2	125.071	110.048	0.744927	16.9021	16.2268	16.3159	14.3973	16.1856	25.9869
SDW01824	3,5-Heptadiyn-2-one	C7 H6 O	107.049	79.0548	1.71065	22.2551	21.0131	25.5595	23.1188	24.864	24.206
SDW01826	Metsulfuron-methyl	C14 H15 N5 O6 S	382.082	382.082	0.940295	25.1524	26.679	29.1134	29.7041	28.9151	30.128
SDW01828	2030114	C40 H54 O	551.424	119.086	12.0639	15.5835	ND	19.6397	ND	15.384	16.587
SDW01829	Unknown	C24 H39 N6 O10 P	603.254	177.054	5.9814	ND	ND	25.5382	ND	ND	13.6898
SDW01832	Unknown	C18 H43 F6 N10 P	545.34	545.34	11.1882	23.751	23.7828	23.3586	23.98	24.1778	24.0166
SDW01837	Unknown	C4 H10 N8 O7	283.074	207.035	2.58889	ND	ND	ND	ND	ND	22.373
SDW01843	N-(4-tert-Butylbenzyl)-N-methyl-L-leucyl-O-benzyl-N-tert-butyl-L-tyrosinamide	C38 H53 N3 O3	601.424	221.153	11.546	13.3788	14.9165	22.3593	18.8076	16.7897	15.1147
SDW01845	MFCD01320384	C24 H49 N O3	400.378	60.0452	11.1411	16.5097	15.9548	16.3791	16.0549	15.8706	15.9815
SDW01846	Unknown	C21 H41 N2 O11 P	529.251	437.203	12.026	23.9707	25.9942	23.219	19.2383	18.6528	22.0312
SDW01847	Unknown	C40 H67 F O S	615.498	615.498	13.4213	29.7198	29.7656	28.6965	27.7864	27.5447	29.1402
SDW01868	11-piperidino-2,3-dihydro-1H-cyclopenta[4,5]pyrido[1,2-a]benzimidazole-4-carbonitrile	C20 H20 N4	317.178	56.9656	11.1173	21.0747	21.2549	21.4205	19.6824	16.7032	21.8134
SDW01869	1,9-Dihydroxy-2-(3-methyl-2-buten-1-yl)-6H-[1]benzofuro[3,2-c]chromen-3-yl hexopyranosiduronic acid	C26 H26 O11	515.154	177.054	7.17472	15.7039	18.8379	25.3173	ND	ND	19.3611
SDW01876	Unknown	C11 H18 F N2 O6 P	325.095	98.9758	7.16541	ND	ND	ND	ND	ND	18.5245
SDW01882	Unknown	C24 H48 F N3 O7	510.355	104.107	11.1758	20.9619	20.6115	19.2843	14.5516	15.7424	18.5137
SDW01883	C16 phytosphingosine	C16 H35 N O3	290.268	88.0762	8.66324	21.1891	22.8096	21.6654	22.0825	22.5571	23.0061
SDW01890	TREPROSTINIL HEXADECYL ESTER	C39 H66 O5	615.498	81.0705	12.5299	17.4421	16.5848	20.5494	17.3159	17.4728	19.3686
SDW01893	Unknown	C7 H11 F3 N4 O4	273.081	183.05	0.57437	16.4743	15.0184	17.1305	17.041	16.9418	17.1127
SDW01905	Unknown	C9 H17 F2 N O4 S	274.091	97.0289	0.800442	19.9747	17.1648	17.628	18.8588	21.182	17.6028
SDW01910	1-(4-(((3S,3'R,4'S,5'S,6'R)-3',4',5'-TRIHYDROXY-6'-(HYDROXYMETHYL)SPIRO(1H-ISOBENZOFURAN-3,2'-TETRAHYDROPYRAN)-5-YL)METHYL)PHENYL)ETHANONE	C22 H24 O7	401.159	330.109	5.63318	15.8857	ND	18.5586	19.7999	ND	15.1034
SDW01912	N-[9-(alpha-D-Ribofuranosyl)-9H-purin-6-yl]-L-aspartic acid	C14 H17 N5 O8	384.114	252.072	2.59043	22.3085	20.8995	25.4726	21.6376	20.8473	22.9061
SDW01915	1-(4-(((3S,3'R,4'S,5'S,6'R)-3',4',5'-TRIHYDROXY-6'-(HYDROXYMETHYL)SPIRO(1H-ISOBENZOFURAN-3,2'-TETRAHYDROPYRAN)-5-YL)METHYL)PHENYL)ETHANONE	C22 H24 O7	401.159	330.109	5.63218	15.8591	ND	18.8463	19.9723	ND	15.2251
SDW01916	Oglufanide	C16 H19 N3 O5	334.139	188.07	3.79208	24.7596	19.9756	22.1588	20.8334	19.3018	21.1049
SDW01918	Unknown	C24 H36 N4 S	413.274	175.045	11.2706	22.9859	21.9433	22.7541	22.0308	21.8727	21.79
SDW01919	1-{[(2R,3S,4R,5S)-3,4-Dihydroxy-5-{2-[(2R)-2-(methoxymethyl)-1-pyrrolidinyl]-2-oxoethyl}tetrahydro-2-furanyl]methyl}-3-(3-fluorophenyl)urea	C20 H28 F N3 O6	448.193	259.119	3.09065	20.0635	25.0543	22.4401	18.2988	19.7192	15.3284
SDW01926	Unknown	C2 H7 N O6	142.035	96.0812	0.841399	19.9633	21.219	19.4149	20.4416	20.5831	21.5194
SDW01933	[Similar to: 2-{2-[(2Z)-pent-2-en-1-yl]-3-{[3,4,5-trihydroxy-6-(hydroxymethyl)oxan-2-yl]oxy}cyclopentyl}acetic acid; ΔMass: -256.2222 Da]	unknown	118.979	101.009	0.579388	23.3743	21.2574	24.0356	24.7236	24.2601	24.5776
SDW01934	Unknown	C2 H7 N5 O4	166.058	137.06	0.813704	13.4041	ND	15.8662	ND	14.3466	21.8542
SDW01935	L-Glutathione (reduced)	C10 H17 N3 O6 S	308.09	76.0222	0.812824	23.5708	22.8104	26.7589	28.295	27.5949	17.0518
SDW01939	Unknown	C19 H33 F3 N2 O4	411.245	329.242	11.9371	25.1107	25.8744	26.3173	24.8805	25.2159	25.0245
SDW01947	NP-014517	C14 H18 O9	353.084	185.042	2.89878	13.5709	ND	20.3341	21.2696	22.1543	24.3187
SDW01949	N-{[(1S,4S,6S)-4-{2-[Benzyl(methyl)amino]-2-oxoethyl}-6-isopropyl-3-methyl-2-cyclohexen-1-yl]methyl}isonicotinamide	C27 H35 N3 O2	416.267	313.204	9.66443	16.5265	18.6117	ND	17.5609	16.2372	19.4953
SDW01957	Boc-Gly-OH	C7 H13 N O4	176.091	98.0605	0.73362	21.0943	19.1068	18.793	19.4289	20.9177	19.4104
SDW01959	1-(4-(((3S,3'R,4'S,5'S,6'R)-3',4',5'-TRIHYDROXY-6'-(HYDROXYMETHYL)SPIRO(1H-ISOBENZOFURAN-3,2'-TETRAHYDROPYRAN)-5-YL)METHYL)PHENYL)ETHANONE	C22 H24 O7	401.159	330.109	4.96541	ND	ND	20.184	15.8705	ND	15.2065
SDW01960	Unknown	C14 H22 F N2 O5 P S2	413.075	353.054	2.4456	14.7725	16.0308	22.6297	20.442	16.7963	14.1456
SDW01964	NP-020521	C18 H32 O3	279.231	81.0705	10.1544	22.9809	24.7169	18.7967	16.0415	18.016	23.0453
SDW01965	Unknown	C18 H25 N O12	448.144	124.039	2.69653	20.6892	23.6209	21.2507	23.9305	ND	ND
SDW01966	Diethyl (5Z,12Z)-3,3,10,10-tetramethyl-7,14-dioxo-1,8-dioxa-4,11-diazacyclotetradeca-5,12-diene-6,13-dicarboxylate	C20 H30 N2 O8	427.207	177.054	2.69339	ND	17.1197	25.4765	ND	ND	14.3661
SDW01967	1H-Inden-1-ylidene	C9 H6	132.081	86.097	0.901403	27.0335	25.6293	29.9842	26.5301	29.2061	30.4595
SDW01969	1-Aminocyclohexanecarboxylic Acid	C7 H13 N O2	144.102	144.102	0.742501	22.8043	27.6008	21.8054	21.7361	23.3941	20.3978
SDW01970	methyl 4-oxo-4H-benzo[4,5]imidazo[2,1-b][1,3]thiazine-2-carboxylate	C12 H8 N2 O3 S	261.028	98.9758	0.58134	18.1255	16.4076	16.9056	20.6391	20.6852	19.1494
SDW01977	Ethylenediamine-N,N'-diacetic-N,N'-dipropionic acid	C12 H20 N2 O8	321.128	158.081	0.760655	14.1127	13.3511	23.8643	15.217	17.1709	ND
SDW01984	bis-beta-D-fructofuranose 1,2':2,3'-dianhydride	C12 H20 O10	325.112	85.0289	0.765917	20.018	20.0573	19.3619	20.8095	21.9491	20.1918
SDW01987	Hypoglycin A	C7 H11 N O2	142.086	96.0812	0.83774	19.4871	21.2214	19.508	20.4494	20.6829	21.6046
SDW01992	Unknown	C17 H30 F N2 O4 P	377.199	317.178	11.1168	21.8025	21.9997	22.2511	20.2623	17.363	22.3297
SDW01996	Unknown	unknown	90.9482	65.0393	0.864915	18.4291	19.2383	22.202	18.0472	19.8564	22.9394
SDW02012	(5R)-3-[(1R)-1-Hydroxyoctyl]-5-methyl-2(5H)-furanone	C13 H22 O3	227.091	181.049	4.20874	19.5842	15.7978	16.694	14.7003	16.8117	24.0204
SDW02013	(2S,4R,5S,6S,7R)-5,6,12,14-tetrahydroxy-4-(hydroxymethyl)-13-methoxy-3,8-dioxatricyclo[8.4.0.0Â?,â·]tetradeca-1(14),10,12-trien-9-one	C14 H16 O9	351.068	70.0658	0.820678	15.099	13.7069	15.7116	19.1639	19.3244	16.3646
SDW02020	12a-Hydroxypachyrrhizone	C20 H14 O8	383.077	383.077	0.731101	24.8978	26.2669	28.8744	29.4178	28.5979	29.8298
SDW02024	Unknown	C24 H47 N O8	478.337	60.0452	9.20974	14.0766	ND	13.3068	19.5415	17.1359	ND
SDW02026	Unknown	C10 H2 O	139.018	121.029	0.85046	20.0486	21.0268	22.6703	22.3715	21.7546	21.4585
SDW02029	Unknown	C4 H7 F3 O2 P2	206.995	119.019	0.578354	16.7138	15.5383	17.1811	17.4769	17.1096	17.4534
SDW02032	Unknown	C26 H49 F O4	445.367	139.075	12.1395	15.7978	15.0319	13.4733	15.6791	13.9603	17.6361
SDW02040	Unknown	C18 H39 N O4	334.295	88.0762	8.66325	17.7478	19.7	19.0957	18.3067	18.3944	19.9743
SDW02046	Diethyl acetamidomalonate	C9 H15 N O5	218.102	172.097	0.791622	19.9358	20.5725	19.9101	21.5566	20.2325	17.2648
SDW02047	Unknown	C16 H26 F3 N3 O4 P2	444.143	137.06	3.57352	14.3124	ND	ND	ND	ND	22.2845
SDW02051	Di-Î±-linolenin	C39 H64 O5	613.482	67.055	12.359	15.0775	14.4639	19.7782	19.6115	17.6866	18.3041
SDW02052	(4alpha,5alpha,12R)-3-Hydroxy-12,13-epoxytrichothecane-4,15-diyl diacetate	C19 H28 O7	369.117	207.065	3.94722	17.8164	23.621	23.6838	13.6469	ND	15.5661
SDW02054	L(+)-Ornithine	C5 H12 N2 O2	133.097	70.0659	0.613064	ND	19.2573	17.4108	ND	23.4877	ND
SDW02057	1,4,7-Heptanetriamine	C7 H19 N3	146.165	146.06	4.10262	17.0518	19.0749	25.9961	16.029	15.3799	18.0489
SDW02067	Unknown	C3 H9 F2 N2 O3 P	191.039	98.9758	0.57931	20.0679	19.4994	15.3701	21.6394	21.4115	19.1483
SDW02072	Unknown	C36 H66 N2 O9	671.485	335.219	11.9116	22.0888	19.4586	19.5436	14.9597	16.7591	18.1248
SDW02077	1-Methylguanine	C6 H7 N5 O	166.072	120.081	1.70566	25.9768	24.8486	29.2216	26.9086	28.6063	28.0001
SDW02088	3,4,5-Trimethoxy-N-[2-(3-methoxyphenoxy)ethyl]benzamide	C19 H23 N O6	362.159	192.078	4.09771	ND	ND	ND	ND	ND	22.8836
SDW02095	Unknown	C30 H51 F5 N4 O2 P2	657.349	147.044	2.97765	ND	ND	25.8448	16.2387	14.7539	13.6509
SDW02096	Thymine	C5 H6 N2 O2	127.05	110.024	2.05046	22.727	17.6639	21.9016	ND	16.6539	16.9427
SDW02097	Glimepiride	C24 H34 N4 O5 S	491.233	327.226	11.6768	26.0027	26.2961	25.2877	24.3375	23.7406	25.4674
SDW02102	Unknown	C11 H27 F N6	263.236	263.236	11.3481	26.6115	27.7225	26.802	24.8957	24.5172	25.5216
SDW02104	Unknown	C20 H43 N7 O6	478.337	60.0452	9.20722	14.1353	13.3536	13.587	19.6316	17.1651	13.4745
SDW02105	Unknown	C18 H37 F3 N2 O6	435.269	104.993	11.2645	20.4595	19.8219	20.1375	19.3378	18.963	18.8864
SDW02108	Unknown	C5 H8 F N4 O P S	223.021	163.018	0.571844	16.4261	16.3308	18.5781	18.2679	17.2017	17.6698
SDW02110	Unknown	C15 H25 N O7 S	364.142	122.027	3.78647	ND	ND	ND	23.6883	ND	ND
SDW02118	(2R,3S,4S,5R,6S)-2-(hydroxymethyl)-6-{4-[(1E)-3-hydroxyprop-1-en-1-yl]-2,6-dimethoxyphenoxy}oxane-3,4,5-triol	C17 H24 O9	395.131	232.07	3.7921	13.3863	ND	21.1298	22.6667	20.9554	19.1691
SDW02119	Unknown	C6 H16 N9 O P	262.128	216.123	0.827722	22.2869	19.9864	21.4802	19.3534	23.545	20.3799
SDW02121	Loprazolam	C23 H21 Cl N6 O3	465.137	421.146	6.34545	ND	ND	ND	20.2661	14.4351	22.4133
SDW02127	Unknown	C17 H27 F4 N7 O2 P2	500.169	161.06	4.97781	ND	16.4706	21.0075	17.2047	15.2699	27.7334
SDW02128	Unknown	C26 H43 F3 O2	467.312	325.211	11.4173	21.8711	21.5564	21.4744	18.2313	19.4494	21.3062
SDW02135	Stearyldiethanolamine	C22 H47 N O2	358.367	88.0762	10.3226	18.6332	19.1618	17.7306	18.1005	18.2366	18.7069
SDW02136	Unknown	C10 H2 O	139.018	121.029	0.861191	19.8896	21.0786	22.6799	21.8513	21.6466	21.4694
SDW02146	1-(9Z-hexadecenoyl)-2-(9Z,12Z-octadecadienoyl)-sn-glycerol	C37 H66 O5	591.497	313.273	13.7306	20.3125	20.3916	20.002	19.961	20.7388	20.5472
SDW02154	Unknown	unknown	89.0603	72.0815	0.590309	17.6592	17.3518	22.1748	18.6746	17.5595	21.996
SDW02162	Unknown	C3 H2 O3 S	118.979	101.009	0.583139	23.3807	22.092	24.356	24.3939	24.2331	24.6322
SDW02165	Dimethyl 5-(2-quinolinyl)-1,2,4-triazine-3,6-dicarboxylate	C16 H12 N4 O4	325.139	191.081	4.65575	21.1943	23.317	22.6466	17.6988	23.7683	23.664
SDW02171	Unknown	C22 H37 N2 O6 P S	489.217	325.211	11.4499	26.1113	25.8942	25.7254	22.6734	23.5659	25.5937
SDW02175	Thiram	C6 H12 N2 S4	240.995	198.985	0.586306	17.4839	15.6469	16.5171	19.8565	19.5934	18.4339
SDW02180	Unknown	C22 H45 F3 N O5 P	492.308	184.073	10.0224	15.7469	18.2339	16.9315	15.1592	ND	23.6374
SDW02181	S-beta-D-glucosyl-L-cysteine	C9 H17 N O7 S	284.079	100.022	0.762206	ND	14.6772	17.1548	15.6252	21.5219	18.6464
SDW02183	Ferulic acid	C10 H10 O4	195.065	177.054	4.00091	16.015	13.7605	19.3396	19.3847	20.3747	23.1746
SDW02184	NP-014287	C18 H32 O3	319.224	60.0452	9.67498	21.5781	23.7595	20.5716	22.8631	21.5168	24.7645
SDW02185	Unknown	C10 H9 N4 O3 P	265.05	163.018	0.585454	18.4293	16.8308	19.4026	19.4504	19.4448	19.6081
SDW02190	(4aR,5R,6S)-5-ethenyl-4a-hydroxy-6-{[(2S,3R,4S,5S,6R)-3,4,5-trihydroxy-6-(hydroxymethyl)oxan-2-yl]oxy}-1H,3H,4H,4aH,5H,6H-pyrano[3,4-c]pyran-1-one	C16 H22 O10	357.117	177.055	4.52172	ND	22.2134	17.4073	ND	ND	20.635
SDW02195	Unknown	C22 H32 N10	437.287	437.287	10.923	24.7947	25.0952	24.1022	20.8138	20.6949	23.2386
SDW02199	Unknown	C12 H22 N4 O6	319.161	70.0658	0.871256	16.0885	15.4677	16.72	20.1546	23.5564	17.0931
SDW02200	γ-Linolenic acid ethyl ester	C20 H34 O2	313.273	57.0707	13.4657	21.5119	21.8027	20.0024	18.2644	18.0411	20.2935
SDW02203	Unknown	C28 H57 F5 N6 O2	627.433	325.211	11.3729	27.6194	28.0552	27.6178	18.4508	20.2265	25.2947
SDW02206	Unknown	C40 H74 F2 N3 O3 P	736.533	482.308	12.277	23.3476	18.6658	22.9237	24.4461	24.7542	15.3238
SDW02208	Anisole	C7 H8 O	109.029	81.0341	0.757458	21.445	21.4217	21.2525	22.6223	23.3472	23.3121
SDW02209	(6-{[3,4-dihydroxy-2,5-bis(hydroxymethyl)oxolan-2-yl]oxy}-3,4,5-trihydroxyoxan-2-yl)methyl (2E)-3-(4-hydroxy-3-methoxyphenyl)prop-2-enoate	C22 H30 O14	541.152	379.099	4.52147	18.4952	27.3331	22.2909	13.4117	16.1371	25.7173
SDW02210	Unknown	C18 H29 N2 O2 P	337.204	323.224	11.6462	18.9053	20.0528	19.6456	15.6999	14.7436	17.2606
SDW02211	Unknown	C21 H40 F N9 O5	518.321	104.107	10.9375	27.27	27.9319	26.7883	22.3665	22.268	25.1035
SDW02214	Unknown	C19 H34 F3 P S	383.214	301.211	11.567	25.7659	25.3186	25.425	25.3736	25.3659	25.7328
SDW02220	4-Methoxybenzaldehyde	C8 H8 O2	137.06	122.036	2.84643	19.1972	17.1435	17.8798	14.3335	ND	22.6717
SDW02222	Unknown	C10 H13 F2 N2 O P	247.081	186.928	0.588413	18.0226	20.3562	19.4737	19.0052	18.8633	18.2767
SDW02223	Unknown	C45 H67 F O	643.526	341.185	11.3688	21.7757	22.2077	21.764	13.7615	14.7331	19.5453
SDW02228	Unknown	unknown	124.048	124.048	0.872661	26.0951	25.9955	26.3344	27.746	24.324	23.6709
SDW02229	2,3,4,6-Tetra-O-acetyl-N-(1-piperidinylcarbonothioyl)hexopyranosylamine	C20 H30 N2 O9 S	475.176	133.061	0.75003	20.2353	19.5664	20.3305	16.7632	13.4454	ND
SDW02230	Unknown	C22 H35 F N4 O5	455.267	339.22	11.2923	18.9424	20.8622	20.3749	18.8427	13.7542	16.704
SDW02232	e-Tokoferol	C28 H42 O2	411.325	151.075	12.1132	22.0099	20.3815	22.0239	13.9242	15.3233	14.6423
SDW02236	(3R,4R)-4-[(3,4-dimethoxyphenyl)methyl]-3-[(4-hydroxy-3-methoxyphenyl)methyl]oxolan-2-one	C21 H24 O6	411.125	177.055	4.00366	14.8737	ND	16.8559	16.4669	17.1965	19.9414
SDW02238	Unknown	C11 H22 F4 N4 O3	335.171	70.0658	4.72957	23.1169	ND	ND	ND	ND	ND
SDW02250	Unknown	C15 H25 F4 N5 O4 S	448.165	106.05	0.76166	17.1264	18.7344	21.3352	21.2327	18.9585	20.7168
SDW02251	1,1'-(Octylimino)dipropan-2-ol	C14 H31 N O2	246.242	88.0762	7.31314	17.9866	19.2905	19.0009	19.564	19.4684	19.8286
SDW02252	1,1'-(Octylimino)dipropan-2-ol	C14 H31 N O2	246.242	88.0762	7.31192	18.0149	19.2631	19.0102	19.5033	19.4457	19.7794
SDW02259	Unknown	unknown	119.083	119.019	0.717781	28.364	23.0042	ND	ND	ND	ND
SDW02270	Ethyl 3-oxo-2-piperazineacetate	C8 H14 N2 O3	187.108	82.0657	0.748092	20.7046	21.7967	20.9287	17.2291	18.5075	17.4968
SDW02278	Unknown	C31 H64 N5 O6 P3	696.415	263.237	10.6165	20.0151	15.7806	17.0871	ND	ND	14.2714
SDW02282	Unknown	C14 H19 F2 N O4 S	336.107	146.06	3.74399	16.6559	14.7689	23.7941	ND	ND	ND
SDW02288	Unknown	C23 H39 F3 O	411.286	411.286	11.7454	19.0747	16.0805	19.5874	17.8123	ND	18.8694
SDW02289	Unknown	unknown	91.0547	91.0547	1.69545	20.8942	18.27	24.0666	21.8392	23.3376	22.6969
SDW02292	OB4520000	C10 H9 N O	160.076	160.076	2.49402	26.1149	21.8519	24.3115	22.8856	21.6142	24.8907
SDW02298	N-[(4R,7S,8R)-5-benzoyl-8-methoxy-4,7,10-trimethyl-11-oxo-2-oxa-5,10-diazabicyclo[10.4.0]hexadeca-1(12),13,15-trien-14-yl]acetamide	C26 H33 N3 O5	468.249	177.054	5.40112	15.5987	ND	22.0393	ND	ND	ND
SDW02301	2-Indolylformic acid	C9 H7 N O2	162.055	162.055	1.61797	15.8122	16.7664	23.1275	15.2481	15.312	26.8969
SDW02303	Unknown	C6 H5 P	109.02	81.0341	0.754943	21.4662	21.4735	21.3832	22.5254	23.2809	23.2124
SDW02306	4-ETHOXYCARBONYLOXY-3,5-DIMETHOXYBENZOIC ACID	C12 H14 O7	271.081	81.0341	0.754224	17.6751	17.3609	16.8716	16.4105	18.9146	17.4115
SDW02307	Unknown	C27 H41 F N2 O P2 S	523.245	523.245	10.7183	24.4801	24.2795	23.8566	25.6766	26.2225	26.1863
SDW02313	Piracetam	C6 H10 N2 O2	143.081	119.019	0.574898	23.659	21.1796	24.5948	24.8969	24.8048	25.0208
SDW02321	2030114	C40 H54 O	551.424	119.086	12.0758	15.7432	ND	19.6563	ND	15.3754	16.4751
SDW02325	Unknown	C9 H20 Fe N2 O5	291.084	291.084	0.790217	22.0977	21.9335	24.746	26.3376	29.3061	23.7902
SDW02326	Unknown	C12 H23 N7 O S2	346.149	346.149	4.30954	14.3962	15.5486	ND	15.5596	16.0362	19.4391
SDW02327	Didecyl malonate	C23 H44 O4	407.313	407.313	12.0837	19.0449	19.7694	24.8713	19.4743	20.5048	20.2166
SDW02330	Unknown	C16 H26 O S5	395.066	395.066	0.739783	21.2987	21.4451	24.412	23.5456	22.417	21.9972
SDW02333	5-Hydroxyindole-3-acetic acid	C10 H9 N O3	192.065	146.06	4.11691	15.8248	17.5968	24.7221	ND	13.7171	17.8978
SDW02334	N-(4-Acetamido-1,2,5-oxadiazol-3-yl)-1-adamantanecarboxamide	C15 H20 N4 O3	305.16	70.0659	4.5806	23.5671	ND	ND	ND	ND	ND
SDW02344	Unknown	C36 H63 N O3	580.469	562.51	12.4378	19.7631	21.13	19.8756	ND	ND	14.1465
SDW02361	Unknown	C13 H26 F N O4 S	312.165	86.097	0.912287	14.4656	14.1944	19.2723	18.7511	23.0791	21.4407
SDW02374	Unknown	C36 H66 N2 O8	655.49	319.224	13.2231	22.0583	22.5505	21.4861	15.0407	17.3537	17.9806
SDW02377	Unknown	C4 H6 N4 O2 S	175.028	119.019	0.578305	21.1614	18.6715	22.211	22.7132	22.4163	22.5382
SDW02378	1a-Methoxy-6a-(methoxymethyl)-1a,1b,5,5a,6,6a-hexahydrooxireno[3,4]cyclopenta[1,2-c]pyran-5-yl 2,3,4,6-tetra-O-methylhexopyranoside	C21 H34 O10	469.204	333.078	6.94216	ND	ND	ND	20.9059	ND	ND
SDW02379	Unknown	C15 H39 F N8 O8	479.295	479.295	10.914	21.8832	23.298	22.2492	17.2164	17.6525	18.8897
SDW02382	Unknown	C19 H41 N O3	332.315	60.0452	9.94201	14.8874	17.9961	ND	16.7333	16.3137	18.9849
SDW02388	Unknown	C6 H13 Cl F2 N2 O3	235.066	119.019	0.576444	16.8599	14.7803	17.7123	18.0669	17.9631	17.7674
SDW02396	VS1150000	C18 H34 O4	337.234	337.234	9.22465	21.179	22.0735	20.9663	21.509	21.7146	21.6287
SDW02401	Unknown	C29 H32 F N6 O7 P	644.239	85.029	2.06707	22.2755	ND	ND	ND	ND	ND
SDW02410	Unknown	C23 H50 F N3 O9 P2	594.307	104.107	10.9355	23.7888	24.123	22.6908	19.0273	19.0442	21.7794
SDW02411	Unknown	C13 H18 F N2 O2 P3 S2	411.009	151.075	12.1106	21.268	19.7507	21.295	13.6327	14.5825	14.0839
SDW02413	Unknown	C20 H31 N5 O7	454.228	159.101	7.5495	ND	ND	ND	ND	ND	21.3447
SDW02414	LSD-d3	C20 H22 [2]H3 N3 O	327.22	313.204	11.5617	20.7637	21.2433	21.4957	19.6927	19.8479	20.3977
SDW02420	Unknown	C18 H34 F N O9 P2	490.176	148.06	0.754358	19.0633	20.1046	22.0962	22.4896	20.5251	19.5217
SDW02424	Unknown	C25 H51 F2 N7 O4	552.402	104.107	11.7597	17.9925	21.7683	19.4356	ND	15.8837	18.8962
SDW02428	Unknown	C12 H25 N3 O3 P2 S	392.073	130.065	3.39744	ND	13.3253	21.392	ND	ND	ND
SDW02429	Unknown	C30 H42 F5 N2 O P	595.285	415.221	11.8873	21.8155	21.5462	20.2175	17.4412	17.6236	22.1741
SDW02430	Unknown	C17 H30 F2 N2 O3 P2 S	443.148	161.06	5.01868	ND	ND	17.6321	15.7017	14.5845	22.3266
SDW02434	Bisoprolol	C18 H31 N O4	326.232	86.097	7.83109	ND	ND	21.4714	ND	ND	ND
SDW02436	Metoxuron	C10 H13 Cl N2 O2	229.073	229.073	1.19669	25.9395	22.6639	24.162	24.3414	22.793	22.8984
SDW02444	6-methyl-8-{[5-(2-naphthyl)-1,3,4-oxadiazol-2-yl]methoxy}[1,2,4]triazolo[4,3-b]pyridazine	C19 H14 N6 O2	359.13	197.078	2.21024	14.3719	ND	ND	22.1847	16.6858	14.3999
SDW02445	Unknown	C15 H16 F4 N7 O4 P	466.101	98.9757	4.25599	18.0442	ND	16.6265	14.729	20.7335	ND
SDW02450	Unknown	C5 H F O	97.008	69.0342	0.759617	22.1063	22.2303	21.7321	21.1914	24.0423	21.9732
SDW02456	LSD-d3	C20 H22 [2]H3 N3 O	327.226	313.204	11.561	20.3991	21.0093	21.1372	19.2571	19.3697	19.9478
SDW02461	Scutellarein 7,4'-dimethyl ether 6-sophoroside	C29 H34 O16	639.191	331.081	6.32925	24.3724	26.0058	ND	13.4262	15.9191	16.8447
SDW02463	NP-008952	C12 H20 O4	211.133	81.0341	6.33346	ND	ND	ND	ND	ND	18.5023
SDW02473	Unknown	C34 H16 N6 O S	557.118	557.118	0.786906	19.9663	20.1383	23.426	23.6112	22.1793	21.9766
SDW02478	Palmitoyl Serinol	C19 H39 N O3	330.299	74.0607	10.2347	18.8744	20.0579	19.6199	16.4815	14.7823	19.2077
SDW02489	Boc-Gly-OH	C7 H13 N O4	176.091	71.0692	0.704532	19.8657	19.3502	20.9861	25.7559	26.6281	23.2902
SDW02491	Bisoprolol	C18 H31 N O4	326.232	86.097	7.83137	ND	ND	21.5006	ND	ND	ND
SDW02492	Unknown	C4 H F O2	101.004	82.9983	0.572236	25.5448	23.1246	26.4613	26.8101	26.5693	26.8162
SDW02494	PALMITAMIDOHEXADECANEDIOL	C32 H65 N O3	512.503	283.263	11.2596	21.6176	22.8971	20.6926	22.1537	22.4661	22.9202
SDW02498	S-Adenosylmethionine	C15 H22 N6 O5 S	399.144	136.062	0.73097	ND	ND	22.4155	21.0976	22.4741	19.3443
SDW02503	Unknown	C4 H4 Cl F4 N2 O2 P3	316.92	136.94	0.640217	23.9934	24.4916	20.3034	20.3259	18.1841	17.5885
SDW02512	Unknown	C13 H14 F N O3 S	284.076	151.039	2.71937	17.0114	14.4087	20.1058	14.1117	ND	23.8689
SDW02519	Unknown	C H2 F2 N2	81.026	81.0176	0.821634	25.6578	25.9202	24.041	24.7022	25.1741	23.7008
SDW02521	Unknown	C33 H63 F N8 O S2	693.445	595.469	12.6152	ND	15.122	15.5434	21.1241	20.0906	21.0431
SDW02523	MHPG	C9 H12 O4	185.081	153.054	4.01258	19.7176	ND	18.1149	14.0912	ND	ND
SDW02530	Unknown	C5 H3 N3 O2	138.03	138.03	0.727826	21.7318	23.4838	23.907	23.0419	25.0205	23.9008
SDW02539	MFCD02068535	C12 H13 N O7	284.076	151.039	2.71543	16.8974	14.5021	20.0951	14.9669	13.3183	23.8622
SDW02540	Bis(2-methyl-2-propanyl) 2-benzyl-N-formylaspartate	C20 H29 N O5	364.211	137.06	7.149	ND	ND	ND	ND	ND	21.8902
SDW02545	6-Hydroxyluteolin 7-sophoroside	C27 H30 O17	627.155	319.044	5.56996	ND	ND	ND	ND	ND	23.7659
SDW02548	FL2F3GGS0001_a	C17 H16 O7	333.096	153.018	5.36319	ND	ND	23.618	ND	ND	ND
SDW02549	Unknown	C18 H32 N4 O S	353.236	339.22	11.6424	19.002	20.439	19.7091	15.9337	15.093	17.5454
SDW02563	3-Amino-7-methyl-4H,6H-[1,2,4]triazino[4,3-e][1,2,5]thiadiazin-6-one	C6 H7 N5 O S	198.043	98.9758	1.96496	16.0062	18.9706	18.1205	ND	ND	18.0723
SDW02565	Vasicinone	C11 H10 N2 O2	203.081	157.076	1.32764	22.5452	21.3062	21.066	24.2881	21.1292	21.49
SDW02571	Unknown	C15 H39 F N8 O8	479.295	479.295	10.9139	21.958	22.6637	ND	18.3721	18.843	18.1761
SDW02574	Unknown	C16 H19 N9 O3 S2	450.111	344.097	4.24467	17.0992	ND	15.2615	ND	19.9812	ND
SDW02580	Unknown	C25 H29 F N2 O6 S	505.181	188.07	2.51408	16.3226	ND	16.3305	21.9817	17.7204	20.1101
SDW02584	2,2,5,5-Tetramethyl-8a-pentyltetrahydro-3bH-[1,3]dioxolo[4,5]furo[3,2-d][1,3]dioxine	C16 H28 O5	301.201	301.141	11.1214	26.3327	27.0325	26.5939	24.7111	21.9883	26.8834
SDW02588	Unknown	C27 H43 F5 N2 O5 P2	633.265	177.054	5.53896	ND	ND	24.6703	ND	ND	ND
SDW02594	Suxibuzone	C24 H26 N2 O6	439.186	323.091	5.07685	13.4375	14.5497	22.9742	ND	ND	ND
SDW02603	Unknown	C9 H11 N2 O3 P S2	291.002	70.0658	0.749139	17.9183	16.818	21.3834	22.9297	26.6335	20.718
SDW02608	Unknown	C17 H42 F3 N10 O2 P	507.324	507.272	10.7073	25.6809	25.5356	26.1255	27.7801	28.0235	28.0911
SDW02614	Unknown	C18 H39 N O4	334.294	88.0762	8.67567	17.7339	19.4727	19.1333	18.3609	18.3138	19.9855
SDW02620	Unknown	C10 H14 F5 N6 P	345.101	345.101	0.865883	22.1027	22.2079	23.8725	22.817	24.1326	22.9406
SDW02623	3,9-Divinyl-2,4,8,10-tetraoxaspiro[5.5]undecane	C11 H16 O4	213.112	167.07	4.67407	ND	ND	17.0872	16.5272	ND	20.7824
SDW02626	Unknown	C33 H62 F4 N4 O	629.475	317.209	13.2117	17.2273	16.7195	15.4139	19.2758	17.5633	20.791
SDW02628	3-[2-Hydroxy-3-(4-morpholinyl)propyl]-5,5-dimethyl-2,4-imidazolidinedione	C12 H21 N3 O4	272.16	110.072	0.744061	19.6707	17.3464	20.4816	20.819	24.3509	24.4822
SDW02630	Butylparaben	C11 H14 O3	195.101	154.062	7.1701	ND	ND	18.336	ND	ND	26.0235
SDW02636	Unknown	C17 H39 N4 O2 P	363.289	123.044	10.6561	ND	ND	ND	15.6005	ND	ND
SDW02638	Unknown	C34 H67 F O5	575.503	81.0705	13.4472	20.9975	21.1898	19.8771	18.5868	17.6806	19.8085
SDW02640	L-Aspartic acid	C4 H7 N O4	134.045	74.0243	0.760525	22.3392	22.013	23.2632	23.8735	22.1984	21.5427
SDW02645	Unknown	C18 H39 F N6 O3	407.313	325.211	11.3981	23.3556	22.8773	22.662	20.8175	21.7578	24.0922
SDW02650	Unknown	C8 H13 F2 N3 O8 S2	382.018	382.018	0.74381	24.8837	26.565	29.1304	29.8282	28.8883	30.2821
SDW02658	Unknown	unknown	104.52	104.107	0.691875	22.3985	22.9236	23.8835	20.7229	21.5172	21.6636
SDW02663	Unknown	C11 H17 N7 O2 S2	344.097	344.097	0.871536	19.8529	20.6862	23.129	23.3527	24.3209	22.6927
SDW02673	Indole-3-acetyl-L-aspartic acid	C14 H14 N2 O5	291.097	130.065	3.03565	ND	14.5097	ND	18.8567	ND	23.3072
SDW02676	Adenine	C5 H5 N5	136.062	136.022	3.77983	22.3994	19.8135	25.087	24.1711	22.6788	23.0603
SDW02679	Unknown	C16 H13 F N4 O8	409.079	323.08	5.26789	16.6326	ND	16.6086	22.2485	15.6012	17.9278
SDW02682	1,6-Nonadiene-3,8-diyn-5-one	C9 H6 O	131.049	103.055	4.49955	16.2799	14.3293	20.5457	19.9678	16.5236	23.3897
SDW02688	Υ-Glutamylcysteine	C8 H14 N2 O5 S	251.069	84.0449	0.788964	20.302	19.0625	19.0115	20.1247	20.1796	ND
SDW02690	Unknown	C34 H74 N5 O7 P	696.54	262.253	12.2687	23.2814	18.6212	24.3272	24.2345	24.2753	15.5017
SDW02692	Unknown	C27 H46 F4 N O3 P S	572.293	104.107	10.3508	18.7273	23.9828	ND	15.2864	14.7017	16.7473
SDW02698	Unknown	C25 H44 N4 S4	529.251	529.251	12.2827	25.6267	26.2839	24.556	25.2308	26.1259	25.2165
SDW02707	Unknown	C19 H42 F4 N5 O2 P	480.308	339.289	11.0516	22.2357	23.8235	23.9719	21.177	17.6186	22.0869
SDW02710	Unknown	C19 H32 F3 P S	381.198	299.195	11.2115	22.6672	23.4607	23.4648	22.9824	22.0039	23.9221
SDW02717	10-[(acetyloxy)methyl]-6-formyl-3-methylidene-2-oxo-2H,3H,3aH,4H,5H,8H,9H,11aH-cyclodeca[b]furan-4-yl 2-methylbutanoate	C22 H28 O7	427.172	216.076	8.32191	ND	ND	ND	ND	ND	21.7712
SDW02718	Unknown	C12 H19 F2 N2 O4 P	325.112	85.029	0.757226	20.117	19.818	19.749	20.8463	21.8281	20.1767
SDW02723	N-butyl-N(2)-(2-thienylacetyl)-L-cysteinamide	C13 H20 N2 O2 S2	301.103	116.053	4.45525	13.7696	ND	ND	ND	ND	22.8179
SDW02725	(2E)-3-(4-methoxy-2-{[(2S,3R,4S,5S,6R)-3,4,5-trihydroxy-6-(hydroxymethyl)oxan-2-yl]oxy}phenyl)prop-2-enoic acid	C16 H20 O9	379.099	185.042	4.0053	ND	ND	20.6063	20.5334	21.9558	24.4477
SDW02726	Aspartame	C14 H18 N2 O5	295.128	120.081	3.08715	21.3688	18.9367	23.1215	21.9549	22.232	22.0991
SDW02732	Unknown	C19 H23 F N4 O4	391.176	159.092	5.31126	22.2112	14.5046	13.5041	ND	ND	13.9644
SDW02739	Unknown	C35 H71 F5 N O P3	710.475	569.456	12.505	17.0845	20.7871	16.778	21.785	21.4367	23.2851
SDW02748	Unknown	C26 H52 F4 N3 O3 P3	624.324	104.107	10.7287	24.6378	25.0785	22.6241	15.4944	18.6369	19.7761
SDW02765	Unknown	C34 H74 N5 O7 P	696.54	262.253	12.2681	23.3123	18.6017	24.3446	24.2192	24.2305	15.4001
SDW02769	Heroin-d3	C21 H20 [2]H3 N O5	373.183	203.052	3.90215	ND	14.3126	ND	20.786	16.6321	16.124
SDW02782	Unknown	C20 H38 F N3 O7	452.276	311.257	10.4018	15.9241	18.7948	18.9327	19.5995	14.4321	22.6382
SDW02787	Myricetin	C15 H10 O8	319.044	153.018	5.56201	ND	ND	ND	ND	18.9566	24.1002
SDW02790	Stearoyl Ethanolamide	C20 H41 N O2	350.302	350.185	11.9822	20.3669	21.2217	19.6985	16.2555	16.3964	17.6946
SDW02803	Unknown	unknown	498.154	498.154	5.43842	17.6891	14.2016	22.4024	18.1395	ND	21.7802
SDW02805	9(11)-dehydroaxinysterol	C28 H40 O3	447.286	187.036	12.1089	15.6263	19.7311	20.4179	16.9848	17.1676	15.5851
SDW02810	Unknown	C18 H38 O S2	335.243	335.243	11.3719	24.426	24.2314	24.2121	20.921	20.4992	21.858
SDW02811	(-)-Cholesteryl acetate	C29 H48 O2	429.372	165.091	12.3494	17.9271	19.6673	17.2058	18.1968	17.09	19.5029
SDW02813	Unknown	C20 H28 F3 N O10	522.158	360.105	4.50671	14.2341	16.5035	26.0951	ND	ND	15.5087
SDW02816	3',4'-Methylenedioxyfurano [ 2",3":6,7 ] aurone	C18 H10 O5	307.06	307.06	0.196417	16.4852	16.3863	16.5257	17.0068	16.788	16.5506
SDW02820	NP-020014	C15 H26 O3	277.179	235.169	8.47409	16.9975	18.5203	17.1098	18.4244	18.7712	18.7898
SDW02824	γ-Linolenic acid ethyl ester	C20 H34 O2	313.273	57.0707	13.7232	20.1394	21.5589	19.8788	20.4096	19.1916	19.3305
SDW02829	Demeton-S-Methyl-Sulfone	C6 H15 O5 P S2	263.061	161.029	0.570805	21.0296	18.8842	21.9117	22.0899	22.0352	22.3547
SDW02830	Unknown	C26 H48 F O7 P S	555.293	155.01	11.8899	19.7013	19.5394	17.7618	15.5672	15.6889	20.2373
SDW02843	Unknown	C15 H15 N7 O4	358.128	177.054	5.23026	ND	21.1434	ND	ND	ND	ND
SDW02848	Unknown	C12 H23 N O S	230.157	230.157	0.765748	21.758	ND	ND	ND	20.7428	ND
SDW02849	Unknown	C11 H21 F3 N3 O4 P	348.129	188.082	1.84111	14.4961	ND	15.9538	16.7357	23.3153	14.7027
SDW02852	Unknown	C22 H46 N2 O	355.368	72.0815	10.4386	ND	20.7835	15.9133	ND	13.5679	13.937
SDW02857	Dexamethasone	C22 H29 F O5	393.206	147.08	7.59091	14.2247	16.1803	15.8746	16.2952	16.2552	16.1242
SDW02860	Unknown	C22 H40 F4 N O P S	474.259	60.0564	8.84246	13.6157	17.2866	15.5677	17.7769	17.652	17.9362
SDW02862	NP-015904	C21 H34 O11	485.199	335.094	4.56378	ND	ND	ND	22.7504	13.8634	ND
SDW02868	Unknown	C9 H13 Cl F N4 O3 P S	343.021	301.01	0.57701	18.2376	16.1701	17.4456	21.1659	20.7799	19.6358
SDW02869	Unknown	C25 H32 N2 O11	537.208	188.07	2.4678	18.5212	17.5758	21.9711	17.8699	15.9533	21.0771
SDW02870	4,4'-Bis(3-methyl-5-oxo-1-phenylpyrazolinylidene)	C20 H16 N4 O2	345.13	132.044	2.72142	21.8652	15.4395	20.013	18.0714	13.3451	15.3147
SDW02879	Unknown	C10 H23 F3 N5 O2 P S	366.132	366.132	0.937888	22.4784	24.8034	25.8933	26.6248	25.966	26.59
SDW02889	NP-020014	C15 H26 O3	277.179	235.169	8.46849	16.9227	18.5339	17.0284	18.3602	18.8216	18.7386
SDW02892	Unknown	unknown	525.667	525.667	0.777442	23.1739	21.9935	23.6139	23.9176	22.5168	23.3896
SDW02894	5-(2-Methylthioethyl)hydantoin	C6 H10 N2 O2 S	175.054	70.0659	0.697549	23.8273	23.244	24.5865	29.8414	30.4297	27.4689
SDW02897	2-(3,5-Dinitrophenyl)-5-[4-(2-methyl-2-propanyl)phenyl]-1,3,4-oxadiazole	C18 H16 N4 O5	369.117	207.065	6.02913	16.2101	25.4508	18.0613	ND	ND	ND
SDW02919	Unknown	C18 H29 N2 O3 P	353.199	241.111	9.55048	20.2537	17.7681	14.952	ND	ND	ND
SDW02920	γ-Linolenic acid ethyl ester	C20 H34 O2	313.273	57.0707	11.2653	23.6631	22.895	23.222	22.3327	22.0326	22.3565
SDW02921	Unknown	C19 H33 N2 O2 P	353.236	339.22	11.6282	18.8943	20.3187	19.8073	16.0781	14.8335	17.6576
SDW02922	benzyl N-(1-{[(3,4-dimethoxyphenethyl)amino]carbonyl}-2-methylpropyl)carbamate	C23 H30 N2 O5	453.172	307.115	5.11026	13.5281	ND	ND	ND	16.2578	20.0397
SDW02923	5,10,15-trimethyl-4,9,13-trioxatetracyclo[10.3.0.0Âl,âµ.0â¸,Âaâ°]pentadec-1(15)-en-14-one	C15 H20 O4	247.132	187.111	5.12846	ND	ND	13.8342	22.0557	16.7949	15.7801
SDW02924	Unknown	C6 H14 N3 O P S	208.066	178.032	3.06243	ND	ND	ND	ND	ND	20.5111
SDW02929	L-(-)-Threonine	C4 H9 N O3	120.066	103.055	1.70829	25.2438	24.0139	28.8789	26.4048	28.2429	27.6666
SDW02935	Unknown	C27 H43 F N4 O7 P2	617.267	437.204	11.8866	23.8691	23.427	19.8124	19.1094	19.3753	24.0512
SDW02944	Tricin 5-O-β-D-glucoside	C23 H24 O12	493.133	331.081	6.42283	21.4193	25.0243	20.6803	15.4012	16.8943	20.9522
SDW02945	Unknown	C20 H40 F N2 O6 P	455.268	339.22	11.2811	17.7242	20.7093	19.019	17.4088	ND	14.0373
SDW02963	5-OxoETE	C20 H30 O3	319.224	301.216	8.46209	20.3861	20.6242	20.2812	21.3027	20.8424	21.0712
SDW02965	3-(4-Chlorophenyl)-2-{2-[3-(2-methylpyrimidin-4-yl)phenyl]hydrazono}-3-oxopropanenitrile	C20 H14 Cl N5 O	376.1	214.047	3.63251	ND	14.2622	23.8338	17.3637	ND	ND
SDW02968	Unknown	unknown	65.0391	65.0391	0.841419	23.5362	23.8944	22.1513	22.3486	22.3524	21.659
SDW02977	Unknown	C21 H43 F N3 O3 P	436.309	394.299	11.9952	17.0776	16.1748	16.1442	18.023	17.8228	16.7866
SDW02982	Unknown	C17 H34 F4 N O3 P3 S	502.148	153.054	2.86555	17.946	14.4244	21.093	16.0439	ND	21.5769
SDW02984	Unknown	C18 H32 N4 O10	465.217	301.211	11.5722	24.833	23.944	24.006	24.8685	25.2486	25.2564
SDW02986	Demeton-S-Methyl-Sulfone	C6 H15 O5 P S2	263.061	161.029	0.585412	21.5905	19.2962	22.4861	22.4886	22.4936	22.6191
SDW02988	Unknown	unknown	117.989	72.0815	0.778991	21.411	20.6413	23.6809	21.4514	22.165	22.9451
SDW02990	4-Hydroxybenzaldehyde	C7 H6 O2	123.044	95.0496	0.880389	23.2339	27.2074	26.6104	22.3267	23.9635	25.0783
SDW02992	Unknown	C2 H7 N2 O3 P	139.027	121.029	0.860903	19.9621	21.2374	22.4375	21.9756	21.5405	21.0424
SDW02994	5-(1,2,4a,5-tetramethyl-7-oxo-1,2,3,4,4a,7,8,8a-octahydronaphthalen-1-yl)-3-methylpentanoic acid	C20 H32 O3	343.224	240.232	9.36886	22.0117	22.1758	22.1457	22.4824	22.9332	22.7263
SDW03000	Unknown	C2 H6 N O4 P	140.011	140.011	0.75925	22.1899	22.4224	21.8661	20.8265	22.5063	21.7985
SDW03002	Verrucarol	C15 H22 O4	267.159	179.106	7.91329	ND	ND	ND	21.8827	ND	16.8531
SDW03012	Unknown	C16 H27 F N4 O2	327.22	313.204	11.5744	20.4601	21.1088	21.1711	19.4622	19.4944	20.015
SDW03017	5-{(2R,3S)-6-Hydroxy-2-(4-hydroxyphenyl)-4-[(E)-2-(4-hydroxyphenyl)vinyl]-2,3-dihydro-1-benzofuran-3-yl}-1,3-benzenediol	C28 H22 O6	455.148	107.049	5.58287	ND	ND	ND	ND	22.0528	ND
SDW03027	Unknown	C26 H49 F O	397.382	81.0705	12.4218	19.1318	19.6963	17.5541	19.4253	20.0474	19.2509
SDW03028	Unknown	C3 H10 F N4 P S	185.042	143.002	0.582682	18.0199	19.8222	19.4848	18.6773	18.3718	18.5929
SDW03045	NP-016596	C19 H30 O8	409.183	409.111	4.17955	24.4819	24.0912	27.099	24.5703	25.0088	25.7014
SDW03047	Unknown	C16 H31 F N3 O8 P S	476.16	134.045	0.763094	19.2799	19.7896	21.4766	22.381	19.9159	20.4778
SDW03051	Unknown	C7 H2 Cl F N6	225.008	177.009	0.583134	15.5917	ND	16.9077	17.6818	17.4035	17.5381
SDW03053	1-Linoleoyl glycerol	C21 H38 O4	337.273	81.0704	13.4658	21.6794	22.9637	21.2388	18.601	18.3017	20.5712
SDW03054	Unknown	C18 H40 N6 O2 S2	437.274	175.045	11.0848	22.1991	21.5825	22.1794	16.8772	15.8189	18.4417
SDW03057	Unknown	C5 H5 N3 O5 S2	251.974	192.961	1.05886	20.28	22.58	15.9774	15.2497	16.3197	15.2877
SDW03066	cis-Resveratrol	C14 H12 O3	229.086	107.049	6.07673	ND	ND	ND	ND	21.9037	ND
SDW03071	Unknown	C16 H32 F N O14 P2	544.135	544.135	0.748405	25.3042	24.1667	26.6781	26.8164	25.2227	27.6522
SDW03088	(2S,3R,4S,5S,6R)-2-{4-[(1S,3aR,4S,6aR)-4-(4-hydroxy-3,5-dimethoxyphenyl)-hexahydrofuro[3,4-c]furan-1-yl]-2,6-dimethoxyphenoxy}-6-(hydroxymethyl)oxane-3,4,5-triol	C28 H36 O13	603.204	441.152	5.98612	ND	13.6369	24.3642	ND	ND	ND
SDW03093	2210033	C12 H14 O3	207.101	176.083	5.85058	ND	ND	ND	ND	ND	21.3937
SDW03099	FG7175000	C9 H7 N O	146.06	146.06	4.10406	17.7102	18.9795	25.9373	15.8441	22.3395	19.8759
SDW03111	Hexylresorcinol	C12 H18 O2	195.138	135.117	7.17666	15.8645	ND	20.5676	ND	ND	23.5087
SDW03117	2-{[(4,5-dimethoxy-2-nitrophenethyl)imino]methyl}phenol	C17 H18 N2 O5	331.136	169.083	4.67163	19.5269	16.7166	20.3492	17.111	14.7595	17.8002
SDW03123	Allantoin	C4 H6 N4 O3	159.051	61.0404	0.8182	18.0613	18.5301	15.5359	15.4828	15.8413	14.3639
SDW03130	Unknown	C21 H17 Cl2 F N2 O S2	467.022	443.022	0.582609	15.9315	ND	18.1087	19.5093	18.9625	19.7145
SDW03134	Unknown	C24 H47 O4 P S	463.3	104.993	11.2222	20.0697	20.931	21.0814	20.5975	19.9623	21.5811
SDW03139	Unknown	C13 H24 F2 N6 O3 P2	413.141	136.062	3.60353	19.3099	15.6929	20.4863	22.5936	18.24	20.9976
SDW03144	Unknown	C16 H34 N7 O6 P	452.24	184.073	6.6135	ND	ND	ND	ND	ND	23.4973
SDW03149	Isofenphos-oxon	C15 H24 N O5 P	331.153	151.075	5.61872	ND	ND	ND	21.8686	18.7083	ND
SDW03157	Unknown	C24 H48 N6 O10	603.334	423.271	10.8954	22.0686	22.251	21.9105	20.8697	15.5063	21.5514
SDW03159	(2S,3R,4S,5S,6R)-2-{4-[(1S,3aR,4S,6aR)-4-(4-hydroxy-3,5-dimethoxyphenyl)-hexahydrofuro[3,4-c]furan-1-yl]-2,6-dimethoxyphenoxy}-6-(hydroxymethyl)oxane-3,4,5-triol	C28 H36 O13	603.204	441.151	5.98388	ND	13.6146	24.3655	ND	ND	ND
SDW03160	Unknown	C12 H11 F2 N2 O3 P	301.055	139.05	0.89386	15.5408	ND	15.9638	23.1559	16.5736	16.4775
SDW03167	2-(4-Methylphenyl)-5-{(3S)-1-[4-(trifluoromethoxy)benzyl]-3-pyrrolidinyl}-1,3,4-oxadiazole	C21 H20 F3 N3 O2	404.152	242.099	2.13358	13.633	13.5973	15.0601	ND	17.1883	23.904
SDW03168	C16 phytosphingosine	C16 H35 N O3	290.268	228.232	7.39258	18.0276	20.3313	20.3903	20.8867	19.9571	21.0676
SDW03179	Unknown	C10 H17 F5 N2 O10 P2 S	515.007	104.107	10.9343	22.0068	23.0201	20.4803	ND	ND	17.57
SDW03181	(+)-7-Iso-Jasmonyl-L-isoleucine	C18 H29 N O4	324.216	278.211	9.36983	ND	ND	ND	ND	ND	23.2309
SDW03184	Unknown	C38 H63 F5 O2	647.485	547.397	12.0981	16.7469	17.1708	18.9659	ND	14.0397	16.8024
SDW03185	Unknown	C16 H22 F N2 O12 P	485.096	98.9757	4.15974	17.3987	16.8315	19.5223	18.1378	17.2446	18.707
SDW03198	Unknown	C19 H34 N4 O2 S	383.246	341.236	11.9373	19.4355	20.475	20.9924	19.1594	19.6804	19.3943
SDW03200	Cysteinylglycine	C5 H10 N2 O3 S	179.048	76.0222	0.834283	17.1761	16.1429	20.5296	22.0184	21.2232	ND
SDW03202	Dihomo-γ-linolenic acid ethyl ester	C22 H38 O2	341.305	57.0707	11.6889	21.6495	21.5575	21.7073	21.0248	21.0942	21.0719
SDW03203	γ-Linolenic acid ethyl ester	C20 H34 O2	313.273	57.0707	13.6966	20.0963	21.5	19.9023	20.4189	19.112	19.6205
SDW03204	Unknown	C30 H61 F2 N2 O5 P	599.433	319.194	11.3699	23.895	24.6072	24.0102	14.9941	16.6947	21.4827
SDW03207	Unknown	C31 H72 F N9 O S4	734.48	734.48	12.7014	21.039	23.0068	22.2715	26.1161	22.022	25.5668
SDW03210	C16 phytosphingosine	C16 H35 N O3	290.268	228.232	7.39072	17.548	20.237	20.118	20.8687	19.8997	21.0812
SDW03218	Unknown	C14 H31 Cl N8 O	363.238	321.227	11.3582	19.2624	21.1096	19.8978	16.3679	ND	16.7126
SDW03221	L-gamma-Glutamyl-L-leucine	C11 H20 N2 O5	261.144	86.097	2.79973	19.5682	17.3252	21.8314	17.7147	20.6313	20.5269
SDW03225	Unknown	C26 H32 F6 N2 O2	541.225	335.094	4.12625	ND	ND	ND	23.7912	20.2523	15.6144
SDW03227	Unknown	C35 H62 F4 N5 O3 P	730.441	589.482	12.081	17.6747	15.8935	18.8895	18.9008	17.778	21.9109
SDW03230	Unknown	unknown	117.989	59.0737	0.732562	28.5016	23.7517	22.5616	20.367	21.3225	20.0205
SDW03235	1099281	C9 H6 O	131.049	131.049	4.09376	13.6532	13.9092	23.7619	18.5745	ND	18.3058
SDW03240	Hexylresorcinol	C12 H18 O2	195.138	79.0549	7.17568	13.5285	ND	19.4695	ND	ND	21.6015
SDW03243	Orbofiban	C17 H23 N5 O4	361.138	235.075	2.34298	ND	13.8462	13.7217	14.9763	20.2102	18.4204
SDW03260	Unknown	C32 H31 N6 O6 P	644.239	85.029	2.05763	22.9982	ND	ND	ND	ND	13.4697
SDW03267	Unknown	C27 H29 F N2 O6 P2	559.156	162.055	5.55571	ND	ND	23.1032	ND	ND	ND
SDW03270	1-Aminocyclododecanecarboxylic acid	C13 H25 N O2	228.195	95.086	8.07341	14.9936	19.2243	19.0895	19.5165	19.6052	19.3734
SDW03274	6-Methylquinoline	C10 H9 N	144.081	117.07	2.49807	26.1033	21.37	24.4332	22.8139	21.507	25.1839
SDW03283	NP-004400	C26 H36 O12	563.209	366.128	4.87834	ND	ND	ND	21.2635	14.9562	ND
SDW03296	Unknown	C14 H6 O	191.049	98.9757	0.58757	19.5698	19.1824	16.5509	21.1588	21.2164	19.1733
SDW03302	Ethyl 4,5-dimethyl-2-(1-naphthoylamino)-3-thiophenecarboxylate	C20 H19 N O3 S	354.118	146.06	3.98782	ND	ND	21.8876	ND	ND	ND
SDW03307	Unknown	C10 H28 N7 O10 P S	470.144	76.0222	0.85042	14.0554	ND	18.3074	19.1604	20.3473	ND
SDW03317	ala-ala-pro	C11 H19 N3 O4	258.144	212.139	0.709302	13.6518	16.9772	13.3556	18.6837	18.1816	18.2576
SDW03333	2-{2-[2-(Octylamino)ethoxy]ethoxy}ethanol	C14 H31 N O3	262.237	200.201	5.80472	18.8441	19.2167	19.6712	19.7818	19.0142	19.9463
SDW03335	Unknown	C26 H25 F2 N2 O5 P	515.154	177.054	6.79671	16.2768	17.7604	23.4603	ND	ND	24.088
SDW03336	(2R)-7-Methoxy-3-oxo-3,4-dihydro-2H-1,4-benzoxazin-2-yl β-D-glucopyranoside	C15 H19 N O9	380.095	172.075	4.10527	ND	ND	25.5071	ND	ND	ND
SDW03343	Maritimetin 6- (6"-p-coumarylglucoside)	C30 H26 O13	595.144	127.039	2.34674	ND	ND	ND	ND	23.0673	ND
SDW03351	Unknown	unknown	118.058	118.058	0.762243	30.7947	27.2312	27.2457	24.9436	25.7488	25.7979
SDW03354	Cytosine	C4 H5 N3 O	112.051	95.0244	0.756545	21.3965	21.191	21.4535	17.7868	18.4988	19.2662
SDW03358	2-(3,5-Dinitrophenyl)-5-[4-(2-methyl-2-propanyl)phenyl]-1,3,4-oxadiazole	C18 H16 N4 O5	369.117	207.065	3.9519	16.8675	22.5771	22.5276	ND	ND	14.5734
SDW03359	Unknown	C21 H39 F N4 O4 P2	493.248	104.993	11.9409	22.9384	23.8725	23.8825	22.7614	23.2027	23.3155
SDW03361	Unknown	C4 H2 F6 N3 O9 P3 S3	539.814	539.319	10.7044	23.6947	24.3811	23.2665	17.2871	16.8878	21.8608
SDW03362	Unknown	C31 H40 Cl F N4	523.299	523.299	11.0358	26.5367	27.9268	27.409	23.0276	22.5103	24.4574
SDW03363	Docosahexaenoic acid methyl ester	C23 H34 O2	349.271	317.178	11.1248	17.1884	17.9875	17.3878	16.0422	14.0522	18.2608
SDW03367	Unknown	C31 H41 N7 O2	544.337	60.0564	10.7063	17.3046	17.0938	16.2074	18.6494	18.8983	18.6589
SDW03371	AM9627000	C8 H7 N O3	166.05	95.0496	5.17682	ND	ND	19.0104	ND	ND	ND
SDW03376	Unknown	C10 H13 F2 N3 O6	310.086	120.081	1.93339	19.558	15.5303	20.6207	19.646	23.1315	18.5153
SDW03378	Unknown	C13 H19 N9 O12	494.123	494.123	4.3513	19.1963	16.1062	26.582	14.7499	13.8953	14.777
SDW03381	5-[(10Z)-14-(3,5-dihydroxyphenyl)tetradec-10-en-1-yl]benzene-1,3-diol	C26 H36 O4	413.266	301.141	11.7561	23.8552	23.0182	23.3635	23.0898	23.0454	22.7731
SDW03383	glu-asp	C9 H14 N2 O7	263.087	84.0814	0.754989	18.8516	17.316	20.5422	18.1336	19.8965	17.5727
SDW03388	Dimethyl 5-(2-quinolinyl)-1,2,4-triazine-3,6-dicarboxylate	C16 H12 N4 O4	325.139	191.081	4.64612	20.6466	22.7989	22.1982	17.3282	23.2597	23.2654
SDW03389	Unknown	C37 H62 F3 P S	627.434	325.211	11.3723	27.5449	27.9921	27.5459	18.3477	20.0729	25.0534
SDW03400	Cyanophos	C9 H10 N O3 P S	244.021	244.021	0.580409	20.9116	18.5401	21.8325	22.6624	22.3941	22.6094
SDW03407	Unknown	C22 H37 N O6 P2 S	506.187	147.044	0.863945	ND	22.5249	18.6733	13.7716	14.1552	14.7971
SDW03408	Unknown	C14 H24 F3 N2 O4 P	395.131	215.068	4.31219	15.2568	17.0032	18.892	21.0964	18.878	22.7061
SDW03409	Unknown	C25 H48 F N2 O3 P S	529.298	115.037	10.9413	ND	13.7555	17.424	ND	ND	13.4301
SDW03412	Unknown	C3 H4 N4 O S2	176.989	160.076	1.59339	16.3022	17.4675	13.4364	ND	ND	25.7579
SDW03418	Unknown	C16 H31 F5 O4 P2 S	494.169	161.06	4.79407	ND	ND	ND	15.4983	14.3357	18.4251
SDW03422	Unknown	C20 H38 F2 O4 S2	445.224	313.273	11.2795	19.9466	17.9276	19.6791	17.7089	17.6208	17.3945
SDW03423	4-Methylumbelliferyl-α-D-glucopyranoside	C16 H18 O8	339.107	177.054	6.08949	15.0695	23.1836	19.3695	ND	ND	ND
SDW03426	Unknown	C9 H24 N9 O5 P	370.17	370.17	0.737328	18.6014	19.8614	19.9627	17.489	18.6131	17.6513
SDW03443	Unknown	C17 H17 F3 O9	423.091	273.039	4.7371	ND	ND	ND	21.0741	ND	ND
SDW03444	Unknown	C34 H59 F O8 P2	699.356	537.303	10.3178	25.2152	22.0939	22.9652	20.7788	19.7447	22.254
SDW03447	Unknown	C2 H7 Cl N8 O3	227.04	185.029	0.580825	21.2257	16.5758	22.5282	23.2126	22.9218	23.2624
SDW03454	Unknown	C17 H29 F3 N2 O4	383.214	301.211	11.5635	25.6315	25.2613	25.2944	25.1571	25.1804	25.4861
SDW03455	Unknown	C6 H9 F N P	146.053	72.0815	0.559555	19.1033	18.3434	21.9912	23.9207	22.3577	22.9071
SDW03456	α-Eleostearic acid	C18 H30 O2	279.232	67.055	10.1597	22.6197	24.3786	18.4335	16.0733	17.7767	22.7907
SDW03464	Unknown	C15 H29 F3 O13	513.121	513.121	0.751159	18.2226	18.4577	26.3027	25.2196	23.5066	23.635
SDW03467	1-(9Z-hexadecenoyl)-2-(9Z,12Z-octadecadienoyl)-sn-glycerol	C37 H66 O5	591.497	313.273	13.7146	20.4446	20.3522	20.038	20.1044	20.7581	20.6621
SDW03471	Unknown	C26 H32 N6 O12	621.215	232.07	5.47005	13.8047	ND	20.9878	ND	ND	ND
SDW03483	Unknown	unknown	97.9918	97.9918	0.788901	21.7056	22.0199	21.344	20.5058	21.8839	21.4573
SDW03491	(5R)-3-[(1R)-1-Hydroxyoctyl]-5-methyl-2(5H)-furanone	C13 H22 O3	227.091	181.049	4.20902	18.6695	14.6392	16.5667	13.9146	16.1263	23.2482
SDW03496	Unknown	C20 H34 F3 N4 P S2	483.2	325.211	11.4108	22.3977	21.444	21.8927	20.1182	21.0104	23.1671
SDW03500	Pivaloylacetonitrile	C7 H11 N O	126.091	126.091	0.738633	20.2108	21.3506	22.3784	17.2861	19.1643	22.7126
SDW03501	Unknown	C27 H56 F N9 O6	622.444	184.073	11.848	16.4518	15.0459	17.6771	17.4453	15.8251	22.5779
SDW03511	Unknown	C16 H34 N2 O4	319.259	319.259	0.883841	21.7129	21.5928	21.2141	22.7159	25.897	20.3285
SDW03512	N-hydroxy-4-aminobiphenyl O-glucuronide	C18 H19 N O7	362.123	235.075	4.1431	ND	14.3691	ND	18.9635	22.5659	17.0285
SDW03513	Unknown	unknown	116.972	98.9758	0.583331	22.021	21.5409	19.9888	23.9374	23.7074	21.4784
SDW03526	Unknown	C30 H61 F N6 O3	573.487	573.487	11.7255	22.4726	23.8261	23.2825	21.4722	21.1146	23.1199
SDW03527	PALGLY	C18 H35 N O3	314.268	314.268	9.39593	16.5186	17.3362	18.0935	18.961	17.3722	18.4645
SDW03530	Unknown	unknown	131.961	86.097	0.895948	21.0707	19.7267	23.449	20.0666	22.6316	22.9958
SDW03532	Unknown	C11 H19 F3 N4 O6 S	393.106	98.9757	3.31509	20.1943	ND	20.6118	17.0443	16.8778	18.0784
SDW03534	128330	C7 H8 O4	157.05	111.075	0.728643	19.5733	19.4871	23.5554	19.6169	20.234	22.0883
SDW03538	(2R,3S,4S,5R,6R)-2-({[(2S,3R,4R)-3,4-dihydroxy-4-(hydroxymethyl)oxolan-2-yl]oxy}methyl)-6-{[4-(4-hydroxyphenyl)butan-2-yl]oxy}oxane-3,4,5-triol	C21 H32 O11	483.183	317.084	6.51521	ND	ND	ND	23.5113	ND	ND
SDW03552	Unknown	unknown	278.572	98.9758	0.576988	20.3414	20.4019	19.5649	21.7004	22.0441	19.8954
SDW03555	Morphine-D3	C17 H16 D3 N O3	311.146	98.9758	7.17581	ND	ND	18.9308	ND	ND	19.0844
SDW03565	Unknown	C11 H13 F2 N6 O5 P S	411.044	411.044	0.719742	20.3561	21.0577	28.1125	20.7059	21.8077	21.8466
SDW03568	Unknown	C20 H35 N2 O3 P	383.246	341.236	11.9387	18.7941	19.5142	20.1067	18.5546	19.0594	18.7527
SDW03569	Dihexyverine	C20 H35 N O2	322.273	62.0608	10.601	18.1098	14.7627	13.4467	ND	ND	ND
SDW03571	Unknown	C15 H14 O7	307.081	139.039	2.40743	ND	ND	ND	14.8095	23.4804	16.6593
SDW03573	Unknown	C16 H34 F4 N O7 P3	522.156	522.156	4.95029	16.0149	15.75	16.8996	17.8873	16.2698	26.2963
SDW03574	Unknown	C3 H7 F N3 O4 P	200.022	98.9757	0.584228	17.7746	17.0193	15.5668	20.0683	19.6201	17.9016
SDW03581	Skatole	C9 H9 N	132.081	132.081	1.59818	17.5899	14.5501	18.8477	16.0635	19.662	24.912
SDW03586	Unknown	C31 H67 N4 O4 P	591.497	313.273	13.7147	20.3485	20.2304	19.9854	19.9643	20.6508	20.5281
SDW03590	Unknown	C19 H38 F2 N4 O8	511.255	451.234	11.2717	23.5991	23.0775	23.0863	22.8487	22.8349	22.739
SDW03591	Unknown	C19 H35 N2 O4 P	387.241	313.204	11.5583	16.6783	17.148	17.3665	16.011	15.9933	16.3051
SDW03602	Unknown	C19 H23 F6 N O9	524.134	130.065	3.66717	ND	ND	20.9143	ND	ND	ND
SDW03613	Unknown	C28 H57 F4 N4 O5 P3	699.356	537.303	10.2017	22.0883	21.7662	23.0349	21.6944	21.0012	23.7868
SDW03618	Diosmetin	C16 H12 O6	301.07	70.0658	4.10081	ND	ND	ND	ND	18.6815	ND
SDW03650	Unknown	C6 H12 Cl F N P	184.045	86.097	0.752541	21.5184	21.6882	24.7859	21.6218	21.6743	20.7146
SDW03652	NP-006862	C20 H32 O4	359.216	229.117	9.55081	20.2641	17.7271	13.5802	ND	ND	ND
SDW03657	Unknown	C23 H30 F2 N4 O5 S	513.196	177.055	7.21982	ND	ND	ND	ND	ND	19.3556
SDW03658	5-Methoxydimethyltryptamine	C13 H18 N2 O	219.149	131.049	4.3311	ND	ND	20.6274	17.5597	ND	ND
SDW03660	1879729	C10 H11 N O4	210.076	164.07	0.797014	17.0606	16.1821	15.7857	16.4381	16.9505	22.7466
SDW03666	Lidocaine	C14 H22 N2 O	235.18	86.097	3.52861	20.882	20.7704	21.1577	20.8707	20.9672	21.0166
SDW03676	Unknown	C16 H3 F2 N2 O5 P3 S3	530.846	530.846	0.573301	24.2829	24.2993	22.0122	21.7125	21.111	21.8532
SDW03681	Unknown	C18 H12 F5 N3 O	382.097	342.084	8.44534	ND	ND	ND	ND	ND	22.025
SDW03683	Unknown	C11 H9 F2 N O4 S2	322	162.055	3.42744	ND	ND	19.5023	ND	ND	ND
SDW03688	Unknown	C14 H30 F2 N2 O4 S3	425.142	425.142	0.576489	20.8567	16.7793	22.1427	23.6789	23.3426	23.5264
SDW03694	Unknown	C16 H28 F3 N5 O7 S	492.174	150.058	0.83742	17.4654	17.6473	21.1735	17.7754	16.6908	20.2959
SDW03696	Docosahexaenoic acid methyl ester	C23 H34 O2	349.271	317.178	11.1126	17.3316	18.0164	17.5603	16.4418	13.8475	18.4284
SDW03708	Demethylwedelolactone	C15 H8 O7	301.035	223.021	0.574404	16.6929	15.29	17.673	18.3692	18.5296	19.3157
SDW03713	1,3-Benzodioxolylbutanamine (BDB)	C11 H15 N O2	194.117	135.044	0.867992	21.5292	22.6256	22.267	22.3107	22.8094	21.9231
SDW03714	Unknown	C21 H32 F N5 O3	422.257	362.236	10.889	22.8015	19.0747	17.8228	15.1254	15.5954	15.3065
SDW03716	Unknown	C26 H64 N9 O5 P	614.485	614.485	13.1921	23.6117	23.2609	20.9497	25.0413	23.9891	27.0942
SDW03745	Unknown	C21 H34 F N6 O2 P	453.251	337.204	11.0754	21.9362	21.6283	22.1138	16.0071	15.2403	18.0381
SDW03747	(2E)-3-(4-methoxy-2-{[(2S,3R,4S,5S,6R)-3,4,5-trihydroxy-6-(hydroxymethyl)oxan-2-yl]oxy}phenyl)prop-2-enoic acid	C16 H20 O9	379.099	378.964	3.99853	14.7448	14.9582	22.9564	22.7872	24.0607	26.5822
SDW03754	5-Dimethoxymethyl-1-ethyl-1H-pyrazole	C8 H14 N2 O2	171.149	72.0451	0.579272	15.6624	15.0004	19.8176	16.2772	15.2446	19.6968
SDW03762	Unknown	C16 H21 F O12	425.107	177.054	7.23321	ND	ND	16.321	ND	ND	22.7599
SDW03774	Quercetin-3β-D-glucoside	C21 H20 O12	465.102	303.049	6.02387	ND	ND	16.4087	16.0986	21.4333	17.444
SDW03775	Unknown	C21 H28 F6 N2 O4	487.201	323.195	11.1182	24.8908	24.7696	25.0586	23.4025	20.8375	25.0806
SDW03776	Unknown	C11 H18 N2 O11	355.099	192.039	2.4466	18.4888	14.0404	23.1439	20.0952	18.7825	21.2149
SDW03778	Unknown	C15 H40 N10 O3 S	441.306	175.045	11.6822	21.3846	20.0729	20.673	20.9335	21.0036	20.8126
SDW03810	Unknown	unknown	131.961	131.961	0.577625	19.7724	19.09	19.2029	18.9531	17.5676	21.9233
SDW03817	linolenyl alcohol	C18 H32 O	265.252	69.0706	11.6345	21.2095	23.6767	22.6155	18.3309	17.8798	20.3346
SDW03827	Hexylresorcinol	C12 H18 O2	195.138	79.0548	7.16988	13.5581	ND	19.4046	ND	ND	21.4987
SDW03832	Unknown	C22 H49 F2 N9 O6	574.384	574.384	12.5777	18.249	20.1267	21.1972	25.6327	24.3248	25.6194
SDW03842	Unknown	C15 H21 F3 O8	387.128	207.065	4.62982	16.0404	20.9843	20.6878	16.9753	ND	14.8274
SDW03844	Mesalazine	C7 H7 N O3	154.05	137.06	0.85569	ND	13.5083	16.3178	13.6333	16.5896	27.8188
SDW03851	Cyclohexamide	C15 H23 N O4	281.099	136.062	3.05782	18.6806	15.2595	23.5768	16.7796	17.1141	21.1385
SDW03859	Unknown	C36 H72 F3 N3 O5 S	716.522	575.503	12.8098	23.0844	24.4675	23.3303	25.3089	26.3594	25.622
SDW03883	Unknown	C18 H21 N O8	380.133	172.075	3.68084	ND	ND	24.792	ND	ND	ND
SDW03885	Unknown	C20 H41 F4 N9 S	516.322	516.322	10.9861	25.5167	26.3478	23.691	20.3924	19.4697	20.8474
SDW03890	Unknown	C23 H55 F N9 O5 P	588.409	588.911	7.73512	16.9112	23.0831	21.145	22.4436	22.7772	22.6889
SDW03894	Unknown	C22 H50 F3 Fe N6 P	541.324	541.324	11.0928	27.4139	25.5896	27.1626	23.4097	18.8208	22.1495
SDW03900	Unknown	C17 H21 F2 N2 O4 P	387.128	207.065	4.6364	ND	20.7511	20.3435	17.2869	ND	13.9876
SDW03908	Unknown	C29 H55 F2 Fe O P	543.34	543.34	11.0915	23.3933	21.118	23.4746	19.8759	18.6056	16.9633
SDW03915	Hexadecanamide	C16 H33 N O	256.263	88.0763	8.54116	19.8646	19.8065	19.4038	20.1298	19.8815	19.9962
SDW03917	4-Cyano-N-[(1R,9S)-11-(2-naphthoyl)-6-oxo-7,11-diazatricyclo[7.3.1.02,7]trideca-2,4-dien-5-yl]benzamide	C30 H24 N4 O3	511.178	216.075	5.96468	ND	ND	ND	20.5745	15.6183	ND
SDW03936	Unknown	C27 H29 N5 O2 S3	552.155	432.113	4.11679	ND	ND	18.4161	ND	ND	ND
SDW03938	[Similar to: L-Histidine; ΔMass: -0.0264 Da]	C3 H9 N O6	156.051	110.072	0.722688	22.1753	21.8559	24.703	23.132	25.5185	27.1543
SDW03940	Unknown	C18 H23 N7 O4	402.188	152.056	1.57171	ND	14.6064	ND	ND	ND	19.1517
SDW03949	Unknown	C7 H7 F O S2	191	98.9758	0.592038	19.545	19.4204	14.8405	21.2221	21.1679	19.0965
SDW03951	Unknown	C3 H3 F N4 O5 P2	256.964	98.9757	0.593405	20.5255	19.9363	16.4066	23.959	24.0509	20.6829
SDW03956	Unknown	C11 H24 F2 N10 O S3	447.132	447.132	2.14544	ND	19.0254	14.8852	24.5046	20.3345	14.4872
SDW03958	6-Methyl-1,2,4-triazine-3,5-dithiol	C4 H5 N3 S2	160	96.0812	0.77484	19.6104	22.2009	18.9973	19.9651	20.683	18.3091
SDW03961	Unknown	C24 H56 N8 O9	601.424	601.424	12.3834	21.9088	24.5627	21.1164	23.1221	23.7672	22.9176
SDW03962	2-Acetyl-4-hydroxyphenyl beta-D-glucopyranoside	C14 H18 O8	332.133	107.049	3.21647	ND	ND	ND	19.5129	14.2631	ND
SDW03969	Unknown	C7 H16 N O4 P	210.088	167.07	4.69228	13.7787	ND	16.6964	14.6684	ND	19.4658
SDW03970	(1R,9S)-5-[(E)-2-(4-Chlorophenyl)vinyl]-11-(4-methylbenzoyl)-7,11-diazatricyclo[7.3.1.02,7]trideca-2,4-dien-6-one	C27 H25 Cl N2 O2	445.161	301.119	4.22977	ND	ND	16.2854	ND	20.7493	16.2352
SDW03971	Bisoprolol	C18 H31 N O4	326.232	86.097	7.83415	ND	ND	21.2804	ND	ND	ND
SDW03991	Unknown	unknown	114.947	101.009	0.586332	24.8264	22.0435	25.7192	26.0998	25.8289	26.0811
SDW04005	(22R,23R,24S)-22,23-Dihydroxyergost-4-en-3-one	C28 H46 O3	453.333	187.036	12.3405	14.5803	18.9196	18.6719	13.9953	21.2607	15.9612
SDW04008	4829	C36 H62 N4	551.503	57.0707	13.6803	18.4559	18.2873	18.2525	18.2335	18.4795	18.5115
SDW04010	Protocatechuic aldehyde	C7 H6 O3	139.039	121.029	2.90103	15.401	19.0958	24.5396	17.8741	20.7781	13.7336
SDW04016	Unknown	C3 H5 N3 O5	164.03	55.9352	0.648454	15.5321	16.3143	22.0713	23.3678	14.0076	20.4047
SDW04017	[Similar to: N1-(2,6-dichlorobenzoyl)indoline-1-carboxamide; ΔMass: -189.0580 Da]	unknown	145.977	128.05	4.12056	16.0685	17.3587	24.4453	13.3619	13.49	14.5421
SDW04019	Unknown	C13 H13 F3 O6	323.073	185.042	2.89349	14.822	18.3698	24.2408	ND	20.7563	15.821
SDW04020	Tiotropium	C19 H21 N O4 S2	392.1	144.048	3.25778	ND	ND	ND	19.9401	15.1296	14.2061
SDW04021	1-(4-(((3S,3'R,4'S,5'S,6'R)-3',4',5'-TRIHYDROXY-6'-(HYDROXYMETHYL)SPIRO(1H-ISOBENZOFURAN-3,2'-TETRAHYDROPYRAN)-5-YL)METHYL)PHENYL)ETHANONE	C22 H24 O7	401.159	330.109	6.39685	15.7627	ND	16.6585	16.1164	14.5033	18.3202
SDW04025	2-(4-chlorophenoxy)-N-(2-oxo-3-azepanyl)nicotinamide	C18 H18 Cl N3 O3	360.105	228.063	4.50543	ND	ND	ND	15.5552	21.7739	ND
SDW04050	2-[3,5-Dichlorophenyl]-4,6-bis[trichloromethyl]-S-triazine	C11 H3 Cl8 N3	457.793	280.654	11.0823	23.6212	24.6294	24.4458	13.7337	ND	17.94
SDW04052	Unknown	C36 H63 N O2	542.492	262.252	12.425	17.2138	20.2417	21.5712	ND	ND	13.8186
SDW04059	(6E,10E,14E,18E)-2,6,10,19,23-Pentamethyl-2,6,10,14,18,22-tetracosahexaene	C29 H48	397.382	95.086	12.4292	19.0299	19.9182	17.7621	19.6567	20.1131	19.438
SDW04077	Unknown	C37 H65 F3 O2	599.503	81.0705	13.219	20.5827	21.1358	19.9735	17.1212	15.9276	17.1368
SDW04078	Unknown	C21 H39 F N6 O S	443.297	443.297	10.9478	24.8931	24.0346	24.841	24.7021	24.5174	24.3989
SDW04079	Unknown	C27 H43 F2 N7 S	558.316	104.107	9.49716	19.5465	21.892	16.6422	ND	14.6006	16.6826
SDW04081	Unknown	C19 H39 F N2 O5	395.29	88.0399	10.6808	17.9368	14.163	13.4949	ND	ND	ND
SDW04085	Unknown	C8 H13 F2 N5 S	250.093	136.062	2.79684	16.6082	18.1347	23.8224	18.5662	15.7374	20.7163
SDW04087	Unknown	C15 H23 F4 N O3 P2	426.1	185.042	4.26978	ND	ND	21.3687	ND	ND	ND
SDW04091	Unknown	C26 H59 F4 N9	574.49	574.49	12.5733	19.8449	20.4916	21.5216	26.1027	24.6802	26.0046
SDW04092	miglustat	C10 H21 N O4	220.154	156.138	0.873397	16.1512	20.0706	16.298	16.2562	19.9425	14.4287
SDW04104	Unknown	C28 H54 F2 N2 O3 S	537.391	493.401	12.1871	ND	ND	ND	15.8254	ND	ND
SDW04107	Diundecyl phthalate	C30 H50 O4	497.36	104.107	10.9445	25.5531	26.2773	25.4487	19.9201	19.5917	22.8008
SDW04112	Unknown	C30 H71 N10 O5 P	683.542	353.266	11.283	21.2068	19.9884	20.7583	18.9929	18.9409	19.441
SDW04120	Unknown	C12 H23 F N2 O3 S	295.15	70.0659	0.716892	ND	13.3061	14.3462	13.5701	21.6413	ND
SDW04124	Unknown	C28 H52 F O6 P3	619.285	283.018	11.342	21.6997	22.8862	23.3103	17.0496	18.8348	22.9412
SDW04128	3,4-DMMC	C12 H17 N O	214.12	141	7.06871	21.3571	22.1766	21.8829	22.1929	22.3611	22.3541
SDW04135	Unknown	C23 H49 F Fe N8 O2	543.341	543.341	11.419	25.6616	26.6058	23.9599	21.1884	21.1162	21.831
SDW04157	AL 8810	C24 H31 F O4	425.214	365.193	10.2257	21.262	20.8187	18.2695	21.1554	21.0202	20.9093
SDW04159	Unknown	C35 H66 F2 O4 P2 S	705.402	543.35	11.6971	ND	ND	ND	ND	ND	ND
SDW04172	Unknown	C10 H10 Cl N4 O2 P	285.03	261.03	0.575509	18.3509	13.6512	19.6787	20.4736	20.1588	20.6149
SDW04174	trans-beta-Nitrostyrene	C8 H7 N O2	150.055	95.0496	4.23275	ND	ND	20.9071	ND	ND	ND
SDW04177	Xanthine, 7-methyl-1,3-di-n-propyl-8-[2-[3,5-dimethoxyphenyl]ethenyl]-	C22 H28 N4 O4	413.22	353.199	9.56348	20.0527	17.5752	15.3251	ND	ND	ND
SDW04182	Nuarimol	C17 H12 Cl F N2 O	315.07	153.018	2.88887	13.4121	14.4693	ND	24.1726	13.9521	14.6648
SDW04183	Unknown	C18 H38 F4 N O3 P3 S	518.18	167.07	3.02919	15.0578	14.528	22.2923	15.5723	ND	19.6381
SDW04185	Unknown	C8 H22 F N7 O4 P2	362.127	178.032	0.853801	ND	ND	ND	13.6219	13.6093	20.154
SDW04206	Eglumetad	C8 H11 N O4	186.076	138.055	0.754955	18.6952	20.8289	19.7737	14.9051	17.5977	13.7303
SDW04207	Unknown	C11 H29 F2 N9 O5 S3	502.148	153.054	2.8597	18.3266	14.1025	21.3541	15.8879	ND	21.6954
SDW04223	Unknown	C9 H3 F2 N S	196.002	72.4681	0.807177	17.1123	16.9394	19.5884	17.0391	17.1351	18.042
SDW04235	Unknown	C21 H48 N6 O5	487.36	104.993	11.1322	21.7406	21.7605	21.9333	20.3193	17.7157	22.1089
SDW04236	NP-000587	C16 H18 O8	339.107	147.044	3.22836	ND	ND	20.5722	ND	ND	ND
SDW04245	4-Ethylbenzaldehyde	C9 H10 O	135.08	103.055	7.1722	ND	13.8148	14.8357	ND	ND	22.1696
SDW04263	Unknown	C27 H27 F N2 O7 S	543.16	146.06	6.02129	ND	ND	22.0981	ND	ND	ND
SDW04276	Unknown	C19 H29 F5 N O3 P	446.186	104.071	0.741914	16.9475	17.107	20.1719	21.1792	17.8974	20.9299
SDW04278	Unknown	C16 H31 F3 N4 O8	465.217	301.211	11.5705	24.6836	23.8121	23.9856	24.8923	25.0974	25.1144
SDW04311	Unknown	C18 H23 F2 N2 O7 P	471.11	427.121	4.31214	ND	ND	21.2393	ND	ND	ND
SDW04316	Unknown	C29 H63 N10 O P	599.503	81.0704	13.212	20.5778	21.1829	19.9765	16.4477	16.109	16.6467
SDW04318	Unknown	C8 H5 Cl F N2 O7 P	326.956	313.204	11.571	20.065	20.6959	20.8045	19.152	19.4073	19.9235
SDW04324	Unknown	C28 H49 F N6 O3	537.391	493.401	12.1942	ND	ND	ND	16.0625	ND	ND
SDW04326	THREO-SPHINGOSINE, (-)-	C18 H37 N O2	322.271	322.271	11.6423	24.6428	26.1552	25.72	22.0899	21.1305	23.4763
SDW04328	Unknown	C28 H55 Br F2 S	541.325	541.325	11.0257	24.3226	21.829	27.3028	23.0381	18.3695	22.7421
SDW04341	Unknown	C5 H5 F4 N2 O6 P S3	392.906	136.94	0.6276	20.5147	20.1381	18.6495	20.9579	20.443	18.973
SDW04342	2-Oxiranylmethyl (9Z,12Z,15Z)-9,12,15-octadecatrienoate	C21 H34 O3	335.257	67.055	10.3429	15.6339	15.5699	15.7543	16.3197	14.975	20.2278
SDW04344	N-{4-[(2R,3R)-3-(Hydroxymethyl)-4-isopropyl-5-oxo-2-morpholinyl]phenyl}-2-methoxyacetamide	C17 H24 N2 O5	375.125	199.094	3.76723	20.2707	19.664	19.4989	ND	14.1193	20.7743
SDW04351	1,3-Thiasilinane	C4 H10 S Si	119.086	91.0548	8.84547	15.5448	19.1319	17.7029	19.3703	19.07	19.6711
SDW04358	Cyclohexamide	C15 H23 N O4	281.099	136.062	3.07393	18.5176	15.1139	23.6252	16.7833	17.063	21.1233
SDW04362	Unknown	C4 H9 F4 N6 O P	265.059	265.059	0.594109	22.3845	21.7827	24.0754	23.7574	23.1283	23.7935
SDW04364	Unknown	C7 H11 Cl F2 N6 O4	317.056	261.03	0.58614	15.8293	13.7752	17.1574	17.8233	17.7163	17.8848
SDW04365	Unknown	unknown	104.043	60.0816	0.690624	25.9101	26.0472	26.2322	22.6462	23.9497	23.7498
SDW04366	Unknown	C36 H41 F3 O S	579.292	301.141	9.72357	17.8958	19.2284	14.3472	19.0773	19.0307	19.3275
SDW04367	Unknown	C30 H30 N3 O5 P S	576.171	207.065	6.55346	ND	ND	23.2203	ND	ND	ND
SDW04369	Unknown	C2 H6 F N2 O5 P	189.007	70.0658	0.70218	19.7857	19.6014	22.0945	25.619	23.3196	22.3714
SDW04374	Unknown	C23 H43 F2 N O4 P2	498.271	438.25	9.67828	20.8831	21.9004	14.5513	21.0025	19.6905	22.9594
SDW04378	Unknown	C28 H42 F2 N6 O P2	579.292	301.141	9.72087	17.9208	19.0427	14.281	19.0354	19.0218	19.3618
SDW04384	Unknown	C18 H18 F2 N4 O4 P2	455.085	98.9757	4.01231	19.3642	ND	18.3701	16.3109	17.8175	19.9714
SDW04388	Unknown	C24 H47 F3 N O5 P	518.321	104.107	10.9434	27.2871	27.9145	26.7653	22.1491	22.0281	24.8835
SDW04390	Unknown	C5 H11 F2 N5 O	196.1	196.1	0.865758	19.2979	20.6546	19.0365	19.2286	19.2694	20.074
SDW04404	Unknown	C20 H36 F N O2 S3	438.196	438.196	8.83271	20.4312	23.2001	22.5294	23.3521	23.1667	23.6306
SDW04411	4-decyl-3-hydroxy-5-oxooxolane-2,3-dicarboxylic acid	C16 H26 O7	353.156	203.052	4.68458	ND	ND	ND	19.5716	ND	ND
SDW04413	Unknown	C27 H33 F3 O11	591.204	232.07	5.22316	ND	ND	22.2256	17.2359	18.304	13.7918
SDW04421	PAF C-18:1	C28 H56 N O7 P	550.386	104.107	11.4645	21.0016	21.4299	20.4722	ND	14.4251	18.4471
SDW04437	Unknown	C17 H19 F4 N5 O3 S	450.124	344.097	4.24732	17.0743	ND	15.3365	ND	19.8058	ND
SDW04440	Unknown	C21 H34 N10 O	443.298	443.298	10.9636	24.8728	24.0982	24.8411	24.7956	24.6388	24.5251
SDW04443	Unknown	C H2 F N5 O2	136.027	136.027	0.874326	25.4282	25.0554	28.2144	23.6074	25.488	26.306
SDW04444	Palmitoyl Serinol	C19 H39 N O3	330.3	330.3	9.84386	23.9918	23.9696	21.5185	22.9216	23.2157	23.7326
SDW04447	Scutellarein 4'-methyl ether 7- (2",6"-diacetylalloside)	C26 H26 O13	547.144	547.144	0.749383	22.5413	21.5603	23.6813	23.7186	21.7093	24.4794
SDW04453	Unknown	C21 H43 F N6 O2	453.333	187.036	12.3373	14.6875	18.917	18.7426	13.6351	21.2136	15.8079
SDW04454	Unknown	C15 H14 O7	307.081	139.039	3.3752	ND	ND	ND	14.0971	23.267	19.9116
SDW04455	Ascorbyl palmitate	C22 H38 O7	415.268	57.0707	10.9402	ND	ND	16.8836	ND	ND	ND
SDW04457	Unknown	C19 H28 F N2 O3 P	400.217	110.072	4.66952	ND	ND	13.4018	ND	ND	23.0005
SDW04464	Triptolide	C20 H24 O6	361.164	181.086	5.62093	ND	ND	ND	20.8056	15.3543	ND
SDW04473	Unknown	C21 H53 N7 O10 P2	626.34	104.107	11.051	22.5781	24.0087	22.9388	18.6235	16.244	20.2
SDW04483	Unknown	C20 H42 N2 O	327.336	72.0815	9.99682	15.8107	22.7337	16.5723	17.1292	16.9017	17.8827
SDW04489	Unknown	C14 H13 N7 O3 S3	424.032	322	3.10614	ND	ND	20.6928	ND	ND	ND
SDW04491	Unknown	C7 H18 Br F N4 O3 S	337.034	70.0658	0.718094	16.5812	15.7468	17.0014	21.2557	25.6929	18.1609
SDW04497	Unknown	C20 H39 Cl F2 N2 O2	413.274	175.045	11.278	22.9165	21.7916	22.4972	21.9081	21.6734	21.6199
SDW04508	(2R,3R,4S,5S,6R)-2-{[(2E,6R)-6-hydroxy-2,6-dimethylocta-2,7-dien-1-yl]oxy}-6-(hydroxymethyl)oxane-3,4,5-triol	C16 H28 O7	355.172	203.052	5.41114	ND	ND	16.1595	20.6956	ND	15.4925
SDW04516	Unknown	C28 H35 F3 O10	589.225	379.136	7.56326	ND	ND	ND	14.4896	ND	22.4535
SDW04517	Unknown	C28 H53 O2 P S	485.359	133.101	10.7195	22.6676	21.6465	22.5357	23.5073	23.461	23.5151
SDW04520	Unknown	C27 H45 F N3 O6 P S2	622.255	72.0815	0.768392	20.5885	16.3903	19.3029	15.5745	14.1017	17.5994
SDW04525	Dihomo-γ-linolenic acid ethyl ester	C22 H38 O2	341.305	57.0707	11.6858	21.5158	21.373	21.3385	20.9274	21.1464	21.0285
SDW04530	Unknown	C9 H13 F2 N9 O5	366.108	366.108	0.749489	21.0301	23.6286	25.44	24.8215	24.5103	24.829
SDW04531	Unknown	C26 H40 N4 O13	617.266	437.203	11.899	23.8499	22.9804	19.7626	18.7348	18.9114	23.5872
SDW04532	Dibutylsulfamic acid	C8 H19 N O3 S	210.115	164.07	0.793625	16.1282	14.1571	14.2455	15.7568	16.2608	22.5567
SDW04542	28-Nitrosospirosol-5-en-3-ol	C27 H42 N2 O3	443.326	188.07	11.3489	22.7004	17.0462	17.2236	ND	ND	ND
SDW04545	Unknown	C32 H50 O S2	515.338	515.338	12.0248	22.4281	23.1257	21.7747	22.9146	23.1894	22.9309
SDW04547	(12Z)-9,10,11-trihydroxyoctadec-12-enoic acid	C18 H34 O5	353.229	353.145	8.54813	22.0663	25.5626	21.9405	17.6136	17.0513	20.2687
SDW04549	Unknown	C19 H23 F O11	469.113	131.049	5.21135	ND	ND	14.1004	16.728	15.8395	19.3702
SDW04552	Unknown	C26 H51 F3 N5 P S3	618.307	104.107	10.7405	23.515	24.0371	22.1471	14.9222	18.0166	19.3182
SDW04558	Unknown	C46 H23 F	595.185	595.185	5.86409	16.3943	16.3151	23.186	14.0284	15.4185	16.7529
SDW04561	Unknown	C19 H25 F O8 S	433.133	185.081	4.38597	20.5032	ND	16.0726	16.5181	ND	ND
SDW04569	Unknown	C12 H25 F5 N4 O4 P2	447.133	261.055	2.50717	20.8784	14.923	16.2119	13.8816	13.6376	18.7629
SDW04571	AL 8810	C24 H31 F O4	425.214	365.193	10.2247	21.303	20.9686	17.9207	21.3465	21.1943	21.0398
SDW04579	Unknown	C16 H35 F N6 O2	385.271	80.9484	11.703	17.6582	18.0541	17.8304	15.2307	14.7858	16.4674
SDW04597	NP-014796	C20 H20 O4	347.13	301.126	3.49056	22.426	23.3543	ND	14.4635	18.0869	15.165
SDW04614	Unknown	unknown	78.9977	63.9985	0.818721	26.9871	27.2672	25.3834	25.6929	25.8312	24.2593
SDW04619	Unknown	C26 H35 N O15	602.207	130.065	4.10161	ND	ND	19.7348	ND	ND	ND
SDW04620	[Similar to: (2R,3R,4S,5S,6R)-2-{[1,7-bis(4-hydroxyphenyl)heptan-3-yl]oxy}-6-(hydroxymethyl)oxane-3,4,5-triol; ΔMass: -304.2095 Da]	C4 H4 F N4 P	159.023	98.9758	0.580288	23.3356	23.2288	21.7958	24.6035	24.6762	22.8137
SDW04626	C14-Dihydroceramide	C32 H65 N O3	534.485	256.263	11.2646	20.7482	21.9644	19.5093	21.5878	21.4297	22.3621
SDW04634	Unknown	C17 H46 N10 O4 S2	519.324	519.324	10.9307	28.0006	28.7834	27.6994	23.6061	23.097	26.0382
SDW04651	Unknown	C19 H41 F3 N6 O2	443.334	443.205	10.9725	24.6761	23.7322	24.6956	24.7501	24.6167	24.4754
SDW04658	Unknown	unknown	118.979	101.009	0.568747	23.311	20.6401	24.1572	24.3877	23.9924	24.5416
SDW04661	Unknown	C40 H69 F3 N5 O2 P	740.521	599.503	13.0642	19.1161	22.4041	19.6009	23.5212	20.6069	19.8552
SDW04670	NP-011548	C18 H34 O3	281.247	69.0706	11.362	21.7829	22.8836	21.903	15.6886	17.1029	19.91
SDW04672	Unknown	C6 H9 F3 N O P	200.044	98.9758	0.579912	18.6922	18.8989	14.4404	20.3844	19.9782	18.322
SDW04689	Octylamine	C8 H19 N	130.159	130.159	2.96948	ND	19.262	26.5109	18.6632	21.4818	20.4589
SDW04694	Unknown	C16 H27 N2 O P	295.194	56.9656	11.5575	21.7769	22.3734	22.2803	21.1605	21.2581	21.7264
SDW04701	Unknown	unknown	119.069	119.069	2.49458	24.5274	21.0437	23.0957	21.552	21.7557	23.7329
SDW04723	Unknown	C32 H62 F2 O5 S	597.433	597.433	12.2418	25.9545	26.4142	24.7446	25.832	24.0738	25.9522
SDW04726	Dibutyl Phthalate	C16 H22 O4	279.159	279.159	11.5446	22.4851	22.9918	23.02	21.782	21.8693	22.3347
SDW04727	Unknown	C24 H31 N7 O2	450.261	309.242	10.0505	ND	15.2777	ND	14.7033	ND	21.5938
SDW04729	Unknown	C5 H10 F2 O3 S	189.039	70.0658	0.699752	20.0699	19.863	22.1727	25.6868	23.2267	22.3907
SDW04733	Unknown	C40 H76 N O P S	650.546	650.546	14.8089	21.1253	21.37	20.7342	21.2282	21.5957	21.6391
SDW04737	Unknown	unknown	619.526	619.526	14.1894	27.311	27.5331	27.4242	27.0651	27.7529	27.6235
SDW04739	Unknown	C15 H22 F2 N2 O	285.178	285.178	11.5585	22.1897	22.3125	21.9633	21.5867	21.5597	22.0965
SDW04740	3,5-di-tert-Butyl-4-hydroxybenzaldehyde	C15 H22 O2	235.169	57.0707	9.35582	17.3573	18.1114	17.9432	18.1551	18.0967	18.4749
SDW04742	N-Hydroxyphthalimide	C8 H5 N O3	164.034	164.034	2.6852	18.0593	16.0815	23.671	15.886	18.4216	16.803
SDW04745	Unknown	C19 H34 N9 O10 P	580.223	106.065	3.23437	ND	ND	ND	ND	22.8163	ND
SDW04750	5-Methoxy-2-[(3S)-1-(1-methyl-4-piperidinyl)-3-pyrrolidinyl]-1H-benzimidazole	C18 H26 N4 O	337.204	319.194	10.4076	21.2069	22.6038	19.385	16.4	15.8679	18.4091
SDW04753	1,2:5,6-Dianhydro-3,4-dideoxy-1-[12-(5-methyl-2-oxo-2,5-dihydro-3-furanyl)dodecyl]-6-[(3Z)-3-tetradecen-1-yl]hexitol	C37 H64 O4	573.487	81.0704	12.6092	14.9589	15.3734	17.6778	21.5485	20.4159	21.7662
SDW04756	2-(hydroxymethyl)-6-{5-[3-(hydroxymethyl)-5-(3-hydroxypropyl)-7-methoxy-2,3-dihydro-1-benzofuran-2-yl]-2-methoxyphenoxy}oxane-3,4,5-triol	C26 H34 O11	545.199	515.186	5.60922	ND	ND	13.5037	20.4517	17.9002	ND
SDW04758	Unknown	C30 H24 N3 O6 P	554.147	392.094	3.25187	ND	ND	26.9718	16.1636	14.0734	ND
SDW04768	Unknown	C18 H31 F3 N4 O8	489.217	325.211	11.4431	25.9837	25.6434	25.5945	22.3517	23.2924	25.3512
SDW04776	Unknown	C19 H39 F5 N10 O3 S4	679.208	679.208	6.68462	27.7704	26.7042	26.9246	27.1015	27.0147	27.0153
SDW04789	O-(3-Carboxypropanoyl)homoserine	C8 H13 N O6	220.081	156.138	0.861437	17.368	20.4547	17.3756	18.0078	19.5821	14.2684
SDW04793	6-Methyl-1,2,4-triazine-3,5-dithiol	C4 H5 N3 S2	160	132.081	1.59093	18.5471	19.7389	16.111	ND	ND	28.0063
SDW04800	Unknown	C2 H4 Cl F N2 O4	174.991	70.0659	0.702055	24.7655	24.1226	24.7774	29.9195	30.4747	26.2578
SDW04805	Unknown	C21 H27 N O3 P2 S	436.126	185.027	2.27198	ND	ND	ND	ND	15.1231	19.8519
SDW04815	NI3400000	C5 H6 N2 O	111.056	111.056	0.587308	21.248	18.7639	21.7239	22.0327	21.9934	22.4263
SDW04816	Unknown	C5 H13 O P	121.078	121.078	1.71125	24.2322	22.9368	27.8988	25.3419	27.0941	26.4792
SDW04818	Unknown	C10 H5 N O3	188.034	132.044	2.49615	24.1963	19.8498	22.09	20.3357	19.0307	22.8775
SDW04822	Unknown	C22 H45 F N O9 P	518.289	459.247	10.9384	28.7281	29.1387	28.224	24.0615	23.9403	26.7417
SDW04828	Unknown	C41 H72 F2 O5	683.542	353.266	11.2704	20.9258	19.9848	20.7271	19.0786	18.7658	19.3074
SDW04850	Unknown	C29 H44 N2 O3	469.342	188.07	11.4246	21.6738	17.2529	15.9231	ND	ND	ND
SDW04854	Unknown	C4 H5 Fe N O2	153.979	137.06	0.852757	ND	ND	16.1523	13.7873	16.2524	27.8173
SDW04861	Unknown	C5 H5 F N O8 P	257.981	104.107	0.756254	24.3584	27.2245	21.2251	18.4076	18.7561	21.5005
SDW04863	2'-alpha-mannosyl-L-tryptophan	C17 H22 N2 O7	367.149	146.06	2.62983	20.4959	15.3502	19.0096	17.3527	18.7744	17.998
SDW04883	4698688	C13 H17 N O4 S	284.095	131.049	3.99538	ND	ND	ND	ND	ND	17.703
SDW04886	Unknown	C8 H17 F2 N O2 S	247.128	247.128	0.851283	22.3927	22.2552	22.3575	21.4506	22.7838	20.8553
SDW04887	Unknown	C17 H31 F N2 O11	459.2	104.993	11.5594	21.3681	20.4309	20.773	20.9592	21.1632	21.119
SDW04890	Unknown	C32 H29 N O P2 S	538.153	376.1	3.72544	13.4471	18.4245	27.0428	14.0566	ND	14.1786
SDW04891	Unknown	C23 H39 N O8	480.256	367.172	7.82522	ND	ND	21.3367	ND	ND	ND
SDW04892	Unknown	C2 H2 F N3 O2	120.02	74.0607	0.764564	20.3207	20.5478	22.5363	21.9019	22.4818	21.4065
SDW04896	Zearalenone	C18 H22 O5	301.141	300.962	0.574939	20.6028	19.5727	20.4745	22.3276	22.1269	21.24
SDW04914	Unknown	C27 H49 F N2 O2 S	485.359	133.101	10.7124	22.4178	21.407	22.4151	23.5898	23.5416	23.5465
SDW04915	Unknown	C18 H36 F6 N6 O12 P2	705.184	705.184	0.748547	28.4739	26.1985	28.2183	27.7437	25.8085	27.45
SDW04923	Unknown	C11 H4 F N5 O3	274.038	98.9757	5.21746	13.7249	18.6152	19.8093	ND	13.5121	ND
SDW04929	Unknown	C17 H34 F6 N7 O P	498.256	498.256	10.9328	26.2268	27.0705	26.5143	23.9382	22.7413	25.6103
SDW04930	Unknown	C18 H39 F2 N4 O12 P	573.236	573.236	12.592	18.9904	20.1001	21.6033	26.2033	24.9882	26.2456
SDW04931	1913256	C18 H30 O	263.236	104.993	11.3663	22.0715	23.1158	22.142	19.3099	19.7076	21.3019
SDW04933	Unknown	C22 H48 N2 O2 P2 S	467.298	467.298	10.8429	20.2599	21.2577	22.8718	18.6578	18.3626	19.9457
SDW04945	4-Amino-N-(2-{4-[2-oxo-2-(6-oxo-5,6-dihydro-11H-pyrido[2,3-b][1,4]benzodiazepin-11-yl)ethyl]-1-piperazinyl}ethyl)butanamide	C24 H31 N7 O3	466.258	466.258	10.8458	20.0391	19.1803	23.0775	18.7612	19.8186	20.5855
SDW04946	Unknown	C22 H45 F N O12 P	566.276	104.107	10.3543	17.2706	23.2385	ND	14.2329	13.4793	15.5798
SDW04960	Unknown	C17 H36 F4 N O2 P3 S	488.169	137.06	2.92401	14.4713	ND	20.0913	ND	ND	19.2012
SDW04969	(2R)-3-(Docosanoyloxy)-2-hydroxypropyl 2-(trimethylammonio)ethyl phosphate	C30 H62 N O7 P	602.415	104.107	12.0684	19.0216	20.9563	17.9563	ND	15.7	16.1343
SDW04976	Unknown	C18 H41 F N6 S2	425.289	425.289	10.8115	21.8535	22.5014	22.0293	21.9351	23.6973	21.9118
SDW04980	Unknown	C31 H35 N10 O5 P3	721.208	162.055	5.01595	ND	ND	23.6482	ND	ND	ND
SDW04981	Unknown	C9 H18 Cl F4 N3 O2	312.11	86.097	0.915479	ND	ND	17.8544	18.1704	22.2126	20.9603
SDW05010	Unknown	C11 H21 N7 O2 S2	348.128	136.062	0.869864	22.6898	21.0214	27.8271	24.671	24.56	25.4233
SDW05020	Unknown	C10 H20 F N9 O15 P2	588.061	588.061	0.871019	19.6738	20.9124	20.4558	20.0844	19.6078	20.8647
SDW05029	pyrrolizidine	C7 H13 N	112.112	112.112	0.835057	22.6298	22.2533	22.9336	21.1696	22.7413	21.9738
SDW05032	Unknown	C7 H12 F5 N8 O14 P S	590.992	590.992	10.5368	22.7064	24.2334	17.9888	21.4963	21.6286	22.3434
SDW05033	Tetramethyl 3,12-dimethyl-6,9-dihydrobenzo[c]pyridazino[1,2-a]cinnoline-6,7,8,9-tetracarboxylate	C26 H26 N2 O8	495.175	130.065	6.79031	ND	ND	20.7421	ND	ND	ND
SDW05034	QJ4750000	C10 H8 O2	161.059	161.059	4.69836	16.7858	14.3275	19.7989	22.3829	16.2587	23.3769
SDW05052	Unknown	C18 H28 F3 N O9	460.181	195.101	6.34631	ND	ND	ND	17.9609	ND	20.0391
SDW05058	3',4'-Methylenedioxyfurano [ 2",3":6,7 ] aurone	C18 H10 O5	307.06	146.06	3.28851	ND	14.3993	22.8968	ND	16.0518	ND
SDW05066	Unknown	C26 H28 F4 N2 O2 S	531.168	347.095	3.38446	21.6711	15.3475	18.7375	ND	ND	ND
SDW05068	Unknown	unknown	696.221	696.221	0.581369	18.4537	15.2663	21.4324	21.7514	21.6952	21.9912
SDW05081	Unknown	C14 H34 N8 O S	363.265	321.227	11.2972	21.0609	22.2378	21.8419	19.2335	14.5886	17.8531
SDW05083	Unknown	C10 H17 F5 N2 O10 P2 S	515.007	350.258	11.2705	23.8591	22.0112	23.1854	21.2936	21.3835	21.8876
SDW05088	Unknown	C19 H25 F6 N O5 S3	558.087	275.992	0.813527	20.457	19.4163	18.634	20.3792	19.3736	20.0755
SDW05096	Unknown	C3 H2 N3 O4 P	175.985	98.0605	0.743067	20.3078	18.2621	18.0286	19.2874	20.5484	19.0424
SDW05099	LysoPC(18:3(9Z,12Z,15Z))	C26 H48 N O7 P	518.324	184.073	10.3111	23.023	23.3668	24.764	21.9326	22.1302	26.1476
SDW05103	Unknown	C16 H38 N7 O5 P	440.276	104.107	9.59235	16.406	20.8772	ND	ND	ND	13.6653
SDW05109	6-{3-[(3,4-dimethoxyphenyl)methyl]-4-methoxy-2-(methoxymethyl)butyl}-4-methoxy-2H-1,3-benzodioxole	C24 H32 O7	471.183	234.086	4.48212	13.3116	ND	15.0634	14.1957	21.1958	15.1516
SDW05112	Ethyl 3-acetoxy-2-(trifluoromethyl)-3-butenoate	C9 H11 F3 O4	241.068	69.0342	4.86519	15.6732	15.1076	ND	14.1492	ND	ND
SDW05114	Okanin 4-methyl ether 3'-glucoside	C22 H24 O11	487.121	185.042	5.41473	ND	ND	21.0317	ND	ND	ND
SDW05126	Unknown	C22 H48 F N10 O2 P	535.375	491.385	11.9861	13.4502	ND	ND	16.2396	ND	ND
SDW05135	N-(Bicyclo[2.2.1]hept-2-yl)-4-methylbenzenesulfonamide	C14 H19 N O2 S	266.12	147.044	2.91026	ND	ND	21.826	ND	ND	ND
SDW05137	Unknown	C26 H51 N O6	496.36	104.107	10.9372	27.7289	28.4906	27.6025	22.2987	21.8607	25.0565
SDW05138	1,9-Dihydroxy-2-(3-methyl-2-buten-1-yl)-6H-[1]benzofuro[3,2-c]chromen-3-yl hexopyranosiduronic acid	C26 H26 O11	515.154	177.054	6.79571	16.0898	18.7392	23.2867	ND	ND	24.0657
SDW05140	Unknown	C16 H30 N6 O	323.255	323.255	11.6219	21.6225	22.555	22.166	20.1302	20.0607	20.9439
SDW05142	(2S)-N-[(2S,4S,5S)-5-Formamido-4-hydroxy-1,6-diphenyl-2-hexanyl]-3-methyl-2-(2-oxotetrahydro-1(2H)-pyrimidinyl)butanamide	C28 H38 N4 O4	495.296	147.044	3.6622	15.5326	13.8846	25.1398	17.9128	16.4657	15.4978
SDW05144	Unknown	C20 H40 F6 N4 O8	579.28	579.28	11.5395	24.922	25.4713	25.3559	23.366	23.4899	24.491
SDW05145	Unknown	C19 H28 F2 N4 O12	543.174	483.153	4.63789	14.0177	16.2451	16.3821	22.4935	16.178	13.4864
SDW05146	Unknown	C27 H50 N6 O5	539.391	507.365	11.6295	20.7193	21.2956	20.8092	20.7502	20.7602	22.0536
SDW05147	Octacosahydro-9,9'-biphenanthrene	C28 H46	383.367	81.0705	12.2754	18.3462	17.9033	16.9928	18.1203	17.2003	17.2194
SDW05150	Unknown	C34 H61 N7 O2	600.495	600.495	12.3979	24.5239	26.6286	23.8214	25.4122	26.8708	25.3946
SDW05153	Unknown	C18 H35 F4 O P3	437.193	303.12	8.84377	17.5913	20.002	19.3479	20.1246	19.9097	20.3652
SDW05155	Testosterone isocaproate	C25 H38 O3	387.289	123.044	11.1076	ND	ND	ND	ND	ND	ND
SDW05157	Unknown	C23 H47 O5 P S	467.298	467.298	11.1397	24.1065	19.4692	23.8568	22.6958	19.8584	21.1527
SDW05158	Di-Î±-linolenin	C39 H64 O5	613.482	613.482	12.3422	18.8459	22.432	23.4952	23.5087	21.936	22.2827
SDW05167	Ethyl 2-acetylheptanoate	C11 H20 O3	201.148	201.148	7.88222	ND	ND	ND	15.1171	21.1941	13.6055
SDW05172	6-O-Isobutyryl-alpha-D-glucopyranosyl alpha-D-glucopyranoside	C16 H28 O12	435.147	273.094	3.07239	ND	15.6055	15.3113	20.328	ND	22.9574
SDW05174	Unknown	C31 H47 N O8 S	594.307	594.307	10.9327	25.7062	26.2294	24.7293	21.0033	20.8188	23.8189
SDW05175	Unknown	C10 H20 F N P2	236.113	236.113	0.758291	23.9662	20.9544	21.8821	17.3341	19.843	18.1322
SDW05176	(2S)-3-(1H-Imidazol-4-yl)-2-({[(3S,4S,5R)-2,3,4-trihydroxy-5-(hydroxymethyl)tetrahydro-2-furanyl]methyl}amino)propanoic acid (non-preferred name)	C12 H19 N3 O7	318.129	95.0608	0.749286	16.3344	13.6686	16.2736	ND	22.2338	19.0672
SDW05178	NP-017382	C22 H28 O6	427.157	265.104	4.70504	ND	ND	ND	23.594	ND	ND
SDW05186	Unknown	C16 H17 F5 N9 O2 P	494.123	494.123	4.35236	19.3283	15.6613	26.5798	14.9509	ND	ND
SDW05197	Unknown	C13 H13 N2 O5 P	309.064	161.059	4.68365	14.151	ND	18.0872	15.8199	13.9978	21.7903
SDW05200	Unknown	C27 H36 F3 N O S	480.257	367.172	7.82786	ND	ND	21.14	ND	ND	ND
SDW05208	Unknown	C6 H17 F N8 O2 P2 S2	379.045	379.045	0.570562	22.2828	19.9195	23.9567	23.9309	22.7922	24.2851
SDW05218	Unknown	C8 H14 F6 N4 O3 P2 S	423.024	320.992	3.10524	ND	ND	23.0044	ND	ND	ND
SDW05223	4-Methylumbelliferyl-α-D-glucopyranoside	C16 H18 O8	339.107	177.054	4.50724	19.5615	24.6193	22.4732	14.6933	16.1078	24.8591
SDW05231	5,7-dihydroxy-2-(4-hydroxyphenyl)-6,8-bis(3,4,5-trihydroxyoxan-2-yl)-4H-chromen-4-one	C25 H26 O13	535.144	481.113	5.71993	21.7596	14.3769	19.1695	ND	ND	ND
SDW05232	Unknown	C17 H36 Fe N6 O4	443.228	188.07	11.3413	22.5149	16.9527	17.0683	ND	ND	ND
SDW05233	Unknown	unknown	159.57	159.57	1.60947	16.8341	18.3726	15.1501	ND	13.915	26.619
SDW05236	(2E)-3-(4-{[(2S,3R,4S,5S,6R)-3,4,5-trihydroxy-6-(hydroxymethyl)oxan-2-yl]oxy}phenyl)prop-2-enoic acid	C15 H18 O8	344.133	147.044	3.3878	14.6029	ND	ND	17.2119	21.4311	ND
SDW05240	N2-Dimethylguanosine	C12 H17 N5 O5	312.13	180.088	2.69853	20.0221	17.435	22.5735	14.039	15.8202	17.2555
SDW05247	Unknown	C36 H67 F3 N2 O6	681.503	325.211	11.3465	20.2843	22.1205	21.8108	15.0445	ND	16.9789
SDW05250	Unknown	C31 H41 F2 N4 O5 P	619.285	439.222	11.5238	22.0719	21.9326	20.8817	14.2518	15.3661	17.3506
SDW05256	5,7-dihydroxy-2-(4-hydroxy-3-methoxyphenyl)-3,4-dihydro-2H-1-benzopyran-4-one	C16 H14 O6	303.086	153.018	5.40876	ND	ND	24.1285	ND	13.4736	15.245
SDW05258	Unknown	C29 H50 N6 O12	675.355	513.303	10.2803	16.6395	16.3421	19.8331	20.1337	14.8422	22.8978
SDW05261	Gly-Lys	C8 H17 N3 O3	204.134	204.134	0.813452	20.8575	23.1162	22.6454	22.9544	23.6992	22.8946
SDW05264	Unknown	C4 H8 N P	102.047	102.047	1.69468	19.4091	18.1668	23.1567	20.9417	22.2969	21.6698
SDW05269	Unknown	C7 H18 N8 O4	279.153	279.153	11.5477	22.7321	23.321	23.2509	21.91	22.0036	22.5559
SDW05270	Unknown	unknown	145.513	85.0289	0.585498	17.0167	14.6817	17.8495	18.2337	17.92	18.0652
SDW05273	Unknown	C7 H19 F N2 O P2	229.103	229.103	0.910696	27.3377	26.5903	25.1472	26.0515	25.0249	24.3509
SDW05274	Unknown	C17 H26 F4 N3 O6 P	476.158	161.06	3.34974	ND	ND	17.142	19.2789	16.6426	19.0846
SDW05278	Unknown	C18 H15 N3 S2	338.079	338.079	0.715715	20.081	20.8414	22.3584	21.9138	26.1978	20.7472
SDW05285	(3R,4R)-3-{[4-(2-Amino-2-oxoethoxy)benzoyl]amino}-4-hydroxy-N-isopropyl-1-azepanecarboxamide	C19 H28 N4 O5	415.188	395.182	7.5832	13.58	17.1876	16.6824	17.1914	17.139	16.9957
SDW05292	Unknown	C17 H37 F6 N7 O4	518.289	518.289	10.926	24.5058	25.1791	23.7642	22.7936	22.9405	22.5452
SDW05293	N,N'-Diphenylguanidine	C13 H13 N3	212.118	119.061	3.96311	16.9492	16.5657	16.3639	16.3106	20.1636	20.6039
SDW05297	Unknown	C16 H45 F N10 O10 P2	619.286	619.286	10.9777	23.659	22.3685	23.1866	23.6303	23.7917	23.6096
SDW05299	Unknown	C27 H12 N2 O2	397.098	397.098	2.69804	15.5495	14.2137	17.693	ND	23.6741	19.8739
SDW05302	Unknown	C6 H3 F N O17 P3 S2	537.811	537.811	10.4389	18.7001	19.3292	19.6527	20.6497	19.6804	22.1421
SDW05303	Unknown	C20 H37 F3 O5	415.268	57.0707	10.9381	ND	ND	17.1845	ND	ND	ND
SDW05304	Unknown	C20 H44 N2 O4 S	409.311	327.226	11.644	24.3077	24.9439	24.8341	21.7913	21.0097	22.9724
SDW05305	Unknown	C22 H36 F N7 O5 S	530.254	530.254	11.7499	18.7897	21.8416	ND	18.6797	19.5504	23.5221
SDW05309	[Similar to: (2R,3R,4S,5S,6R)-2-{[1,7-bis(4-hydroxyphenyl)heptan-3-yl]oxy}-6-(hydroxymethyl)oxane-3,4,5-triol; ΔMass: -304.2096 Da]	C4 H4 F N4 P	159.023	98.9758	0.584281	22.3271	21.4681	20.8654	24.2461	24.2828	22.3296
SDW05317	Unknown	C21 H36 F5 N2 O8 P	571.22	571.22	11.7659	20.4431	23.879	22.1618	20.9885	21.4045	21.7885
SDW05318	Unknown	C2 H6 N O2 P S2	171.965	171.965	0.55825	19.7552	19.3864	21.1788	19.7777	19.9205	21.4398
SDW05329	Unknown	C27 H51 F2 N2 O5 P3	615.305	555.283	10.8154	24.0956	21.188	21.4549	19.1135	16.9854	20.0428
SDW05330	Unknown	C39 H37 F2 N	558.296	558.296	10.7437	24.7308	24.9469	24.1834	22.928	23.1909	23.2119
SDW05331	Biotin l-Sulfoxide	C10 H16 N2 O4 S	261.091	261.091	2.778	22.1833	21.1938	23.8494	22.5031	22.7315	22.6366
SDW05332	Unknown	unknown	704.389	704.389	10.8987	26.1072	22.4814	27.5381	23.0012	17.1894	23.0704
SDW05340	Meprednisone	C22 H28 O5	373.2	147.08	7.58384	17.5049	19.3173	18.8076	19.4298	19.3008	19.3522
SDW05342	Sedanolide	C12 H18 O2	195.138	79.0548	7.17059	ND	ND	19.3868	ND	ND	21.4898
SDW05348	Unknown	C35 H73 N9 O5 S	732.553	184.073	12.7124	22.892	23.4502	24.073	27.5085	22.4773	26.8203
SDW05349	1-Ethyl-6,7-dimethoxyisoquinolin-3-ol	C13 H15 N O3	234.112	177.054	3.32083	ND	ND	22.6819	ND	ND	ND
SDW05352	Unknown	C38 H52 N6 O3	641.417	217.047	12.1253	ND	20.3644	ND	ND	ND	ND
SDW05357	Unknown	C25 H43 F4 N O3	482.324	341.305	11.3886	20.3156	21.7303	21.1146	15.2606	16.6824	19.5903
SDW05359	Hexylresorcinol	C12 H18 O2	195.138	81.0705	7.90984	ND	ND	ND	ND	ND	18.8022
SDW05360	(2S,3S,4R,5R)-4-hydroxy-2,5-bis(hydroxymethyl)-2-{[(2R,3R,4S,5S,6R)-3,4,5-trihydroxy-6-(hydroxymethyl)oxan-2-yl]oxy}oxolan-3-yl (2E)-3-(4-hydroxy-3,5-dimethoxyphenyl)prop-2-enoate	C23 H32 O15	571.163	409.11	4.63609	16.5995	25.6715	25.0953	15.479	ND	19.3183
SDW05366	Unknown	C15 H23 F N4 O	295.194	56.9656	11.5527	21.9114	22.4498	22.4573	21.3138	21.3429	21.7498
SDW05372	Unknown	C31 H46 N6 O2	535.376	491.386	11.9702	ND	ND	ND	16.004	ND	ND
SDW05381	glutaral	C5 H8 O2	101.06	101.009	0.576604	24.5874	22.1987	25.2436	25.5888	25.4902	25.6968
SDW05382	Neosolaniol	C19 H26 O8	383.169	301.211	11.5538	22.3406	22.0565	21.9513	21.8339	22.1058	22.4489
SDW05391	trans-beta-Nitrostyrene	C8 H7 N O2	150.055	56.0503	0.85052	21.9867	21.1749	24.0916	20.5117	21.3027	22.2458
SDW05398	Naringeninchalcone	C15 H12 O5	273.075	153.018	5.32634	ND	ND	22.2172	ND	18.4486	18.5394
SDW05406	Unknown	C19 H39 F N4 O4 S	439.276	357.273	12.2661	21.344	24.1068	22.8265	18.2317	19.6034	19.4774
SDW05408	NP-003251	C27 H34 O12	573.194	177.091	5.87879	ND	ND	21.7235	ND	ND	ND
SDW05414	Unknown	C24 H41 Cl F5 N6 P3	637.229	637.229	0.604698	17.1319	13.9266	21.1678	22.0934	21.9599	21.7376
SDW05416	Unknown	C11 H16 N4 O3 S	285.102	285.102	1.20875	16.9061	ND	ND	18.4588	18.7133	21.0774
SDW05417	Unknown	C42 H66 F2 O5	689.495	689.495	12.0428	22.9849	22.396	22.4778	22.1367	22.3244	22.3482
SDW05419	Unknown	C19 H38 F2 O4 P2 S	463.201	299.195	11.2142	22.7718	23.3961	23.691	23.1611	22.4418	23.9655
SDW05426	5-Allyl-2-amino-6-methyl-4(1H)-pyrimidinone	C8 H11 N3 O	166.097	120.081	1.71137	25.6526	24.5014	29.163	26.6711	28.5229	27.961
SDW05428	Unknown	C14 H16 F6 O7	411.086	411.086	4.80765	19.0826	ND	19.7554	19.2219	23.135	20.5848
SDW05431	Unknown	C5 H2 O5 S	191.996	146.06	4.10794	15.823	17.3991	24.315	ND	13.954	ND
SDW05434	Unknown	C31 H47 F O3	487.359	487.359	10.9579	24.5424	23.5927	24.66	24.4439	24.5394	24.5759
SDW05440	Unknown	C23 H41 F N2 O9	531.27	195.003	11.6319	22.283	22.8377	20.4803	ND	14.7018	16.9821
SDW05449	Unknown	C19 H38 N6 O3	399.307	399.181	10.9622	23.6924	22.8912	23.505	24.0127	23.8458	23.7487
SDW05452	Unknown	C31 H35 F3 N4 O2 S3	649.194	649.194	2.04701	27.9666	18.7048	18.8981	13.4297	19.1451	19.4231
SDW05453	Unknown	C6 H16 F4 N6 O4 S2	377.068	377.068	0.829958	19.6716	18.9956	22.0829	22.2619	23.4858	20.3296
SDW05454	2-Sulfanylethanaminium	C2 H8 N S	79.0445	79.0218	0.82594	29.5004	29.6983	28.0576	28.3265	28.5937	27.0743
SDW05458	Unknown	C23 H46 O3 S2	452.321	311.258	10.5345	18.2706	19.5767	19.5476	21.393	15.1557	21.41
SDW05477	3,4,5-Trimethoxy-N-[2-(3-methoxyphenoxy)ethyl]benzamide	C19 H23 N O6	362.159	192.078	4.4185	ND	ND	ND	ND	ND	21.5407
SDW05478	Di(2-ethylhexyl) phthalate	C24 H38 O4	391.283	149.023	11.7549	20.7734	20.7665	20.1418	20.3	20.0565	20.1328
SDW05482	Unknown	C3 H6 Fe O3	144.979	85.0289	0.579002	23.6315	21.1092	24.4171	24.7259	24.4872	24.7059
SDW05490	4-Nitroaniline	C6 H6 N2 O2	139.05	68.9978	0.82229	18.2732	16.2522	16.6336	22.4351	18.7108	19.1727
SDW05516	Unknown	C36 H72 F N5 O5 S2	738.503	738.503	12.3638	29.218	20.2767	22.1405	26.2943	26.1293	21.9667
SDW05520	Unknown	unknown	103.059	103.059	0.572198	22.9062	21.6116	22.9459	23.7651	23.7408	23.5388
SDW05531	N,N'-(9-Propionyl-9H-purine-2,6-diyl)dipropanamide	C14 H18 N6 O3	319.151	277.129	3.3192	15.3175	19.8434	22.5469	20.2557	17.8841	14.8405
SDW05536	2'-O-Methyladenosine	C11 H15 N5 O4	282.119	136.062	2.65904	22.3444	20.6932	22.7729	17.4675	18.8957	19.9546
SDW05546	Unknown	C19 H39 F2 N O7 P2 S	526.195	122.027	3.21769	ND	ND	ND	22.1267	ND	ND
SDW05559	Unknown	C29 H50 N6 O S	531.386	531.292	10.9763	24.3488	23.3396	24.0224	24.7256	25.0711	24.6688
SDW05575	Unknown	C14 H20 F2 N2 O4 S2	383.09	366.064	2.07481	ND	ND	ND	ND	ND	22.0086
SDW05580	Unknown	C15 H39 N9 O5 P2 S	520.232	373.179	6.60873	ND	ND	14.8126	14.2173	16.6669	21.7813
SDW05589	(2R)-3-{[(2-Aminoethoxy)(hydroxy)phosphoryl]oxy}-2-[(6Z,9Z,12Z,15Z)-6,9,12,15-octadecatetraenoyloxy]propyl (6Z,9Z,12Z,15Z)-6,9,12,15-octadecatetraenoate	C41 H66 N O8 P	732.46	732.46	12.7103	23.4573	24.0315	24.5976	27.8894	22.7733	27.1759
SDW05591	Unknown	C17 H33 N7 O2	368.276	368.276	11.269	24.9532	24.5383	24.6351	24.3299	24.1813	24.1738
SDW05592	NP-005128	C28 H38 O13	605.219	443.166	4.23989	15.2509	ND	16.2731	22.5643	20.7887	16.1268
SDW05598	Unknown	C32 H61 F3 N O6 P	644.426	146.982	11.8424	16.0997	14.8189	16.4452	17.1375	15.4941	21.9735
SDW05605	Unknown	C19 H32 N4 O2	349.259	349.183	3.75736	20.1278	18.8342	25.3612	24.1354	25.3082	21.0596
SDW05607	Tetranor-12(S)-HETE	C16 H26 O3	249.184	193.122	9.46129	17.107	18.0424	17.5534	16.8985	17.0284	18.3509
SDW05615	Unknown	C14 H28 F2 N7 O8 P S	524.149	272.065	0.803146	22.1439	21.5364	20.0125	21.448	20.2909	19.5139
SDW05627	Unknown	C24 H17 N10 O4 P S	573.097	573.097	0.766959	19.1009	20.0023	26.279	21.8906	20.0601	21.1877
SDW05634	6-Chloro-3-methyluracil	C5 H5 Cl N2 O2	161.012	161.012	1.6129	15.5985	19.6784	15.0336	14.5361	14.7308	29.0531
SDW05645	Unknown	C24 H48 F P3	449.302	210.991	11.2653	17.8029	16.8748	18.1377	16.4881	15.7889	16.2371
SDW05646	Unknown	C3 H9 F2 N2 O3 P	191.039	98.9758	0.581416	18.7748	18.2784	17.1741	20.8648	20.8602	18.9176
SDW05648	Unknown	C7 H6 Cl2 F6 O11 P2	512.874	512.874	0.761681	18.1211	18.0757	25.7953	24.8646	22.9596	23.1778
SDW05664	Unknown	C7 H7 Cl N6 O5	291.023	291.023	0.770682	20.3414	20.0909	24.643	26.0265	28.878	23.5848
SDW05665	Unknown	C32 H69 N4 O12 P	733.473	733.473	12.0528	23.1151	23.6541	24.1545	23.4985	23.4532	23.1314
SDW05666	Unknown	C17 H45 F3 N9 P3	526.302	526.302	11.3773	23.8865	24.7344	22.8424	19.3922	20.4496	22.153
SDW05670	NJ2800000	C22 H42 N2 O	351.336	72.0814	9.81249	17.2744	17.9804	17.9038	ND	13.3377	14.9815
SDW05683	Unknown	C8 H25 N7 O2 S4	380.103	380.103	4.22731	15.9995	16.06	25.3656	18.8029	20.9059	21.1947
SDW05691	Unknown	C5 H7 F2 N3 O	164.063	164.063	0.800693	18.0457	19.5158	17.9942	23.3743	19.1819	22.4869
SDW05694	MFCD00059002	C16 H35 N O2	274.274	60.0452	8.42738	19.9044	19.8437	19.2889	20.0934	20.0362	19.7946
SDW05709	Unknown	C36 H72 N7 O2 P S2	730.5	730.5	12.5009	23.2669	24.8046	23.7202	27.0851	23.8791	27.5988
SDW05714	Unknown	C27 H61 N9 O11	688.455	688.455	12.8773	20.2469	21.6123	18.6041	21.1036	21.821	20.6761
SDW05715	C14-Dihydroceramide	C32 H65 N O3	534.486	256.263	11.2633	20.7011	21.9394	19.5566	21.4719	21.3674	22.1146
SDW05720	Unknown	C17 H29 F N4 O4 S	405.198	323.195	11.113	25.219	25.289	25.4642	23.3838	20.3756	25.1382
SDW05721	Z-PRO-OH	C13 H15 N O4	250.107	147.044	4.7655	ND	ND	20.2227	ND	ND	ND
SDW05732	Unknown	C34 H63 N O3	534.487	262.253	12.2484	22.5212	17.1159	23.2532	23.009	23.2636	14.579
SDW05740	Unknown	C13 H29 F N6 O3	337.234	337.234	8.84736	17.9033	25.4422	18.3389	18.6111	19.0299	18.4696
SDW05750	Unknown	C31 H49 O7 P S	619.285	283.018	11.3239	21.5593	22.7527	23.1394	17.3481	18.7912	22.8674
SDW05755	Unknown	C26 H53 N4 O2 P S	517.371	517.371	10.8253	23.8189	23.688	23.6112	24.3514	24.6213	24.4241
SDW05756	Unknown	C17 H38 F5 N9 O3	512.31	512.31	11.2197	22.3818	23.5809	22.3948	22.9686	22.7727	23.5296
SDW05760	NP-021710	C30 H50 O2	425.377	167.07	11.6595	20.7765	13.3497	ND	ND	ND	ND
SDW05763	Betaxolol	C18 H29 N O3	308.222	86.097	7.81694	ND	ND	19.7604	ND	ND	ND
SDW05768	Unknown	C16 H45 N10 O7 P	521.33	521.33	10.733	24.1326	24.7979	23.5039	16.5814	18.8173	19.4047
SDW05779	Unknown	C8 H17 F2 N O2 S	230.102	230.102	0.763533	20.9969	22.4164	21.9242	17.8964	19.504	ND
SDW05785	Pyridoxal	C8 H9 N O3	168.065	69.0706	2.29059	17.9441	18.4377	18.9913	20.3581	18.0035	17.1593
SDW05786	Unknown	C H F3 N O2 P	147.977	84.045	0.768789	22.6387	23.0823	24.003	24.6721	24.2428	21.7324
SDW05792	Unknown	C31 H39 F N O3 P	524.272	524.272	11.3839	27.3576	28.1285	25.7047	18.9861	21.2513	23.6606
SDW05795	[Similar to: L-Tyrosine; ΔMass: -0.0479 Da]	C2 H7 N5 O3 S	182.033	136.076	1.07286	24.1779	23.6796	28.4686	23.8611	24.9783	26.9505
SDW05797	Unknown	C5 H16 F N6 O6 P	307.092	146.06	3.28162	ND	15.0453	23.1726	ND	16.7634	ND
SDW05799	Unknown	C30 H40 O12 P2	655.207	655.207	5.5288	14.8225	13.9311	24.1076	19.1497	16.7513	15.9599
SDW05800	Unknown	C20 H31 F5 N2 O5 P2	537.171	152.07	2.34715	ND	21.7951	ND	ND	ND	ND
SDW05801	Unknown	C19 H28 F4 N6 O9	561.193	185.042	4.75218	ND	ND	20.4535	20.0147	13.7294	ND
SDW05808	Unknown	C17 H29 F2 N2 O4 P3	457.138	457.138	0.715264	20.38	20.0299	25.8059	22.3797	20.8739	22.6621
SDW05809	Unknown	C15 H26 F4 O	299.2	72.0815	9.40775	ND	20.9833	15.1415	17.3339	15.0388	14.9612
SDW05828	Unknown	C20 H47 F N8 O13	627.334	447.271	10.6827	22.5036	22.0364	22.0169	16.6252	14.8345	19.1847
SDW05833	Unknown	C31 H30 O9	547.196	147.044	8.67977	ND	14.6081	21.3479	ND	ND	16.3488
SDW05838	Unknown	C16 H39 F N6 O4	399.307	399.307	10.9626	23.8161	23.2362	23.6523	24.1791	23.9395	23.7942
SDW05839	Unknown	C2 H4 Cl2 F N O2	163.968	55.9352	0.699846	15.4191	15.7098	21.7647	24.0873	ND	21.1627
SDW05844	Unknown	C5 H16 N6 O4	225.131	177.009	0.585929	15.4583	13.8092	16.7937	17.8456	17.3867	17.971
SDW05855	Unknown	C27 H40 F N3 O4 S	522.282	104.107	11.0412	25.498	26.8431	26.4091	21.0037	18.4694	22.9271
SDW05868	OB4520000	C10 H9 N O	160.076	160.076	1.61566	15.259	19.6344	ND	ND	ND	27.512
SDW05871	Unknown	C29 H53 F N4 S	531.386	531.386	10.9762	24.4375	23.5303	24.1938	24.8292	24.9863	24.6173
SDW05874	Prochlorperazine	C20 H24 Cl N3 S	374.144	374.144	3.90623	14.4361	17.5183	19.4285	23.48	19.4247	18.3087
SDW05875	Unknown	C31 H65 F2 N2 O6 P	631.464	631.464	12.3059	25.8678	25.9677	23.1087	18.5944	21.4005	22.927
SDW05878	Unknown	C15 H23 F N4 O4 S2	407.122	98.9757	4.67444	18.8298	16.1356	19.3901	16.4785	14.1714	17.1668
SDW05879	Unknown	unknown	697.659	697.659	12.4015	20.9446	22.0017	20.6442	21.9724	22.5309	21.8305
SDW05883	MFCD00024813	C5 H11 N O4	150.076	56.0503	0.844219	21.6476	20.5045	23.8255	20.1959	21.1458	22.1789
SDW05885	Unknown	C18 H33 F3 O3	355.245	355.245	8.35543	21.3423	22.214	19.227	17.9178	18.1746	18.4683
SDW05890	Unknown	C4 H6 N2 O P2 S	192.975	119.019	0.573444	16.4107	15.073	16.9718	17.4017	17.2091	17.5147
SDW05895	Ro 20-1724	C15 H22 N2 O3	279.17	177.054	3.91166	15.907	14.1201	24.6064	13.5944	14.2749	13.5612
SDW05903	Unknown	C17 H35 F N10 O	415.305	415.305	11.2007	21.7129	21.5454	21.6619	21.4179	21.2129	20.8713
SDW05915	Unknown	C27 H46 F2 O4	473.344	305.156	10.3889	16.5202	15.8056	14.8761	15.9205	16.7667	15.9657
SDW05916	Unknown	unknown	91.0589	91.0589	0.868482	21.1305	21.6233	24.8837	20.7212	22.5061	26.0646
SDW05924	Unknown	C8 H21 N6 O2 P	265.154	177.054	3.50619	16.4652	18.6949	27.2753	13.3869	14.9869	19.9173
SDW05935	NP-014693	C19 H28 O6	335.189	317.178	10.1567	22.6025	23.938	18.1013	15.577	17.1571	21.9575
SDW05937	Unknown	C4 H12 F5 N7 O5 P2	396.034	275.992	0.807229	20.5024	19.882	18.3578	ND	18.7107	19.9365
SDW05963	Cyclohexylamine	C6 H13 N	100.113	100.076	1.95373	21.5287	24.2257	24.5006	20.9957	20.6284	24.7656
SDW05964	Unknown	C27 H42 N10 O6	603.335	423.271	10.8814	21.9624	21.8669	21.7081	20.7977	15.4367	21.4698
SDW05977	Unknown	C7 H15 F2 N3 O2 S	244.092	244.092	0.577692	20.119	18.2055	21.3935	22.5667	22.4157	22.3487
SDW05982	Unknown	C10 H16 F2 N2 O2 S	267.097	267.097	0.583444	20.6451	21.2195	23.0779	22.4864	22.7642	22.6424
SDW06007	Unknown	C30 H38 O2 S	463.266	463.184	10.5819	22.6254	21.3152	21.2844	22.7081	22.3595	22.5201
SDW06010	Unknown	C12 H24 F2 N10 O6	465.172	303.12	4.41883	15.9768	ND	14.7695	23.1836	21.1414	16.3475
SDW06018	Unknown	C24 H50 N2 O11	543.35	104.107	10.7257	25.0091	25.4909	24.0456	16.3501	19.3899	20.5094
SDW06020	Betaxolol	C18 H29 N O3	308.221	86.097	7.8134	ND	ND	19.7774	ND	ND	ND
SDW06021	Unknown	C22 H26 F4 N3 O14 P	664.116	664.116	0.7511	20.3114	18.025	24.9496	20.716	19.0928	19.5172
SDW06025	Parathion	C10 H14 N O5 P S	292.039	130.065	3.40571	ND	ND	21.6778	ND	ND	ND
SDW06029	Unknown	C11 H29 N5 O3	280.235	280.235	9.40008	19.7984	23.8864	24.8642	20.3706	20.6216	24.0892
SDW06032	Unknown	C28 H39 O8 P S	567.219	485.216	11.6744	24.88	25.1991	24.596	23.5717	22.9477	24.5854
SDW06042	4-(4-[2-(4-Ethylcyclohexyl)ethyl]cyclohexyl)-1,2-difluorobenzene	C22 H32 F2	335.255	335.255	10.446	23.6126	24.3656	20.5631	18.7488	16.6939	22.1087
SDW06051	Unknown	C15 H35 F N6 O9 P2	525.2	525.2	0.742171	25.2651	24.142	24.9189	25.0875	23.9776	23.4376
SDW06052	Unknown	C6 H3 F2 N2 O7 P	284.972	284.972	11.5505	21.2854	21.9261	21.3634	21.0232	20.9264	21.0192
SDW06053	Unknown	C39 H63 F2 N	584.501	584.501	13.1787	23.9844	21.8726	17.5269	17.6853	16.7689	18.5657
SDW06061	Meprobamate	C9 H18 N2 O4	219.134	84.045	0.770982	18.0116	20.0263	21.2453	21.9318	19.9234	17.5525
SDW06073	Unknown	C16 H32 F4 N10 O	457.277	457.277	11.1997	25.3447	24.4322	25.1289	24.6423	24.5573	24.4897
SDW06074	Unknown	C16 H33 N3 O3 P2	378.208	378.208	11.1031	27.2965	27.1042	27.5505	21.4687	20.5721	23.1603
SDW06076	Unknown	C10 H22 N2 O5	251.16	72.0815	0.591533	15.313	ND	20.747	15.6145	16.5837	18.3473
SDW06079	Unknown	C35 H72 F3 N3 O5 S	704.521	704.521	13.5809	22.4686	21.9295	22.1281	22.0394	22.0862	22.2983
SDW06081	2-Carbethoxycyclopentanone	C8 H12 O3	157.086	157.086	2.52438	23.1399	18.4069	21.3966	19.4336	16.8219	23.2533
SDW06085	N-{5,6-Dihydroxy-3-[(2-oxo-3-piperidinyl)carbamoyl]-2-cyclohexen-1-yl}nicotinamide	C18 H22 N4 O5	397.146	234.086	3.90266	ND	ND	17.5218	19.577	17.6265	16.8755
SDW06087	N-[(1R,9S)-11-(4-Fluorobenzyl)-6-oxo-7,11-diazatricyclo[7.3.1.02,7]trideca-2,4-dien-5-yl]isonicotinamide	C24 H23 F N4 O2	441.173	397.183	6.22548	ND	ND	ND	20.9738	15.0827	13.9243
SDW06095	Unknown	C14 H33 F6 N9 O5	522.256	522.256	11.0462	23.6481	25.1367	24.4593	19.785	16.9225	21.4558
SDW06104	5'-Deoxy-5'-(methylsulfinyl)adenosine	C11 H15 N5 O4 S	314.091	136.062	1.96327	22.7764	20.6332	21.4834	23.265	20.3753	21.4357
SDW06115	2-Methoxyethyl 4-(3-methoxyphenyl)-6-methyl-2-oxo-1,2,3,4-tetrahydro-5-pyrimidinecarboxylate	C16 H20 N2 O5	322.212	177.055	2.57176	20.9859	18.5219	22.9463	14.9456	ND	18.223
SDW06118	(2S,3S,4S,5R,6R)-6-[3-(benzoyloxy)-2-hydroxypropoxy]-3,4,5-trihydroxyoxane-2-carboxylic acid	C16 H20 O10	395.094	219.062	4.20846	19.223	20.0619	18.3684	ND	ND	14.2983
SDW06120	Unknown	C18 H19 F N4 O5 S2	455.085	98.9757	4.00699	19.3915	ND	18.4431	16.2193	17.5154	20.0125
SDW06123	Unknown	C25 H40 F2	379.318	379.318	11.3554	27.4962	29.4877	29.0709	26.0657	20.6467	23.9925
SDW06137	NP-020903	C20 H25 Cl O7	451.099	177.054	7.7439	15.3476	18.0982	24.0813	ND	ND	16.2175
SDW06138	4-(2-methyl-4-thiazolyl)benzoic acid	C11 H9 N O2 S	220.042	90.0555	2.14968	22.9163	23.3298	23.9357	23.2517	22.0043	23.6008
SDW06148	Unknown	C7 H8 Cl2 N4 O4	282.999	282.999	0.58217	23.0069	21.5431	24.6795	25.3047	24.901	25.4744
SDW06155	Unknown	C14 H39 N9 O9	478.292	478.292	10.9196	24.0321	24.6955	24.0898	19.9352	19.6902	21.7515
SDW06177	Unknown	C13 H30 F N7 O4 S2	432.186	90.0555	0.753204	19.8935	20.291	24.4052	23.2662	19.0933	21.2259
SDW06180	Butylparaben	C11 H14 O3	195.101	120.979	7.17056	ND	ND	16.7257	ND	ND	19.6542
SDW06181	Unknown	C5 H17 F4 N9	280.161	280.161	11.5403	20.9258	21.4336	21.1886	20.2003	20.3097	20.7415
SDW06188	Unknown	C45 H59 F2 O P	685.435	685.435	12.8778	25.6	27.0981	23.4493	26.5159	27.5101	26.2208
SDW06194	Unknown	C9 H22 F3 N10 P S3	455.095	455.095	3.18589	15.6758	14.8581	16.911	24.7011	17.6559	18.6595
SDW06195	Cyclohexyl fentanyl	C26 H34 N2 O	391.281	149.023	11.7593	21.2535	20.9908	20.8175	20.5985	20.5759	20.4231
SDW06200	Indole-3-pyrubate	C11 H9 N O3	204.065	147.044	2.91565	ND	ND	24.1894	ND	ND	ND
SDW06203	Unknown	C14 H32 F3 N10 O5 P S	541.203	459.2	11.5601	24.0748	23.5243	22.6826	25.0147	25.344	25.1559
SDW06204	2,3-Dihydroxy-3,7,11,15-tetramethylhexadecyl nitrate	C20 H41 N O5	376.305	118.05	10.5609	16.2849	16.0903	ND	ND	ND	14.6077
SDW06206	Unknown	C17 H20 N2 O2 S3	381.076	381.076	3.75901	19.7691	17.441	21.5373	19.5154	22.1702	26.1716
SDW06214	Unknown	C20 H35 F4 N2 O3 P3	543.168	381.115	3.17043	ND	ND	20.5062	ND	18.7741	24.8644
SDW06217	Unknown	C18 H29 F3 N6 O4 S	483.2	483.2	11.3589	25.7024	24.9438	25.2282	22.45	22.8018	24.9167
SDW06228	3-amino-4-methoxy-1,2,5-oxadiazol	C3 H5 N3 O2	116.046	116.046	0.806935	24.6522	25.0795	28.7197	25.6276	27.4078	25.6345
SDW06241	Unknown	C7 H18 N3 O2 P S2	289.091	289.091	4.2009	21.7789	20.7394	20.5628	21.352	21.1829	21.7259
SDW06242	Unknown	C27 H64 F2 N9 O4 P	648.489	648.489	12.0561	23.9158	21.8786	22.1095	20.0822	20.2901	22.4016
SDW06245	Unknown	C6 H8 F N4 O P S	235.021	119.019	0.584294	16.9595	14.9863	17.6774	17.7859	17.4772	17.7856
SDW06249	Unknown	C18 H44 F4 N10 O P2	555.316	555.316	9.56645	23.9708	21.537	19.1675	16.2819	15.7474	20.1378
SDW06252	Unknown	C31 H66 N4 O10	655.488	655.488	11.5461	24.2196	24.8742	24.6257	23.945	23.657	24.549
SDW06254	Unknown	C13 H17 F N2 O S3	333.054	333.054	6.14836	16.4288	13.7827	18.7476	17.5273	21.2566	23.0365
SDW06269	3-Chloro-1-propanamine	C3 H8 Cl N	94.0418	94.0418	0.734858	18.6278	21.4897	21.5023	19.6118	21.7277	20.3719
SDW06275	6",6"-Dimethyl-3',4'-methylenedioxypyrano [ 2",3":7,8 ] flavone	C21 H16 O5	349.107	349.107	3.76672	21.2611	21.8064	25.3255	24.2429	24.9595	22.0109
SDW06278	Unknown	C9 H13 F2 N2 O P	235.081	235.081	0.8623	24.6518	18.3106	20.4696	21.2888	21.3104	17.7496
SDW06279	Bracteatin	C15 H10 O7	303.049	303.049	6.01293	17.6684	14.8794	19.2351	19.7941	24.9829	22.7815
SDW06291	Tomatidine	C27 H45 N O2	416.352	175.075	10.4618	ND	ND	ND	15.478	ND	ND
SDW06297	Unknown	C16 H38 N6 S	347.294	123.044	13.8344	ND	ND	ND	15.6538	ND	ND
SDW06302	Unknown	C10 H19 F2 N5 P2 S2	374.06	374.06	0.865906	18.161	20.0199	21.6848	20.3654	21.0756	20.6532
SDW06307	Protocatechuic aldehyde	C7 H6 O3	139.039	121.029	2.89774	15.0801	18.6826	24.3467	17.0937	20.5925	ND
SDW06311	Unknown	C19 H32 F2 O7 S	465.172	303.12	3.80911	ND	ND	15.6695	23.2492	14.6435	21.8422
SDW06312	Unknown	C15 H32 F2 N4 O3	355.251	341.236	11.9507	17.4383	18.5064	18.8972	17.3717	17.8497	17.6018
SDW06316	2,6-Piperidinedicarboxylic acid	C7 H11 N O4	173.985	131.961	0.581926	19.8302	18.7132	19.3248	19.7549	18.8175	22.9639
SDW06319	Unknown	C2 H6 O7	143.019	143.019	2.49569	26.04	22.1548	24.3554	23.2444	22.0391	25.0882
SDW06320	Unknown	C22 H31 F2 N3 O5 P2	518.18	339.1	4.8913	ND	ND	14.4697	13.9346	ND	20.2447
SDW06322	Unknown	C28 H51 F2 N2 O2 P	517.371	517.371	10.3915	22.4557	22.5517	21.5412	22.3475	23.3186	22.8428
SDW06325	Unknown	C22 H40 N3 O9 P	522.257	184.073	10.9419	24.7949	26.8954	27.7261	23.1179	18.9793	23.0195
SDW06339	5'-(furan-3-yl)-4a-hydroxy-2,5-dimethyl-3,4,4a,7,8,8a-hexahydro-2H-spiro[naphthalene-1,3'-oxolane]-2',7-dione	C19 H22 O5	369.115	177.054	3.59982	15.7292	16.2271	21.3266	15.6624	ND	16.743
SDW06340	Unknown	C12 H20 F N O11	374.107	124.039	2.25097	25.4719	25.5398	18.898	15.9021	14.1106	18.3884
SDW06342	Unknown	C16 H34 F2 N3 O2 P	370.243	370.243	11.202	21.1251	20.7133	20.9128	20.7188	20.4404	20.4423
SDW06344	Unknown	C8 H18 F2 N5 O2 P S	318.097	146.06	3.74051	ND	ND	22.8079	ND	ND	ND
SDW06347	Unknown	C22 H33 N4 O2 P S2	481.185	323.195	11.1276	22.9008	22.7905	23.1448	21.1282	18.5725	22.8934
SDW06350	Diethyl nitromalonate	C7 H11 N O6	206.066	84.045	0.751557	16.0419	18.1654	16.7743	17.1847	18.9709	15.6219
SDW06351	Unknown	C28 H54 F N3 O8	580.397	580.397	12.242	19.0697	20.1085	22.4728	17.5186	18.3005	19.0633
SDW06356	NP-020962	C24 H32 O15	583.163	379.099	4.48705	17.6891	18.8722	20.1399	ND	ND	24.0651
SDW06357	3-ureidopropionate	C4 H7 N2 O3	132.053	86.097	0.917629	25.9545	24.4936	28.8862	25.1979	28.0538	29.0249
SDW06366	Nandrolone Decanoate	C28 H44 O3	429.336	429.336	10.363	20.9389	20.1034	19.2693	20.8997	21.5978	21.4119
SDW06372	Unknown	C9 H10 Cl F N6 O8	385.031	98.9758	0.585825	17.3633	15.1292	16.32	20.7849	20.6785	19.0888
SDW06375	2-Ethynylphenol	C8 H6 O	118.065	72.0815	0.780686	21.3075	20.4105	23.7546	21.3699	22.0066	22.6234
SDW06389	Unknown	C32 H31 F O5 S	547.196	147.044	8.68655	ND	14.5857	21.3037	ND	ND	16.4652
SDW06407	Unknown	C17 H25 F2 N5 O3 S	418.17	106.065	2.93036	ND	ND	ND	ND	19.8477	15.0631
SDW06408	Unknown	C7 H10 F N4 O2 P S	265.032	122.071	0.721332	20.6595	22.0336	21.2792	18.6532	20.6484	16.2353
SDW06411	Ramipril	C23 H32 N2 O5	439.222	135.003	11.6595	18.8764	19.0914	19.2793	16.5157	15.2866	17.3371
SDW06417	Unknown	C20 H34 N3 O2 P	380.246	380.246	11.2375	ND	ND	ND	23.2585	22.5934	22.1836
SDW06418	Unknown	C5 H12 F N O2 S	170.065	136.062	1.66107	19.8062	16.9246	21.3958	16.2952	14.5416	17.4696
SDW06422	Unknown	C40 H78 F2 N3 O3 P	718.582	718.582	13.8193	21.8346	21.5959	21.6977	21.7524	21.94	21.8921
SDW06429	1-(4-Dodecylphenyl)-2,2,2-trifluoroethanone	C20 H29 F3 O	343.224	343.224	9.08438	ND	22.3241	14.0811	16.1703	15.8774	16.6218
SDW06443	2,6,3'-Trihydroxy-4'-methoxy-2-benzylcoumaranone	C16 H14 O6	303.086	303.086	6.0127	17.342	15.2041	19.493	19.8431	24.9677	22.7436
SDW06446	Unknown	unknown	57.0342	57.0342	0.57091	20.6615	20.1446	18.9103	21.3959	21.5321	20.0859
SDW06455	Unknown	C28 H43 F O5 S	511.29	511.29	11.1804	24.517	22.6215	21.6231	19.2074	ND	21.6981
SDW06463	N-[(5S,6S,9S)-8-acetyl-5-methoxy-3,6,9-trimethyl-2-oxo-11-oxa-3,8-diazabicyclo[10.4.0]hexadeca-1(12),13,15-trien-14-yl]-2-methoxybenzamide	C27 H35 N3 O6	498.259	177.054	5.46418	16.8967	ND	21.0235	ND	ND	20.6358
SDW06466	Glutaric acid	C5 H8 O4	133.05	119.019	0.559016	17.956	15.5548	18.6257	19.1173	18.95	19.0483
SDW06478	Unknown	C25 H30 N6 O11	591.204	234.086	5.09809	ND	ND	ND	ND	23.3329	ND
SDW06484	3-Methyladenine	C6 H7 N5	150.077	150.077	0.755399	24.317	23.6324	26.1649	22.96	23.7055	24.7128
SDW06485	MFCD00024813	C5 H11 N O4	150.076	150.076	0.749189	24.1789	23.5612	26.1859	22.8516	23.7197	24.7806
SDW06501	Unknown	C36 H63 N7 O3	642.506	337.234	11.8468	21.6319	ND	ND	13.6655	ND	14.0867
SDW06507	Unknown	unknown	730.44	730.44	12.4959	23.0497	24.5703	23.5194	26.8486	23.6389	27.3928
SDW06518	Unknown	C18 H36 F5 N7 O2	478.292	478.292	10.9291	24.2236	24.7347	24.0965	19.9812	19.2309	21.8582
SDW06521	4-{5-[(4-methylphenyl)methylene]-4-oxo-2-thioxo-1,3-thiazolan-3-yl}-N-(1,3-thiazol-2-yl)benzenesulfonamide	C20 H15 N3 O3 S4	337.171	70.0658	0.722314	16.4396	15.5982	17.3996	21.4042	25.7332	18.2443
SDW06531	Unknown	C37 H65 F2 N O	600.495	600.495	12.3959	24.5319	26.7054	23.8379	25.4825	26.9359	25.4427
SDW06532	Ethyl palmitoleate	C18 H34 O2	283.263	57.0707	11.6445	19.8154	22.1534	21.1391	16.8664	16.2898	18.8094
SDW06537	Unknown	C29 H33 F2 N O3 P2 S	576.171	207.065	6.55685	ND	ND	23.2449	ND	ND	ND
SDW06545	Neobanol	C18 H12 O6	325.07	85.0289	0.77586	20.0518	19.9932	19.2582	20.7108	21.8758	20.0164
SDW06561	Unknown	C16 H29 F3	279.229	279.229	11.5454	22.3615	23.3247	22.8647	21.8085	21.8858	22.4425
SDW06563	Unknown	C18 H25 F N6 O2 S2	441.152	177.055	6.83821	17.1678	13.9698	27.5182	14.152	14.4373	14.8408
SDW06565	Unknown	C35 H20 F2 N8 S	623.158	323.073	2.50016	ND	ND	ND	22.1278	15.8219	15.3048
SDW06570	Unknown	C9 H12 Cl N9	282.097	120.081	4.2878	17.2132	ND	19.3144	17.0375	19.7499	19.2208
SDW06575	L-Cysteine	C3 H7 N O2 S	122.027	105.07	2.10712	16.6281	15.5158	16.6006	19.356	ND	24.9257
SDW06576	Unknown	C32 H61 F5 N2 O5 S	681.431	621.409	12.4183	19.0737	20.9058	18.3969	20.4705	21.1536	20.3399
SDW06578	Unknown	C12 H16 F5 N2 O2 P	347.094	347.094	0.810142	20.6229	20.3525	23.3692	23.4404	24.5017	22.0772
SDW06589	Unknown	C10 H18 N6 O9 P2 S2	493.012	329.242	11.9445	24.8227	25.6601	25.4487	24.7299	25.3132	24.7717
SDW06591	Unknown	C5 H15 N6 O4 P	255.097	123.055	0.73254	ND	14.1707	19.466	15.1357	16.8638	20.2226
SDW06600	Unknown	C18 H31 F3 N O9 P S	526.149	526.149	5.00505	19.1622	18.5963	20.9339	19.818	20.6694	19.3621
SDW06601	Unknown	C31 H50 Cl F O9	621.321	621.321	11.3618	25.7121	26.0591	25.6244	19.0425	19.565	22.8121
SDW06602	C20 phytosphingosine	C20 H43 N O3	346.331	346.331	9.24212	20.7817	21.1906	21.6456	21.9189	21.429	21.9123
SDW06618	Unknown	C29 H46 F3 N7	550.386	550.386	11.4814	24.5916	24.8601	24.435	23.0368	23.2196	23.5654
SDW06624	N~2~-(tert-Butoxycarbonyl)glutamin	C10 H18 N2 O5	247.128	72.0815	1.56153	18.535	16.5129	20.4945	20.4315	18.7099	17.519
SDW06627	[Similar to: 2-{2-[(2Z)-pent-2-en-1-yl]-3-{[3,4,5-trihydroxy-6-(hydroxymethyl)oxan-2-yl]oxy}cyclopentyl}acetic acid; ΔMass: -256.2194 Da]	unknown	118.982	91.0547	0.877002	21.5038	21.9913	25.4057	20.8937	22.896	25.0499
SDW06635	methyl (1S)-7-hydroxy-7-methyl-1-{[(2S,3R,4S,5S,6R)-3,4,5-trihydroxy-6-(hydroxymethyl)oxan-2-yl]oxy}-1H,4aH,5H,6H,7H,7aH-cyclopenta[c]pyran-4-carboxylate	C17 H26 O10	413.141	251.089	2.83392	13.8737	ND	15.7366	21.1921	18.3669	15.8453
SDW06645	4-Methylumbelliferyl-α-D-glucopyranoside	C16 H18 O8	339.107	177.055	6.09119	13.9476	22.8815	19.2469	ND	ND	14.4218
SDW06648	Unknown	C42 H39 P S	629.241	629.241	2.64036	19.8759	21.3545	23.8257	20.7497	24.3602	27.3904
SDW06662	Unknown	C18 H42 F3 N9 O10	602.31	455.257	9.10624	16.7853	ND	23.6777	14.9291	13.7177	20.8759
SDW06664	Unknown	C38 H73 F O2 P2 S	675.486	675.486	12.121	25.4612	22.1426	20.9096	19.9044	21.0703	19.2679
SDW06665	Unknown	C19 H41 Cl N O P S	398.24	398.24	9.50473	19.2119	20.5303	20.2519	20.6331	20.5785	20.3002
SDW06667	Unknown	unknown	70.9812	70.9812	0.763944	19.4813	20.2117	22.4242	ND	20.6717	20.6087
SDW06670	Unknown	C12 H18 F2 N3 O2 P	306.118	306.118	3.3169	18.9121	18.9849	20.0188	20.1858	20.1774	18.862
SDW06671	Unknown	C12 H25 N3 O3 P2 S	354.118	146.06	2.19983	ND	ND	22.2532	ND	ND	ND
SDW06680	Unknown	C35 H61 N9 O2 S2	704.447	704.447	11.3688	24.1496	24.4238	24.1438	20.7452	20.5169	23.9724
SDW06687	Unknown	C23 H19 N2 O4 P	419.118	151.039	3.59612	19.5801	ND	13.3746	ND	ND	ND
SDW06728	Unknown	C15 H40 N9 O5 P	458.294	458.294	11.1853	23.7188	23.374	23.7069	23.4718	23.4391	23.649
SDW06732	Unknown	C31 H64 F3 N9	620.533	620.533	14.1889	26.0619	26.2967	26.1849	25.8044	26.515	26.3724
SDW06739	2-Nitrotyrosine	C9 H10 N2 O5	227.067	167.07	2.23831	17.9071	ND	ND	18.3266	15.962	22.1522
SDW06744	spisulosine	C18 H39 N O	286.31	230.248	8.84849	19.3424	20.8902	20.2609	21.3677	21.2965	21.2274
SDW06778	Propyl 10-hydroxy-11-(1-piperidinyl)undecanoate	C19 H37 N O3	328.284	90.0554	11.1631	16.794	15.6163	18.0703	13.7714	13.7922	14.91
SDW06779	Daminozide	C6 H12 N2 O3	161.092	119.019	0.59044	21.0254	19.2294	21.6448	22.1683	22.0016	22.2274
SDW06785	Unknown	C21 H48 F2 N6	423.398	95.086	14.0985	ND	19.0864	ND	ND	ND	ND
SDW06798	T-98475	C37 H37 F2 N3 O4 S	658.253	658.253	0.739468	19.7042	17.4314	21.9652	20.7725	20.2866	ND
SDW06800	Unknown	C19 H40 F2 N6 O2	423.324	165.091	11.8681	17.2368	18.6367	18.1603	14.1252	13.9332	14.4852
SDW06802	ethyl N-acetyl-beta-D-glucosaminide	C10 H19 N O6	250.128	186.112	0.830512	16.5702	ND	19.941	17.713	19.0997	16.8118
SDW06816	Unknown	C22 H33 F3	355.259	341.236	11.9378	17.6242	18.8106	19.1839	17.4916	18.1409	17.6898
SDW06824	Unknown	C26 H46 N6 S2	507.329	507.271	10.7118	25.9055	25.3969	26.3494	27.8556	27.9765	28.0271
SDW06836	Unknown	C27 H61 N10 O P	573.487	573.487	11.5354	23.811	24.7844	24.5013	22.3594	22.4736	23.5024
SDW06839	N1-[5-chloro-6-methyl-2-(2-pyridyl)pyrimidin-4-yl]-N2-[6-(trifluoromethyl)-2-pyridyl]ethane-1,2-diamine	C18 H16 Cl F3 N6	409.11	185.042	4.15136	13.7928	ND	23.6754	15.4512	16.9564	19.4361
SDW06842	2,4-Dimethylbenzaldehyde	C9 H10 O	135.08	107.086	7.17575	ND	13.406	18.9304	ND	13.2971	20.3166
SDW06845	Nitrosoheptamethyleneimine	C7 H14 N2 O	143.118	98.0968	0.866105	14.4235	13.5157	20.3887	14.2397	13.6524	17.6106
SDW06848	Unknown	C16 H24 F5 N2 O2 P	403.157	403.157	4.6332	ND	13.7173	ND	17.5781	14.5006	13.3935
SDW06852	Unknown	C28 H44 F N O9 P2 S	652.227	652.227	0.590807	19.9904	15.858	22.6236	23.9475	23.5184	24.3627
SDW06867	enoxolone	C30 H46 O4	471.347	123.044	11.1993	20.506	ND	ND	ND	ND	ND
SDW06873	Unknown	unknown	110.032	83.0609	0.72433	20.6058	20.2012	21.9895	20.4013	23.0174	24.8332
SDW06879	Unknown	C3 H8 F4 N4	177.075	160.076	1.58723	16.89	17.5697	ND	ND	ND	25.7269
SDW06891	6132055	C19 H36 O3	313.273	57.0707	14.2297	18.1308	18.3633	18.0624	18.2169	18.3797	18.2611
SDW06892	Unknown	C20 H46 N7 O6 P	512.334	104.107	9.67383	21.5834	16.437	14.2394	ND	ND	15.121
SDW06895	Unknown	C15 H37 F3 N8 O5 P2	529.238	188.07	2.51023	20.7748	ND	20.7484	17.7617	13.4536	15.2882
SDW06914	Unknown	C35 H24 N4 O5 P2 S	675.101	87.0446	10.1418	18.0802	18.1842	15.0923	17.5386	17.5832	17.9781
SDW06920	Unknown	C22 H47 F4 N8 O6 P	627.335	465.282	10.6575	23.1343	23.7596	22.8406	17.5526	16.4885	20.0077
SDW06925	3-Methyl-1,5-dinitro-6-phenoxy-3-azabicyclo[3.3.1]non-6-ene	C15 H17 N3 O5	320.123	146.06	3.03507	13.709	ND	22.3213	13.7005	ND	ND
SDW06927	3,4-Methylenedioxy-α-pyrrolidinopropiophenone	C14 H17 N O3	248.128	177.054	3.51255	ND	14.5004	23.0198	ND	ND	15.4474
SDW06928	Unknown	C28 H24 F2 O7 S	543.128	543.128	5.46163	14.3483	15.3222	16.6613	25.296	18.5481	16.9439
SDW06931	Unknown	C13 H31 F N9 O5 P3 S	538.144	538.144	4.96698	19.7533	18.6352	21.2401	16.9552	14.9913	24.6371
SDW06934	Unknown	C6 H12 F2 N2 O3 S2	263.034	118.086	0.780832	23.274	18.4907	15.2252	13.3042	14.5175	ND
SDW06935	Tetranor-12(S)-HETE	C16 H26 O3	249.185	193.122	9.4675	17.1226	17.979	17.5655	16.9095	17.0124	18.3483
SDW06940	Unknown	C32 H68 N10 P2 S2	719.462	719.462	12.6069	22.0916	21.7756	23.1353	24.4099	24.0816	25.1609
SDW06948	Unknown	unknown	167.964	82.9483	0.578014	17.8216	20.701	20.33	17.0792	16.7738	16.6465
SDW06956	Unknown	C26 H42 F2 N6 O3 S	557.308	557.308	11.1627	24.6136	23.9215	24.5569	21.6158	19.9205	23.0464
SDW06957	Nuarimol	C17 H12 Cl F N2 O	315.07	315.07	1.95126	22.6069	19.7315	17.9973	24.6659	25.1587	19.9656
SDW06974	Unknown	C19 H34 F N2 P S	373.225	373.225	11.8869	23.378	22.6491	24.8405	18.8819	18.1728	22.4018
SDW06992	Unknown	C28 H49 F O S	453.354	453.354	11.551	21.2798	21.8937	21.6009	21.0171	21.5356	21.5446
SDW06994	Unknown	C15 H32 N2 O4	305.245	123.044	11.0463	ND	ND	ND	16.5391	ND	ND
SDW06995	Liquiritigenin 7- (3-acetylapiofuranoside) -4'-glucoside	C28 H32 O14	615.168	391.099	6.41394	ND	ND	24.4507	14.2758	ND	13.4998
SDW07000	2,3,4,5-Tetramethoxybenzoic acid	C11 H14 O6	243.086	151.039	3.58914	19.6424	ND	13.8925	ND	ND	ND
SDW07002	Unknown	C33 H48 F N O9	622.338	622.338	11.3724	24.4484	24.8377	24.3354	16.9931	18.2469	21.5694
SDW07004	Unknown	unknown	117.068	103.006	0.573786	22.2926	19.5539	22.9958	23.4736	23.302	23.551
SDW07005	symphytine	C20 H31 N O6	382.221	320.185	5.13002	ND	ND	ND	ND	ND	22.3456
SDW07006	Unknown	C2 H2 O4 S	122.974	122.974	0.868551	22.8418	27.4686	26.4456	22.1621	23.807	25.7818
SDW07013	Thiamine	C12 H16 N4 O S	265.111	265.111	0.585181	21.0064	20.3863	22.9451	23.1797	24.1514	23.2475
SDW07018	Unknown	C17 H30 F2 N O8 P3	508.121	508.121	4.43558	24.3498	20.3804	15.8522	ND	21.3915	23.4192
SDW07025	Unknown	C23 H45 F N6 O S	473.344	473.197	10.3796	22.2753	21.6386	20.8856	21.8253	22.5389	21.9004
SDW07029	Unknown	C12 H29 F5 N9 O3 P S	506.187	147.044	0.86531	14.3563	22.5847	18.7254	14.2721	14.8273	15.4332
SDW07034	Unknown	C17 H34 Cl N O2	320.235	320.235	11.3699	25.5624	26.1749	25.5724	20.2373	21.1894	23.8288
SDW07035	Unknown	C5 H11 N2 O4 P	195.054	138.989	7.16401	ND	ND	16.7157	ND	ND	24.2362
SDW07039	GABAZINE FREE BASE	C15 H17 N3 O3	288.134	177.054	3.66656	ND	ND	21.1409	16.2858	15.6307	13.8951
SDW07049	Unknown	C7 H4 F2 N8 P2	301.008	301.008	0.588139	20.1889	18.4724	20.3556	22.3067	22.2043	21.4271
SDW07054	Unknown	C22 H25 F N4 O3 S	445.17	197.117	4.9736	19.6882	ND	ND	ND	14.1595	ND
SDW07060	Unknown	C28 H7 N5	414.078	414.078	3.08646	14.2793	14.0871	21.469	ND	13.9791	ND
SDW07075	Hovetrichoside C	C21 H22 O11	451.123	139.039	4.3738	ND	ND	ND	ND	19.2273	ND
SDW07077	Unknown	C16 H27 N O3 P2	344.154	344.154	0.848269	22.1693	23.0175	25.1793	25.331	26.4472	25.0789
SDW07087	Unknown	C21 H31 F N5 O2 P S2	500.169	161.06	4.96597	14.6883	16.3105	20.763	17.0724	15.1315	27.4862
SDW07089	Unknown	C24 H57 F3 N9 O P S	608.414	608.414	12.9665	24.7329	21.8694	19.5186	20.5937	21.3675	20.5438
SDW07100	Unknown	C2 H4 F N5 O4	182.033	136.076	1.04871	23.2281	22.4451	28.0372	23.1674	24.2382	26.4098
SDW07103	Unknown	C17 H25 F O3 S	329.159	149.096	3.98229	ND	ND	ND	19.0818	ND	ND
SDW07104	Unknown	C7 H3 N	102.034	56.0503	0.766562	19.208	18.6994	22.2726	23.1732	21.1177	21.3786
SDW07108	Leptosin	C22 H22 O11	463.123	313.07	5.91853	20.8391	17.6494	18.8275	ND	ND	ND
SDW07128	Unknown	C33 H56 F N7 O S	618.434	301.141	9.71368	15.332	17.3661	ND	16.8505	15.5772	18.249
SDW07132	Unknown	C20 H33 F3 O	347.255	347.255	11.7529	22.3193	22.649	21.5251	20.4926	19.3173	21.5076
SDW07134	Unknown	C36 H66 F5 N7 O3	740.522	599.503	12.6354	23.9312	23.6351	24.942	25.0216	24.8842	24.4804
SDW07145	(2S,3S,4R,5R)-4-hydroxy-2,5-bis(hydroxymethyl)-2-{[(2R,3R,4S,5S,6R)-3,4,5-trihydroxy-6-(hydroxymethyl)oxan-2-yl]oxy}oxolan-3-yl (2E)-3-(4-hydroxy-3,5-dimethoxyphenyl)prop-2-enoate	C23 H32 O15	571.162	409.11	4.63509	16.8474	25.8066	25.1452	15.8722	ND	19.4985
SDW07155	Unknown	C22 H43 Cl F2 N2 O2	441.306	441.306	12.0214	24.0496	22.862	22.955	23.2237	23.2357	23.1533
SDW07157	Unknown	C16 H39 F N9 O3 P S2	520.24	520.24	10.7267	25.9372	26.385	25.2591	16.6904	19.7637	20.7699
SDW07163	Unknown	C25 H41 N5 O3	460.326	424.305	9.33159	ND	14.4465	21.0214	ND	ND	15.328
SDW07178	(6-{[3,4-dihydroxy-2,5-bis(hydroxymethyl)oxolan-2-yl]oxy}-3,4,5-trihydroxyoxan-2-yl)methyl (2E)-3-(4-hydroxy-3-methoxyphenyl)prop-2-enoate	C22 H30 O14	541.152	347.094	3.66873	17.5034	17.2551	16.6329	ND	ND	24.4
SDW07179	Unknown	C3 H6 F4 N4	175.06	70.0658	0.707457	24.4415	23.9718	24.7688	29.9363	30.4756	27.2284
SDW07181	Unknown	unknown	118.127	118.086	0.73603	30.935	27.4433	27.1307	24.7567	25.6857	25.1826
SDW07185	2-Undecanone 2,4-dinitrophenylhydrazone	C17 H26 N4 O4	351.202	207.065	4.50309	22.0124	ND	15.9163	ND	ND	14.0982
SDW07186	Unknown	C23 H40 N2 O3 P2 S	487.231	104.993	11.936	20.3917	20.8929	21.3564	20.0144	20.3261	20.2095
SDW07190	Unknown	C10 H10 N5 O5 P S	344.021	344.021	0.85596	21.9062	22.807	25.2417	25.2937	26.4507	25.0573
SDW07194	Unknown	C19 H29 F2 N2 O2 P3	449.148	449.148	3.09296	19.2649	24.1107	21.311	15.8489	18.9633	17.6134
SDW07197	Adipic acid	C6 H10 O4	147.065	84.045	0.763428	22.9572	20.9264	24.4937	25.7291	24.5429	26.273
SDW07206	Unknown	C23 H38 F N7 S3	528.243	528.243	5.32186	14.6564	14.9048	24.0626	17.1019	14.0294	14.4329
SDW07211	Unknown	C14 H5 F4 N10 P	421.045	421.045	4.62561	20.8583	18.3257	20.1614	18.035	18.3697	19.3198
SDW07214	Unknown	C29 H48 F2 O2 S2	553.298	377.266	10.8758	18.8198	18.6883	16.9082	ND	ND	ND
SDW07215	Ethyl palmitoleate	C18 H34 O2	283.263	69.0706	11.634	20.327	22.7206	21.7106	17.4175	17.039	19.2142
SDW07217	4-Nitro-N-[4-(4-pyridinylamino)phenyl]benzamide	C18 H14 N4 O3	335.133	57.0707	7.54578	ND	ND	ND	ND	ND	18.7729
SDW07221	Unknown	unknown	101.073	101.073	1.96286	16.0607	20.1142	21.0633	16.419	17.6924	20.8132
SDW07226	Unknown	C H F5 N4 O3	213.004	213.004	7.95897	16.9085	18.5941	18.9467	18.5665	18.6464	18.4977
SDW07229	Unknown	C41 H30 N4 O5 S	691.201	177.054	7.59957	ND	ND	13.5911	ND	ND	23.4208
SDW07247	FL2F3GGS0001_a	C17 H16 O7	333.096	153.018	5.36316	ND	ND	23.5721	ND	ND	ND
SDW07248	Unknown	C2 H6 F5 N10 O P S	345.018	345.018	0.85684	19.632	21.0867	23.0133	23.0553	24.0911	22.5794
SDW07250	Unknown	C19 H29 F5 N2 O5 P2	523.154	523.154	5.44734	19.0165	17.2312	16.1654	22.7033	ND	17.8882
SDW07259	Unknown	C13 H27 F N6 O4	351.214	263.125	9.3055	19.5035	18.0274	17.4945	13.6768	ND	15.1283
SDW07261	Unknown	unknown	574.491	574.491	12.5933	18.3313	20.3884	21.5108	25.8084	24.5772	25.9796
SDW07268	Unknown	C15 H3 F O3 P2 S3	408.878	408.878	0.583661	20.3553	19.2491	22.7075	23.2251	23.1059	23.3775
SDW07272	2-(3,4-dihydroxyphenyl)-5,7-dihydroxy-3,4-dihydro-2H-1-benzopyran-4-one	C15 H12 O6	289.07	153.018	4.7009	13.5951	ND	21.7787	14.035	ND	16.6835
SDW07278	Unknown	C10 H20 N4 O3	245.161	245.161	0.581018	21.435	19.111	21.8367	23.1192	22.9863	23.1784
SDW07283	QJ4750000	C10 H8 O2	161.06	161.06	8.46666	19.8755	20.8987	20.332	20.9379	20.768	20.3753
SDW07284	Unknown	C31 H62 N8 O S2	627.459	627.459	13.3221	22.9728	23.2218	21.5993	21.1498	21.4014	22.1612
SDW07289	Unknown	C26 H65 N10 O6 P S2	709.435	709.435	11.3603	26.7826	26.8872	26.7872	18.3999	20.2708	24.6403
SDW07292	2-{2-[2-(Hexylamino)ethoxy]ethoxy}ethanol	C12 H27 N O3	234.206	186.185	6.04412	ND	15.9743	16.2203	ND	13.8465	16.5185
SDW07300	Unknown	C46 H63 F	635.5	635.5	12.7405	20.4392	23.1486	18.8975	23.0177	22.5811	24.074
SDW07308	Unknown	C26 H40 S	385.291	385.271	10.6684	22.386	22.2411	21.9135	23.0395	22.8803	22.6412
SDW07312	2-Ethyl-N-({(2R,4S,5R)-5-[6-(2-furyl)-2-methyl-4-pyrimidinyl]-1-azabicyclo[2.2.2]oct-2-yl}methyl)butanamide	C23 H32 N4 O2	397.256	397.185	6.59952	20.1359	16.2548	24.5897	18.5672	16.2151	18.9891
SDW07317	3-(3,4-dihydroxyphenyl)propanoic acid	C9 H10 O4	165.051	123.044	0.870233	23.1304	26.943	26.8834	22.2091	24.1469	25.2232
SDW07330	denbufylline	C16 H24 N4 O3	321.192	177.055	4.33881	19.85	14.4445	22.0454	ND	ND	17.9971
SDW07338	Unknown	C32 H47 N3 O4 S2	602.31	455.257	9.10109	17.6377	ND	23.67	14.7655	13.7449	20.8961
SDW07339	Unknown	C8 H11 F N6 O3 S3	355.01	130.065	2.96523	ND	ND	21.0191	ND	ND	ND
SDW07342	Unknown	C41 H65 N2 P S	649.471	649.471	12.0891	27.0021	22.0183	20.2441	19.7564	19.4463	20.5299
SDW07344	Unknown	C12 H13 F3 N4 O4 S	367.068	307.047	0.581336	17.791	16.9583	19.9836	17.7666	18.269	17.475
SDW07346	Unknown	C15 H36 N6 S	333.278	123.044	11.4536	15.3196	14.4761	14.8791	16.3607	ND	14.3692
SDW07351	Unknown	C17 H38 F2 N6 O2	397.309	137.06	11.9228	14.0401	15.8059	19.9476	ND	ND	ND
SDW07355	Unknown	C30 H29 N2 O4 P S	545.165	207.065	7.37639	ND	21.9179	ND	ND	ND	ND
SDW07358	Unknown	C48 H58 F P	685.436	685.436	12.0449	21.7884	20.0106	22.3411	22.4586	22.048	20.6838
SDW07369	Unknown	C13 H27 F5 N6 O5	443.204	443.204	11.6866	20.4226	20.6481	20.6683	19.391	19.2502	19.1702
SDW07381	Unknown	C27 H54 N2 O5 S	519.38	104.993	11.9919	20.2528	21.4683	19.1566	16.2205	15.929	18.0661
SDW07396	2,4,6-Tribromophenyl 1-naphthalenesulfonate	C16 H9 Br3 O3 S	518.791	146.982	10.9277	22.6173	23.4672	22.1348	18.1697	18.0427	20.8347
SDW07407	NP-002322	C18 H32 O4	335.219	247.13	9.30638	16.8956	15.8944	15.2768	ND	ND	ND
SDW07409	Amphetamine	C9 H13 N	136.112	136.112	2.2051	27.6365	26.1253	27.3756	21.9264	20.1197	23.0078
SDW07421	(1E)-3-hydroxy-3-[(4Z)-3-hydroxy-5-oxo-4-(2-{[3,4,5-trihydroxy-6-(hydroxymethyl)oxan-2-yl]oxy}ethylidene)oxolan-2-yl]-2-methylprop-1-en-1-yl (2E)-3-(4-hydroxyphenyl)prop-2-enoate	C25 H30 O13	561.157	192.039	5.85974	ND	ND	20.1763	ND	ND	ND
SDW07424	5-{(2R,3S)-6-Hydroxy-2-(4-hydroxyphenyl)-4-[(E)-2-(4-hydroxyphenyl)vinyl]-2,3-dihydro-1-benzofuran-3-yl}-1,3-benzenediol	C28 H22 O6	455.148	107.049	4.09738	ND	ND	ND	ND	22.1314	ND
SDW07442	Unknown	unknown	648.561	648.561	15.9106	ND	13.9396	14.8919	ND	13.9797	13.985
SDW07448	Pregabalin	C8 H17 N O2	160.133	160.075	1.59582	16.6354	19.0864	ND	ND	ND	27.5026
SDW07458	Unknown	C6 H20 F2 N9 O3 P S	368.12	252.073	2.81277	22.2077	13.7647	21.499	16.6857	15.8908	19.9084
SDW07462	Unknown	C19 H39 F3 N7 O3 P	502.29	459.248	11.0565	23.2397	24.8434	24.5706	22.2782	18.4253	23.3724
SDW07463	Unknown	C15 H21 F6 N2 O P3 S	485.056	485.056	3.4462	22.3185	17.597	19.0037	19.3423	19.7745	18.6942
SDW07465	Aflatoxin G2	C17 H14 O7	331.08	315.049	6.42339	19.4736	21.2699	20.9863	ND	13.5421	18.2157
SDW07478	Unknown	C23 H29 F O3 S	405.19	167.07	5.31549	16.0929	13.3601	13.8719	17.8247	13.5297	21.064
SDW07482	Unknown	C22 H18 F N2 O4 P	425.107	177.054	7.23252	ND	ND	16.7353	ND	ND	22.6865
SDW07483	Unknown	C29 H63 N9 O5	618.505	618.505	14.4052	13.8827	ND	13.3193	ND	ND	ND
SDW07484	Unknown	C18 H30 N10 O2 S	451.236	317.178	10.8191	21.4269	20.9289	21.8581	22.6645	17.4552	22.3387
SDW07492	Unknown	C21 H30 F3 N O7	466.204	466.204	3.34514	18.2096	18.1897	22.8393	15.2719	17.0931	15.7764
SDW07493	Unknown	C10 H17 F2 N O4 S	286.092	124.039	2.69794	20.8381	24.118	22.0037	24.1596	ND	ND
SDW07504	Unknown	C12 H20 F2 N2 O3 S	311.123	136.076	2.02187	18.347	16.8964	22.3592	18.4039	18.6579	19.0075
SDW07507	Unknown	C26 H62 F N9 O5	600.494	600.494	12.4002	24.5126	26.6288	23.7916	25.4633	26.8692	25.3686
SDW07518	Unknown	C34 H62 N10 O2 S	675.487	675.487	11.3953	24.5193	26.2486	25.7118	23.6918	23.9488	23.5608
SDW07526	Liquiritigenin 7- (3-acetylapiofuranoside) -4'-glucoside	C28 H32 O14	615.168	391.099	6.41715	ND	ND	24.4205	13.5852	ND	ND
SDW07531	Unknown	C35 H73 N5 O7 P2	738.506	738.506	12.7922	22.8555	24.5677	23.2887	25.1043	26.5361	25.8135
SDW07540	Corymboside	C26 H28 O14	565.155	379.08	5.22685	24.9255	22.8526	20.6484	ND	14.0578	15.0292
SDW07542	Unknown	C22 H54 N7 O8 P	576.385	576.385	10.9738	23.0743	20.7862	21.1905	22.5071	22.8097	22.803
SDW07549	Unknown	C26 H45 F4 N O4	512.334	512.334	10.1519	13.9231	ND	ND	ND	14.8151	20.5062
SDW07557	Unknown	C11 H20 F N5 O5	322.153	62.0608	10.5998	18.3206	14.3441	13.446	ND	ND	ND
SDW07568	MFCD11045309	C27 H40 O2	397.31	397.31	12.4097	22.4218	23.3797	21.3351	23.1737	23.6615	22.9926
SDW07575	Unknown	C15 H18 F N O2 S	296.112	120.081	4.20888	14.3457	ND	13.4647	20.3185	13.3507	18.2692
SDW07577	trans-beta-Nitrostyrene	C8 H7 N O2	150.055	150.055	1.74926	20.7723	19.4595	19.9963	17.9928	20.1348	22.7398
SDW07583	Unknown	C17 H42 F2 N8 O5	477.333	349.159	12.4525	18.5015	16.2233	19.272	21.8825	16.8584	21.7701
SDW07590	Unknown	C25 H47 F3 N3 O9 P	622.309	540.306	10.3085	21.2856	21.4492	19.1755	20.4911	20.9209	24.3729
SDW07594	Dihomo-γ-linolenic acid ethyl ester	C22 H38 O2	341.304	57.0707	14.2222	17.1843	17.1599	17.0844	16.8814	17.04	17.0072
SDW07601	Unknown	C23 H32 F2	347.255	347.255	11.7097	21.1793	21.6388	19.5725	23.8808	16.6365	19.2115
SDW07604	2-Carbethoxycyclopentanone	C8 H12 O3	157.086	157.086	2.52122	23.0943	19.0848	21.4406	19.8004	18.5604	23.2767
SDW07610	Mesalazine	C7 H7 N O3	154.05	137.06	0.864751	ND	ND	15.4908	13.5536	15.8874	27.5384
SDW07616	Unknown	C16 H31 P S	287.196	287.196	0.584086	20.7173	20.3114	22.1656	22.6808	22.5112	23.2881
SDW07618	Unknown	C22 H47 N5 O	398.386	398.386	13.312	22.9661	23.5539	23.1246	23.385	23.251	23.0696
SDW07629	Unknown	C8 H26 F2 N7 O10 P3 S	544.072	544.072	0.736982	25.4267	24.3327	26.4059	26.5484	25.2482	27.4465
SDW07634	Naphthalen-2-amine	C10 H9 N	144.081	144.081	4.10008	16.3537	13.6958	22.7918	17.9666	22.5557	16.3249
SDW07639	Unknown	C20 H41 Cl F O3 P S	447.224	447.224	11.6518	26.7493	19.8077	17.3022	21.4446	16.1501	16.3992
SDW07657	Unknown	C13 H33 N7 P2 S	382.207	382.207	0.722442	24.7967	26.3723	29.0987	29.7307	28.7777	30.0601
SDW07669	Unknown	C15 H35 F N3 O P	324.258	324.258	11.9266	22.8999	23.8168	24.2099	22.5968	23.2473	22.7834
SDW07672	Unknown	C18 H31 F3 N4 O P2	439.2	439.2	8.83016	19.4278	21.7952	21.1081	21.9204	21.6863	22.1806
SDW07675	Unknown	unknown	638.309	638.309	10.9067	23.7273	22.9485	23.1765	24.3963	24.4727	24.2091
SDW07687	Unknown	C25 H41 F5 O10 S	629.241	467.189	2.6476	16.2753	19.6692	22.7314	18.9622	22.9288	26.0157
SDW07688	Unknown	unknown	537.812	537.812	10.4121	18.7184	19.4578	19.7688	20.6585	19.5467	22.2291
SDW07689	Unknown	C24 H40 N2 S4	485.216	485.216	11.7584	ND	24.8383	24.3584	20.9496	20.6322	21.8793
SDW07700	Unknown	C21 H36 N4 O3	393.285	112.112	4.24092	21.6647	ND	ND	ND	ND	ND
SDW07710	Unknown	C43 H69 N3 O2 S2	724.49	724.49	13.067	23.1203	23.0353	23.6361	23.9233	21.3922	22.5765
SDW07717	Unknown	C17 H41 F N8 O6 S3	569.234	487.231	11.9442	24.0788	24.9835	24.6896	24.2828	24.8061	24.4083
SDW07727	Unknown	C8 H26 F2 N7 O10 P3 S	544.072	544.072	0.738114	25.5112	24.3647	26.3979	26.5937	25.2737	27.3809
SDW07734	Ethyl 5-amino-3-methyl-4-isoxazolecarboxylate	C7 H10 N2 O3	171.076	125.071	0.745736	18.4633	17.5303	21.0813	16.6522	18.0124	16.7657
SDW07739	Naphthalen-2-amine	C10 H9 N	144.081	144.081	5.4191	ND	13.6766	14.479	16.7055	14.8721	16.4826
SDW07769	QJ4750000	C10 H8 O2	161.06	161.06	8.46464	19.6914	20.3224	19.2149	20.5466	20.4279	20.2295
SDW07787	Unknown	C25 H47 F O	383.366	81.0705	13.1342	19.0749	19.258	18.9809	18.5128	17.6489	18.0072
SDW07804	Unknown	C14 H28 F4 N2 O S3	413.137	413.137	5.86524	17.4816	ND	17.0626	20.9377	23.8842	16.5298
SDW07808	Actinonin	C19 H35 N3 O5	386.263	104.993	11.2469	15.4172	14.9783	15.1989	16.7863	16.4533	16.2763
SDW07810	Unknown	C5 H7 F N4	143.073	143.073	1.59836	15.9017	16.061	18.654	17.6125	18.1932	24.2902
SDW07815	Unknown	C14 H28 F4 N2 O10 P2 S	555.095	555.095	0.818606	17.6683	18.1484	23.5557	25.724	20.1739	22.4867
SDW07819	Arachidoyl Ethanolamide	C22 H45 N O2	356.351	356.351	10.019	21.7712	21.6958	17.5762	20.8645	21.1053	21.6752
SDW07827	1,1'-(1,4,10,13-Tetraoxa-7,16-diazacyclooctadecane-7,16-diyl)bis(2-amino-2-phenylethanone)	C28 H40 N4 O6	529.302	130.065	3.54348	ND	ND	19.5431	ND	ND	ND
SDW07829	Unknown	C24 H49 N4 P S	457.35	104.993	11.2103	18.347	19.1727	19.4097	18.9656	18.1948	19.8526
SDW07833	1-[(2R,4S,5R)-5-(3-Cyclohexyl-1-methyl-1H-pyrazol-5-yl)-1-azabicyclo[2.2.2]oct-2-yl]-N-(4-methoxybenzyl)methanamine	C26 H38 N4 O	423.307	165.091	11.863	17.5365	18.6999	18.2038	13.6103	ND	14.8399
SDW07834	(2E)-3-(4-methoxy-2-{[(2S,3R,4S,5S,6R)-3,4,5-trihydroxy-6-(hydroxymethyl)oxan-2-yl]oxy}phenyl)prop-2-enoic acid	C16 H20 O9	379.099	216.088	4.54405	16.8646	17.7442	20.6988	21.2906	17.4325	18.1456
SDW07863	Propentofylline	C15 H22 N4 O3	307.176	177.054	4.14972	22.4533	14.6237	21.2832	14.5522	15.3078	15.467
SDW07864	Unknown	C11 H22 N4 O2	243.181	70.0658	1.9647	17.3802	17.1153	18.1062	20.4331	19.0081	18.7603
SDW07874	Unknown	C30 H62 F4 N6 O3	631.49	319.224	13.4536	21.8369	21.188	20.6394	18.2812	18.752	20.6455
SDW07880	Unknown	C17 H35 Cl O16	531.168	531.168	3.37535	26.3756	20.1172	23.342	14.3372	14.8427	ND
SDW07882	Unknown	C19 H42 F3 N4 O10 P	575.267	575.267	4.66825	16.0404	16.3873	16.8312	21.709	23.0205	16.2213
SDW07904	Unknown	C18 H20 F2 N8 O2 S2	483.119	153.04	1.24903	ND	ND	19.8554	ND	14.874	ND
SDW07912	Unknown	C14 H10 Cl N O2 S3	355.962	313.952	0.583752	17.1631	15.398	17.5558	18.1268	17.353	21.2703
SDW07919	Unknown	C39 H65 F3 O5	671.485	335.219	11.9166	21.9395	19.3785	19.2669	14.8634	16.2804	17.9841
SDW07924	Unknown	C12 H24 N6 O S3	387.108	387.108	5.20702	15.9632	21.461	14.0121	17.9637	17.3949	15.0515
SDW07954	4-Phenylcyclohexyl 4-hexylcyclohexanecarboxylate	C25 H38 O2	371.294	81.0705	11.541	17.4323	14.6997	14.1143	13.3133	ND	ND
SDW07978	furethidine	C21 H31 N O4	362.232	231.138	7.53967	ND	ND	20.6612	ND	ND	ND
SDW07980	Unknown	C20 H31 F2 N O8 P2	514.155	514.155	0.755617	ND	18.7288	26.7714	25.7917	23.5896	23.7928
SDW07984	(7E,10E,13E,16E)-7,10,13,16-Docosatetraenoic acid	C22 H36 O2	333.278	123.044	11.4508	14.3479	14.6776	14.2902	17.0983	14.9884	14.9105
SDW08003	Unknown	C29 H24 N2 S	433.173	432.763	6.75962	18.4336	15.6859	24.5119	ND	15.5442	ND
SDW08012	Unknown	C14 H26 N6 O2 S4	439.108	439.108	4.72384	16.1765	17.2606	16.6165	22.0859	24.9523	26.3631
SDW08016	Unknown	C21 H33 F5 N P S2	490.176	490.176	5.40114	17.6269	14.3269	23.6457	19.5805	19.29	17.0684
SDW08017	Unknown	C9 H15 Cl F3 N4 P S2	367.02	282.973	0.581215	15.6036	ND	17.2504	17.9978	17.5463	18.1452
SDW08021	Unknown	C38 H63 F N2 O2 S	631.465	327.227	11.6385	25.6505	27.3184	26.6766	21.1048	19.7067	23.6017
SDW08027	Unknown	C10 H10 F3 N7 O3 P2	396.034	185.042	4.24415	ND	ND	23.6749	14.9375	ND	16.4731
SDW08036	Unknown	C13 H15 F N2 O11	395.073	395.073	4.19547	22.8771	23.6337	21.9385	22.5031	18.4062	24.033
SDW08037	Unknown	C31 H66 F5 N9 S2	724.488	724.488	13.0791	23.3709	23.3852	23.8349	24.193	21.6968	22.7291
SDW08047	Unknown	C11 H24 F3 N4 O7 P	413.141	413.141	2.83555	18.8224	16.2007	19.1066	24.6879	21.9913	18.9886
SDW08064	Unknown	C33 H71 N5 O7 P2	712.49	571.471	12.3626	17.8618	18.5959	19.8937	25.3977	20.1159	24.1775
SDW08079	Indole-3-acetyl-L-aspartic acid	C14 H14 N2 O5	291.097	130.065	3.94454	15.3537	17.5859	21.0345	14.1695	18.5159	ND
SDW08080	Unknown	unknown	524.649	524.649	0.747614	24.7685	23.2948	24.1649	24.1502	22.8979	22.6834
SDW08086	Unknown	C16 H33 F6 N7	438.277	438.277	10.9319	22.3795	22.8573	21.9416	17.8915	17.2778	20.5431
SDW08092	Sulfurol	C6 H9 N O S	144.048	117.07	2.49723	26.0131	21.465	24.3526	22.7714	21.5487	25.099
SDW08097	2-OXOCYCLOHEXANECARBOXYLICACID	C7 H10 O3	143.07	143.07	2.50383	26.0831	21.9631	24.4192	23.2075	21.8799	25.1747
SDW08105	Unknown	C16 H40 Cl N6 P S2	447.224	447.224	11.6657	27.0131	20.1461	17.4132	ND	17.0144	17.6047
SDW08106	N-Hexyl-N-(2-methoxyethyl)-1-hexanamine	C15 H33 N O	244.263	244.263	8.51742	21.3682	21.1006	20.5053	21.2738	21.3299	21.5878
SDW08107	Cefquinome	C23 H24 N6 O5 S2	529.133	529.133	0.821013	22.9274	22.3562	23.8123	21.354	21.2913	20.3167
SDW08109	Unknown	C19 H36 N O8 P S	470.197	470.197	0.862954	20.3867	23.0458	23.5092	24.1016	25.7793	19.296
SDW08126	Unknown	C21 H21 N2 P	333.151	333.151	10.1192	22.6741	23.3736	16.3439	17.9445	16.4869	22.7749
SDW08129	Spirodiclofen	C21 H24 Cl2 O4	411.113	411.113	4.01017	21.321	16.0107	22.722	18.1967	20.3803	25.2417
SDW08139	myricetin 3-O-beta-D-galactopyranoside	C21 H20 O13	481.097	319.044	5.55364	ND	ND	ND	15.4615	18.2374	21.7102
SDW08146	Unknown	C19 H41 F2 N5 O15	618.265	315.133	2.96774	ND	ND	ND	23.3487	ND	ND
SDW08148	Unknown	C26 H38 Cl N9 O4	576.279	104.107	10.9398	19.3295	18.7225	18.3507	15.2948	15.3205	18.253
SDW08163	Unknown	C11 H27 F3 N6 S	333.203	333.203	9.19182	20.3412	20.5553	22.2188	18.8688	19.3696	23.6606
SDW08175	NITROSOMORPHOLINE	C4 H8 N2 O2	117.066	69.0343	0.751436	14.6598	15.2324	18.9859	16.3078	17.1117	15.8473
SDW08183	Unknown	C26 H37 F N2 O11	573.244	177.054	5.87498	ND	ND	21.8588	ND	ND	ND
SDW08189	2-(hydroxymethyl)-6-{5-[3-(hydroxymethyl)-5-(3-hydroxypropyl)-7-methoxy-2,3-dihydro-1-benzofuran-2-yl]-2-methoxyphenoxy}oxane-3,4,5-triol	C26 H34 O11	545.198	189.052	5.81335	19.3191	13.334	20.5325	ND	ND	14.1936
SDW08195	Unknown	C13 H27 F3 N2 O3	317.206	317.178	11.1169	24.7143	25.4953	25.1359	23.5444	20.7242	25.8883
SDW08204	Unknown	C37 H62 O4	571.471	81.0705	12.3507	14.5944	13.358	15.4652	20.6165	15.6534	19.6635
SDW08205	Unknown	C15 H27 Cl2 F3	335.151	335.151	11.3864	24.3091	23.9409	23.9178	20.8225	ND	20.9882
SDW08224	Unknown	C11 H27 N3 O S4	346.112	346.112	0.856801	22.9323	21.6283	25.0731	26.3765	25.4724	22.6104
SDW08227	Unknown	C7 H12 N7 O5 P3	368.019	206.045	2.56767	16.5289	15.5581	21.9452	21.1087	18.1289	ND
SDW08230	Unknown	C7 H11 N8 O4 P	303.073	153.018	5.01539	ND	ND	23.3255	ND	16.2364	ND
SDW08232	Methyl (2-[(Z)-(2-(4-methylphenyl)-4-oxo-1,3-thiazol-5(4H)-ylidene)methyl]phenoxy)acetate	C20 H17 N O4 S	368.097	206.045	2.56518	17.9988	16.9454	22.8702	21.9286	19.3972	ND
SDW08238	Unknown	C5 H6 N5 O3 P	216.028	216.028	1.07398	18.9482	17.9995	18.6861	19.9596	15.5722	17.3889
SDW08242	Unknown	C13 H15 F6 N	300.118	300.118	0.586238	20.0556	18.864	19.6246	21.9911	21.891	20.9524
SDW08253	Unknown	C13 H26 N2 O3 S	291.173	132.084	3.2623	15.6566	19.6021	19.3789	14.9123	20.4133	ND
SDW08254	[Similar to: 5-benzyl-4-hydroxy-6H-pyrido[3,2,1-jk]carbazol-6-one; ΔMass: -12.9132 Da]	C10 H30 N6 O P2	313.204	57.0707	11.2656	23.5443	22.7444	23.1571	22.1291	22.0389	22.2384
SDW08260	Unknown	C10 H19 Cl2 F5 N5 P3	468.022	468.022	0.874901	18.0536	17.1149	19.4946	20.6878	20.4151	18.9038
SDW08265	Unknown	C13 H17 F N2 O6	317.114	317.114	9.37934	21.0832	22.7602	24.2387	23.8529	24.2425	23.1985
SDW08272	Unknown	C11 H26 F N4 O11 P	441.138	441.138	4.88487	18.369	15.5666	15.0874	20.3993	15.4028	ND
SDW08274	Unknown	C29 H35 F2 N O S3	548.191	548.191	5.09119	22.3014	ND	20.1839	18.1124	18.2425	21.5955
SDW08281	Unknown	C27 H63 F4 N10 P	635.501	635.501	12.7491	20.3724	23.2345	18.9163	23.0087	22.5731	24.0652
SDW08284	Unknown	C22 H47 F N2 O7	471.346	471.346	11.2734	22.5383	20.7316	20.7329	19.3651	19.5782	20.9328
SDW08291	Unknown	C15 H30 F4 N4 O2 P2 S	469.157	469.157	4.62766	16.648	17.4979	ND	22.7423	ND	ND
SDW08302	Unknown	C2 H5 F5 N2 O2 P2 S	278.954	278.954	12.0183	14.4511	15.7413	14.4372	13.4191	14.9421	14.6252
SDW08324	Unknown	C33 H54 N4 S	561.397	561.397	10.7709	24.6734	23.7558	23.5225	24.234	24.4284	24.1122
SDW08333	Unknown	unknown	110.976	68.9978	0.815953	17.3831	16.6776	16.055	21.1048	17.0615	17.9438
SDW08334	Unknown	C6 H F O5	172.988	114.092	0.867831	20.7862	15.5769	14.1211	14.1848	14.3724	13.7302
SDW08335	Unknown	C26 H19 F O2	383.144	383.144	1.88937	13.4112	17.5701	21.443	17.3513	17.7806	17.8599
SDW08339	Unknown	C25 H38 N2 O5 P2 S	541.203	459.2	11.545	24.0333	23.5255	22.686	24.8539	25.2172	25.1268
SDW08340	Unknown	C24 H49 F Fe N2 O5 S	551.282	551.282	10.6145	22.2227	22.4685	21.057	22.9652	23.2954	22.8876
SDW08347	6-O-Methylguanine	C6 H7 N5 O	166.072	120.081	1.70067	25.2097	23.9342	28.8982	26.2771	28.1887	27.6407
SDW08366	Unknown	C34 H66 N2 O9	647.485	335.219	12.0473	21.4708	19.409	19.6532	17.0571	16.9794	20.1482
SDW08367	Unknown	C17 H40 F2 N7 P3	474.259	474.259	10.3851	20.2394	19.5795	19.0067	19.784	20.4557	22.1523
SDW08376	2-[(1S,4S,5S)-4-(Hydroxymethyl)-5-isopropyl-2-methyl-2-cyclohexen-1-yl]-1-[4-(2-methoxyphenyl)-1-piperazinyl]ethanone	C24 H36 N2 O3	439.23	203.052	5.24807	ND	ND	17.7637	21.3295	ND	ND
SDW08382	Unknown	C26 H64 F N10 O7 P	679.475	679.475	11.5207	23.6519	23.5588	22.5763	18.5097	17.8334	22.6987
SDW08387	Unknown	C12 H21 F4 N2 P S	333.117	333.117	4.62476	21.1891	19.4969	20.8038	21.2555	20.6752	21.8343
SDW08390	Unknown	C10 H12 F2 N3 P	244.081	244.081	0.579619	20.3805	18.0186	21.4082	22.5499	22.2837	22.6597
SDW08393	Unknown	C43 H66 S	615.498	615.498	12.5221	21.2197	22.2439	23.7802	21.1093	21.9974	22.7619
SDW08399	5-Imidazolepropionate	C6 H7 N2 O2	140.059	140.059	0.737535	22.006	21.901	21.8955	19.5678	22.1262	20.113
SDW08400	N-Isopropyl-2-{[(2E)-3-(3-nitrophenyl)-2-propenoyl]amino}benzamide	C19 H19 N3 O4	354.144	150.055	3.82397	19.4494	15.0076	15.0626	18.4435	18.5551	17.3215
SDW08404	Unknown	C23 H45 F S3	437.274	437.274	10.925	25.3322	25.0566	24.369	20.6859	19.8097	23.2289
SDW08408	Unknown	C19 H34 N9 O13 P	628.208	628.208	0.873881	18.0055	16.9965	19.6544	18.7506	19.1647	20.7077
SDW08422	leucoline	C9 H7 N	130.065	84.045	0.780748	23.2604	22.186	25.4246	24.9082	26.0467	27.3143
SDW08426	Unknown	C27 H42 N6 O2	483.344	423.323	12.0099	18.0477	17.9785	17.2784	18.0323	17.8962	17.8227
SDW08431	Pyraclostrobin	C19 H18 Cl N3 O4	410.087	216.006	9.52899	13.8786	ND	ND	ND	19.0868	17.2539
SDW08433	Unknown	C31 H68 N4 O7 P2	671.464	671.464	11.9237	25.7627	22.6859	22.9219	19.1393	19.0704	21.9865
SDW08434	Unknown	C14 H32 F N10 O2 P S	455.224	293.172	6.71882	ND	ND	14.5159	20.8632	18.162	13.6323
SDW08435	Unknown	C4 H11 N2 P	119.073	119.073	2.21842	20.0129	ND	19.0174	17.2298	14.5385	ND
SDW08458	ricinelaidic acid	C18 H34 O3	299.257	299.195	11.5472	20.089	21.3332	20.9448	18.3189	ND	17.6451
SDW08460	Unknown	C10 H27 F5 N9 O P S	448.181	106.065	2.69289	20.2928	21.6913	19.2702	22.1929	ND	ND
SDW08474	Unknown	C49 H47 N O	666.373	666.373	11.2951	20.8738	19.7197	20.2455	18.077	22.8249	21.2538
SDW08476	Unknown	C23 H35 F2 N5 O3 S	500.249	60.0564	6.84184	ND	ND	16.1269	ND	ND	ND
SDW08478	Unknown	C35 H72 F2 N6 S	647.558	647.558	14.8389	26.2684	26.6963	26.0809	26.3985	26.7847	26.6147
SDW08479	Unknown	C8 H3 F6 N4 O12 P3 S2	618.838	618.838	10.6068	24.6879	23.5224	22.4222	16.895	17.1348	20.6381
SDW08482	Suxibuzone	C24 H26 N2 O6	439.186	323.091	5.06464	ND	13.8136	22.8024	ND	ND	ND
SDW08497	(22E)-Ergosta-5,7,22-trien-3-ol	C28 H44 O	397.346	397.306	13.3359	24.4319	24.8834	24.4393	24.6257	24.5821	24.4016
SDW08514	Unknown	C8 H19 N8 O4 P3	385.083	206.081	4.23133	21.1144	ND	20.9625	16.9144	24.7256	ND
SDW08520	Unknown	C14 H22 F4 N4 O10	483.135	153.04	1.25495	ND	ND	19.7819	ND	14.2819	ND
SDW08524	Unknown	C2 H7 F N4 O S3	218.984	116.986	0.57179	16.3429	16.0186	15.7161	17.984	18.0593	16.5941
SDW08537	2-Naphthyl 1-naphthoate	C21 H14 O2	299.105	299.105	0.85985	19.4033	18.6242	21.0172	20.0928	21.8375	21.4964
SDW08545	Unknown	C19 H30 F4 O4 P2	483.147	483.147	4.47228	20.5493	23.8629	22.9452	21.2703	15.4359	19.0743
SDW08562	Unknown	C18 H30 F6 N7 P S3	586.144	586.144	4.74007	15.7555	17.0759	22.486	18.0002	14.0176	14.0856
SDW08566	Unknown	C19 H30 F2 N O4 P3	468.143	468.143	5.39106	ND	ND	19.1072	15.2063	15.0269	14.7133
SDW08568	Unknown	C5 H7 F6 N7 O4 S2	407.998	407.998	0.579621	19.7989	15.0909	21.6899	23.0342	22.3837	23.2465
SDW08571	Unknown	C3 H10 F2 N2 O4 P2	239.016	239.016	0.59405	18.168	16.8392	19.082	19.3439	19.4364	19.8841
SDW08572	Benzaldehyde	C7 H6 O	107.049	107.049	2.51499	17.4032	18.3855	24.6859	21.7977	20.3777	19.8978
SDW08578	Unknown	unknown	114.947	101.009	0.572447	24.6976	21.6474	25.6198	26.0481	25.8395	26.0343
SDW08579	Unknown	C41 H30 N4 O5 S	691.201	177.054	7.88387	ND	ND	15.9157	ND	ND	23.2499
SDW08584	Unknown	C29 H56 N6 O S2	569.402	569.402	11.4917	22.6317	22.7977	20.4291	18.0488	18.7795	18.9227
SDW08587	Unknown	C24 H39 F5 O10	583.255	583.255	12.0532	24.1894	22.6061	24.1434	26.1211	20.2771	23.436
SDW08589	Unknown	C15 H32 F N2 O2 P	323.225	323.225	12.2708	24.0496	25.2197	25.3498	24.2555	24.7204	24.4952
SDW08592	Unknown	C20 H19 F3 S2	381.096	381.096	3.40418	ND	ND	16.329	13.7467	ND	14.2712
SDW08599	Unknown	C24 H48 F O13 P	617.27	617.27	11.108	22.981	23.1459	23.3458	21.0908	17.289	23.5844
SDW08600	Unknown	C19 H50 N9 O2 P	468.389	468.389	10.3433	23.9958	28.934	21.0905	20.0405	19.3722	21.1157
SDW08602	Unknown	C20 H40 N5 O3 P3 S	524.212	524.212	4.49597	18.5802	15.2938	20.8414	13.8153	15.8656	18.3851
SDW08613	Unknown	C7 H14 F2 N2 O2 S	229.082	229.082	0.90608	27.5149	26.5858	25.5591	25.9053	24.8572	24.2775
SDW08616	Unknown	unknown	484.351	484.351	11.337	23.4964	23.633	23.4047	20.5352	21.427	23.1657
SDW08622	Probenecid	C13 H19 N O4 S	286.11	286.11	0.823563	19.1377	20.1086	20.041	21.1938	22.2897	20.8608
SDW08623	Unknown	C28 H62 F N9 O2	576.506	576.506	13.4197	24.7533	24.0779	23.4309	21.9438	21.0029	22.8765
SDW08624	Unknown	C8 H12 N7 O3 P	286.082	203.081	4.73725	ND	ND	ND	ND	ND	19.5616
SDW08634	Unknown	C8 H18 F3 N5 O5 P2	384.081	384.081	0.742349	21.7657	23.4547	26.5115	27.0499	25.9554	27.5442
SDW08643	Unknown	C16 H39 N9 O4 P2	484.266	184.073	6.42044	ND	ND	ND	ND	ND	22.4122
SDW08650	1-[(3S,9R,10S)-12-[(2R)-1-hydroxypropan-2-yl]-3,10-dimethyl-9-(methylaminomethyl)-13-oxo-2,8-dioxa-12-azabicyclo[12.4.0]octadeca-1(14),15,17-trien-16-yl]-3-[4-(trifluoromethyl)phenyl]urea	C30 H41 F3 N4 O5	595.311	595.311	11.6507	21.8367	21.5002	20.7042	21.5753	20.8853	21.8091
SDW08657	Benzaldehyde	C7 H6 O	107.049	107.049	2.44321	19.2809	19.0452	24.7057	22.0163	20.4545	19.9213
SDW08658	Unknown	C29 H44 N10 O2 S	597.347	597.347	10.6096	18.3727	19.4104	18.6045	18.9609	19.6218	19.7418
SDW08673	Unknown	C20 H47 N4 O13 P3	645.242	645.242	2.51319	18.1545	16.8226	20.4644	15.1536	20.4555	24.3439
SDW08676	Unknown	C2 H3 N3 O3	118.025	118.025	0.736185	30.7064	26.8253	26.9922	24.6892	25.5581	25.183
SDW08678	Unknown	C33 H67 N3 O5	586.516	586.451	13.6889	22.4347	21.2844	19.6727	18.6292	20.6154	23.916
SDW08679	Unknown	C16 H35 F N6 O	347.294	123.044	11.6202	20.7984	ND	ND	24.1494	13.5228	ND
SDW08685	Unknown	C17 H25 F3 N2 O4	379.183	297.18	10.8808	17.2998	18.3334	17.6933	18.2379	16.6931	21.95
SDW08702	Succinic acid	C4 H6 O4	119.034	60.0771	0.772493	25.3519	20.1349	17.4402	15.4211	16.815	14.5791
SDW08732	Unknown	C23 H40 Cl N O3	414.278	414.278	11.1982	23.5624	23.016	23.3747	22.9165	22.7038	22.6647
SDW08735	Unknown	C11 H9 F4 N10 O13 P	597.01	597.01	12.2301	24.7429	25.2418	23.8855	23.965	22.2669	24.0976
SDW08749	Unknown	C20 H41 N7 O3	428.334	428.334	8.53467	19.9199	22.355	22.4295	22.7558	22.4392	22.6508
SDW08755	Unknown	C5 H12 Cl F2 N2 P	205.047	146.06	2.49304	27.5692	22.8516	25.5092	23.973	22.8504	26.4048
SDW08757	Unknown	C9 H13 F4 N3 O5 P2	382.034	382.034	3.76037	17.7185	13.4121	19.6416	16.537	19.2749	23.5174
SDW08787	Unknown	C12 H28 N4 O S4	373.121	163.058	3.09924	ND	ND	20.9807	ND	ND	ND
SDW08792	Indene	C9 H8	117.07	117.058	2.50819	25.7633	20.9968	23.9999	22.4452	21.1575	24.603
SDW08795	Unknown	C41 H64 S	589.482	589.482	13.3252	23.3911	25.2975	22.1603	26.8037	23.3174	27.2381
SDW08801	Unknown	C31 H48 O3 S	501.342	501.342	11.2916	24.1218	23.7294	23.7671	23.8947	23.7308	23.8709
SDW08802	Unknown	C18 H49 N10 O4 P	501.375	501.375	11.282	24.1099	23.9584	23.8147	24.0936	23.9277	24.0406
SDW08815	(2S,3S,4R,5R)-4-hydroxy-2,5-bis(hydroxymethyl)-2-{[(2R,3R,4S,5S,6R)-3,4,5-trihydroxy-6-(hydroxymethyl)oxan-2-yl]oxy}oxolan-3-yl (2E)-3-(4-hydroxy-3,5-dimethoxyphenyl)prop-2-enoate	C23 H32 O15	571.163	409.11	4.62733	16.5436	25.5889	25.0115	15.5438	ND	19.4336
SDW08826	Unknown	C20 H46 F2 N6	409.382	317.178	12.751	16.9533	14.5685	20.2701	22.4699	16.4089	19.9153
SDW08830	pentobarbital	C11 H18 N2 O3	227.139	227.139	0.574029	23.1712	18.5105	24.5817	25.4975	25.2564	25.6354
SDW08836	Unknown	C33 H46 O2 S	507.328	507.271	10.7014	25.9643	25.1746	26.4428	27.9647	28.0234	28.0546
SDW08837	Unknown	C27 H51 F N6 O S3	591.335	591.281	7.43231	ND	14.2989	23.2981	17.0888	14.6287	15.3483
SDW08843	Unknown	C16 H27 F3	277.213	277.213	11.1876	18.5154	20.4797	19.8678	20.2704	19.3933	21.7912
SDW08847	Unknown	C24 H19 F N2	377.141	377.141	2.28413	16.9409	18.2174	18.6459	20.586	24.0396	19.1209
SDW08865	Unknown	C32 H68 F2 N7 P	620.533	620.533	13.7539	21.5248	22.0737	21.0139	22.3325	20.4458	20.4058
SDW08866	Unknown	unknown	359.596	359.596	2.98211	16.6352	15.163	24.4157	15.4881	14.5883	13.3341
SDW08869	o,o'-bis(trimethylsilyl)uracil	C10 H20 N2 O2 Si2	257.113	257.113	0.583196	22.7889	21.8584	22.3259	25.1162	25.2297	23.6825
SDW08880	Unknown	C10 H13 F3 N8	303.129	303.129	0.578571	20.374	19.1025	20.9739	21.7319	21.4349	21.6729
SDW08910	5-Cyano-4-methyloxazole	C5 H4 N2 O	109.04	109.04	0.781307	22.3405	22.6952	22.0558	21.1743	23.0716	22.2425
SDW08920	Unknown	C14 H35 N5 O4	338.276	338.276	11.9604	23.7966	25.172	25.6005	25.7471	25.8521	24.4812
SDW08921	Unknown	C13 H18 N10 O S3	427.09	427.09	3.70008	16.6627	17.5729	21.3015	19.8567	19.9785	18.8912
SDW08925	Unknown	C11 H33 F N9 O P S3	454.176	454.176	5.57922	23.8758	23.1548	23.2867	23.9338	23.6917	23.4779
SDW08929	Unknown	C17 H35 F4 N4 O2 P3	497.198	497.198	1.00005	17.1205	20.6196	24.4229	22.857	21.0521	24.0856
SDW08937	(2S,3R,4S,5S,6R)-2-(4,6-dihydroxy-2-nonyl-3-{[(2S,3R,4S,5S,6R)-3,4,5-trihydroxy-6-(hydroxymethyl)oxan-2-yl]oxy}phenoxy)-6-(hydroxymethyl)oxane-3,4,5-triol	C27 H44 O14	615.262	453.209	3.41645	ND	ND	ND	ND	25.4167	13.8101
SDW08939	Unknown	C29 H62 F3 N4 O2 P	587.466	587.466	13.5182	23.3293	22.997	22.8744	22.7542	23.0402	22.8495
SDW08946	4-(2-Carbamoyl-1-pyrrolidinyl)-4-oxobutanoic acid	C9 H14 N2 O4	215.103	215.103	0.841822	18.883	18.8964	19.8485	23.7333	23.4833	19.8507
SDW08958	Unknown	C16 H35 F4 N4 O6 P	487.23	487.23	11.3325	24.5317	23.1573	24.5284	23.8725	23.8654	23.9426
SDW08961	LysoPC(22:4(7Z,10Z,13Z,16Z))	C30 H54 N O7 P	572.368	572.368	11.4466	23.8069	24.0667	22.9221	16.1232	17.7308	21.565
SDW08963	Unknown	C13 H34 F N7 O13	516.227	516.227	0.748172	21.7187	22.8571	23.9872	23.6729	22.168	22.8236
SDW08965	Unknown	C13 H8 F2 N5 O7 P S4	543.909	104.107	11.04	24.5274	26.1634	24.991	21.5327	19.0068	23.1302
SDW08966	Unknown	C18 H27 F2 N O S	344.185	344.185	6.35728	14.7554	14.512	15.5077	15.7116	15.8849	22.3032
SDW08969	Unknown	C29 H37 F6 N2 O2 P S3	687.173	687.173	0.733384	26.1262	24.7331	25.9814	26.4395	24.1217	25.029
SDW08973	3-Methyl-1,5-dinitro-6-phenoxy-3-azabicyclo[3.3.1]non-6-ene	C15 H17 N3 O5	320.124	188.07	3.41437	19.0079	15.7376	17.5345	17.5569	17.6752	18.0408
SDW08998	6-Hydroxyluteolin 3'-methyl ether 7-sophoroside	C28 H32 O17	641.171	303.086	5.01133	ND	ND	20.4439	ND	ND	ND
SDW08999	Unknown	unknown	599.419	203.053	12.4084	19.0044	20.6615	18.0555	19.4959	20.8103	19.4896
SDW09000	Unknown	C21 H23 F N3 O5 P	448.144	124.039	2.68804	20.683	23.5083	21.0215	23.8281	ND	ND
SDW09005	2- [ 3,5-Dimethoxy-4- [ (3-methyl-2-butenyl) oxy ] phenyl ] -5,6,7-trimethoxy-4H-1-benzopyran-4-one	C25 H28 O8	457.184	457.184	11.1875	24.7459	23.7466	24.609	24.0902	23.9018	23.8704
SDW09006	Unknown	C28 H57 F N O3 P S	560.368	517.326	12.0529	20.1731	20.1668	17.5244	15.0558	18.7827	18.8483
SDW09009	Unknown	C9 H18 N5 O4 P	292.117	172.075	4.49127	ND	ND	20.5071	ND	ND	ND
SDW09013	Unknown	C23 H36 F2 N2 O10 P2	601.188	232.07	6.12484	ND	ND	20.3076	ND	ND	ND
SDW09025	Unknown	unknown	576.507	576.507	13.4211	24.7021	24.0663	23.3162	21.9076	21.0688	22.9141
SDW09041	[Similar to: 2-{2-[(2Z)-pent-2-en-1-yl]-3-{[3,4,5-trihydroxy-6-(hydroxymethyl)oxan-2-yl]oxy}cyclopentyl}acetic acid; ΔMass: -214.1571 Da]	C2 H4 F4 N4	161.044	119.019	0.569778	20.6608	18.1066	21.605	22.1221	21.6422	21.7475
SDW09042	Unknown	C47 H48	613.386	613.386	13.2	24.3275	24.1949	21.8415	25.934	25.1602	28.0444
SDW09043	Unknown	C12 H20 N5 O5 P	346.128	300.123	3.91557	ND	13.3269	14.5903	18.0689	20.7105	15.2797
SDW09048	Unknown	unknown	621.416	621.416	11.3703	25.7895	26.4894	25.7772	19.4883	19.8626	23.2996
SDW09059	Unknown	C17 H23 F3 N8 O P2	475.15	475.15	2.33154	16.1888	18.0573	20.0079	16.937	24.646	15.1042
SDW09061	Unknown	C34 H77 N5 O7 P2	730.537	184.073	12.5015	22.6246	23.8501	22.8925	26.2797	23.064	26.8837
SDW09073	VA3677000	C9 H8 N2 O	161.071	161.071	1.60914	15.4814	19.3937	14.644	13.3672	ND	29.1381
SDW09075	Unknown	C35 H36 F2 O15	735.21	735.21	4.78972	16.3313	19.1418	21.4659	21.9983	16.4138	14.7015
SDW09079	Linoleamide	C18 H33 N O	280.261	67.055	9.40939	15.5535	19.811	20.4316	15.503	16.1172	19.7358
SDW09082	Unknown	C18 H29 F6 N5 S2	494.186	494.186	0.882972	22.5136	22.1371	21.0848	18.6594	20.5814	21.0229
SDW09088	4-(3,4-Difluorophenyl)-4'-propyl-1,1'-bi(cyclohexan)-3-ene	C21 H28 F2	319.224	319.194	11.3833	27.7059	28.3027	27.7409	22.4773	23.4868	26.201
SDW09090	Unknown	C5 H7 Cl3 N8	284.994	284.994	0.584477	21.799	19.3389	23.5908	24.5745	24.1837	24.787
SDW09104	Unknown	C12 H29 F N6 O	293.247	293.247	11.1946	22.5924	24.3128	24.0597	24.1625	23.2514	25.3328
SDW09125	Unknown	C8 H16 F4 N6 O14 P2 S	590.993	590.993	13.6664	23.8503	23.7394	23.6042	23.7171	24.2232	24.1833
SDW09139	Unknown	C13 H27 F3 N2 O3	317.206	317.178	11.1219	24.6387	25.4869	25.1681	23.8831	21.0748	26.1279
SDW09163	Unknown	C7 H19 F N10 O P2 S	373.1	373.1	3.90422	21.1969	21.0509	20.5956	25.8357	21.8931	21.2642
SDW09166	Unknown	C13 H34 N10	331.303	331.303	9.83721	21.6849	21.2548	19.2546	20.7234	21.1247	21.8346
SDW09170	Unknown	C9 H16 F2 N6 O S	295.114	150.077	3.67265	21.2421	20.21	21.5593	17.3642	18.6781	17.5669
SDW09171	Acrinathrin	C26 H21 F6 N O5	542.142	542.142	0.914703	19.1591	22.1898	24.3222	20.946	21.0198	20.8139
SDW09173	1-Nonynylbenzene	C15 H20	201.163	201.163	7.89543	ND	ND	13.2914	14.3438	21.1194	13.9184
SDW09178	4'-Methoxyacetophenone	C9 H10 O2	151.075	123.081	12.0985	18.4484	17.9873	18.6798	ND	ND	ND
SDW09184	Unknown	C17 H40 N7 O8 P	502.275	502.275	11.2934	21.9831	21.1579	21.8061	21.9356	24.2095	21.9896
SDW09189	5-O-Methyleriodictyol 7-glucosyl- (1->4) -galactoside	C28 H34 O16	627.189	465.136	5.97728	13.3841	ND	18.5548	13.5896	13.4254	23.558
SDW09216	Unknown	C6 H13 F4 N6 O P S2	357.035	357.035	0.718341	18.865	18.277	23.267	20.8144	21.3163	18.9703
SDW09221	Unknown	C13 H29 N5 O4	320.23	320.23	8.45462	21.6861	22.4453	22.2476	23.2309	22.6951	23.1307
SDW09227	Unknown	C30 H20 N4 O S	485.144	485.144	2.7558	22.4022	21.4017	25.225	23.4788	18.4384	18.3462
SDW09241	Unknown	C25 H51 F2 O11 P	597.319	597.319	11.5342	25.088	23.6053	23.0606	17.7287	18.4143	20.5132
SDW09245	Unknown	C12 H14 N10 O14	523.076	523.076	4.50921	16.4679	17.1141	25.294	19.246	18.8805	18.2617
SDW09250	Unknown	C3 H10 F3 N10 O5 P	355.06	355.06	2.44796	22.4255	20.8841	26.4219	25.1418	22.5723	24.8873
SDW09251	Unknown	C17 H39 F6 N9 O2	516.322	516.322	10.9986	24.7596	25.5146	22.3987	19.7569	18.9817	19.7995
SDW09253	Unknown	C6 H15 F N6 O11	367.086	367.086	7.0578	18.6148	17.345	24.1138	17.5344	16.2302	17.8839
SDW09260	Unknown	C11 H26 Cl F N4 O7	381.154	299.195	11.2196	22.3276	23.2208	23.3201	22.7203	21.9056	23.6036
SDW09266	Unknown	C27 H49 F3 O2	463.377	104.993	11.2202	19.799	20.6783	20.929	20.4836	19.7614	21.4065
SDW09268	Unknown	C38 H65 F3 N5 O2 P	712.49	712.49	12.7015	19.3065	21.4313	20.1771	26.0035	20.6148	25.6386
SDW09281	Unknown	unknown	651.221	651.221	2.19272	25.4537	14.7061	14.2276	ND	14.844	16.7859
SDW09291	Unknown	C21 H44 N2 O9	469.312	469.312	12.0986	21.0982	20.657	21.5633	22.6325	21.5832	21.2674
SDW09294	Unknown	C17 H36 O S2	321.227	321.227	11.6323	26.1273	27.7823	27.1617	23.8831	22.7595	25.2495
SDW09296	Unknown	C8 H13 F N2 O2 S	221.075	84.045	0.769034	16.1196	18.3478	17.287	16.8801	15.7216	15.9228
SDW09301	Unknown	C21 H48 F N4 P3	469.313	469.313	12.1017	19.1551	21.4985	18.5933	18.0641	18.6167	17.3547
SDW09302	Unknown	C7 H17 F3 N6 O4 S	339.107	339.107	3.32318	22.9638	16.1959	23.7238	19.8408	19.978	21.0251
SDW09303	Unknown	C30 H32 N10 O2 S2	629.223	629.223	12.2046	21.8951	19.8499	21.6911	20.9282	23.7283	22.624
SDW09305	Unknown	C19 H32 F N5 O S3	462.181	462.181	5.29819	14.4365	14.143	20.8509	14.5062	14.5546	16.1373
SDW09306	Unknown	C14 H36 N9 O4 P S4	554.158	76.0222	2.66915	ND	ND	ND	19.9868	15.2195	ND
SDW09309	Unknown	C15 H30 N2 O6	335.218	335.189	10.4453	23.409	24.407	20.5579	18.6761	16.8957	24.2509
SDW09312	1-{2-hydroxy-3-[4-(1,2,3-thiadiazol-4-yl)phenoxy]propyl}-4-piperidinecarboxamide	C17 H22 N4 O3 S	401.105	357.115	2.67008	ND	ND	13.5893	22.194	17.9295	14.9534
SDW09318	Unknown	unknown	118.058	59.0737	0.7497	28.3913	23.2559	22.3504	20.0112	20.8583	20.0698
SDW09320	NP-016596	C19 H30 O8	409.183	293.071	4.96492	13.706	ND	19.4657	ND	ND	ND
SDW09322	ACPC	C4 H7 N O2	102.055	102.055	0.575815	22.3367	20.2165	23.0175	24.1181	22.9838	23.0382
SDW09323	Unknown	C19 H24 O4 S2	381.118	177.054	6.32557	15.0666	16.4237	20.0385	ND	ND	ND
SDW09334	Unknown	C18 H25 F N O13 P	514.113	162.055	3.12922	ND	ND	23.7106	ND	ND	ND
SDW09341	1-(1-Piperidinyl)-2-(1H-1,2,4-triazol-5-ylsulfanyl)ethanone	C9 H14 N4 O S	227.096	227.096	0.580552	22.8709	18.0525	24.3503	25.3644	24.8964	25.4025
SDW09364	Unknown	C33 H46 N10	583.397	583.397	12.3917	19.5337	23.5437	23.2485	18.277	19.3692	16.9291
SDW09368	Unknown	C16 H38 N9 O4 P S2	516.23	222.135	4.38308	ND	ND	22.3884	ND	ND	ND
SDW09378	Unknown	C30 H66 F2 N10 O	621.545	621.545	14.1878	23.7166	23.9506	23.8199	23.6175	24.2766	24.1109
SDW09395	Unknown	unknown	541.411	541.411	11.1095	27.4159	25.7316	27.2508	23.3868	19.2567	22.2735
SDW09401	Unknown	C23 H42 F2 O S2	437.274	437.274	10.928	25.2119	25.3919	24.8305	21.3938	21.2178	23.6409
SDW09410	Unknown	C42 H81 F2 N P2 S	732.561	732.561	12.5041	21.1438	23.3724	21.5601	24.8323	23.4374	25.6553
SDW09433	Unknown	C8 H12 Cl2 S2	242.984	242.984	0.57785	22.3745	19.7692	23.0448	24.6554	24.2694	24.2024
SDW09454	Unknown	C26 H53 O4 P S	493.349	329.242	11.9439	25.3082	26.1121	26.0117	25.4508	26.0381	25.6221
SDW09466	Unknown	C43 H71 N S	634.538	634.538	11.2053	21.7674	21.8217	21.4086	21.6556	21.4808	21.7425
SDW09471	Unknown	C14 H16 N4 O6 S	369.085	161.06	4.57544	ND	ND	ND	14.3006	ND	20.2135
SDW09472	Unknown	C28 H44 N6 O3 S	545.329	545.329	7.42798	20.1241	21.1289	20.0302	19.1041	19.2579	18.9568
SDW09478	Unknown	unknown	84.0067	84.0067	0.791997	22.3224	23.0217	24.9676	25.0807	25.3305	26.3427
SDW09500	Unknown	C12 H33 F N9 O10 P	514.214	514.214	4.60069	20.8086	20.3923	21.8284	15.6478	17.4922	16.7785
SDW09503	Unknown	C14 H20 F N S4	350.054	350.054	3.77145	17.2955	20.592	23.5345	22.0633	23.0683	19.4046
SDW09504	Unknown	C18 H39 F6 N7 O5	548.299	548.299	10.5349	17.9273	18.8343	17.1025	18.2689	19.6762	19.5916
SDW09509	Unknown	C9 H20 F3 N2 O3 P	293.122	293.122	11.1921	22.2122	24.0049	23.699	23.5829	22.6251	24.9064
SDW09515	Unknown	C21 H5 F5 N8 O13	672.997	672.997	11.9561	23.737	23.4195	23.0046	23.6638	24.0182	23.8899
SDW09540	Unknown	C19 H32 N4 O2	349.259	147.044	4.24197	22.3223	14.3718	14.3844	ND	14.4008	ND
SDW09541	Unknown	C22 H40 P2 S	399.241	399.241	10.9558	23.7237	22.8998	23.5164	23.6531	23.5186	23.3932
SDW09545	Unknown	C17 H35 N9 O S4	510.194	510.194	3.46868	ND	15.2883	22.2398	14.9126	13.3315	ND
SDW09557	Vitexin 2"-O-p-coumarate	C30 H26 O12	579.149	127.039	3.72916	ND	ND	ND	ND	21.8167	21.5787
SDW09578	Unknown	C4 H8 P2	119.018	91.0547	1.05048	21.9755	21.9448	26.2852	21.7805	22.8256	25.1735
SDW09590	Unknown	C41 H40 F N4 P S2	703.248	703.248	4.74334	21.2012	24.2843	19.4864	19.2978	16.9048	22.888
SDW09599	Unknown	C23 H30 F2 N2 O8 S	533.176	162.055	3.86923	ND	ND	22.3306	ND	ND	ND
SDW09601	Unknown	C23 H58 N7 O2 P3 S2	622.338	622.338	11.366	24.407	24.8105	24.391	16.1754	17.342	21.5833
SDW09602	Unknown	C15 H32 N2 O5	321.239	321.21	11.6368	25.8442	27.6239	26.9573	23.6064	22.551	25.0565
SDW09605	Unknown	C15 H32 N2 O4	305.245	305.245	11.6238	23.6058	26.0318	25.1082	21.3702	20.3207	22.7924
SDW09608	Unknown	C10 H19 Cl2 F S	261.064	261.064	2.7794	20.7286	19.8891	22.6112	20.4752	21.667	21.4336
SDW09609	Unknown	C12 H14 F2 N5 O2 P	330.093	110.072	0.816861	17.4579	14.0135	15.587	17.2075	15.3244	19.5018
SDW09621	Unknown	C34 H23 F N4 S	539.17	539.17	6.82696	18.2932	16.3343	23.9067	18.1379	16.4027	15.7233
SDW09627	Unknown	C15 H30 F N2 O2 P	321.209	56.9656	11.6271	21.6877	23.2185	22.6791	19.5694	18.1472	20.2107
SDW09628	Unknown	C38 H62 F2 O2	589.482	589.482	13.3137	23.3814	25.3072	22.1642	26.8057	23.3397	27.232
SDW09635	Unknown	C14 H18 F2 N3 O P	314.123	314.123	0.581041	19.6541	18.6581	21.3951	20.8606	20.6128	23.341
SDW09646	Unknown	C41 H66 S	591.497	591.497	13.6586	26.3982	26.069	26.2279	26.2991	26.8001	26.6819
SDW09662	Unknown	C11 H17 N7 O5 S2	392.082	230.042	3.10973	ND	ND	25.1721	ND	ND	ND
SDW09676	di(3-pyridyl) 5-(tert-butyl)isophthalate	C22 H20 N2 O4	377.145	243.087	4.59235	17.0164	16.9476	18.9244	15.4279	ND	18.0632
SDW09684	Unknown	C22 H45 F2 N9 O2 P2 S	600.291	147.044	4.41211	ND	13.3957	22.1039	ND	ND	13.3613
SDW09701	Unknown	unknown	120.053	120.053	1.70057	27.4795	26.287	30.6981	28.6046	30.1952	29.6449
SDW09712	Unknown	C29 H62 F2 N6 O4	597.487	81.0705	12.4467	18.1579	16.9452	18.6406	20.1899	20.6838	20.6828
SDW09746	Unknown	unknown	124.939	124.939	0.783815	20.2677	21.6007	21.3894	22.6298	19.7786	25.6982
SDW09748	Unknown	C18 H45 F N6 O5 P2	507.298	104.107	10.9277	19.7381	20.6449	19.3349	ND	ND	16.3871
SDW09755	Unknown	C7 H14 F3 N9 O4 P2 S	440.04	207.065	4.1461	14.7439	ND	19.7444	14.5369	14.1108	16.4605
SDW09759	Unknown	C17 H25 F2 N2 O6 P3	485.096	485.096	4.55345	18.1215	14.8941	19.7399	25.5215	21.3403	17.2218
SDW09764	Unknown	C9 H9 F5 N5 O6 P	410.028	410.028	4.16423	21.6279	20.8522	24.5112	22.0358	22.6196	23.3479
SDW09769	DIELAIDIN	C39 H72 O5	621.545	621.545	14.1856	23.6965	23.9569	23.831	23.6041	24.2562	24.0531
SDW09775	Unknown	C28 H50 F2 N10 O S4	709.309	709.309	11.3743	22.3191	22.6149	22.8275	17.1338	15.8331	20.3633
SDW09781	Rel-5-hydroxy-7,4'-dimethoxy-2"S- (2,4,5-trimethoxy-E-styryl) -tetrahydrofuro [ 4"R,5"R:2,3 ] flavanonol	C30 H30 O10	551.19	551.19	0.575137	19.817	15.4235	22.3774	23.3597	23.125	23.7943
SDW09792	Unknown	C39 H65 F3 O4	655.489	655.489	11.5419	24.3331	24.7159	24.4496	23.8333	23.9842	24.6143
SDW09801	Unknown	C23 H26 N6 S3	483.147	483.147	4.93126	15.8743	15.2028	19.7708	22.9766	ND	14.4942
SDW09832	Unknown	C13 H23 F4 N7 O	370.197	370.197	8.04345	ND	16.7839	20.4841	14.8444	14.9021	15.3045
SDW09834	Unknown	C20 H53 N10 O5 P	545.402	545.402	11.2022	23.8814	24.0595	23.6582	24.1822	24.3078	24.1422
SDW09852	Tetrahydroisoquinoline-3-carboxylic acid	C10 H11 N O2	178.086	178.086	0.865967	19.5312	21.026	21.3621	20.9385	20.9879	21.7442
SDW09853	Unknown	C17 H11 F3 O6	369.058	369.058	0.716591	16.2411	18.5028	22.0214	19.7961	19.4094	17.1558
SDW09861	Unknown	C14 H34 F3 N9 S4	514.185	514.185	5.94611	19.0308	17.5298	18.2629	17.4115	18.75	21.0002
SDW09871	Unknown	C40 H62 N8 S2	719.462	719.462	12.5829	21.9368	22.2161	23.0723	24.5636	24.0984	25.5608
SDW09876	Unknown	C7 H11 F N O6 P S2	319.982	319.982	0.868785	20.7506	19.9559	23.3606	21.4253	23.4791	20.1435
SDW09878	Unknown	C9 H19 N6 P S3	339.065	339.065	3.30891	23.0528	14.2985	23.6907	19.9475	20.1337	21.7179
SDW09879	Unknown	C17 H35 F2 N5 O4 P2	474.222	474.222	6.68376	20.5829	19.5574	19.8119	19.6783	19.4974	22.7904
SDW09916	BY1780000	C7 H7 N O	139.086	139.086	0.726259	22.4118	24.2615	23.1223	22.9438	25.3909	23.6174
SDW09917	Unknown	C33 H62 N2 S3	583.414	583.414	12.3862	19.6785	23.7096	23.3901	17.9946	20.7814	17.4212
SDW09934	Unknown	C12 H32 N6 P2	323.224	323.224	11.9152	23.9052	25.0846	25.2209	24.107	24.6297	24.2843
SDW09951	Unknown	C48 H60 N2 O3	713.468	713.468	11.6288	25.3335	26.7948	26.1624	21.589	21.3311	23.6289
SDW09959	Unknown	C19 H33 N7 O2	392.279	392.279	7.9215	ND	ND	ND	ND	ND	20.9413
SDW09971	Unknown	C18 H43 N7 O2	412.339	412.339	9.25078	22.1595	18.6821	19.6513	19.1061	18.4712	19.0111
SDW09987	Unknown	C22 H29 F2 N	346.233	346.233	0.855557	22.9905	21.0914	24.7995	26.0788	25.2772	22.0852
SDW09992	GLYCERYL RICINOLEATE	C21 H40 O5	373.295	373.295	11.8818	22.2449	21.3618	23.973	17.9173	16.6788	21.5997
SDW10025	(2S)-2-Piperazinecarboxylic acid	C5 H10 N2 O2	131.082	98.9758	0.581979	21.2537	20.4241	19.781	23.0778	23.0771	21.2738
SDW10045	Tetrakis(2-isopropyl-5-methylcyclohexyl)diphosphane	C40 H76 P2	619.551	619.551	14.1817	27.0305	27.2883	27.1704	26.9336	27.5938	27.4379
SDW10048	Unknown	C22 H30 F N3 O10	516.197	150.055	3.08884	18.7008	13.6186	16.2067	13.8821	17.2064	14.1376
SDW10051	Unknown	C10 H26 N4 O4 S	299.175	299.175	11.5359	21.5236	22.0277	21.7484	19.9561	20.3926	20.4599
SDW10074	Unknown	C17 H40 F N7 O5 P2	504.261	461.263	11.3916	20.5761	21.7596	21.0194	16.4532	17.7821	20.6856
SDW10088	Unknown	C18 H18 F5 O2 P3	455.05	455.05	3.17747	16.769	14.723	17.4936	24.6976	17.9588	19.1104
SDW10104	Unknown	C20 H37 N O12	484.241	484.241	10.725	23.5213	23.5345	22.9053	18.0417	19.1801	23.29
SDW10139	Unknown	C36 H48 F2	519.38	519.38	12.3738	20.6695	20.9621	19.6524	22.7963	20.8777	20.0227
SDW10140	Unknown	C30 H40 P2	463.267	463.267	11.8614	22.9719	24.5545	23.6067	19.4266	19.4843	20.1583
SDW10144	Unknown	C11 H19 F3 N2 O11	413.102	413.102	4.6195	15.4051	14.3593	15.554	18.1898	23.5783	17.4498
SDW10160	Unknown	C6 H16 N6 O S	221.117	221.117	8.46044	19.186	18.8859	18.3239	18.7363	18.9346	18.9937
SDW10161	Unknown	C17 H29 F3	291.229	291.229	10.8765	19.2543	20.5853	19.2686	20.1107	18.6597	24.4969
SDW10169	Unknown	C19 H24 F2	291.192	291.192	8.65251	20.0236	22.5168	21.5063	21.9908	22.2411	23.0286
SDW10173	Propoxur	C11 H15 N O3	210.112	210.112	2.26137	16.1055	15.6045	14.5724	16.4131	16.6412	24.6678
[truncated: 658 more rows]

## Sheet: Table S3
Table S3. Metabolites detected in the three fruits and three crops
ID	Compound Name	Chemical Formula	Extracted Mass	Adduct	Retention Time [min]	Fragment	Fragment	Fragment	Fragment	Fragment	Fragment	Fragment	Fragment	Fragment	Class
SDW00007	Betaine	C5 H11 N O2	118.086	M+H	0.752548	58.0659	59.0737	102.055	74.0607	56.0503	103.063	118.129	100.076	58.0806	Alkaloids
SDW00107	Trigonelline	C7 H7 N O2	138.055	M+H	0.796837	94.0656	110.06	92.05	96.0449	67.055	93.0577	65.0393	53.0395	154.05	Alkaloids
SDW02565	Vasicinone	C11 H10 N2 O2	157.076	M+H	1.39448	203.081	130.065	203.052	119.019	185.071	161.029	137.029	131.06	101.009	Alkaloids
SDW00011	DL-Arginine	C6 H14 N4 O2	70.0658	M+H	0.739257	60.0564	116.071	175.119	130.097	158.092	72.0815	112.087	112.076	115.058	Amino acid
SDW00015	D-(+)-Tryptophan	C11 H12 N2 O2	188.07	M+H	2.77548	146.06	118.065	144.081	132.081	159.092	170.06	143.073	142.065	115.054	Amino acid
SDW00018	L-Phenylalanine	C9 H11 N O2	120.081	M+H	1.81009	103.055	131.049	107.049	93.0704	166.086	79.0549	91.0547	149.06	166.072	Amino acid
SDW00034	L-Tyrosine	C9 H11 N O3	136.076	M+H	0.973978	123.044	119.049	91.0548	165.055	147.044	95.0497	182.081	70.6871	121.065	Amino acid
SDW00049	L-Tyrosine	C9 H11 N O3	136.076	M+NH4	1.14989	123.044	119.049	165.055	91.0547	147.044	95.0496	182.081	121.065	103.055	Amino acid
SDW00053	Valine	C5 H11 N O2	72.0815	M+H	1.26802	55.055	118.087	57.0581	59.0737	58.0658	73.0121	87.7885	69.6655	101.627	Amino acid
SDW00055	D-(+)-Proline	C5 H9 N O2	70.0658	M+H	0.81863	116.071	68.0502	70.085	98.0605	74.0243	74.0968				Amino acid
SDW00061	DL-Glutamine	C5 H10 N2 O3	84.045	M+NH4	0.8131	130.05	101.071	56.0503	84.0813	102.055	147.076	85.029	130.086	72.2317	Amino acid
SDW00067	L-Histidine	C6 H9 N3 O2	110.072	M+H	0.783806	156.077	83.0609	95.0608	93.0452	82.0531	68.0502	111.055	81.0452	56.0503	Amino acid
SDW00190	DL-Glutamine	C5 H10 N2 O3	84.045	M+H	0.991912	119.049	130.05	91.0547	147.044	103.055	84.0813	101.071	65.0393	102.055	Amino acid
SDW00222	D-(+)-Proline	C5 H9 N O2	70.0658	M+H	0.9792	116.071	70.2696	74.9381	74.0243	70.2719	97.5087	70.2733	68.0501	98.0601	Amino acid
SDW00229	L-(-)-Methionine	C5 H11 N O2 S	56.0503	M+NH4	0.911872	104.053	61.0114	133.032	102.055	87.0268	150.077	74.0607	74.0243	94.0656	Amino acid
SDW00231	L-Histidine	C6 H9 N3 O2	110.072	M+H	1.23832	156.077	83.0609	95.0608	93.0452	82.0531	132.958	150.969	70.9586	111.055	Amino acid
SDW00805	Asparagine	C4 H8 N2 O3	74.0243	M+NH4	0.74047	87.0559	88.0398	116.034	150.969	70.2209	133.061	70.0295	132.958	133.105	Amino acid
SDW00837	Asparagine	C4 H8 N2 O3	74.0243	M+H	0.829965	87.0558	70.0658	88.0398	116.034	132.905	70.0295	133.061	150.969	116.071	Amino acid
SDW01004	L-Aspartic acid	C4 H7 N O4	74.0243	M+H	0.811174	88.0398	88.0762	71.0498	70.0658	116.034	74.0607	70.0294	56.0503	134.045	Amino acid
SDW02640	L-Aspartic acid	C4 H7 N O4	74.0243	M+H	1.04357	70.0658	88.0762	88.0398	71.0498	134.081	116.071	134.06	88.0221	74.0607	Amino acid
SDW00004	L-Norleucine	C6 H13 N O2	86.097	M+H	1.0303	69.0706	132.102	73.6467	53.7003	64.835	50.048	149.467	58.1364	50.7341	Amino acid derivatives
SDW00084	L-Glutathione (reduced)	C10 H17 N3 O6 S	76.0222	M+NH4	0.876815	179.048	84.045	162.022	116.017	58.9958	233.059	130.05	142.032	144.011	Amino acid derivatives
SDW00085	L-Glutathione (reduced)	C10 H17 N3 O6 S	76.0222	M+H	0.850389	84.0449	179.048	162.022	116.017	58.9958	233.059	130.05	142.032	144.011	Amino acid derivatives
SDW00094	L-Histidine	C6 H9 N3 O2	110.072	M+H	0.659423	156.077	83.061	95.0608	93.0452	82.0531	56.0503	81.0453	68.0502	111.055	Amino acid derivatives
SDW00148	D-(+)-Pyroglutamic Acid	C5 H7 N O3	84.045	M+H	1.27418	84.0813	130.05	56.0503	85.0289	130.086	130.065	102.055	95.0132	70.0658	Amino acid derivatives
SDW00193	Argininosuccinic acid	C10 H18 N4 O6	291.129	M+H	0.824102	70.0658	175.119	60.0564	116.071	112.087	71.0498	115.087	232.081	95.0608	Amino acid derivatives
SDW00237	D-(+)-Proline	C5 H9 N O2	70.0658	M+H	0.696964	116.071	120.02	102.009	138.03	119.019	71.0692	200.815	237.022	183.665	Amino acid derivatives
SDW00283	N6-Acetyl-L-lysine	C8 H16 N2 O3	84.0813	M+NH4	0.810053	126.091	189.123	130.086	143.118	56.0502	112.076	70.066	70.4176	147.112	Amino acid derivatives
SDW00319	2-Phenylglycine	C8 H9 N O2	107.049	M+H	1.19461	135.044	152.07	134.06	106.065	79.0549	109.029	152.034	95.0496	81.0341	Amino acid derivatives
SDW00371	Spermidine	C7 H19 N3	72.0815	M+NH4	0.57903	112.112	84.0814	58.0659	139.018	129.139	75.0923	55.9352	140.021	122.011	Amino acid derivatives
SDW00380	Prolylleucine	C11 H20 N2 O3	229.154	M+H	0.946678	70.0658	142.086	60.0815	58.0659	114.055	124.076	114.091	170.081	59.0737	Amino acid derivatives
SDW00390	D-(+)-Pyroglutamic Acid	C5 H7 N O3	84.045	M+H	0.71679	84.0813	130.05	56.0503	130.086	70.0658	84.0642	85.0289	102.055	71.0736	Amino acid derivatives
SDW00439	4-Guanidinobutyric acid	C5 H11 N3 O2	87.0446	M+H	0.781544	86.0606	146.092	60.0564	104.071	111.056	128.082	69.0342	83.061	146.081	Amino acid derivatives
SDW00440	D-(+)-Pyroglutamic Acid	C5 H7 N O3	84.0813	M+H	1.05216	84.045	130.086	130.05	56.0503	85.029	70.0658	71.0498	130.097	102.055	Amino acid derivatives
SDW00540	Prolylleucine	C11 H20 N2 O3	229.154	M+H	0.808258	70.0658	142.086	60.0816	58.0659	114.055	124.076	114.092	59.0737	170.081	Amino acid derivatives
SDW00689	Spermidine	C7 H19 N3	72.0815	M+NH4	0.880816	112.112	58.0659	84.0813	129.139	84.045	86.0606	75.0923	81.0341	146.081	Amino acid derivatives
SDW00792	2-Phenylglycine	C8 H9 N O2	107.049	M+H	1.50446	135.044	152.07	152.057	134.06	106.065	79.0549	153.04	109.029	135.03	Amino acid derivatives
SDW00896	Prolylleucine	C11 H20 N2 O3	229.154	M+H	1.25139	70.0658	142.086	60.0815	58.0659	114.055	124.076	114.092	170.081	96.0811	Amino acid derivatives
SDW00992	DL-Homoserine	C4 H9 N O3	74.0607	M+H	0.818034	56.0503	102.055	57.0343	84.045	72.0815	70.2332	120.066	120.056	70.2354	Amino acid derivatives
SDW01134	Asparagine	C4 H8 N2 O3	74.0243	M+H	1.29559	87.0559	150.969	72.9378	132.958	87.1004	119.019	88.0399	90.9482	116.035	Amino acid derivatives
SDW01520	N-[9-(alpha-D-Ribofuranosyl)-9H-purin-6-yl]-L-aspartic acid	C14 H17 N5 O8	252.072	M+H	2.95229	162.077	384.114	192.051	136.062	188.056	234.062	206.067	148.062	57.0343	Amino acid derivatives
SDW01783	trans-4-Hydroxy-L-proline	C5 H9 N O3	86.097	M+H	0.819928	69.0706	86.0606	58.0659	132.102	72.3177	68.0501	72.3157	139.27	106.595	Amino acid derivatives
SDW01912	N-[9-(alpha-D-Ribofuranosyl)-9H-purin-6-yl]-L-aspartic acid	C14 H17 N5 O8	252.072	M+H	2.73687	162.077	384.114	136.062	192.051	234.062	188.056	206.067	148.062	57.0343	Amino acid derivatives
SDW01935	L-Glutathione (reduced)	C10 H17 N3 O6 S	76.0222	M+H	0.977159	179.048	84.045	162.022	116.017	58.9958	233.059	130.05	144.011	142.032	Amino acid derivatives
SDW02673	Indole-3-acetyl-L-aspartic acid	C14 H14 N2 O5	130.065	M+H	3.44526	134.045	88.0399	74.0243	116.034	291.097	273.087	199.086	56.9656	161.012	Amino acid derivatives
SDW02688	Υ-Glutamylcysteine	C8 H14 N2 O5 S	84.0449	M+H	0.826678	122.027	130.05	251.069	76.0222	142.032	188.037	234.043	105.001	58.9958	Amino acid derivatives
SDW03200	Cysteinylglycine	C5 H10 N2 O3 S	76.0222	M+H	0.850303	58.9958	116.017	162.022	144.011	86.9904	76.0399	179.022	179.034	88.0221	Amino acid derivatives
SDW08079	Indole-3-acetyl-L-aspartic acid	C14 H14 N2 O5	130.065	M+H	4.43181	134.045	88.0399	98.9757	116.986	56.9656	74.0243	111.044	116.034	134.997	Amino acid derivatives
SDW00035	N-Benzylmethanimine	C8 H9 N	120.081	M+NH4	1.81222	103.055	93.0704	91.0547	95.0496	53.0394	118.065	119.073	79.0548	77.0391	Benzene derivatives
SDW00129	Vorinostat	C14 H20 N2 O3	177.054	M+H	3.95375	145.028	265.154	117.034	248.128	72.0815	149.06	89.1079	89.0391	115.087	Benzene derivatives
SDW00266	3-Phenyl-1-propanol	C9 H12 O	136.062	M+NH4	1.11906	91.0547	119.049	136.075	119.035	137.046	94.0404	107.049	118.065	109.065	Benzene derivatives
SDW00275	4-Hydroxybenzaldehyde	C7 H6 O2	95.0496	M+H	0.879346	123.044	53.0394	105.045	67.055	77.0392	81.0341	55.0187	51.0237	65.0393	Benzene derivatives
SDW00404	2210	C12 H16 O2	150.969	M+H	1.99665	132.958	191.971	90.9481	72.9378	149.961	167.971	209.982	70.9585	105.07	Benzene derivatives
SDW00479	4-Hydroxybenzaldehyde	C7 H6 O2	95.0496	M+H	1.15903	123.055	123.044	53.0394	80.0501	105.045	96.0448	67.055	77.0392	81.0341	Benzene derivatives
SDW00592	N-Butylbenzenesulfonamide	C10 H15 N O2 S	141	M+H	7.34214	95.0496	158.027	53.0394	105.045	57.0707	77.0391	214.089	72.0815	81.0341	Benzene derivatives
SDW00944	4-benzyltoluene	C14 H14	184.073	M+H	0.813625	86.0969	125	60.0815	98.9845	71.0736	104.107	166.05	148.039	58.0657	Benzene derivatives
SDW01122	Pentamethylbenzene	C11 H16	149.023	M+H	9.86074	121.029	65.0393	93.034	121.04	111.044	152.969	134.959	98.0367	57.9355	Benzene derivatives
SDW01466	NP-020705	C17 H24 O8	379.136	M+Na	6.76128	217.083	216.076	185.042	201.052	348.118	308.087	350.096	160.076	349.088	Benzene derivatives
SDW01659	4-Hydroxybenzoic acid	C7 H6 O3	95.0496	M+H	2.82904	121.029	139.039	53.0394	111.044	65.0393	105.045	121.04	67.055	77.0391	Benzene derivatives
SDW02118	(2R,3S,4S,5R,6S)-2-(hydroxymethyl)-6-{4-[(1E)-3-hydroxyprop-1-en-1-yl]-2,6-dimethoxyphenoxy}oxane-3,4,5-triol	C17 H24 O9	395.131	M+Na	4.31265	232.07	233.078	185.042	364.112	217.047	365.12	70.6391	231.062	70.6412	Benzene derivatives
SDW02208	Anisole	C7 H8 O	81.0341	M+H	0.210812	53.0394	109.029	55.0186	67.0549	109.101	109.076	51.0237	81.0704	53.003	Benzene derivatives
SDW02220	4-Methoxybenzaldehyde	C8 H8 O2	137.06	M+H	3.18671	122.036	94.0418	91.0547	66.0471	79.0548	119.049	81.0705	65.0393	109.065	Benzene derivatives
SDW02725	(2E)-3-(4-methoxy-2-{[(2S,3R,4S,5S,6R)-3,4,5-trihydroxy-6-(hydroxymethyl)oxan-2-yl]oxy}phenyl)prop-2-enoic acid	C16 H20 O9	379.1	M+Na	4.14365	185.042	177.054	70.4211	145.028	70.4229	163.018	397.098	147.023	187.018	Benzene derivatives
SDW02990	4-Hydroxybenzaldehyde	C7 H6 O2	95.0496	M+H	1.38391	123.044	123.055	53.0394	67.055	80.0501	105.045	55.0187	81.0341	123.1	Benzene derivatives
SDW03066	cis-Resveratrol	C14 H12 O3	107.049	M+H	6.61337	229.086	135.044	91.0547	119.049	165.07	183.08	120.057	211.075	175.018	Benzene derivatives
SDW03666	Lidocaine	C14 H22 N2 O	86.097	M+H	3.98576	235.18	58.0659	235.169	163.018	221.009	57.0707	139.018	121.008	193.065	Benzene derivatives
SDW03747	(2E)-3-(4-methoxy-2-{[(2S,3R,4S,5S,6R)-3,4,5-trihydroxy-6-(hydroxymethyl)oxan-2-yl]oxy}phenyl)prop-2-enoic acid	C16 H20 O9	379.1	M+H	4.11099	378.964	234.921	217.038	163.018	98.9758	192.911	56.9655	289.075	71.398	Benzene derivatives
SDW04740	3,5-di-tert-Butyl-4-hydroxybenzaldehyde	C15 H22 O2	235.169	M+H	9.25861	57.0707	179.106	123.044	206.988	95.0495	219.137	163.075	161.132	116.986	Benzene derivatives
SDW07217	4-Nitro-N-[4-(4-pyridinylamino)phenyl]benzamide	C18 H14 N4 O3	57.0707	M+H	7.84172	85.0653	85.029	159.101	73.0291	113.024	71.0135	335.133	57.0343	141.018	Benzene derivatives
SDW00639	D-(+)-Maltose	C12 H22 O11	365.105	M+Na	1.0145	203.052	185.042	245.05	70.4284	66.6254	70.43	63.1402	70.4258	208.997	carbohydrate
SDW00998	α-Lactose	C12 H22 O11	85.029	M+H	0.874528	127.039	145.049	97.0289	69.0342	56.0503	198.076	163.06	70.0658	57.0343	carbohydrate
SDW01266	Glucose 1-phosphate	C6 H13 O9 P	98.9846	M+Na	0.824041	85.029	69.0342	127.039	97.0289	99.0445	81.0341	145.049	109.029	70.0658	carbohydrate
SDW01324	D-(+)-Maltose	C12 H22 O11	365.105	M+H	7.69308	203.052	185.042	66.6253	104.993	72.1356	63.1402	221.063	132.639	56.9655	carbohydrate
SDW05398	Naringeninchalcone	C15 H12 O5	153.018	M+H	6.04669	273.075	147.044	119.049	273.167	91.0547	171.029	123.044	107.049	67.0186	Chalcone
SDW01721	4-Methylumbelliferyl-α-D-glucopyranoside	C16 H18 O8	177.054	M+H	5.05184	145.028	117.034	149.06	127.039	81.0341	89.0391	321.096	69.0342	109.029	Coumarin derivatives
SDW03423	4-Methylumbelliferyl-α-D-glucopyranoside	C16 H18 O8	177.054	M+H	6.50917	145.028	117.034	149.06	89.0391	274.975	98.9757	81.0341	321.096	116.986	Coumarin derivatives
SDW05223	4-Methylumbelliferyl-α-D-glucopyranoside	C16 H18 O8	177.054	M+H	5.16922	145.028	117.034	97.0288	149.059	89.039	81.034	339.106	195.065	321.096	Coumarin derivatives
SDW00853	(-)-Epicatechin	C15 H14 O6	139.039	M+H	3.90242	123.044	147.044	165.055	161.06	291.086	207.065	119.049	179.07	95.0496	Flavonoids
SDW01391	5,7-dihydroxy-2-(4-hydroxy-3-methoxyphenyl)-3,4-dihydro-2H-1-benzopyran-4-one	C16 H14 O6	153.018	M+H	6.11717	303.086	177.054	145.028	117.034	171.029	179.034	149.06	89.0391	137.06	Flavonoids
SDW01668	(-)-Epicatechin	C15 H14 O6	139.039	M+H	4.7351	123.044	147.044	165.055	161.06	291.086	207.065	119.049	111.044	151.039	Flavonoids
SDW02787	Myricetin	C15 H10 O8	319.044	M+H	6.12318	153.018	245.044	273.039	217.049	165.018	111.008	137.023	68.9978	179.034	Flavonoids
SDW02944	Tricin 5-O-β-D-glucoside	C23 H24 O12	331.081	M+H	6.85664	315.049	270.052	316.057	287.055	302.042	301.034	242.057	258.052	286.047	Flavonoids
SDW03571	Unknown	C15 H14 O7	139.039	M+H	2.77333	163.039	181.049	151.039	163.018	187.018	195.065	177.054	135.044	175.018	Flavonoids
SDW04454	Unknown	C15 H14 O7	139.039	M+H	3.84169	163.039	181.049	151.039	135.044	195.065	177.055	265.008	159.044	163.018	Flavonoids
SDW04756	2-(hydroxymethyl)-6-{5-[3-(hydroxymethyl)-5-(3-hydroxypropyl)-7-methoxy-2,3-dihydro-1-benzofuran-2-yl]-2-methoxyphenoxy}oxane-3,4,5-triol	C26 H34 O11	545.198	M+Na	6.0807	515.186	70.8332	343.103	380.955	500.155	356.112	527.185	374.119	413.144	Flavonoids
SDW07272	2-(3,4-dihydroxyphenyl)-5,7-dihydroxy-3,4-dihydro-2H-1-benzopyran-4-one	C15 H12 O6	153.018	M+H	5.41411	289.07	163.039	135.044	145.028	98.9758	116.986	117.034	171.029	179.034	Flavonoids
SDW03343	Maritimetin 6- (6"-p-coumarylglucoside)	C30 H26 O13	127.039	M+H	2.71552	139.039	287.055	179.034	123.044	151.039	203.034	275.055	175.039	425.086	Flavonoids
SDW03618	Diosmetin	C16 H12 O6	301.07	M+H	4.85068	301.186	70.0658	286.047	301.14	258.052	116.071	175.119	158.092	112.087	Flavonoids
SDW07442				M+H	15.6675										Flavonoids
SDW08998	6-Hydroxyluteolin 3'-methyl ether 7-sophoroside	C28 H32 O17	303.086	M+H	5.74496	153.018	195.029	171.029	177.055	85.029	345.096	145.028	219.029	141.018	Flavonoids
SDW11725	FL2F3GGS0001_a	C17 H16 O7	207.065	M+H	5.3467	179.07	333.096	127.039	139.039	315.086	151.039	123.044	151.075	167.07	flavonoids
SDW13000	Alpha-Zearalanol	C18 H26 O5		M+H	11.7664										Flavonoids
SDW00097	7-(Î²-D-Glucopyranosyloxy)-2,3-dihydro-2-oxo-1H-indole-3-acetic acid	C16 H19 N O9	162.055	M+H	3.48688	208.06	190.05	85.029	69.0342	97.0288	204.065	127.039	145.049	81.034	Indole derivatives
SDW00282	Indole-3-lactic acid	C11 H11 N O3	118.065	M+H	4.75893	130.065	188.07	160.076	206.081	146.06	170.06	132.081	144.081	131.073	Indole derivatives
SDW00427	4-Indolecarbaldehyde	C9 H7 N O	118.065	M+H	2.77579	91.0547	146.06	117.058	70.5793	128.05	55.9352	70.5817	140.021	146.087	Indole derivatives
SDW00648	Indole	C8 H7 N	118.065	M+H	2.77614	91.0547	118.086	117.058	59.0738	58.0659	65.0393	71.087	109.065	71.0887	Indole derivatives
SDW00691	5-Hydroxyindole-3-acetic acid	C10 H9 N O3	146.06	M+H	4.62669	174.055	128.05	132.044	132.958	150.969	118.065	192.065	133.065	105.07	Indole derivatives
SDW00827	6-Methylindole	C9 H9 N	132.081	M+NH4	2.77841	117.058	115.055	105.07	130.065	131.073	132.044	91.0547	133.065	57.0343	Indole derivatives
SDW01343	Indole-3-acetic acid	C10 H9 N O2	130.065	M+H	5.9701	176.07	120.02	103.055	116.972	119.019	102.009	138.03	148.097	152.969	Indole derivatives
SDW01637	trans-3-Indoleacrylic acid	C11 H9 N O2	146.06	M+H	4.75925	118.065	188.07	144.081	170.06	143.073	142.065	115.054	117.07	91.0547	Indole derivatives
SDW00382	2-[1-[4,5-Dihydroxy-3-[(2S,3R,4S,5S,6R)-3,4,5-trihydroxy-6-(hydroxymethyl)oxan-2-yl]oxyoxan-2-yl]indol-3-yl]acetic acid	C21 H27 N O11	130.065	M+H	4.64962	172.076	144.081	380.133	176.071	434.144	218.081	81.0341	226.086	338.123	Indole derivatives
SDW00859	2-[1-[4,5-Dihydroxy-3-[(2S,3R,4S,5S,6R)-3,4,5-trihydroxy-6-(hydroxymethyl)oxan-2-yl]oxyoxan-2-yl]indol-3-yl]acetic acid	C21 H27 N O11	172.076	M+H	4.09743	130.065	144.081	380.134	244.097	226.086	434.144	262.107	170.06	200.07	Indole derivatives
SDW00003	2-Amino-1,3,4-octadecanetriol	C18 H39 N O3	60.0452	M+H	9.61326	318.3	300.289	282.279	56.0503	55.0551	69.0706	81.0705	95.086	67.055	Lipids
SDW00017	2-Amino-1,3,4-octadecanetriol	C18 H39 N O3	60.0452	M+H	10.0045	318.3	300.289	282.279	56.0503	55.0551	69.0706	57.0707	67.055	95.086	Lipids
SDW00092	Glycerophospho-N-palmitoyl ethanolamine	C21 H44 N O7 P	313.273	M+H	11.2133	62.0608	57.0707	71.0862	282.279	85.1017	95.086	393.239	155.01	98.9846	Lipids
SDW00112	2-Arachidonoyl glycerol	C23 H38 O4	379.281	M+Na	11.7609	337.204	319.194	56.9656	351.221	71.9527	355.215	228.525	220.411	62.1664	Lipids
SDW00113	2-Arachidonoyl glycerol	C23 H38 O4	379.281	M+Na	11.5146	337.204	319.194	70.4873	56.9655	70.4891	351.219	70.4838	166.774	354.736	Lipids
SDW00125	2-Arachidonoyl glycerol	C23 H38 O4	379.281	M+H	11.6136	337.204	319.194	56.9656	71.3927	71.3906	351.22	119.577	204.369	245.8	Lipids
SDW00134	1-Linoleoyl-2-Hydroxy-sn-glycero-3-PC	C26 H50 N O7 P	184.073	M+H	10.7789	86.097	125	60.0815	104.107	98.9845	71.0736	520.339	502.328	67.055	Lipids
SDW00164	Palmitic Acid	C16 H32 O2	274.274	M+H	8.44015	88.0762	70.0658	106.087	57.0707	256.263	102.092	71.0862	85.1017	230.247	Lipids
SDW00172	2,3-Dihydroxypropyl stearate	C21 H42 O4	381.297	M+Na	11.9442	339.22	56.9656	321.21	72.0254	71.9527	357.23	72.0271	87.5943	134.832	Lipids
SDW00192	Glycerophosphocholine	C8 H20 N O6 P	104.107	M+H	0.706462	125	258.11	86.097	184.073	60.0816	98.9845	71.0737	58.0658	199.036	Lipids
SDW00197	MFCD00152656	C18 H37 N O3	60.0452	M+H	9.37087	316.284	298.274	280.263	67.055	81.0705	95.0859	69.0706	55.055	56.0503	Lipids
SDW00212	10,12-TRICOSADIYNOIC ACID	C23 H38 O2	123.044	M+H	12.1676	347.294	55.0551	57.0707	69.0706	137.06	71.0862	83.0862	95.0496	67.055	Lipids
SDW00230	10,12-TRICOSADIYNOIC ACID	C23 H38 O2	123.044	M+H	11.9866	347.294	55.055	69.0706	57.0707	137.06	71.0862	95.0496	67.055	83.0861	Lipids
SDW00236	Palmitic Acid	C16 H32 O2	274.274	M+H	8.29477	88.0762	70.0658	106.087	57.0707	256.263	102.092	71.0862	230.248	85.1017	Lipids
SDW00244	Oleamide	C18 H35 N O	282.279	M+H	11.6274	69.0706	83.0861	57.0707	97.1016	55.0551	81.0705	247.242	95.086	265.252	Lipids
SDW00265	Safingol	C18 H39 N O2	60.0452	M+H	9.88529	284.294	302.305	95.086	81.0705	254.284	67.055	69.0706	55.0551	83.0861	Lipids
SDW00298	2-Aminooctadec-4-yne-1,3-diol	C18 H35 N O2	280.263	M+H	9.35495	67.055	81.0705	55.055	95.086	79.0549	69.0706	82.0657	91.0547	93.0704	Lipids
SDW00318	NP-008882	C27 H48 O9	539.319	M+Na	10.697	104.107	203.052	86.097	70.3395	259.079	70.3418	185.042	60.0815	70.3432	Lipids
SDW00337	2-Amino-1,3,4-octadecanetriol	C18 H39 N O3	318.3	M+H	8.32339	256.263	88.0762	70.0658	102.092	57.0707	71.0862	300.289	58.0659	85.1017	Lipids
SDW00350	2-Amino-1,3,4-octadecanetriol	C18 H39 N O3	318.3	M+H	8.4778	256.263	88.0762	70.0658	102.092	57.0707	300.289	71.0862	58.0659	85.1017	Lipids
SDW00408	Hexadecanamide	C16 H33 N O	256.263	M+H	11.4474	88.0762	57.0707	102.092	74.0607	71.0862	116.107	69.0706	55.055	83.0861	Lipids
SDW00436	α-Eleostearic acid	C18 H30 O2	81.0705	M+H	10.2002	67.055	95.0859	109.101	279.231	123.117	93.0703	79.0548	137.132	55.055	Lipids
SDW00463	γ-Linolenic acid ethyl ester	C20 H34 O2	313.273	M+H	11.8974	57.0707	71.0863	57.0343	95.086	85.1017	81.0705	83.0861	67.055	69.0706	Lipids
SDW00484	γ-Linolenic acid ethyl ester	C20 H34 O2	313.273	M+H	11.6361	57.0707	71.0862	95.0859	57.0343	85.1017	81.0705	83.0861	69.0706	67.055	Lipids
SDW00520	Safingol	C18 H39 N O2	302.305	M+H	9.19333	88.0763	70.0659	106.087	57.0707	284.295	102.092	71.0863	85.1018	58.066	Lipids
SDW00597	NP-020521	C18 H32 O3	319.224	M+H	10.2017	301.213	337.196	73.003	173.075	58.3443	77.5053	311.877	143.921	61.8404	Lipids
SDW00696	Lauryldimethylamine oxide	C14 H31 N O	230.248	M+H	8.5682	57.0707	62.0608	71.0862	212.237	85.1017	58.066	230.102	55.0551	98.0604	Lipids
SDW00723	O-Arachidonoyl ethanolamine	C22 H37 N O2	348.287	M+Na	11.5629	70.9883	104.993	268.158	97.5048	95.0309	141.322	51.8263	135.629	241.027	Lipids
SDW00748	Oleamide	C18 H35 N O	282.279	M+H	11.7982	69.0706	83.0861	55.055	57.0707	97.1016	81.0704	247.242	265.252	95.0859	Lipids
SDW00775	Octyl decyl phthalate	C26 H42 O4	441.297	M+H	12.7037	315.156	171.005	135.003	104.993	175.045	315.174	279.038	116.986	73.0285	Lipids
SDW00819	1-Linoleoyl glycerol	C21 H38 O4	337.273	M+H	11.0582	81.0705	67.055	95.086	69.0706	55.0551	109.101	57.0343	83.0861	79.0549	Lipids
SDW00824	γ-Linolenic acid ethyl ester	C20 H34 O2	313.273	M+H	11.3936	57.0707	71.0862	95.086	57.0343	85.1017	81.0705	83.0861	67.055	69.0706	Lipids
SDW00890	5-[(Z)-Pentadec-8-enyl]benzene-1,3-diol	C21 H34 O2	123.044	M+H	11.4379	319.263	55.055	69.0706	57.0707	137.06	83.0861	95.0496	67.055	71.0862	Lipids
SDW00939	5-[(Z)-Pentadec-8-enyl]benzene-1,3-diol	C21 H34 O2	123.044	M+H	11.6245	319.263	55.0551	69.0706	57.0707	137.06	95.0496	67.055	83.0861	71.0862	Lipids
SDW00962	2-{(2-Hydroxyethyl)[3-(tridecyloxy)propyl]nitroryl}ethanol	C20 H43 N O4	362.326	M+H	8.49609	300.289	256.263	70.0658	88.0762	57.0707	146.117	132.102	102.092	86.097	Lipids
SDW01166	Sphingosine (d18:1)	C18 H37 N O2	322.271	M+Na	11.387	322.174	71.1843	340.185	80.9484	144.655	199.303	56.9655	99.9202	60.9584	Lipids
SDW01306	Hexadecanamide	C16 H33 N O	256.263	M+H	11.2793	88.0762	57.0707	102.092	74.0607	71.0862	69.0706	116.107	55.055	83.0861	Lipids
SDW01458	γ-Linolenic acid ethyl ester	C20 H34 O2	313.273	M+H	11.5145	57.0707	71.0862	57.0343	95.086	85.1017	81.0705	83.0861	67.055	69.0706	Lipids
SDW01464	γ-Linolenic acid ethyl ester	C20 H34 O2	313.273	M+H	10.9937	57.0707	71.0863	57.0343	85.1017	95.086	81.0705	67.055	83.0861	109.101	Lipids
SDW01541	Lauryldimethylamine oxide	C14 H31 N O	230.248	M+H	8.4249	57.0707	62.0608	71.0862	212.237	85.1018	58.066	230.102	98.0605	69.0707	Lipids
SDW01560	(+/-)12(13)-DiHOME	C18 H34 O4	71.0862	M+H	9.58438	99.0809	279.232	81.0705	67.055	95.086	147.117	113.096	85.1018	261.221	Lipids
SDW01574	TREPROSTINIL HEXADECYL ESTER	C39 H66 O5	615.497	M+H	13.5412	81.0705	67.055	95.0859	93.0703	79.0548	69.0706	55.055	107.086	109.101	Lipids
SDW01605	1-Linoleoyl glycerol	C21 H38 O4	337.273	M+H	13.9269	81.0705	67.055	95.086	55.0551	69.0706	109.101	57.0343	83.0861	93.0704	Lipids
SDW01711	Monoolein	C21 H40 O4	69.0706	M+H	11.6594	81.0704	121.101	95.0859	55.055	83.0861	67.0549	247.242	135.117	265.252	Lipids
SDW01755	α-Linolenic acid	C18 H30 O2	81.0704	M+H	11.4227	67.055	95.0859	98.9757	109.101	279.232	116.986	177.007	158.996	123.117	Lipids
SDW01824	3,5-Heptadiyn-2-one	C7 H6 O	79.0548	M+H	1.82435	107.049	95.0496	53.0394	105.045	91.0548	64.9554	77.0392	124.976	106.965	Lipids
SDW01964	NP-020521	C18 H32 O3	81.0705	M+H	10.5548	67.055	95.086	279.232	98.9758	109.101	93.0704	69.0706	79.0549	116.986	Lipids
SDW02184	NP-014287	C18 H32 O3	319.224	M+Na	10.3704	60.0452	319.303	301.293	283.282	61.0485	56.0502	337.204	55.0549	69.0706	Lipids
SDW02200	γ-Linolenic acid ethyl ester	C20 H34 O2	313.273	M+H	13.8399	57.0707	71.0862	57.0343	95.086	85.1017	81.0705	83.0861	67.055	109.101	Lipids
SDW02251	1,1'-(Octylimino)dipropan-2-ol	C14 H31 N O2	246.242	M+H	7.43729	88.0762	70.0659	106.087	57.0707	228.232	102.092	71.0863	246.11	85.1017	Lipids
SDW02252	1,1'-(Octylimino)dipropan-2-ol	C14 H31 N O2	246.242	M+H	7.58802	88.0762	70.0658	106.087	57.0707	228.232	102.092	71.0862	85.1018	202.216	Lipids
SDW02494	PALMITAMIDOHEXADECANEDIOL	C32 H65 N O3	512.503	M+H	12.0462	283.263	256.263	88.0763	57.0707	102.092	70.0659	71.0863	85.1018	274.274	Lipids
SDW02824	γ-Linolenic acid ethyl ester	C20 H34 O2	313.273	M+H	14.2403	57.0707	71.0862	57.0343	95.086	85.1017	62.9825	81.0705	83.0861	67.055	Lipids
SDW02920	γ-Linolenic acid ethyl ester	C20 H34 O2	313.273	M+H	11.2756	57.0707	71.0862	57.0343	95.086	85.1017	81.0705	83.0861	67.055	109.101	Lipids
SDW02963	5-OxoETE	C20 H30 O3	301.216	M+H	8.97354	283.206	147.08	133.101	119.085	121.101	105.07	319.226	175.148	123.117	Lipids
SDW02994	5-(1,2,4a,5-tetramethyl-7-oxo-1,2,3,4,4a,7,8,8a-octahydronaphthalen-1-yl)-3-methylpentanoic acid	C20 H32 O3	343.224	M+Na	9.10598	240.232	95.0165	71.8322	278.968	71.0861	325.215	57.0707	81.0705	83.0859	Lipids
SDW03053	1-Linoleoyl glycerol	C21 H38 O4	337.273	M+H	14.3296	81.0704	67.055	95.0859	69.0706	55.055	341.253	109.101	83.0861	57.0343	Lipids
SDW03203	γ-Linolenic acid ethyl ester	C20 H34 O2	313.273	M+H	14.0032	57.0707	71.0862	57.0343	95.0859	85.1017	81.0705	83.0861	62.9825	67.0549	Lipids
SDW03363	Docosahexaenoic acid methyl ester	C23 H34 O2	349.271	M+Na	11.387	317.178	335.189	56.9656	349.183	104.993	128.986	266.975	146.997	71.4211	Lipids
SDW03381	5-[(10Z)-14-(3,5-dihydroxyphenyl)tetradec-10-en-1-yl]benzene-1,3-diol	C26 H36 O4	413.266	M+H	12.502	301.141	104.993	189.016	413.321	81.0705	249	95.086	153.055	175.045	Lipids
SDW03456	α-Eleostearic acid	C18 H30 O2	67.055	M+H	10.3426	81.0704	95.0859	104.993	279.231	109.101	149.023	123.117	98.9757	79.0548	Lipids
SDW03696	Docosahexaenoic acid methyl ester	C23 H34 O2	349.271	M+Na	11.142	317.178	335.189	56.9656	349.183	104.993	110.976	72.1715	72.1696	128.986	Lipids
SDW03915	Hexadecanamide	C16 H33 N O	256.263	M+H	8.54534	88.0763	57.0707	70.0659	102.092	71.0863	85.1017	58.0659	256.078	86.0606	Lipids
SDW04107	Diundecyl phthalate	C30 H50 O4	497.36	M+H	10.4772	515.371	104.107	73.002	86.0971	95.0861	255.35	476.868	215.746	74.3076	Lipids
SDW04342	2-Oxiranylmethyl (9Z,12Z,15Z)-9,12,15-octadecatrienoate	C21 H34 O3	335.257	M+H	10.4613	67.055	81.0705	95.086	93.0704	79.0549	57.0343	55.0551	69.0706	109.101	Lipids
SDW04411	4-decyl-3-hydroxy-5-oxooxolane-2,3-dicarboxylic acid	C16 H26 O7	353.156	M+H	5.23403	203.052	93.0703	201.037	293.099	70.2371	143.019	59.05	335.145	161.029	Lipids
SDW04547	(12Z)-9,10,11-trihydroxyoctadec-12-enoic acid	C18 H34 O5	353.229	M+H	8.7138	353.145	91.0547	353.103	371.228	231.107	213.097	335.203	56.9656	243.144	Lipids
SDW05478	Di(2-ethylhexyl) phthalate	C24 H38 O4	149.023	M+H	12.4841	71.0863	57.0707	167.034	62.9825	104.993	121.029	70.8331	226.988	150.977	Lipids
SDW07215	Ethyl palmitoleate	C18 H34 O2	283.282	M+H	11.8902	69.0706	57.0707	55.055	97.1016	83.0861	71.0863	95.086	81.0705	93.0704	Lipids
SDW07407	NP-002322	C18 H32 O4	335.219	M+H	10.1731	247.13	335.257	70.7049	195.099	67.055	95.0859	70.7029	81.0704	335.188	Lipids
SDW08937	(2S,3R,4S,5S,6R)-2-(4,6-dihydroxy-2-nonyl-3-{[(2S,3R,4S,5S,6R)-3,4,5-trihydroxy-6-(hydroxymethyl)oxan-2-yl]oxy}phenoxy)-6-(hydroxymethyl)oxane-3,4,5-triol	C27 H44 O14	615.262	M+H	3.90232	453.209	435.199	70.4727	131.244	273.145	291.156	333.167	70.0656	86.0604	Lipids
SDW01277	Diosgenin	C27 H42 O3	253.195	M+H	10.7503	397.31	69.0706	147.117	159.117	105.07	81.0705	157.101	215.179	145.101	Lipids
SDW00169	Adenosine	C10 H13 N5 O4	136.062	M+H	2.33922	268.104	57.0343	119.035	85.0289	55.0187	73.029	94.0405	137.046	115.039	Nucleotide
SDW00256	Adenine	C5 H5 N5	136.062	M+NH4	1.13737	91.0548	119.049	119.035	136.075	137.046	94.0405	107.05	118.065	109.065	Nucleotide
SDW00362	Adenosine	C10 H13 N5 O4	136.062	M+H	2.21288	268.104	57.0343	119.035	152.056	137.046	55.0187	85.029	73.029	69.0341	Nucleotide
SDW00703	Adenine	C5 H5 N5	136.062	M+H	2.32368	119.035	137.046	94.0405	136.022	109.051	136.112	92.0247	112.051	67.0299	Nucleotide
SDW00886	Adenosine 5'-monophosphate	C10 H14 N5 O7 P	136.062	M+H	0.885323	97.0289	348.07	137.046	69.0343	119.035	98.9847	250.094	72.574	72.0814	Nucleotide
SDW01056	Adenosine 5'-monophosphate	C10 H14 N5 O7 P	136.062	M+H	1.05419	97.0288	348.07	137.046	69.0342	119.035	98.9845	186.076	250.093	71.7952	Nucleotide
SDW01064	Guanosine	C10 H13 N5 O5	152.056	M+H	1.36934	153.04	135.03	110.035	128.045	136.062	109.051	57.0342	284.099	55.0186	Nucleotide
SDW01147	Uracil	C4 H4 N2 O2	113.035	M+H	1.18715	70.0294	96.0084	113.024	95.0245	67.055	68.0138	95.0132	67.0186	57.0343	Nucleotide
SDW01252	Guanine	C5 H5 N5 O	152.057	M+H	1.63079	153.04	107.049	135.03	152.07	135.044	110.035	134.06	152.034	106.065	Nucleotide
SDW01348	Acycloguanosine	C8 H11 N5 O3	152.057	M+H	1.63566	153.041	135.03	110.035	226.093	128.046	75.0448	109.051	164.057	140.045	Nucleotide
SDW01349	2'-Deoxyadenosine	C10 H13 N5 O3	136.062	M+H	2.50564	117.055	252.109	99.0445	73.0291	71.0498	119.035	137.046	81.034	69.0342	Nucleotide
SDW01437	Guanosine	C10 H13 N5 O5	152.057	M+H	1.82772	153.041	135.03	136.062	110.035	128.046	109.051	57.0343	55.0187	284.099	Nucleotide
SDW02096	Thymine	C5 H6 N2 O2	127.05	M+H	2.33704	110.024	84.045	109.04	127.039	109.029	82.0293	81.0341	56.0499	54.0342	Nucleotide
SDW02498	S-Adenosylmethionine	C15 H22 N6 O5 S	136.062	M+H	0.781676	250.093	97.0288	102.055	56.0503	298.096	69.0342	74.0607	61.0114	74.0243	Nucleotide
SDW03354	Cytosine	C4 H5 N3 O	112.051	M+H	0.80296	95.0244	70.0658	69.0455	112.04	94.0405	112.087	95.0608	96.0448	84.045	Nucleotide
SDW05293	N,N'-Diphenylguanidine	C13 H13 N3	212.118	M+H	4.47049	119.061	94.0656	195.092	92.05	95.0496	212.092	53.0394	194.081	77.0393	Nucleotide
SDW05536	2'-O-Methyladenosine	C11 H15 N5 O4	136.062	M+H	2.98574	282.119	69.0343	101.06	212.031	57.0343	97.0289	85.029	87.0447	59.0499	Nucleotide
SDW00096	D-(+)-Pipecolinic acid	C6 H11 N O2	84.0813	M+NH4	0.865988	84.045	130.086	130.05	56.0503	85.0289	102.055	70.0658	95.0132	69.0343	Organic acid
SDW00488	Sinapinic acid	C11 H12 O5	175.039	M+H	4.71535	119.049	91.0547	147.044	207.065	192.041	149.023	132.021	118.042	179.07	Organic acid
SDW00811	ANHYDROMETHYLENECITRIC ACID	C7 H8 O7	261.03	M+H	0.650452	219.02	177.009	243.02	119.019	101.009	217.041	225.008	201.009	158.999	Organic acid
SDW00987	2,3,4,9-Tetrahydro-1H-β-carboline-3-carboxylic acid	C12 H12 N2 O2	144.081	M+H	3.5019	217.097	74.0243	171.092	130.065	143.073	156.081	132.081	173.107	129.07	Organic acid
SDW02183	Ferulic acid	C10 H10 O4	177.054	M+H	4.14194	145.028	117.034	149.06	89.0391	163.018	181.028	163.039	135.044	195.087	Organic acid
SDW00043	2,3-Difluoro-4-methoxyphenol	C7 H6 F2 O2	119.019	M+H	0.627189	101.009	137.029	179.04	161.029	82.9982	133.035	121.023	142.035	143.019	phenol
SDW00048	2,3-Difluoro-4-methoxyphenol	C7 H6 F2 O2	119.019	M+H	0.311007	101.009	137.029	161.029	179.04	82.9983	124.939	113.024	133.035	160.96	phenol
SDW03017	5-{(2R,3S)-6-Hydroxy-2-(4-hydroxyphenyl)-4-[(E)-2-(4-hydroxyphenyl)vinyl]-2,3-dihydro-1-benzofuran-3-yl}-1,3-benzenediol	C28 H22 O6	107.049	M+H	6.14451	361.106	267.065	349.106	239.07	251.07	199.075	255.065	197.059	215.07	phenol
SDW00076	Picolinic acid N-oxide	C6 H5 N O3	98.9758	M+H	0.894575	121.04	139.058	116.986	134.996	139.05	139.039	56.9656	68.9979	111.044	Pyridine derivatives
SDW00062	N-Methyl-2-pyrrolidone	C5 H9 N O	100.076	M+H	2.12299	58.0295	69.0342	82.0657	98.0604	71.0498	70.0658	72.0815	58.0658	56.0502	Pyrrolidine
SDW00616	8-Hydroxy-7-nitroso-5-quinolinesulfonic acid	C9 H6 N2 O5 S	155.081	M+H	0.883744	114.055	256.129	83.061	127.05	86.0606	97.0765	127.087	56.0503	109.076	Quinoline derivatives
SDW00653	1,5-Isoquinolinediol	C9 H7 N O2	162.055	M+H	3.48951	116.05	144.044	134.06	89.039	106.065	91.0547	107.049	120.02	79.0549	Quinoline derivatives
SDW00958	1,5-Isoquinolinediol	C9 H7 N O2	162.055	M+H	3.81075	116.05	144.044	134.06	89.0391	106.065	91.0547	120.02	107.049	79.0548	Quinoline derivatives
SDW00995	2-Hydroxyquinoline	C9 H7 N O	146.06	M+H	4.62826	128.049	118.065	91.0547	129.045	55.9352	140.021	119.049	95.0495	139.018	Quinoline derivatives
SDW00208	Cardanolide	C23 H36 O2	123.044	M+H	11.8032	163.075	345.278	69.0706	149.06	55.055	83.0861	137.06	104.993	97.1016	Terpenoids
SDW00225	Cardanolide	C23 H36 O2	123.044	M+H	11.6349	163.075	345.278	69.0706	55.0551	149.06	83.0861	137.06	104.993	67.055	Terpenoids
SDW01330	Oleanolic acid	C30 H48 O3	203.179	M+H	11.7109	191.179	95.086	189.163	119.086	107.086	121.101	133.101	439.356	109.101	Terpenoids
SDW00490	Pyridoxine	C8 H11 N O3	152.07	M+H	0.984608	134.06	170.081	124.076	96.0812	82.0657	79.0548	81.0704	106.065	84.045	Vitamins
SDW00922	5'-O-beta-D-Glucosylpyridoxine	C14 H21 N O8	108.081	M+H	0.917291	152.07	332.133	314.123	124.076	136.076	134.06	85.029	170.081	69.0342	Vitamins
SDW01023	Nicotinic acid	C6 H5 N O2	124.039	M+H	0.918979	80.0501	96.0448	119.019	78.0344	96.0529	137.029	124.076	53.0393	101.009	Vitamins
SDW01057	Nicotinamide	C6 H6 N2 O	123.055	M+H	1.48661	80.0501	96.0448	124.039	106.029	95.0496	123.044	67.055	78.0344	53.0393	Vitamins
SDW01811	Thiamine	C12 H16 N4 O S	122.071	M+H	0.70639	144.048	81.0453	84.0814	147.113	130.086	265.111	202.107	126.037	163.018	Vitamins
SDW01812	5'-O-beta-D-Glucosylpyridoxine	C14 H21 N O8	108.081	M+H	1.12838	152.07	332.133	314.123	124.076	136.076	134.06	170.081	85.029	69.0342	Vitamins
SDW12986	Miquelianin	C21 H18 O13	303.049	M+H	6.44679	85.029	73.0291	153.018	229.049	113.024	131.034	137.023	257.044	165.018	Others
SDW00006	2-Mercaptoethanol	C2 H6 O S	79.0218	M+H	0.859398	63.9985	61.0114	62.0192	62.9907	59.9672	82.0088	83.0023	73.8641	108.351	Others
SDW00009	6-Methoxyquinoline	C10 H9 N O	160.076	M+H	1.6745	132.081	115.054	117.057	105.07	133.065	142.065	159.068	143.073	67.0424	Others
SDW00016	trans-3-Indoleacrylic acid	C11 H9 N O2	146.06	M+H	2.77567	118.065	144.081	188.07	143.073	170.06	142.065	115.055	117.07	91.0547	Others
SDW00021	N-Benzyl-3-(triisopropylsilyl)-N-[3-(triisopropylsilyl)-2-propyn-1-yl]-2-propyn-1-amine	C31 H53 N Si2	104.107	M+H	11.1891	184.073	86.097	125	496.339	60.0816	478.329	71.0737	57.0707	98.9846	Others
SDW00024	Choline	C5 H13 N O	104.107	M+H	1.12358	60.0816	58.0659	59.0737	87.0446	61.0114	56.0503	72.1192	69.0343	62.9298	Others
SDW00027	Allopurinol	C5 H4 N4 O	91.0548	M+H	0.916531	119.049	137.06	65.0393	109.065	81.0705	79.0548	94.0418	107.049	92.0582	Others
SDW00030	Choline	C5 H13 N O	104.107	M+H	0.762252	60.0815	58.0659	59.0737	72.9812	86.0969	55.6865	98.3268	59.3916	65.1509	Others
SDW00054	Furfuranol	C5 H6 O2	56.9656	M+H	0.858349	98.9758	116.986	71.9526	134.996	72.5466	51.1944	153.007	123.503	61.395	Others
SDW00059	N1-(3-chlorophenyl)-2-[2-(trifluoromethyl)-4-quinolyl]hydrazine-1-carboxamide	C17 H12 Cl F3 N4 O	381.079	M+H	0.712683	219.027	201.016	71.9635	71.9616	96.7865	118.332	120.68	216.751	242.593	Others
SDW00071	[Similar to: 2-{2-[(2Z)-pent-2-en-1-yl]-3-{[3,4,5-trihydroxy-6-(hydroxymethyl)oxan-2-yl]oxy}cyclopentyl}acetic acid; ΔMass: -256.1822 Da]		119.019	M+H	0.626947	137.029	101.009	72.5363	116.604	59.7329	50.2753	114.576	58.3596	98.8603	Others
SDW00078	2-Mercaptoethanol	C2 H6 O S	79.0218	M+H	1.07438	63.9985	61.0114	62.0193	79.0548	62.9907	95.0496	53.0394	97.008	78.9976	Others
SDW00086	N-Benzyl-3-(triisopropylsilyl)-N-[3-(triisopropylsilyl)-2-propyn-1-yl]-2-propyn-1-amine	C31 H53 N Si2	104.107	M+H	10.9595	184.073	86.097	496.339	125	60.0816	478.329	71.0737	57.0707	98.9846	Others
SDW00109	Furfural	C5 H4 O2	97.0289	M+H	1.22499	69.0342	71.0135	53.003	51.0238	97.0651	55.0186	68.9979	50.0159	79.0549	Others
SDW00122	N-Benzyl-3-(triisopropylsilyl)-N-[3-(triisopropylsilyl)-2-propyn-1-yl]-2-propyn-1-amine	C31 H53 N Si2	104.107	M+H	11.4887	184.073	86.097	496.339	125	60.0815	478.329	71.0736	57.0707	98.9845	Others
SDW00147	1-Oxo-2,3-dihydro-1H-phospholium	C4 H6 O P	119.019	M+H	0.628505	101.009	82.9983	58.9616	58.9984	84.8282	71.9057	115.024	71.9038	100.972	Others
SDW00151	Furfural	C5 H4 O2	97.0288	M+H	0.83341	69.0342	71.0135	53.003	51.0238	55.0187	68.9978	50.0159	53.9983	53.0394	Others
SDW00157	3134	C7 H11 N S	119.019	M+H	0.642427	101.009	137.029	82.9983	133.035	121.023	142.035	161.029	151.045	147.05	Others
SDW00158	2-Mercaptoethanol	C2 H6 O S	79.0219	M+H	1.28204	63.9985	61.0114	62.0193	62.9907	56.9656	59.9672	62.9923	100.029	151.943	Others
SDW00161	5-Hydroxymethyl-2-furaldehyde	C6 H6 O3	109.029	M+H	0.838647	81.0341	69.0342	53.0394	127.039	55.0187	99.0444	71.0498	85.0289	97.0289	Others
SDW00176	Bisazir	C5 H12 N3 P S	119.019	M+H	0.639695	161.029	179.04	101.009	137.029	82.9982	143.018	132.958	104.964	150.969	Others
SDW00214	NP-008882	C27 H48 O9	539.318	M+Na	10.9033	203.052	259.079	185.042	104.107	377.266	86.0969	72.9016	81.0704	518.916	Others
SDW00215			55.055	M+NH4	0.812303	72.0815	57.0581	56.0503	53.0394	53.003	53.7148	56.673	61.5278	60.8733	Others
SDW00216			121.017	M+H	0.625307	98.9758	116.986	103.006	139.027	56.9656	134.996	121.023	71.9525	84.9958	Others
SDW00220	Furfuranol	C5 H6 O2	56.9656	M+H	1.21502	98.9758	116.986	98.9845	99.0444	71.9526	134.996	71.0499	53.0394	69.0342	Others
SDW00223		C26 H51 F3 N O5 P	104.107	M+H	11.807	487.279	86.0969	546.352	146.982	57.0707	341.304	60.0815	71.0862	71.0736	Others
SDW00234			56.9656	M+H	0.630002	98.9757	116.986	71.9525	134.996	153.007	74.976	54.9862	70.9812	131.002	Others
SDW00261	5-hydroxy-4-methoxy-5,6-dihydro-2H-pyran-2-one	C6 H8 O4	85.0289	M+H	0.856278	69.0342	99.0444	97.0288	57.0343	55.0187	127.039	71.0498	81.0341	145.049	Others
SDW00277	3-Fluorodihydro-2(3H)-furanone	C4 H5 F O2	105.07	M+H	2.28694	79.0548	103.055	95.0496	53.0394	105.045	77.0392	51.0237	81.034	72.9378	Others
SDW00471	methyl 4-oxo-4H-benzo[4,5]imidazo[2,1-b][1,3]thiazine-2-carboxylate	C12 H8 N2 O3 S	261.03	M+H	0.629477	219.02	243.02	177.009	119.019	101.009	225.008	217.04	201.009	98.9757	Others
SDW00487	NP-001346	C11 H15 N5 O3 S	136.062	M+H	4.23994	61.0114	298.096	75.0269	145.032	97.0289	163.042	119.035	103.021	69.0343	Others
SDW00546	(2E,2'E)-N,N'-1,4-Butanediylbis[3-(4-hydroxyphenyl)acrylamide]	C22 H24 N2 O4	147.044	M+H	7.07958	235.144	119.049	91.0547	218.117	72.0815	89.1078	381.18	261.123	65.0392	Others
SDW00617	ETHYL 2-(HYDROXYIMINO)-6-NITROHEXANOATE	C8 H14 N2 O5	90.0555	M+H	2.36039	220.118	202.107	184.097	124.076	98.0241	116.034	72.0451	85.0654	103.076	Others
SDW00742	Sotrastaurin	C25 H22 N6 O2	147.044	M+H	5.99768	204.102	438.238	292.201	72.0815	119.049	275.175	274.191	91.0547	203.118	Others
SDW01115	Cyclopenta[c]pyran-7-carbaldehyde	C9 H6 O2	119.049	M+H	1.11859	91.0547	147.044	103.055	65.0393	84.0814	150.969	104.964	132.958	104.908	Others
SDW01139	ETHYL 2-(HYDROXYIMINO)-6-NITROHEXANOATE	C8 H14 N2 O5	90.0554	M+H	2.21844	220.118	202.107	184.097	124.076	98.024	116.034	72.0451	85.0653	103.076	Others
SDW01157	Flurazepam	C21 H23 Cl F N3 O	85.029	M+NH4	5.84794	105.019	127.039	87.0082	69.0343	97.0289	145.049	231.05	109.029	81.0341	Others
SDW01225	2-(3,5-Dinitrophenyl)-5-[4-(2-methyl-2-propanyl)phenyl]-1,3,4-oxadiazole	C18 H16 N4 O5	207.065	M+H	6.88025	175.039	119.049	147.044	91.0547	69.0342	127.039	351.107	157.04	81.0341	Others
SDW01232	6-[(2E,6E)-7-(5-hydroxy-3-methyl-2-oxocyclopent-3-en-1-yl)-6-methylhepta-2,6-dien-2-yl]-3-methyl-5,6-dihydro-2H-pyran-2-one	C20 H26 O4	353.172	M+Na	8.63106	309.182	91.0548	72.0162	371.181	62.9827	302.251	56.9656	122.308	55.1449	Others
SDW01264	2-(3,5-Dinitrophenyl)-5-[4-(2-methyl-2-propanyl)phenyl]-1,3,4-oxadiazole	C18 H16 N4 O5	207.065	M+H	6.4868	175.039	119.049	147.044	91.0547	179.07	157.039	97.0289	369.117	132.02	Others
SDW01331	5-[(10Z)-14-(3,5-dihydroxyphenyl)tetradec-10-en-1-yl]benzene-1,3-diol	C26 H36 O4	413.266	M+Na	12.0354	301.141	189.016	171.005	104.993	175.045	70.2271	56.9655	249.002	70.2249	Others
SDW01463	3134	C7 H11 N S	119.019	M+H	0.117404	101.009	137.029	82.9982	133.035	121.023	143.034	142.035	161.03	147.05	Others
SDW01485	Unknown	C14 H12 O3	229.086	M+H	5.73684	107.049	135.044	91.0547	119.049	165.07	183.08	120.057	211.075	175.018	Others
SDW01789	Butafenacil	C20 H18 Cl F3 N2 O6	345.13	M+H	3.06245	132.044	302.124	474.173	259.119	151.061	284.114	134.06	194.067	257.103	Others
SDW02052	(4alpha,5alpha,12R)-3-Hydroxy-12,13-epoxytrichothecane-4,15-diyl diacetate	C19 H28 O7	207.065	M+H	4.04371	177.054	175.039	119.049	147.044	145.028	91.0547	69.0342	117.034	127.039	Others
SDW02444	6-methyl-8-{[5-(2-naphthyl)-1,3,4-oxadiazol-2-yl]methoxy}[1,2,4]triazolo[4,3-b]pyridazine	C19 H14 N6 O2	359.131	M+Na	2.49505	197.078	119.019	143.019	239.076	203.052	377.129	161.029	101.009	85.029	Others
SDW02820	NP-020014	C15 H26 O3	277.179	M+H	9.17347	235.169	57.0707	179.107	219.138	123.044	163.075	217.158	177.127	118.972	Others
SDW02862	NP-015904	C21 H34 O11	485.199	M+Na	5.12112	335.094	333.079	425.141	485.081	59.0499	93.0703	353.156	222.02	131.049	Others
SDW02889	NP-020014	C15 H26 O3	235.169	M+H	9.2993	277.179	57.0707	179.106	219.138	123.044	217.158	118.972	63.7201	163.075	Others
SDW02897	2-(3,5-Dinitrophenyl)-5-[4-(2-methyl-2-propanyl)phenyl]-1,3,4-oxadiazole	C18 H16 N4 O5	207.065	M+H	6.13961	175.039	119.049	147.044	351.107	91.0547	81.0341	69.0342	85.0289	109.029	Others
SDW02922	benzyl N-(1-{[(3,4-dimethoxyphenethyl)amino]carbonyl}-2-methylpropyl)carbamate	C23 H30 N2 O5	453.173	M+Na	5.68065	307.115	221.983	87.1005	285.476	122.925	361.357	59.4303	80.9936	88.0758	Others
SDW03159	(2S,3R,4S,5S,6R)-2-{4-[(1S,3aR,4S,6aR)-4-(4-hydroxy-3,5-dimethoxyphenyl)-hexahydrofuro[3,4-c]furan-1-yl]-2,6-dimethoxyphenoxy}-6-(hydroxymethyl)oxane-3,4,5-triol	C28 H36 O13	603.204	M+Na	6.29379	441.151	177.055	440.143	185.042	145.028	425.121	265.154	309.095	117.034	Others
SDW03243	Orbofiban	C17 H23 N5 O4	235.075	M+H	2.64122	298.107	252.102	239.07	343.128	207.08	281.08	297.123	361.139	183.08	Others
SDW03358	2-(3,5-Dinitrophenyl)-5-[4-(2-methyl-2-propanyl)phenyl]-1,3,4-oxadiazole	C18 H16 N4 O5	207.065	M+H	4.47984	175.039	119.049	147.044	91.0547	69.0342	127.039	369.117	351.107	179.07	Others
SDW03652	NP-006862	C20 H32 O4	359.216	M+H	9.57251	229.117	104.993	341.207	118.972	377.214	72.2178	62.9824	135.003	216.993	Others
SDW03713	1,3-Benzodioxolylbutanamine (BDB)	C11 H15 N O2	135.044	M+H	0.913472	194.117	58.0659	107.049	194.082	130.022	59.0737	166.086	71.2695	140.006	Others
SDW03851	Cyclohexamide	C15 H23 N O4	136.062	M+H	3.46544	162.041	281.099	120.066	119.035	137.046	74.0607	102.055	56.0503	98.9757	Others
SDW04351	1,3-Thiasilinane	C4 H10 S Si	119.086	M+H	8.87201	91.0548	117.07	104.062	103.055	79.0549	93.0704	115.055	95.0497	104.964	Others
SDW04358	Cyclohexamide	C15 H23 N O4	136.062	M+H	3.31593	162.041	281.099	120.066	91.0547	119.035	137.046	99.0444	74.0607	81.0341	Others
SDW05360	(2S,3S,4R,5R)-4-hydroxy-2,5-bis(hydroxymethyl)-2-{[(2R,3R,4S,5S,6R)-3,4,5-trihydroxy-6-(hydroxymethyl)oxan-2-yl]oxy}oxolan-3-yl (2E)-3-(4-hydroxy-3,5-dimethoxyphenyl)prop-2-enoate	C23 H32 O15	571.163	M+H	5.14837	409.11	203.052	185.042	391.1	120.01	124.039	71.8799	147.044	175.039	Others
SDW06137	NP-020903	C20 H25 Cl O7	451.099	M+Na	8.66916	177.054	145.028	71.1762	70.0658	408.97	109.029	147.044	326.967	254.946	Others
SDW06845	Nitrosoheptamethyleneimine	C7 H14 N2 O	143.118	M+H	0.941579	98.0968	143.034	119.019	72.0814	125.107	126.091	125.023	97.0288	137.029	Others
SDW07145	(2S,3S,4R,5R)-4-hydroxy-2,5-bis(hydroxymethyl)-2-{[(2R,3R,4S,5S,6R)-3,4,5-trihydroxy-6-(hydroxymethyl)oxan-2-yl]oxy}oxolan-3-yl (2E)-3-(4-hydroxy-3,5-dimethoxyphenyl)prop-2-enoate	C23 H32 O15	571.163	M+H	5.32501	409.11	203.052	185.042	391.1	120.01	70.0656	98.9754	72.0812	245.05	Others
SDW09676	di(3-pyridyl) 5-(tert-butyl)isophthalate	C22 H20 N2 O4	377.145	M+H	5.26925	243.087	172.087	216.077	69.0342	57.0343	297.064	198.066	99.0445	200.082	Others
SDW13327	NP-016596	C19 H30 O8	409.182	M+H	5.68127	293.08	201.054	392.149	72.0815	409.112	70.0658	70.8492	267.102	205.064	Others
SDW00868	NP-013179	C26 H32 O5	463.183	M+H	7.11631	447.152	448.16	287.136	184.013	51.4658	199.036	419.157	73.0174	156.018	Others
SDW02717	10-[(acetyloxy)methyl]-6-formyl-3-methylidene-2-oxo-2H,3H,3aH,4H,5H,8H,9H,11aH-cyclodeca[b]furan-4-yl 2-methylbutanoate	C22 H28 O7	427.172	M+Na	8.40832	216.076	104.993	262.981	217.083	201.052	344.984	233.078	176.044	219.063	Others
SDW03336	(2R)-7-Methoxy-3-oxo-3,4-dihydro-2H-1,4-benzoxazin-2-yl β-D-glucopyranoside	C15 H19 N O9	380.094	M+Na	4.80146	172.075	144.081	218.042	185.042	218.081	81.0341	200.032	200.07	109.029	Others
SDW03538	(2R,3S,4S,5R,6R)-2-({[(2S,3R,4R)-3,4-dihydroxy-4-(hydroxymethyl)oxolan-2-yl]oxy}methyl)-6-{[4-(4-hydroxyphenyl)butan-2-yl]oxy}oxane-3,4,5-triol	C21 H32 O11	483.183	M+Na	6.89597	317.084	229.068	96.7768	161.029	185.042	143.019	151.039	71.965	203.04	Others
SDW05408	NP-003251	C27 H34 O12	573.194	M+Na	6.00726	177.091	178.095	70.2845	193.086	70.0659	70.2825	194.089	309.095	221.117	Others
SDW07421	(1E)-3-hydroxy-3-[(4Z)-3-hydroxy-5-oxo-4-(2-{[3,4,5-trihydroxy-6-(hydroxymethyl)oxan-2-yl]oxy}ethylidene)oxolan-2-yl]-2-methylprop-1-en-1-yl (2E)-3-(4-hydroxyphenyl)prop-2-enoate	C25 H30 O13	561.157	M+H	6.48172	192.039	391.099	177.016	193.047	530.139	531.147	207.065	70.0658	247.058	Others
SDW07424	5-{(2R,3S)-6-Hydroxy-2-(4-hydroxyphenyl)-4-[(E)-2-(4-hydroxyphenyl)vinyl]-2,3-dihydro-1-benzofuran-3-yl}-1,3-benzenediol	C28 H22 O6	107.049	M+H	4.50777	349.107	239.07	361.107	199.075	255.065	98.9758	455.15	237.028	219.017	Others
SDW00013			86.097	M+NH4	0.958014	69.0706	57.0581	58.0659	56.0503	53.003	67.0549	70.0658	71.0736	86.0606	Unknown
SDW00046			119.019	M+H	0.642313	137.03	101.009	133.035	72.4761	72.4742	123.87	136.213	74.1368	120.096	Unknown
SDW00063		C14 H33 F N6 O3	353.266	M+H	11.3511	291.231	81.0705	165.127	353.145	91.0547	93.0703	109.065	95.086	311.189	Unknown
SDW00069			119.019	M+H	0.641176	101.009	137.029	161.029	179.04	132.958	150.969	133.035	82.9983	175.045	Unknown
SDW00072			85.029	M+H	1.22451	57.0343	55.0187	71.5481	71.5461	104.18	60.1008	84.9119	95.4625	90.4506	Unknown
SDW00095		C21 H39 F3 O2	381.297	M+H	12.1338	339.22	321.209	56.9656	357.231	353.236	339.2	71.9526	73.0636	135.003	Unknown
SDW00110			85.029	M+H	0.834419	57.0343	55.0187	85.0482	57.0536	84.9119	72.3033	56.0503	93.3084	65.9532	Unknown
SDW00111		C13 H20 N2 O7 S2	381.079	M+H	0.901944	219.026	201.016	71.9295	71.9275	403.211	404.97	113.176	219.036	107.018	Unknown
SDW00116			119.019	M+H	0.642849	101.009	82.9983	133.035	121.024	58.9985	60.0063	115.024	72.9994	72.9378	Unknown
SDW00118		C25 H46 F N3 O7	104.107	M+H	10.8647	184.073	86.097	125	520.339	60.0816	71.0737	502.329	98.9846	67.055	Unknown
SDW00120		C10 H22 N2 O4	118.086	M+H	0.751332	58.0659	59.0737	132.102	235.165	73.1245	170.664	170.671	86.5329	86.5303	Unknown
SDW00138		C18 H33 F5 N O3 P3	161.06	M+H	5.53725	105.07	133.065	193.086	76.0222	308.091	179.048	115.055	162.022	84.045	Unknown
SDW00153		C21 H42 F N3 O7	104.107	M+H	10.4399	184.073	86.0969	468.308	125	60.0815	450.297	71.0736	57.0707	98.9845	Unknown
SDW00174			119.019	M+H	0.642512	150.969	132.958	101.009	72.9378	104.964	121.017	137.03	133.034	90.9482	Unknown
SDW00182		C26 H41 N2 O5 P	493.28	M+H	4.99102	119.049	265.086	120.057	155.118	91.0547	251.07	98.0969	112.112	100.076	Unknown
SDW00184		C19 H31 N5 O9	86.097	M+H	0.981081	132.102	85.029	127.039	145.049	69.0705	97.0287	69.0342	163.06	71.7161	Unknown
SDW00188			98.9758	M+H	0.345725	116.986	56.9656	134.996	121.017	71.9526	103.006	73.0747	69.0342	155.637	Unknown
SDW00213			81.0176	M+H	0.823936	65.9943	63.0072	64.015	81.026	66.0027	64.9865	61.0114	81.034	53.0394	Unknown
SDW00008	Valine	C5 H11 N O2	72.0815	M+NH4	0.855819	118.065	118.086	91.0547	55.055	59.0737	58.0659	117.057	70.0658	72.4112	Unknown
SDW00041	AB-005	C23 H32 N2 O	353.266	M+H	11.5198	311.189	70.3789	70.381	353.145	56.9656	70.3825	293.178	91.0547	229.989	Unknown
SDW00239		C6 H9 F3 N O P	98.9757	M+H	1.01167	116.986	134.996	200.091	85.0289	56.9655	128.986	73.029	57.0343	97.0288	Unknown
SDW00241		C22 H27 F3 N2 O4	177.054	M+H	7.20622	145.028	265.154	117.034	149.06	89.039	441.201	291.133	248.128	72.0815	Unknown
SDW00245	Levulinic acid	C5 H8 O3	69.0342	M+H	1.19028	71.0692	73.0291	71.0498	57.0343	70.0659	99.0444	117.074	59.0499	117.066	Unknown
SDW00249	2-Amino-4-methylpyrimidine	C5 H7 N3	110.072	M+NH4	0.763665	83.061	93.0452	56.0503	81.0453	82.0532	69.0454	66.0346	54.0346	68.0503	Unknown
SDW00250	Methylenesuccinate	C5 H4 O4	68.9978	M+H	0.849606	87.0082	129.018	71.675	86.097	71.673	84.0814	83.0609	83.0496	112.076	Unknown
SDW00263	4-(2-Methyl-4-thiazolyl)phenol	C10 H9 N O S	192.047	M+NH4	2.52304	159.068	146.06	209.074	164.053	123.026	149.005	151.021	165.037	131.073	Unknown
SDW00274			72.0815	M+H	0.651166	55.055	72.2237	72.2257	65.0914	72.1016	54.7024	63.3358	56.6264	51.565	Unknown
SDW00278		C2 H2 N4 O S	98.9758	M+H	0.316158	116.986	91.0548	134.996	56.9656	116.062	131.086	72.1278	148.974	130.963	Unknown
SDW00279	4033747	C26 H52 N O7 P	104.107	M+H	11.3327	184.073	86.0969	125	522.355	60.0815	504.344	71.0736	98.9845	69.0706	Unknown
SDW00284	N6-Acetyl-L-lysine	C8 H16 N2 O3	130.05	M+H	0.767706	84.0813	60.0815	72.0814	126.091	70.0658	188.997	207.008	130.086	85.0289	Unknown
SDW00289		C4 H10 O9	119.019	M+H	0.639973	137.029	179.04	101.009	161.029	143.019	133.035	82.9981	203.04	121.023	Unknown
SDW00290	2-Oxobutyric acid	C4 H6 O3	103.039	M+H	1.22686	85.029	57.0343	60.9585	102.969	97.0081	120.979	75.0447	121.017	103.055	Unknown
SDW00297		C24 H42 N10 O3	541.334	M+Na	11.3099	203.052	259.079	185.042	104.993	438.206	70.3631	104.107	186.995	379.282	Unknown
SDW00303		C18 H29 N5 O9	72.0815	M+H	0.833484	118.086	55.055	85.0289	127.039	145.049	97.0289	71.0482	69.0342	376.723	Unknown
SDW00305		C16 H27 F2 N3 O3 P2 S	330.111	M+NH4	1.46943	130.05	193.032	155.016	84.045	441.143	313.085	129.066	167.016	459.154	Unknown
SDW00308		C27 H49 F2 N2 O3 P	541.334	M+Na	11.0829	203.052	185.042	259.079	104.107	438.206	104.993	86.0971	184.073	379.282	Unknown
SDW00321		C19 H26 F2 N4 O3 P2	330.111	M+H	1.22592	130.05	193.032	155.016	84.045	441.143	313.085	459.154	129.066	167.016	Unknown
SDW00322		C29 H52 N2 O S3		M+H	11.1455										Unknown
SDW00326		C7 H2 N6 O3	98.9757	M+H	1.1381	116.986	134.996	219.026	219.076	177.007	158.996	219.113	72.7589	219.174	Unknown
SDW00331	4033747	C26 H52 N O7 P	104.107	M+H	11.0866	184.073	86.097	125	522.355	60.0816	504.344	71.0737	98.9846	69.0706	Unknown
SDW00342		C20 H32 F2 N3 O7 P	137.06	M+H	0.903929	154.086	91.0548	119.049	109.065	65.0392	81.0705	166.63	104.276	132.172	Unknown
SDW00346	Homo-L-arginine	C7 H16 N4 O2	70.0658	M+H	0.749084	189.134	116.071	74.0719	144.113	57.0455	158.092	84.0813	172.108	115.087	Unknown
SDW00347		C27 H44 F N3 O7	146.982	M+H	10.7787	483.247	86.097	542.321	81.0704	67.0549	95.0859	69.0706	337.273	55.055	Unknown
SDW00352		C26 H34 N2 O7 S	160.076	M+H	1.67597	177.102	132.081	115.055	117.057	133.065	142.065	105.07	159.068	72.2884	Unknown
SDW00359		C17 H47 F2 N10 O P3		M+H	10.9278										Unknown
SDW00361	Xanthine	C5 H4 N4 O2	153.04	M+H	1.30107	110.035	154.024	128.045	136.014	55.0299	82.0406	135.023	111.023	139.018	Unknown
SDW00364	N-Nitro-1-nitroso-4,5-dihydro-1H-imidazol-2-amine	C3 H5 N5 O3	98.9757	M+H	0.626198	116.986	134.996	56.9656	119.019	159.05	177.061	101.009	153.007	137.029	Unknown
SDW00365	2-Phenylglycine	C8 H9 N O2	107.049	M+NH4	0.921758	135.044	152.07	134.06	106.065	79.0548	109.029	152.034	56.0503	81.0341	Unknown
SDW00366		C25 H47 F2 N2 O3 P	515.318	M+Na	11.2816	104.107	86.097	198.968	485.776	478.329	184.073	180.957	125	926.52	Unknown
SDW00374	Acetophenone	C8 H8 O	121.065	M+H	1.05107	103.055	91.0548	93.0704	95.0496	53.0394	105.045	77.0392	55.0187	70.6935	Unknown
SDW00379			84.0813	M+H	0.869693	56.0503	84.045	55.055	67.055	82.0657	69.058	57.0708	53.0031	65.0392	Unknown
SDW00393	2-Acetamidophenol	C8 H9 N O2	152.057	M+H	1.02234	153.04	135.03	110.035	128.046	109.051	96.053	134.046	134.06	154.025	Unknown
SDW00394	DIELAIDIN	C39 H72 O5	643.526	M+Na	15.6274	361.271	339.289	69.0706	55.0551	83.0861	95.086	305.245	81.0704	67.055	Unknown
SDW00401	4033747	C26 H52 N O7 P	184.073	M+H	11.1996	86.097	125	60.0816	104.107	71.0736	98.9845	522.355	504.344	69.0706	Unknown
SDW00406	methyl 2-{[(1,3,3-trimethylbicyclo[2.2.1]hept-2-yl)amino]sulfonyl}benzoate	C18 H25 N O4 S	390.115	M+Na	4.76017	228.063	185.042	182.058	210.052	203.052	173.042	113.021	344.097	85.0288	Unknown
SDW00409	ACPC	C4 H7 N O2	56.0503	M+H	0.699718	74.0243	102.055	74.0607	84.0449	85.029	71.922	71.924	96.704	134.838	Unknown
SDW00412	2-Amino-4-methylpyrimidine	C5 H7 N3	110.072	M+H	0.667425	83.061	93.0452	56.0503	81.0454	82.0532	69.0454	66.0345	111.056	84.045	Unknown
SDW00415	15-methylhexadecaphytosphingosine	C17 H37 N O3	60.0452	M+H	9.32258	304.284	286.274	268.263	56.0503	55.0551	69.0706	95.0861	67.055	81.0705	Unknown
SDW00422	(+)-Thienamycin	C11 H16 N2 O4 S	167.016	M+H	0.911688	273.09	256.064	155.016	139.021	239.037	184.043	88.0399	193.032	111.027	Unknown
SDW00423	Eplerenone	C24 H30 O6	437.193	M+Na	8.86426	303.12	70.0658	115.087	84.045	407.184	226.118	157.062	455.8	119.086	Unknown
SDW00424	3-O-Isobutyryl-beta-D-fructofuranosyl 3-O-dodecanoyl-4-O-(3-methylbutanoyl)-alpha-D-glucopyranoside	C33 H58 O14	701.371	M+Na	10.7257	539.318	347.095	185.042	259.078	365.105	203.052	321.227	421.132	377.266	Unknown
SDW00429	Dihydrothymine	C5 H8 N2 O2	68.9978	M+H	0.749647	129.018	87.0083	111.008	83.061	83.0134	84.0814	55.0186	72.0277	112.112	Unknown
SDW00430	Pregnane-3,3-diol	C21 H36 O2	321.278	M+H	12.0779	57.0707	71.0862	111.044	85.1018	55.055	53.003	80.9484	69.0706	170.519	Unknown
SDW00431	5-(2-Nitroprop-1-enyl)-1,3-benzodioxole	C10 H9 N O4	162.055	M+H	3.81134	190.05	134.06	144.044	116.05	148.039	208.06	92.0499	149.06	107.049	Unknown
SDW00435	1-O-(indol-3-ylacetyl)-beta-D-glucose	C16 H19 N O7	130.065	M+H	4.64958	176.071	81.0341	109.029	85.029	69.0343	57.0342	103.055	53.0393	320.113	Unknown
SDW00441		C20 H42 N2 O	72.0815	M+H	10.0506	327.336	310.31	57.0707	71.0862	95.086	85.1017	81.0705	83.0861	109.101	Unknown
SDW00442			56.0503	M+H	0.997972	55.9352	50.1995	77.6538	69.1566	55.0424	131.078	73.7131	68.8273		Unknown
SDW00452	Pregabalin	C8 H17 N O2	160.133	M+H	0.902194	60.0815	58.0659	59.0737	59.0499	55.055	73.0655	57.0343	118.968	101.06	Unknown
[truncated: 2,302 more rows]

## Sheet: Table S4
Table S4.Specific metabolites in the three fruits and three crops
[truncated: 201 more rows]

[truncated: 1 more sheets: Table S5]
